# Supplementary material for: Aversive stimuli drive hypothalamus-to-habenula excitation to promote escape behavior
Source: eLife. 2017 Sep 5;6:e30697. doi: 10.7554/eLife.30697 (PMC5606847; doi:10.7554/eLife.30697)
Supplement: Figure 1—source data 1. [file elife-30697-fig1-data1.xlsx]

## Sheet: Figure 1
Figure 1 a																					Figure 1 b
Example histogram latency to escape during trials														Shuttle box performance							Example PSTH 20150502SL1				Normalized PSTHs, Fs excited cells
				Latencies, ms										Failures, n	Latencies, ms
Trial	nl2box1	tailbox1	PODbox1	PODOGbox1	POGbox1	nlbox2	PODbox2	PODOGbox2	POGbox2	tailbox2			mouse n								time, bin 10 ms	Spikes			mouse n	1	2	3	4	5	6	7	8	9	10	11	12	13	14	15	16	17	18	19	20	21	22	23
1	8802	2482	1648	856	4306	2232	2317	5468	3087	5765			nl2box1	0	2931.47						-2	0			time, bin 10 ms
2	4883	1204	9517	1086	2160	2078	1263	814	1806	1720			tailbox1	0	2572.93						-1.99	1			-2	-0.031	-0.0094919	-0.00590909	-0.04625	0.117083	-0.0235	-0.0235	0.104444	-0.00142857	-0.0105	0.0285	-0.0616667	-0.00316667	-0.00483333	-0.0218333	-0.0238333	-0.0025	0.0521667	0.0146667	-0.008	-0.0128333	0.029	-0.0115
3	8422	6049	8772	1421	2113	2514	1041	4018	5297	10000			PODbox1	0	2481.97						-1.98	0			-1.99	-0.031	-0.0094919	-0.00590909	0.01625	-0.0495833	-0.0235	-0.0235	-0.00666667	-0.00142857	-0.0105	-0.00483333	0.0716667	-0.00316667	-0.00483333	-0.0218333	0.0428333	-0.0025	0.0521667	0.0146667	-0.008	-0.0128333	-0.00433333	0.0218333
4	5239	1251	6153	7295	1294	8167	1072	3312	2334	10000			PODOGbox1	1	2886.53						-1.97	1			-1.98	-0.031	-0.0094919	-0.00590909	-0.04625	0.03375	-0.0235	-0.0235	-0.00666667	-0.00142857	-0.0105	0.0285	0.0383333	-0.00316667	0.0285	-0.0218333	0.0428333	-0.0025	-0.0145	-0.0186667	-0.008	-0.0128333	-0.0376667	0.0218333
5	2530	2968	5394	2883	1946	8231	2444	423	3880	2813			POGbox1	2	3639						-1.96	0			-1.97	-0.031	-0.0094919	-0.00590909	-0.04625	-0.0495833	-0.0235	-0.0235	-0.00666667	-0.00142857	-0.0105	-0.00483333	-0.0283333	-0.00316667	-0.00483333	-0.0218333	0.0095	-0.0025	-0.0145	-0.0186667	-0.008	-0.0128333	-0.0376667	-0.0115
6	9829	2259	8838	1399	3299	6521	1137	4958	2755	2219			nlbox2	2	4150.17						-1.95	0			-1.96	-0.031	-0.0094919	-0.00590909	0.01625	-0.0495833	-0.0235	-0.0235	-0.00666667	-0.00142857	0.0395	-0.00483333	0.005	-0.00316667	-0.00483333	-0.0218333	0.0428333	-0.0025	0.0521667	0.0146667	0.0253333	0.0205	0.0623333	-0.0115
7	3368	10000	6521	2813	1696	3357	1180	2540	4818	9021			PODbox2	4	4089.5						-1.94	1			-1.95	0.169	-0.0094919	-0.00590909	-0.04625	-0.0495833	-0.0235	-0.0235	0.104444	-0.00142857	-0.0105	-0.00483333	0.0383333	-0.00316667	-0.00483333	-0.0218333	-0.0238333	-0.0025	0.0188333	-0.0186667	0.0253333	-0.0128333	0.0623333	-0.0115
8	6202	1738	10000	2009	1640	2003	3221	1916	1487	3070			PODOGbox2	4	5650.17						-1.93	0			-1.94	-0.031	-0.0094919	-0.00590909	-0.04625	-0.0495833	-0.0235	-0.0235	-0.00666667	-0.00142857	-0.0105	-0.00483333	0.0716667	0.0301667	-0.00483333	0.0448333	-0.0571667	-0.0025	-0.0145	0.048	-0.008	-0.0128333	-0.00433333	-0.0115
9	4747	10000	8595	1653	2439	1129	1919	1631	1891	3153			POGbox2	1	2447.5						-1.92	0			-1.93	-0.031	0.101619	0.085	0.07875	0.117083	-0.0235	-0.0235	-0.00666667	-0.00142857	0.0145	0.0285	-0.0616667	-0.00316667	0.0285	-0.0218333	-0.0238333	-0.0025	0.0188333	-0.0186667	-0.008	-0.0128333	-0.0376667	-0.0115
10	2037	2503	10000	4212	8039	4240	2459	1590	1614	3116			tailbox2	2	3168.63						-1.91	0			-1.92	-0.031	-0.0094919	-0.00590909	-0.04625	-0.0495833	-0.0235	-0.0235	-0.00666667	-0.00142857	-0.0105	-0.00483333	0.005	-0.00316667	-0.00483333	-0.0218333	-0.0571667	-0.0025	0.0188333	0.0146667	-0.008	0.0205	-0.0376667	0.0218333
11	4064	8280	9365	1054	3101	1921	941	1429	2070	2058											-1.9	0			-1.91	0.369	-0.0094919	-0.00590909	0.01625	-0.0495833	-0.0235	-0.0235	-0.00666667	-0.00142857	-0.0105	-0.00483333	0.0383333	-0.00316667	-0.00483333	-0.0218333	-0.0571667	-0.0025	-0.0145	-0.0186667	0.0253333	-0.0128333	-0.0376667	-0.0115
12	10000	2362	4684	1463	1403	1972	3907	5983	1422	3451											-1.89	1			-1.9	-0.031	-0.0094919	-0.00590909	-0.04625	-0.0495833	-0.0235	-0.0235	-0.00666667	-0.00142857	0.0145	-0.00483333	0.005	-0.00316667	-0.00483333	0.0115	-0.0238333	-0.0025	0.0188333	-0.0186667	-0.008	0.0205	0.029	-0.0115
13	6071	2019	10000	1192	10000	4946	1335	362	1423	2373											-1.88	0			-1.89	-0.031	-0.0094919	-0.00590909	0.01625	-0.0495833	-0.0235	-0.0235	-0.00666667	-0.00142857	0.0395	-0.00483333	-0.0283333	-0.00316667	-0.00483333	0.0448333	-0.0905	-0.0025	0.0188333	-0.0186667	0.0253333	-0.0128333	-0.00433333	0.0218333
14	2440	2333	2474	9297	2305	1658	1570	2208	1708	2231											-1.87	0			-1.88	-0.031	-0.0094919	-0.00590909	0.01625	0.03375	0.0765	0.0765	-0.00666667	-0.00142857	-0.0105	-0.00483333	-0.0283333	-0.00316667	-0.00483333	-0.0218333	-0.0238333	-0.0025	-0.0145	-0.0186667	-0.008	-0.0128333	-0.00433333	0.0218333
15	1639	3315	2494	1148	1731	2246	1056	1976	1440	4676											-1.86	0			-1.87	-0.031	-0.0094919	-0.00590909	0.07875	-0.0495833	-0.0235	-0.0235	-0.00666667	-0.00142857	-0.0105	-0.00483333	0.0383333	-0.00316667	-0.00483333	-0.0218333	-0.0238333	-0.0025	-0.0145	-0.0186667	0.0253333	-0.0128333	0.029	0.0218333
16	2569	3736	9076	1361	1498	1288	1255	1960	3867	2685											-1.85	0			-1.86	-0.031	-0.0094919	-0.00590909	-0.04625	-0.0495833	0.0765	0.0765	-0.00666667	-0.00142857	-0.0105	-0.00483333	-0.0283333	-0.00316667	-0.00483333	-0.0218333	-0.0238333	-0.0025	0.0188333	0.048	-0.008	0.0205	-0.0376667	-0.0115
17	2978	2693	2101	965	2825	1892	4065	1300	5257	1583											-1.84	0			-1.85	-0.031	-0.0094919	-0.00590909	-0.04625	-0.0495833	0.0765	0.0765	-0.00666667	-0.00142857	-0.0105	-0.00483333	-0.0283333	-0.00316667	-0.00483333	-0.0218333	-0.0238333	-0.0025	0.0188333	-0.0186667	-0.008	-0.0128333	-0.00433333	-0.0115
18	3731	10000	2289	2071	1935	2287	1658	791	2504	6047											-1.83	0			-1.84	-0.031	-0.0094919	-0.00590909	-0.04625	-0.0495833	-0.0235	-0.0235	-0.00666667	-0.00142857	0.0145	0.0285	-0.0283333	-0.00316667	-0.00483333	-0.0218333	-0.0238333	-0.0025	-0.0145	0.0146667	-0.008	-0.0128333	0.029	-0.0115
19	2302	3540	1724	10000	2691	1950	1088	1388	1991	4580											-1.82	0			-1.83	-0.031	-0.0094919	-0.00590909	-0.04625	0.03375	0.0765	0.0765	-0.00666667	-0.00142857	0.0145	-0.00483333	-0.0616667	-0.00316667	-0.00483333	0.0448333	0.0761667	-0.0025	-0.0145	0.0146667	0.0253333	-0.0128333	-0.00433333	-0.0115
20	1558	1203	1332	1131	10000	3151	1468	1201	1488	2237											-1.81	0			-1.82	-0.031	0.101619	-0.00590909	0.01625	-0.0495833	0.0765	0.0765	-0.00666667	-0.00142857	0.0145	-0.00483333	0.0383333	-0.00316667	-0.00483333	0.0115	0.142833	-0.0025	0.0521667	-0.0186667	-0.008	-0.0128333	0.029	0.0218333
21	2718	2244	3017	1524	5455	5668	4975	3006	4883	1748											-1.8	0			-1.81	-0.031	-0.0094919	-0.00590909	-0.04625	-0.0495833	-0.0235	-0.0235	-0.00666667	-0.00142857	-0.0105	-0.00483333	-0.0283333	-0.00316667	-0.00483333	-0.0218333	0.0428333	-0.0025	-0.0145	-0.0186667	-0.008	-0.0128333	0.0956667	-0.0115
22	987	9302	5555	1921	3120	3301	2175	1542	1572	3685											-1.79	0			-1.8	-0.031	-0.0094919	-0.00590909	0.07875	0.03375	-0.0235	-0.0235	0.215556	-0.00142857	-0.0105	-0.00483333	0.0716667	-0.00316667	0.0618333	-0.0218333	0.1095	-0.0025	-0.0145	-0.0186667	-0.008	0.0205	-0.00433333	-0.0115
23	4178	4449	10000	3463	1894	962	4032	1454	1957	4670											-1.78	0			-1.79	-0.031	-0.0094919	-0.00590909	-0.04625	0.03375	-0.0235	-0.0235	-0.00666667	0.141429	-0.0105	-0.00483333	-0.0616667	-0.00316667	-0.00483333	0.0448333	0.142833	0.0308333	-0.0145	-0.0186667	-0.008	0.0205	-0.0376667	-0.0115
24	2241	10000	2088	2882	1589	1762	6106	1294	2994	2286											-1.77	0			-1.78	-0.031	-0.0094919	0.085	0.07875	-0.0495833	-0.0235	-0.0235	-0.00666667	-0.00142857	-0.0105	-0.00483333	0.105	-0.00316667	-0.00483333	-0.0218333	-0.0571667	-0.0025	-0.0145	-0.0186667	-0.008	-0.0128333	-0.00433333	0.0218333
25	2663	2300	6360	800	1768	3723	7946	2172	1617	1344											-1.76	1			-1.77	-0.031	0.101619	-0.00590909	-0.04625	0.03375	0.0765	0.0765	-0.00666667	0.141429	-0.0105	-0.00483333	0.0383333	-0.00316667	-0.00483333	0.0115	-0.0238333	-0.0025	-0.0145	-0.0186667	-0.008	-0.0128333	-0.00433333	-0.0115
26	1818	1904	9727	1233	2628	1108	5550	1764	3540	3285											-1.75	1			-1.76	-0.031	-0.0094919	-0.00590909	0.14125	0.117083	-0.0235	-0.0235	-0.00666667	-0.00142857	0.0145	-0.00483333	-0.0283333	-0.00316667	-0.00483333	0.0115	0.0095	-0.0025	-0.0145	-0.0186667	-0.008	-0.0128333	-0.00433333	-0.0115
27	1694	1162	3133	617	1871	1051	2074	5612	1375	3396											-1.74	0			-1.75	-0.031	-0.0094919	-0.00590909	0.01625	-0.0495833	-0.0235	-0.0235	-0.00666667	-0.00142857	-0.0105	-0.00483333	0.005	-0.00316667	-0.00483333	-0.0218333	0.142833	-0.0025	-0.0145	-0.0186667	-0.008	0.0205	-0.0376667	0.0218333
28	10000	1490	2361	1199	6598	1847	4275	1137	1577	2178											-1.73	0			-1.74	-0.031	-0.0094919	-0.00590909	-0.04625	0.03375	-0.0235	-0.0235	-0.00666667	-0.00142857	-0.0105	0.0285	0.005	-0.00316667	0.0285	-0.0218333	0.0095	-0.0025	-0.0145	-0.0186667	-0.008	-0.0128333	-0.00433333	-0.0115
29	3112	6640	3626	1340	1797	3311	1924	9699	10000	1912											-1.72	1			-1.73	-0.031	-0.0094919	-0.00590909	-0.04625	0.200417	-0.0235	-0.0235	-0.00666667	-0.00142857	-0.0105	0.0285	-0.0283333	-0.00316667	-0.00483333	-0.0218333	0.0428333	-0.0025	-0.0145	-0.0186667	-0.008	0.0205	-0.0376667	-0.0115
30	1683	3259	2661	3137	1918	1428	1735	1511	4942	1868											-1.71	0			-1.72	-0.031	-0.0094919	-0.00590909	0.01625	0.03375	-0.0235	-0.0235	-0.00666667	-0.00142857	0.0145	-0.00483333	-0.0283333	-0.00316667	-0.00483333	0.0115	0.0428333	-0.0025	-0.0145	0.048	-0.008	-0.0128333	-0.0376667	0.0218333
																					-1.7	0			-1.71	-0.031	-0.0094919	-0.00590909	-0.04625	-0.0495833	-0.0235	-0.0235	-0.00666667	-0.00142857	-0.0105	-0.00483333	0.005	-0.00316667	0.0285	0.0115	0.0761667	0.0308333	-0.0145	0.048	-0.008	-0.0128333	0.029	-0.0115
																					-1.69	0			-1.7	-0.031	-0.0094919	-0.00590909	0.01625	-0.0495833	-0.0235	-0.0235	-0.00666667	-0.00142857	-0.0105	-0.00483333	-0.0283333	-0.00316667	-0.00483333	-0.0218333	0.0428333	-0.0025	0.0188333	0.0146667	-0.008	0.0205	0.0623333	-0.0115
Photometry, photon counting - Example trace mouse 3								Photometry, normalized data - timecourse graph shock responses													-1.68	0			-1.69	-0.031	-0.0094919	-0.00590909	-0.04625	-0.0495833	-0.0235	-0.0235	-0.00666667	-0.00142857	-0.0105	-0.00483333	-0.0283333	-0.00316667	-0.00483333	-0.0218333	0.0761667	-0.0025	-0.0145	-0.0186667	-0.008	-0.0128333	-0.0376667	-0.0115
	Trial	1	2	3	4	5															-1.67	1			-1.68	-0.031	-0.0094919	-0.00590909	0.07875	0.117083	-0.0235	-0.0235	0.104444	-0.00142857	0.0145	-0.00483333	0.005	-0.00316667	-0.00483333	0.0448333	0.0095	-0.0025	0.0188333	0.0146667	-0.008	-0.0128333	-0.0376667	-0.0115
time, s												shock									-1.66	2			-1.67	-0.031	-0.0094919	-0.00590909	-0.04625	0.117083	-0.0235	-0.0235	-0.00666667	-0.00142857	-0.0105	-0.00483333	-0.0283333	-0.00316667	-0.00483333	0.0115	-0.0238333	-0.0025	-0.0145	-0.0186667	0.0253333	-0.0128333	0.0623333	-0.0115
0		322.44	321.92	319.58	319.86	328.88			bin, s	-10	-5	0	5	10	15	20	25				-1.65	1			-1.66	-0.031	-0.0094919	-0.00590909	0.01625	0.03375	-0.0235	-0.0235	-0.00666667	-0.00142857	0.0145	-0.00483333	0.0716667	-0.00316667	-0.00483333	-0.0218333	0.0095	-0.0025	-0.0145	-0.0186667	-0.008	-0.0128333	-0.0376667	0.0218333
0.5		322.88	333.48	319.62	319.64	322.62		mouse													-1.64	0			-1.65	-0.031	-0.0094919	-0.00590909	-0.04625	0.03375	-0.0235	-0.0235	-0.00666667	-0.00142857	-0.0105	-0.00483333	-0.0283333	-0.00316667	-0.00483333	-0.0218333	0.0095	-0.0025	-0.0145	-0.0186667	-0.008	-0.0128333	0.0623333	-0.0115
1		317.36	325.84	323.08	331.84	314.8		1		0.998624	1.00138	1.03855	1.0209	1.00577	1.00252	0.998897	0.99774				-1.63	1			-1.64	-0.031	-0.0094919	-0.00590909	0.07875	-0.0495833	-0.0235	-0.0235	-0.00666667	-0.00142857	0.0395	-0.00483333	-0.0616667	-0.00316667	-0.00483333	0.0781667	-0.0238333	-0.0025	-0.0145	-0.0186667	0.0253333	-0.0128333	-0.00433333	-0.0115
1.5		322	326.68	321.36	336	323.46		2		0.99427	1.00573	1.09842	1.05135	1.02925	1.00643	1.01374	1.00237				-1.62	0			-1.63	-0.031	-0.0094919	-0.00590909	-0.04625	0.117083	-0.0235	-0.0235	-0.00666667	-0.00142857	-0.0105	0.0285	0.005	-0.00316667	-0.00483333	-0.0218333	-0.0571667	-0.0025	-0.0145	-0.0186667	-0.008	-0.0128333	0.029	-0.0115
2		316.12	323.2	314.14	338.48	332.82		3		1.00577	0.994234	1.09122	1.05962	1.01762	1.01445	0.998346	1.00428				-1.61	1			-1.62	0.169	-0.0094919	-0.00590909	0.01625	-0.0495833	0.1765	0.1765	-0.00666667	-0.00142857	0.0145	-0.00483333	0.0383333	-0.00316667	-0.00483333	0.0115	-0.0571667	-0.0025	0.0188333	-0.0186667	-0.008	-0.0128333	0.029	-0.0115
2.5		319.06	319.88	320.08	327.4	338.22															-1.6	0			-1.61	-0.031	-0.0094919	-0.00590909	-0.04625	-0.0495833	0.0765	0.0765	-0.00666667	-0.00142857	0.0145	-0.00483333	-0.0616667	-0.00316667	-0.00483333	-0.0218333	-0.0238333	-0.0025	0.0188333	-0.0186667	-0.008	-0.0128333	-0.00433333	-0.0115
3		334.34	330.66	319.26	321.481	326.94															-1.59	0			-1.6	-0.031	-0.0094919	-0.00590909	0.01625	-0.0495833	-0.0235	-0.0235	-0.00666667	-0.00142857	-0.0105	0.0285	0.005	-0.00316667	-0.00483333	-0.0218333	0.0428333	-0.0025	0.0188333	0.0146667	-0.008	0.0538333	-0.00433333	-0.0115
3.5		332.84	337.52	321.4	327.26	336.82															-1.58	0			-1.59	-0.031	-0.0094919	-0.00590909	-0.04625	0.117083	-0.0235	-0.0235	-0.00666667	-0.00142857	-0.0105	-0.00483333	0.0383333	-0.00316667	-0.00483333	0.0448333	-0.0571667	-0.0025	0.0521667	-0.0186667	0.0253333	-0.0128333	0.029	-0.0115
4		322	322.88	318.3	330.26	324.64															-1.57	1			-1.58	0.169	0.101619	-0.00590909	0.01625	-0.0495833	-0.0235	-0.0235	-0.00666667	-0.00142857	0.0145	-0.00483333	0.0383333	-0.00316667	-0.00483333	-0.0218333	-0.0571667	-0.0025	-0.0145	-0.0186667	-0.008	0.0538333	-0.0376667	-0.0115
4.5		329.16	305.64	318.82	327.18	318.82															-1.56	0			-1.57	-0.031	0.101619	-0.00590909	-0.04625	-0.0495833	-0.0235	-0.0235	-0.00666667	-0.00142857	0.0145	0.0285	0.005	-0.00316667	0.0285	0.0448333	0.0095	-0.0025	0.0188333	-0.0186667	-0.008	-0.0128333	0.029	-0.0115
5		335.88	316.68	316.54	331.48	339.42															-1.55	0			-1.56	-0.031	-0.0094919	-0.00590909	-0.04625	-0.0495833	-0.0235	-0.0235	-0.00666667	-0.00142857	-0.0105	-0.00483333	-0.0616667	-0.00316667	-0.00483333	-0.0218333	0.142833	-0.0025	-0.0145	-0.0186667	-0.008	-0.0128333	0.0623333	0.0218333
5.5		328.9	314.74	313.1	325.98	336.66															-1.54	1			-1.55	-0.031	-0.0094919	-0.00590909	0.07875	-0.0495833	0.1765	0.1765	-0.00666667	-0.00142857	0.0145	-0.00483333	0.005	-0.00316667	0.0285	-0.0218333	0.0095	-0.0025	0.0521667	-0.0186667	-0.008	-0.0128333	-0.00433333	-0.0115
6		324.58	322.3	318.4	331.06	318.54															-1.53	1			-1.54	-0.031	-0.0094919	0.085	-0.04625	-0.0495833	-0.0235	-0.0235	-0.00666667	-0.00142857	0.0145	-0.00483333	-0.0616667	-0.00316667	-0.00483333	-0.0218333	0.0761667	0.0308333	0.0521667	-0.0186667	-0.008	0.0205	-0.0376667	-0.0115
6.5		328.5	320.54	322.14	320.48	324.46															-1.52	0			-1.53	-0.031	-0.0094919	-0.00590909	0.07875	-0.0495833	0.0765	0.0765	-0.00666667	-0.00142857	-0.0105	-0.00483333	-0.0283333	-0.00316667	-0.00483333	0.0115	0.0761667	-0.0025	-0.0145	0.0813333	-0.008	0.0205	0.029	0.0218333
7		327.54	321.4	330.76	321.521	323.639															-1.51	1			-1.52	-0.031	-0.0094919	-0.00590909	-0.04625	0.03375	-0.0235	-0.0235	-0.00666667	-0.00142857	-0.0105	-0.00483333	-0.0283333	-0.00316667	-0.00483333	-0.0218333	0.0095	-0.0025	0.0188333	0.048	-0.008	-0.0128333	-0.0376667	-0.0115
7.5		327	319.16	343.1	321.12	321.86															-1.5	0			-1.51	-0.031	-0.0094919	-0.00590909	0.01625	0.117083	0.1765	0.1765	-0.00666667	-0.00142857	0.0145	-0.00483333	-0.0616667	0.0301667	-0.00483333	0.0115	-0.0238333	-0.0025	-0.0145	-0.0186667	-0.008	-0.0128333	-0.00433333	-0.0115
8		323.06	324.66	342.66	318.34	324.6															-1.49	0			-1.5	-0.031	-0.0094919	-0.00590909	0.01625	-0.0495833	-0.0235	-0.0235	-0.00666667	-0.00142857	-0.0105	-0.00483333	0.005	-0.00316667	-0.00483333	0.0115	-0.0238333	-0.0025	0.0188333	-0.0186667	-0.008	-0.0128333	-0.0376667	0.0218333
8.5		322.48	317.52	347.3	315.58	333.62															-1.48	0			-1.49	-0.031	-0.0094919	-0.00590909	0.01625	0.03375	-0.0235	-0.0235	0.104444	-0.00142857	0.0145	-0.00483333	-0.0283333	-0.00316667	-0.00483333	0.0115	0.0095	-0.0025	-0.0145	0.048	0.0586667	-0.0128333	-0.0376667	-0.0115
9		314.48	326.56	319.86	314.02	338															-1.47	0			-1.48	-0.031	-0.0094919	0.085	0.01625	-0.0495833	-0.0235	-0.0235	-0.00666667	-0.00142857	0.0395	-0.00483333	0.0383333	-0.00316667	-0.00483333	0.0115	-0.0238333	-0.0025	-0.0145	0.048	0.0253333	-0.0128333	0.029	-0.0115
9.5		318.74	318.12	313.82	329.46	341.639															-1.46	1			-1.47	-0.031	-0.0094919	-0.00590909	-0.04625	-0.0495833	-0.0235	-0.0235	-0.00666667	-0.00142857	0.0145	0.0285	0.0383333	-0.00316667	-0.00483333	-0.0218333	-0.0238333	-0.0025	-0.0145	0.0146667	0.0253333	0.0205	-0.00433333	-0.0115
10		313.58	323.2	315.44	327.16	351.5															-1.45	0			-1.46	0.169	0.101619	-0.00590909	-0.04625	0.03375	-0.0235	-0.0235	-0.00666667	-0.00142857	-0.0105	-0.00483333	0.005	-0.00316667	-0.00483333	0.0448333	-0.0238333	-0.0025	0.0188333	0.0146667	-0.008	-0.0128333	-0.00433333	-0.0115
10.5		323.7	330.08	313.44	330.02	342.34															-1.44	0			-1.45	0.169	-0.0094919	-0.00590909	0.01625	-0.0495833	-0.0235	-0.0235	-0.00666667	-0.00142857	-0.0105	-0.00483333	0.005	-0.00316667	0.0285	-0.0218333	-0.0238333	-0.0025	-0.0145	-0.0186667	-0.008	0.0205	-0.00433333	0.0218333
11		322.84	321.66	312.34	316.04	343.6															-1.43	0			-1.44	-0.031	-0.0094919	-0.00590909	0.01625	-0.0495833	-0.0235	-0.0235	-0.00666667	-0.00142857	-0.0105	-0.00483333	-0.0616667	-0.00316667	0.0285	0.0115	-0.0571667	-0.0025	-0.0145	0.0146667	-0.008	0.0205	-0.00433333	-0.0115
11.5		317.68	326.84	313.7	321.44	335.38															-1.42	0			-1.43	-0.031	-0.0094919	-0.00590909	0.01625	0.03375	-0.0235	-0.0235	-0.00666667	-0.00142857	-0.0105	-0.00483333	0.0383333	0.0301667	-0.00483333	0.0115	0.0095	-0.0025	-0.0145	-0.0186667	-0.008	-0.0128333	-0.0376667	0.0218333
12		326.66	313.14	310.84	321.1	336.84															-1.41	1			-1.42	-0.031	-0.0094919	-0.00590909	0.01625	-0.0495833	-0.0235	-0.0235	-0.00666667	-0.00142857	0.0145	-0.00483333	-0.0283333	-0.00316667	-0.00483333	0.0115	0.0095	-0.0025	-0.0145	-0.0186667	-0.008	-0.0128333	-0.00433333	0.0218333
12.5		333.6	318.64	313.28	328.48	332.86															-1.4	0			-1.41	-0.031	-0.0094919	-0.00590909	-0.04625	0.03375	-0.0235	-0.0235	-0.00666667	-0.00142857	0.0395	-0.00483333	-0.0616667	-0.00316667	-0.00483333	0.0115	0.0761667	-0.0025	0.0188333	0.048	-0.008	-0.0128333	-0.00433333	0.0218333
13		330.1	327.86	309.04	321.26	330.66															-1.39	0			-1.4	-0.031	0.101619	-0.00590909	0.07875	0.03375	-0.0235	-0.0235	-0.00666667	-0.00142857	-0.0105	-0.00483333	0.005	-0.00316667	-0.00483333	-0.0218333	0.1095	-0.0025	0.0188333	0.0146667	-0.008	-0.0128333	-0.0376667	-0.0115
13.5		314.7	323.66	311.1	332.62	324.16															-1.38	0			-1.39	-0.031	-0.0094919	0.085	-0.04625	0.03375	-0.0235	-0.0235	-0.00666667	-0.00142857	-0.0105	-0.00483333	-0.0616667	-0.00316667	-0.00483333	-0.0218333	-0.0571667	-0.0025	-0.0145	-0.0186667	-0.008	-0.0128333	-0.0376667	-0.0115
14		315.26	323.08	318.4	338.64	334.38															-1.37	0			-1.38	-0.031	-0.0094919	-0.00590909	-0.04625	-0.0495833	-0.0235	-0.0235	-0.00666667	-0.00142857	-0.0105	-0.00483333	-0.0616667	-0.00316667	-0.00483333	0.0115	0.0428333	-0.0025	-0.0145	-0.0186667	-0.008	-0.0128333	0.029	-0.0115
14.5		316.46	327.6	326.8	334.8	343.4															-1.36	1			-1.37	-0.031	-0.0094919	-0.00590909	-0.04625	-0.0495833	-0.0235	-0.0235	-0.00666667	-0.00142857	-0.0105	-0.00483333	-0.0283333	0.0635	-0.00483333	0.0115	0.0095	-0.0025	0.0188333	-0.0186667	0.0253333	0.0205	0.029	-0.0115
15		332.54	323.02	327.74	343.8	333.7															-1.35	0			-1.36	-0.031	-0.0094919	-0.00590909	0.01625	-0.0495833	0.0765	0.0765	-0.00666667	-0.00142857	0.0395	-0.00483333	0.005	-0.00316667	-0.00483333	-0.0218333	0.0761667	-0.0025	-0.0145	0.048	-0.008	-0.0128333	0.029	-0.0115
15.5		331	320.08	315.32	332.22	327.52															-1.34	0			-1.35	-0.031	-0.0094919	-0.00590909	0.07875	0.03375	-0.0235	-0.0235	-0.00666667	-0.00142857	-0.0105	0.0285	-0.0283333	-0.00316667	0.0285	-0.0218333	0.0095	-0.0025	-0.0145	-0.0186667	-0.008	-0.0128333	-0.00433333	-0.0115
16		343.98	313.02	319.26	341.36	333.42															-1.33	0			-1.34	-0.031	-0.0094919	-0.00590909	-0.04625	-0.0495833	-0.0235	-0.0235	-0.00666667	-0.00142857	-0.0105	-0.00483333	-0.0616667	-0.00316667	-0.00483333	-0.0218333	0.0428333	-0.0025	0.0855	0.0146667	-0.008	-0.0128333	-0.0376667	0.0218333
16.5		343.7	316.02	323.76	335.9	339.159															-1.32	0			-1.33	-0.031	-0.0094919	-0.00590909	0.01625	0.03375	-0.0235	-0.0235	-0.00666667	-0.00142857	-0.0105	-0.00483333	0.0716667	-0.00316667	-0.00483333	-0.0218333	-0.0571667	-0.0025	0.0188333	0.048	-0.008	0.0538333	0.029	-0.0115
17		344	322.88	319.94	326.52	346.24															-1.31	1			-1.32	-0.031	-0.0094919	-0.00590909	-0.04625	0.03375	0.0765	0.0765	-0.00666667	-0.00142857	0.0145	-0.00483333	0.005	-0.00316667	-0.00483333	-0.0218333	-0.0238333	-0.0025	-0.0145	-0.0186667	-0.008	-0.0128333	0.0623333	-0.0115
17.5		339.92	332.14	321.1	343.94	337.18															-1.3	0			-1.31	-0.031	-0.0094919	-0.00590909	-0.04625	-0.0495833	0.0765	0.0765	-0.00666667	-0.00142857	-0.0105	-0.00483333	0.005	-0.00316667	-0.00483333	0.0115	0.0428333	-0.0025	-0.0145	-0.0186667	-0.008	-0.0128333	-0.00433333	0.0218333
18		341.38	327.22	317.12	352.98	322.44															-1.29	2			-1.3	-0.031	-0.0094919	-0.00590909	0.07875	0.03375	-0.0235	-0.0235	-0.00666667	-0.00142857	-0.0105	-0.00483333	0.0716667	-0.00316667	-0.00483333	-0.0218333	0.0095	-0.0025	-0.0145	-0.0186667	-0.008	0.0538333	0.029	0.0551667
18.5		335.68	323.84	321.14	352.3	324.82															-1.28	0			-1.29	-0.031	-0.0094919	-0.00590909	0.01625	-0.0495833	-0.0235	-0.0235	-0.00666667	-0.00142857	0.0145	-0.00483333	0.138333	-0.00316667	-0.00483333	0.0115	-0.0238333	-0.0025	0.0188333	0.0146667	-0.008	-0.0128333	-0.0376667	-0.0115
19		332.48	324.46	320.58	336.02	318.06															-1.27	0			-1.28	0.169	-0.0094919	-0.00590909	-0.04625	-0.0495833	-0.0235	-0.0235	-0.00666667	-0.00142857	-0.0105	-0.00483333	-0.0283333	0.0301667	0.0285	0.0115	-0.0571667	-0.0025	-0.0145	-0.0186667	-0.008	-0.0128333	0.029	0.0218333
19.5		334.78	333.26	323.38	336.12	320.66															-1.26	0			-1.27	-0.031	-0.0094919	-0.00590909	-0.04625	0.117083	-0.0235	-0.0235	-0.00666667	-0.00142857	-0.0105	-0.00483333	0.005	-0.00316667	-0.00483333	0.0115	-0.0905	-0.0025	-0.0145	0.0146667	-0.008	-0.0128333	-0.00433333	-0.0115
20		322.32	326.78	321.7	339.38	323.28															-1.25	2			-1.26	-0.031	0.101619	-0.00590909	0.01625	-0.0495833	0.2765	0.2765	-0.00666667	-0.00142857	0.0145	-0.00483333	0.005	-0.00316667	0.0285	0.0115	-0.0238333	-0.0025	-0.0145	0.0146667	-0.008	-0.0128333	-0.0376667	-0.0115
20.5		323.04	321.92	324.16	333.62	326.24															-1.24	0			-1.25	-0.031	-0.0094919	-0.00590909	0.01625	0.03375	-0.0235	-0.0235	0.104444	-0.00142857	-0.0105	-0.00483333	-0.0283333	0.0301667	-0.00483333	-0.0218333	0.0095	-0.0025	-0.0145	0.0146667	-0.008	-0.0128333	-0.00433333	-0.0115
21		325.4	325.88	314.62	345.7	321.16															-1.23	2			-1.24	-0.031	-0.0094919	-0.00590909	-0.04625	0.117083	-0.0235	-0.0235	-0.00666667	-0.00142857	-0.0105	-0.00483333	-0.0283333	-0.00316667	-0.00483333	0.0448333	-0.0238333	-0.0025	0.0521667	0.048	-0.008	-0.0128333	-0.00433333	-0.0115
21.5		324.78	319.44	325.5	340.8	321.32															-1.22	1			-1.23	-0.031	-0.0094919	-0.00590909	0.01625	0.03375	-0.0235	-0.0235	-0.00666667	-0.00142857	0.0145	-0.00483333	0.0716667	-0.00316667	-0.00483333	0.0115	-0.0905	-0.0025	-0.0145	0.0813333	0.0253333	-0.0128333	-0.0376667	-0.0115
22		323.88	322.78	338.64	326.68	327.78															-1.21	0			-1.22	0.169	-0.0094919	-0.00590909	0.01625	-0.0495833	-0.0235	-0.0235	-0.00666667	-0.00142857	-0.0105	-0.00483333	-0.0616667	-0.00316667	-0.00483333	0.0448333	0.0095	-0.0025	-0.0145	-0.0186667	0.0253333	-0.0128333	0.0956667	0.0218333
22.5		329.2	322.78	317.7	323.04	326.64															-1.2	0			-1.21	-0.031	-0.0094919	-0.00590909	0.07875	-0.0495833	-0.0235	-0.0235	-0.00666667	-0.00142857	0.0145	-0.00483333	0.005	-0.00316667	-0.00483333	0.0115	0.0095	-0.0025	-0.0145	0.048	-0.008	0.0205	-0.00433333	0.0218333
23		331.24	329.56	327.8	320.6	324.32															-1.19	0			-1.2	-0.031	-0.0094919	-0.00590909	0.07875	-0.0495833	-0.0235	-0.0235	-0.00666667	-0.00142857	-0.0105	-0.00483333	0.0716667	-0.00316667	-0.00483333	-0.0218333	-0.0238333	-0.0025	-0.0145	-0.0186667	-0.008	-0.0128333	0.029	-0.0115
23.5		322	333.28	340	317.72	328.2															-1.18	0			-1.19	0.169	-0.0094919	-0.00590909	-0.04625	-0.0495833	-0.0235	-0.0235	-0.00666667	-0.00142857	0.0145	-0.00483333	0.005	-0.00316667	-0.00483333	0.0115	0.0428333	-0.0025	-0.0145	-0.0186667	-0.008	-0.0128333	-0.00433333	-0.0115
24		329.18	330.24	325.62	321.46	317.78															-1.17	0			-1.18	-0.031	-0.0094919	0.085	0.01625	0.03375	-0.0235	-0.0235	-0.00666667	-0.00142857	-0.0105	-0.00483333	-0.0283333	-0.00316667	0.0285	0.0115	0.0095	-0.0025	-0.0145	-0.0186667	0.0253333	0.0205	-0.0376667	0.0218333
24.5		317.76	320.72	335.38	319.66	324.58															-1.16	1			-1.17	-0.031	-0.0094919	-0.00590909	-0.04625	-0.0495833	0.0765	0.0765	-0.00666667	-0.00142857	0.0145	-0.00483333	0.0383333	-0.00316667	-0.00483333	0.0115	0.0095	-0.0025	-0.0145	-0.0186667	-0.008	-0.0128333	0.029	-0.0115
25		313.52	318.12	340.48	324.08	325.34															-1.15	1			-1.16	-0.031	-0.0094919	0.085	0.07875	0.03375	-0.0235	-0.0235	-0.00666667	-0.00142857	-0.0105	-0.00483333	0.0383333	-0.00316667	0.0285	0.0115	-0.0238333	-0.0025	0.0188333	0.0146667	-0.008	0.0205	-0.00433333	-0.0115
25.5		321.38	321.36	335.72	322.1	341.46															-1.14	0			-1.15	-0.031	-0.0094919	0.085	-0.04625	0.03375	-0.0235	-0.0235	-0.00666667	-0.00142857	-0.0105	-0.00483333	0.0383333	-0.00316667	0.0618333	0.0115	0.0428333	-0.0025	0.0188333	-0.0186667	0.0253333	-0.0128333	-0.00433333	-0.0115
26		315.18	323.56	324.88	318.841	338.84															-1.13	2			-1.14	-0.031	-0.0094919	-0.00590909	0.01625	0.03375	-0.0235	-0.0235	-0.00666667	-0.00142857	0.0145	-0.00483333	-0.0283333	-0.00316667	-0.00483333	-0.0218333	-0.0571667	-0.0025	0.0188333	0.0146667	-0.008	-0.0128333	-0.00433333	-0.0115
26.5		320.82	327.24	323	315.14	335.82															-1.12	0			-1.13	-0.031	-0.0094919	-0.00590909	0.07875	0.03375	-0.0235	-0.0235	-0.00666667	-0.00142857	-0.0105	-0.00483333	0.005	-0.00316667	-0.00483333	-0.0218333	0.0428333	-0.0025	-0.0145	-0.0186667	-0.008	-0.0128333	-0.00433333	0.0218333
27		313.82	334.62	319.8	322.08	327.4															-1.11	0			-1.12	0.169	-0.0094919	-0.00590909	0.01625	0.03375	0.0765	0.0765	-0.00666667	-0.00142857	-0.0105	0.0285	-0.0283333	-0.00316667	-0.00483333	-0.0218333	0.0095	-0.0025	-0.0145	-0.0186667	-0.008	0.0205	-0.0376667	0.0551667
27.5		320.4	333.76	322.48	320.26	326.92															-1.1	0			-1.11	0.169	-0.0094919	0.085	0.01625	0.03375	-0.0235	-0.0235	-0.00666667	-0.00142857	-0.0105	-0.00483333	0.005	0.0301667	-0.00483333	-0.0218333	-0.0238333	-0.0025	-0.0145	-0.0186667	-0.008	-0.0128333	-0.0376667	-0.0115
28		321.64	314.08	324.36	321.98	328.94															-1.09	0			-1.1	-0.031	-0.0094919	-0.00590909	0.01625	-0.0495833	-0.0235	-0.0235	-0.00666667	-0.00142857	-0.0105	-0.00483333	0.0716667	-0.00316667	-0.00483333	-0.0218333	0.0428333	-0.0025	-0.0145	-0.0186667	-0.008	0.0538333	-0.0376667	-0.0115
28.5		311.96	318.16	327.38	318.22	315.44															-1.08	0			-1.09	-0.031	-0.0094919	-0.00590909	-0.04625	-0.0495833	-0.0235	-0.0235	-0.00666667	-0.00142857	-0.0105	-0.00483333	0.0383333	-0.00316667	-0.00483333	0.0781667	0.1095	-0.0025	-0.0145	-0.0186667	-0.008	-0.0128333	-0.00433333	0.0218333
29		311.82	314.8	324.8	316.32	316.06															-1.07	0			-1.08	-0.031	-0.0094919	-0.00590909	0.07875	-0.0495833	-0.0235	-0.0235	-0.00666667	-0.00142857	0.0145	-0.00483333	0.0383333	-0.00316667	-0.00483333	-0.0218333	0.0095	-0.0025	0.0188333	0.0146667	0.0253333	-0.0128333	-0.0376667	-0.0115
29.5		310.12	315.18	320.26	318.14	319.4															-1.06	0			-1.07	-0.031	-0.0094919	-0.00590909	0.01625	0.200417	-0.0235	-0.0235	-0.00666667	-0.00142857	0.0145	-0.00483333	-0.0283333	-0.00316667	-0.00483333	0.0115	-0.0238333	-0.0025	0.0521667	0.0146667	-0.008	0.0871667	0.0623333	0.0218333
30	shock, 0.3 mA	312.86	316.62	320	321.76	324.48															-1.05	1			-1.06	0.169	-0.0094919	-0.00590909	0.01625	-0.0495833	0.0765	0.0765	-0.00666667	-0.00142857	-0.0105	-0.00483333	-0.0283333	-0.00316667	-0.00483333	-0.0218333	-0.0238333	-0.0025	-0.0145	0.0146667	0.0253333	-0.0128333	0.0623333	-0.0115
30.5	shock, 0.3 mA	313.06	313.46	310.699	323.3	319.92															-1.04	2			-1.05	-0.031	-0.0094919	-0.00590909	0.01625	-0.0495833	-0.0235	-0.0235	0.104444	-0.00142857	-0.0105	-0.00483333	0.005	-0.00316667	-0.00483333	0.0115	0.0428333	-0.0025	-0.0145	0.0146667	-0.008	-0.0128333	0.029	0.0218333
31	shock, 0.3 mA	317.48	311.22	309.92	313.5	326.78															-1.03	0			-1.04	-0.031	-0.0094919	-0.00590909	0.01625	0.03375	0.1765	0.1765	-0.00666667	-0.00142857	-0.0105	-0.00483333	-0.0283333	-0.00316667	0.0285	-0.0218333	0.0428333	-0.0025	-0.0145	-0.0186667	-0.008	0.0205	-0.0376667	-0.0115
31.5	shock, 0.3 mA	339.96	339.74	332.24	326.24	355.039															-1.02	0			-1.03	-0.031	-0.0094919	-0.00590909	0.01625	0.03375	-0.0235	-0.0235	-0.00666667	-0.00142857	-0.0105	-0.00483333	0.005	-0.00316667	-0.00483333	0.0115	0.0428333	-0.0025	-0.0145	-0.0186667	-0.008	-0.0128333	-0.0376667	0.0218333
32	shock, 0.3 mA	364.64	368.7	369.26	349.6	376.88															-1.01	0			-1.02	0.169	0.101619	-0.00590909	0.01625	0.03375	-0.0235	-0.0235	-0.00666667	-0.00142857	0.0145	-0.00483333	0.0383333	-0.00316667	0.0285	0.0115	0.0761667	-0.0025	0.0855	-0.0186667	-0.008	-0.0128333	-0.00433333	-0.0115
32.5	shock, 0.3 mA	373.5	380.62	379.22	375.06	386.64															-1	0			-1.01	-0.031	-0.0094919	-0.00590909	0.01625	0.03375	-0.0235	-0.0235	-0.00666667	-0.00142857	-0.0105	-0.00483333	-0.0283333	-0.00316667	-0.00483333	-0.0218333	-0.0571667	-0.0025	0.0521667	0.0146667	-0.008	0.0205	-0.0376667	0.0551667
33	shock, 0.3 mA	367.78	381.74	387.58	379.94	391.46															-0.99	2			-1	-0.031	-0.0094919	-0.00590909	-0.04625	-0.0495833	-0.0235	-0.0235	-0.00666667	-0.00142857	-0.0105	-0.00483333	0.005	-0.00316667	-0.00483333	-0.0218333	-0.0238333	-0.0025	-0.0145	-0.0186667	-0.008	-0.0128333	0.0623333	-0.0115
33.5		376.14	365.9	379.08	383.539	390.92															-0.98	0			-0.99	-0.031	-0.0094919	-0.00590909	-0.04625	-0.0495833	-0.0235	-0.0235	-0.00666667	-0.00142857	-0.0105	-0.00483333	-0.0616667	-0.00316667	-0.00483333	-0.0218333	0.0095	-0.0025	-0.0145	-0.0186667	-0.008	-0.0128333	0.029	-0.0115
34		376.52	366.62	372.82	363.92	397.62															-0.97	1			-0.98	-0.031	-0.0094919	-0.00590909	0.01625	0.117083	-0.0235	-0.0235	-0.00666667	-0.00142857	-0.0105	-0.00483333	0.005	-0.00316667	-0.00483333	0.0115	-0.0238333	-0.0025	-0.0145	-0.0186667	-0.008	0.0205	-0.00433333	-0.0115
34.5		361.68	364.46	355.54	374.4	377.2															-0.96	0			-0.97	-0.031	-0.0094919	0.085	0.01625	-0.0495833	-0.0235	-0.0235	-0.00666667	-0.00142857	-0.0105	-0.00483333	-0.0616667	-0.00316667	-0.00483333	0.0115	0.0428333	-0.0025	0.0521667	-0.0186667	-0.008	-0.0128333	-0.0376667	-0.0115
35		336.74	359.86	363.5	380.92	365.839															-0.95	1			-0.96	-0.031	-0.0094919	-0.00590909	-0.04625	-0.0495833	-0.0235	-0.0235	-0.00666667	-0.00142857	-0.0105	-0.00483333	0.005	-0.00316667	-0.00483333	0.0115	0.0095	-0.0025	-0.0145	0.048	0.0253333	0.0205	0.029	-0.0115
35.5		341.36	349.2	359.86	370.8	386.06															-0.94	0			-0.95	-0.031	-0.0094919	-0.00590909	0.01625	0.03375	0.0765	0.0765	-0.00666667	-0.00142857	-0.0105	-0.00483333	-0.0283333	-0.00316667	-0.00483333	0.0115	0.0095	-0.0025	-0.0145	0.0146667	-0.008	-0.0128333	-0.0376667	-0.0115
36		337.52	350.32	353.62	370.86	368.859															-0.93	0			-0.94	-0.031	-0.0094919	-0.00590909	-0.04625	0.03375	-0.0235	-0.0235	-0.00666667	-0.00142857	-0.0105	-0.00483333	-0.0616667	-0.00316667	0.0285	0.0115	0.0761667	-0.0025	0.0188333	0.0146667	-0.008	-0.0128333	-0.00433333	-0.0115
36.5		329.66	332.74	355.86	366.4	348.1															-0.92	1			-0.93	-0.031	-0.0094919	-0.00590909	-0.04625	-0.0495833	-0.0235	-0.0235	-0.00666667	-0.00142857	-0.0105	-0.00483333	0.005	-0.00316667	-0.00483333	0.0115	0.0095	-0.0025	0.0521667	0.0146667	0.0253333	-0.0128333	0.0623333	0.0218333
37		332.32	337.28	340.56	341.98	341.699															-0.91	0			-0.92	-0.031	0.101619	-0.00590909	0.07875	0.03375	-0.0235	-0.0235	-0.00666667	-0.00142857	-0.0105	-0.00483333	0.0716667	-0.00316667	-0.00483333	-0.0218333	0.0761667	-0.0025	-0.0145	0.0146667	-0.008	-0.0128333	-0.00433333	0.0218333
37.5		328.88	327.04	343.68	355.02	343															-0.9	1			-0.91	-0.031	-0.0094919	-0.00590909	0.01625	0.03375	-0.0235	-0.0235	-0.00666667	-0.00142857	0.0145	-0.00483333	-0.0283333	-0.00316667	-0.00483333	-0.0218333	0.142833	-0.0025	0.0521667	-0.0186667	0.0253333	-0.0128333	-0.0376667	0.0551667
38		325.04	331.4	339.4	339.04	346.28															-0.89	0			-0.9	-0.031	-0.0094919	-0.00590909	0.01625	-0.0495833	0.0765	0.0765	-0.00666667	-0.00142857	-0.0105	-0.00483333	-0.0616667	-0.00316667	-0.00483333	0.0115	0.1095	-0.0025	-0.0145	-0.0186667	-0.008	-0.0128333	-0.00433333	-0.0115
38.5		324.56	332.2	334.18	335.84	342.84															-0.88	0			-0.89	-0.031	0.101619	-0.00590909	0.07875	0.117083	-0.0235	-0.0235	-0.00666667	-0.00142857	0.0145	-0.00483333	0.0383333	-0.00316667	-0.00483333	-0.0218333	-0.0238333	-0.0025	-0.0145	-0.0186667	-0.008	0.0205	0.0623333	-0.0115
39		319.66	328.06	326.2	345.4	347.859															-0.87	0			-0.88	-0.031	-0.0094919	-0.00590909	-0.04625	-0.0495833	-0.0235	-0.0235	0.104444	-0.00142857	0.0145	-0.00483333	0.005	-0.00316667	-0.00483333	-0.0218333	-0.0238333	-0.0025	-0.0145	0.0146667	-0.008	-0.0128333	0.029	-0.0115
39.5		314.18	323.14	332.3	325.22	346.2															-0.86	1			-0.87	-0.031	-0.0094919	-0.00590909	0.01625	0.03375	-0.0235	-0.0235	-0.00666667	-0.00142857	-0.0105	-0.00483333	0.0383333	-0.00316667	-0.00483333	0.0115	0.0095	-0.0025	-0.0145	-0.0186667	-0.008	-0.0128333	-0.00433333	0.0218333
40		319.88	330.36	325.421	337.64	339.219															-0.85	0			-0.86	-0.031	-0.0094919	-0.00590909	0.14125	0.117083	-0.0235	-0.0235	-0.00666667	-0.00142857	-0.0105	-0.00483333	-0.0283333	-0.00316667	-0.00483333	0.0115	0.0095	-0.0025	-0.0145	-0.0186667	-0.008	0.0205	-0.0376667	-0.0115
40.5		320.74	329.5	323.361	334.08	342.44															-0.84	1			-0.85	-0.031	-0.0094919	-0.00590909	0.01625	-0.0495833	-0.0235	-0.0235	-0.00666667	-0.00142857	-0.0105	-0.00483333	0.005	-0.00316667	-0.00483333	-0.0218333	0.0428333	-0.0025	-0.0145	-0.0186667	-0.008	-0.0128333	-0.00433333	0.0218333
41		325.78	329.72	318.58	337.84	328.22															-0.83	0			-0.84	-0.031	-0.0094919	-0.00590909	-0.04625	0.117083	-0.0235	-0.0235	-0.00666667	-0.00142857	-0.0105	-0.00483333	0.005	-0.00316667	-0.00483333	0.0115	0.0095	-0.0025	-0.0145	0.0146667	0.0586667	-0.0128333	0.029	-0.0115
41.5		328.72	323.38	321.84	342.8	347.139															-0.82	1			-0.83	0.169	-0.0094919	-0.00590909	-0.04625	-0.0495833	-0.0235	-0.0235	-0.00666667	-0.00142857	-0.0105	0.0285	-0.0283333	0.0301667	-0.00483333	-0.0218333	-0.0238333	-0.0025	0.0188333	-0.0186667	-0.008	0.0205	0.029	-0.0115
42		322.86	328.08	320.3	347.08	352.179															-0.81	0			-0.82	0.169	-0.0094919	-0.00590909	0.01625	-0.0495833	-0.0235	-0.0235	-0.00666667	-0.00142857	-0.0105	-0.00483333	-0.0283333	-0.00316667	-0.00483333	-0.0218333	-0.0571667	-0.0025	-0.0145	-0.0186667	-0.008	-0.0128333	0.029	-0.0115
42.5		318.44	323.68	318.24	353.94	352.079															-0.8	0			-0.81	-0.031	-0.0094919	-0.00590909	0.01625	-0.0495833	0.0765	0.0765	-0.00666667	-0.00142857	0.0145	-0.00483333	-0.0283333	-0.00316667	-0.00483333	0.0115	0.0761667	-0.0025	-0.0145	-0.0186667	-0.008	0.0205	-0.0376667	-0.0115
43		318.74	320.7	321.96	329.5	342.38															-0.79	0			-0.8	-0.031	-0.0094919	-0.00590909	-0.04625	0.117083	0.0765	0.0765	-0.00666667	-0.00142857	0.0145	-0.00483333	-0.0283333	-0.00316667	-0.00483333	0.0115	0.0095	-0.0025	-0.0145	0.0146667	-0.008	-0.0128333	-0.00433333	0.0218333
43.5		313.7	320.16	321.28	337.82	362.22															-0.78	0			-0.79	-0.031	0.101619	-0.00590909	0.01625	0.117083	-0.0235	-0.0235	-0.00666667	-0.00142857	-0.0105	-0.00483333	-0.0283333	0.0301667	-0.00483333	-0.0218333	-0.0238333	-0.0025	-0.0145	0.0146667	-0.008	0.0205	-0.0376667	-0.0115
44		308.24	314.14	317.72	339.74	350.58															-0.77	0			-0.78	0.169	-0.0094919	-0.00590909	0.01625	-0.0495833	-0.0235	-0.0235	-0.00666667	-0.00142857	0.0145	-0.00483333	0.005	-0.00316667	-0.00483333	-0.0218333	-0.0238333	-0.0025	-0.0145	0.0146667	0.0253333	0.0205	-0.0376667	-0.0115
44.5		318.42	331.3	320.24	328.82	335.5															-0.76	0			-0.77	-0.031	-0.0094919	-0.00590909	0.14125	-0.0495833	-0.0235	-0.0235	-0.00666667	-0.00142857	-0.0105	-0.00483333	0.005	-0.00316667	-0.00483333	-0.0218333	-0.0571667	-0.0025	-0.0145	-0.0186667	0.0253333	-0.0128333	0.029	0.0218333
45		322.96	351.4	325.76	334.52	339.08															-0.75	1			-0.76	-0.031	-0.0094919	-0.00590909	-0.04625	-0.0495833	-0.0235	-0.0235	-0.00666667	-0.00142857	0.0145	0.0285	0.0383333	-0.00316667	-0.00483333	0.0115	0.0095	-0.0025	-0.0145	-0.0186667	-0.008	0.0205	-0.0376667	-0.0115
45.5		316.8	335.84	318.86	345.4	337.54															-0.74	0			-0.75	-0.031	-0.0094919	-0.00590909	0.07875	0.03375	-0.0235	-0.0235	-0.00666667	-0.00142857	-0.0105	-0.00483333	-0.0283333	-0.00316667	-0.00483333	-0.0218333	0.0095	-0.0025	-0.0145	-0.0186667	-0.008	0.0538333	0.029	-0.0115
46		315.08	340.68	315.84	334.02	334.32															-0.73	1			-0.74	-0.031	-0.0094919	-0.00590909	-0.04625	-0.0495833	-0.0235	-0.0235	-0.00666667	-0.00142857	-0.0105	-0.00483333	-0.0616667	-0.00316667	-0.00483333	0.0115	-0.0238333	-0.0025	0.0188333	-0.0186667	-0.008	-0.0128333	-0.0376667	0.0218333
46.5		326.36	337.6	316.7	324.88	319.3															-0.72	2			-0.73	-0.031	-0.0094919	-0.00590909	-0.04625	0.117083	-0.0235	-0.0235	-0.00666667	-0.00142857	-0.0105	-0.00483333	0.105	-0.00316667	-0.00483333	0.0115	-0.0571667	-0.0025	-0.0145	0.048	0.0586667	0.0871667	-0.0376667	-0.0115
47		325.56	330.88	324.96	322.44	345.1															-0.71	0			-0.72	-0.031	-0.0094919	-0.00590909	0.01625	-0.0495833	-0.0235	-0.0235	-0.00666667	-0.00142857	-0.0105	-0.00483333	-0.0283333	-0.00316667	0.0285	-0.0218333	-0.0238333	-0.0025	-0.0145	-0.0186667	-0.008	-0.0128333	0.0623333	0.0218333
47.5		324.58	321.56	336.94	332.66	326.54															-0.7	0			-0.71	-0.031	-0.0094919	-0.00590909	0.01625	0.117083	-0.0235	-0.0235	-0.00666667	-0.00142857	0.0145	-0.00483333	0.005	-0.00316667	-0.00483333	0.0448333	-0.0571667	-0.0025	-0.0145	-0.0186667	-0.008	-0.0128333	-0.0376667	-0.0115
48		329.48	323.48	332.7	339.72	334.18															-0.69	1			-0.7	-0.031	-0.0094919	-0.00590909	-0.04625	-0.0495833	-0.0235	-0.0235	-0.00666667	-0.00142857	-0.0105	-0.00483333	0.005	-0.00316667	-0.00483333	0.0448333	0.0428333	-0.0025	0.0188333	0.0146667	-0.008	0.0205	0.029	-0.0115
48.5		321.38	326.92	335	329.36	342.18															-0.68	2			-0.69	-0.031	-0.0094919	-0.00590909	-0.04625	0.117083	-0.0235	-0.0235	-0.00666667	-0.00142857	0.0145	-0.00483333	-0.0283333	-0.00316667	-0.00483333	-0.0218333	-0.0571667	-0.0025	-0.0145	0.0146667	-0.008	-0.0128333	-0.0376667	-0.0115
49		329	307.84	333.72	311.921	340.14															-0.67	0			-0.68	-0.031	0.101619	-0.00590909	-0.04625	0.03375	-0.0235	-0.0235	-0.00666667	-0.00142857	-0.0105	-0.00483333	0.0383333	-0.00316667	-0.00483333	-0.0218333	-0.0238333	-0.0025	-0.0145	-0.0186667	-0.008	0.0205	-0.0376667	0.0551667
49.5		324.9	308.94	333.12	320.86	335.76															-0.66	1			-0.67	-0.031	-0.0094919	-0.00590909	-0.04625	-0.0495833	0.1765	0.1765	-0.00666667	-0.00142857	0.0145	-0.00483333	-0.0616667	-0.00316667	-0.00483333	0.0115	-0.0571667	-0.0025	-0.0145	0.0813333	0.0253333	0.0205	0.029	-0.0115
50		326.1	314.58	331.66	335.8	337.5															-0.65	0			-0.66	-0.031	-0.0094919	-0.00590909	0.01625	0.117083	-0.0235	-0.0235	0.104444	-0.00142857	-0.0105	-0.00483333	-0.0616667	-0.00316667	0.0285	0.0448333	-0.0571667	-0.0025	-0.0145	-0.0186667	0.0253333	-0.0128333	0.0623333	0.0218333
50.5		324.92	318.64	336.02	326.3	341.179															-0.64	0			-0.65	-0.031	-0.0094919	-0.00590909	-0.04625	-0.0495833	0.0765	0.0765	-0.00666667	-0.00142857	0.0395	-0.00483333	0.0383333	-0.00316667	-0.00483333	-0.0218333	-0.0238333	-0.0025	-0.0145	0.048	-0.008	0.0205	-0.00433333	-0.0115
51		325.221	315.76	323.14	312.801	320.74															-0.63	1			-0.64	-0.031	-0.0094919	-0.00590909	-0.04625	-0.0495833	-0.0235	-0.0235	-0.00666667	-0.00142857	0.0395	-0.00483333	0.0383333	-0.00316667	0.0285	0.0115	-0.0905	-0.0025	-0.0145	-0.0186667	-0.008	-0.0128333	-0.00433333	-0.0115
51.5		324.78	318.42	320.08	312.76	328.42															-0.62	1			-0.63	0.369	-0.0094919	-0.00590909	-0.04625	-0.0495833	-0.0235	-0.0235	-0.00666667	-0.00142857	0.0395	-0.00483333	0.005	-0.00316667	-0.00483333	-0.0218333	-0.0238333	-0.0025	0.0521667	0.0146667	-0.008	-0.0128333	-0.0376667	-0.0115
52		323.12	330.68	328.92	314.86	340.46															-0.61	0			-0.62	-0.031	-0.0094919	-0.00590909	0.01625	-0.0495833	-0.0235	-0.0235	-0.00666667	-0.00142857	0.0145	-0.00483333	-0.0616667	-0.00316667	-0.00483333	-0.0218333	0.0095	-0.0025	-0.0145	-0.0186667	-0.008	0.0205	-0.00433333	-0.0115
52.5		322.44	324.18	317.82	319.4	342.479															-0.6	1			-0.61	-0.031	-0.0094919	-0.00590909	0.07875	0.117083	-0.0235	-0.0235	-0.00666667	-0.00142857	0.0645	0.0285	0.005	-0.00316667	-0.00483333	0.1115	-0.0571667	-0.0025	-0.0145	0.0146667	-0.008	-0.0128333	-0.0376667	-0.0115
53		318.76	315.96	315.06	328.1	340.24															-0.59	1			-0.6	-0.031	-0.0094919	-0.00590909	0.01625	-0.0495833	-0.0235	-0.0235	-0.00666667	-0.00142857	-0.0105	-0.00483333	0.005	-0.00316667	-0.00483333	-0.0218333	-0.0571667	-0.0025	-0.0145	-0.0186667	0.0253333	-0.0128333	0.029	-0.0115
53.5		316.08	309.02	319.32	322.94	335.26															-0.58	1			-0.59	-0.031	-0.0094919	-0.00590909	0.07875	-0.0495833	0.0765	0.0765	-0.00666667	-0.00142857	0.0145	0.0285	0.0383333	-0.00316667	-0.00483333	-0.0218333	-0.0571667	-0.0025	0.0188333	-0.0186667	-0.008	-0.0128333	0.029	-0.0115
54		332.5	307.62	319.34	337.26	315.86															-0.57	1			-0.58	-0.031	-0.0094919	-0.00590909	-0.04625	-0.0495833	-0.0235	-0.0235	-0.00666667	-0.00142857	0.0145	-0.00483333	0.0383333	-0.00316667	0.0285	0.0115	-0.0905	-0.0025	0.0521667	0.0146667	-0.008	-0.0128333	-0.00433333	-0.0115
54.5		330.92	306.76	322.1	314.92	316.04															-0.56	0			-0.57	-0.031	-0.0094919	-0.00590909	0.07875	-0.0495833	-0.0235	-0.0235	-0.00666667	-0.00142857	-0.0105	-0.00483333	0.005	-0.00316667	-0.00483333	-0.0218333	-0.0905	-0.0025	-0.0145	-0.0186667	0.0253333	-0.0128333	-0.0376667	0.0218333
55		320.12	319.94	317.88	320.16	313.4															-0.55	0			-0.56	-0.031	-0.0094919	-0.00590909	-0.04625	0.03375	0.0765	0.0765	-0.00666667	-0.00142857	0.0145	-0.00483333	0.0383333	-0.00316667	-0.00483333	-0.0218333	-0.0905	-0.0025	-0.0145	-0.0186667	0.0253333	-0.0128333	0.029	-0.0115
55.5		327.96	321.06	324.22	316.58	315															-0.54	0			-0.55	-0.031	-0.0094919	-0.00590909	0.01625	-0.0495833	-0.0235	-0.0235	-0.00666667	-0.00142857	0.0395	-0.00483333	-0.0283333	-0.00316667	-0.00483333	-0.0218333	-0.0571667	-0.0025	-0.0145	-0.0186667	-0.008	0.0205	-0.0376667	-0.0115
56		327.06	316.16	328.58	325.54	317.52															-0.53	1			-0.54	-0.031	-0.0094919	-0.00590909	-0.04625	-0.0495833	-0.0235	-0.0235	-0.00666667	-0.00142857	0.0395	-0.00483333	-0.0616667	-0.00316667	-0.00483333	-0.0218333	-0.0571667	-0.0025	-0.0145	-0.0186667	-0.008	-0.0128333	-0.0376667	-0.0115
56.5		331.1	315.12	321.96	328.36	328.48															-0.52	0			-0.53	-0.031	-0.0094919	-0.00590909	-0.04625	-0.0495833	-0.0235	-0.0235	-0.00666667	-0.00142857	0.0145	-0.00483333	-0.0283333	-0.00316667	-0.00483333	-0.0218333	0.0095	-0.0025	-0.0145	-0.0186667	-0.008	-0.0128333	-0.00433333	0.0218333
57		330.2	318.6	329.06	330.48	334.66															-0.51	1			-0.52	0.169	-0.0094919	-0.00590909	-0.04625	-0.0495833	-0.0235	-0.0235	-0.00666667	-0.00142857	-0.0105	-0.00483333	-0.0283333	-0.00316667	-0.00483333	0.0115	-0.0238333	-0.0025	-0.0145	0.0146667	0.0253333	-0.0128333	0.029	-0.0115
57.5		331.36	318.38	331.34	333.28	328.34															-0.5	0			-0.51	-0.031	-0.0094919	-0.00590909	0.07875	-0.0495833	-0.0235	-0.0235	-0.00666667	-0.00142857	-0.0105	-0.00483333	0.0383333	-0.00316667	-0.00483333	-0.0218333	0.0095	-0.0025	-0.0145	-0.0186667	-0.008	-0.0128333	0.0623333	0.0218333
58		313.58	327.88	323.14	331.02	324.56															-0.49	0			-0.5	-0.031	-0.0094919	-0.00590909	0.01625	0.117083	-0.0235	-0.0235	-0.00666667	-0.00142857	-0.0105	-0.00483333	0.0716667	-0.00316667	-0.00483333	-0.0218333	-0.0571667	-0.0025	-0.0145	-0.0186667	-0.008	-0.0128333	0.029	-0.0115
58.5		321.76	327.44	329.56	329.02	328.9															-0.48	1			-0.49	-0.031	-0.0094919	-0.00590909	0.07875	-0.0495833	-0.0235	-0.0235	-0.00666667	-0.00142857	-0.0105	-0.00483333	-0.0616667	0.0301667	-0.00483333	0.0781667	-0.0238333	-0.0025	-0.0145	0.0146667	-0.008	-0.0128333	-0.00433333	-0.0115
59		322.26	334.6	326.74	327.82	328.08															-0.47	1			-0.48	-0.031	-0.0094919	-0.00590909	0.01625	0.03375	-0.0235	-0.0235	-0.00666667	-0.00142857	-0.0105	-0.00483333	-0.0283333	0.0301667	0.0285	-0.0218333	0.0095	-0.0025	-0.0145	0.0146667	0.0253333	0.0538333	-0.0376667	-0.0115
59.5		326.82	334.68	327.36	340.18	331.86															-0.46	0			-0.47	-0.031	-0.0094919	-0.00590909	-0.04625	-0.0495833	-0.0235	-0.0235	-0.00666667	-0.00142857	-0.0105	-0.00483333	0.005	0.0301667	-0.00483333	-0.0218333	-0.0238333	-0.0025	-0.0145	0.114667	-0.008	0.0205	-0.00433333	-0.0115
																					-0.45	2			-0.46	-0.031	-0.0094919	-0.00590909	0.01625	0.03375	0.0765	0.0765	-0.00666667	-0.00142857	-0.0105	-0.00483333	-0.0283333	0.0301667	-0.00483333	-0.0218333	0.0095	-0.0025	-0.0145	0.048	-0.008	0.0205	-0.0376667	-0.0115
																					-0.44	1			-0.45	0.169	-0.0094919	-0.00590909	-0.04625	-0.0495833	0.0765	0.0765	-0.00666667	-0.00142857	-0.0105	-0.00483333	0.005	-0.00316667	-0.00483333	0.0115	0.0761667	-0.0025	-0.0145	-0.0186667	0.0253333	-0.0128333	0.0623333	-0.0115
																					-0.43	0			-0.44	-0.031	0.101619	-0.00590909	0.01625	0.117083	-0.0235	-0.0235	0.104444	-0.00142857	0.0145	-0.00483333	-0.0616667	-0.00316667	-0.00483333	0.0448333	-0.0238333	-0.0025	-0.0145	-0.0186667	-0.008	-0.0128333	-0.00433333	0.0551667
																					-0.42	0			-0.43	-0.031	-0.0094919	-0.00590909	-0.04625	0.03375	-0.0235	-0.0235	-0.00666667	-0.00142857	0.0145	-0.00483333	-0.0283333	-0.00316667	-0.00483333	-0.0218333	0.0095	-0.0025	-0.0145	-0.0186667	-0.008	0.0205	-0.00433333	-0.0115
																					-0.41	0			-0.42	0.169	-0.0094919	-0.00590909	0.01625	-0.0495833	0.1765	0.1765	-0.00666667	-0.00142857	-0.0105	-0.00483333	-0.0283333	-0.00316667	-0.00483333	-0.0218333	-0.0905	-0.0025	0.0188333	-0.0186667	-0.008	-0.0128333	-0.00433333	-0.0115
																					-0.4	0			-0.41	0.169	-0.0094919	-0.00590909	-0.04625	-0.0495833	-0.0235	-0.0235	-0.00666667	-0.00142857	-0.0105	-0.00483333	0.105	-0.00316667	-0.00483333	0.1115	0.0095	-0.0025	-0.0145	-0.0186667	0.0253333	-0.0128333	-0.00433333	-0.0115
																					-0.39	0			-0.4	-0.031	-0.0094919	-0.00590909	0.01625	-0.0495833	-0.0235	-0.0235	-0.00666667	-0.00142857	-0.0105	-0.00483333	0.105	-0.00316667	-0.00483333	-0.0218333	0.0095	-0.0025	-0.0145	0.0146667	-0.008	-0.0128333	-0.00433333	-0.0115
																					-0.38	0			-0.39	-0.031	-0.0094919	-0.00590909	0.14125	0.03375	-0.0235	-0.0235	-0.00666667	-0.00142857	-0.0105	-0.00483333	-0.0616667	-0.00316667	-0.00483333	0.0115	0.0428333	-0.0025	-0.0145	-0.0186667	0.0253333	0.0538333	-0.0376667	-0.0115
																					-0.37	0			-0.38	-0.031	-0.0094919	-0.00590909	-0.04625	-0.0495833	-0.0235	-0.0235	-0.00666667	-0.00142857	-0.0105	-0.00483333	0.005	-0.00316667	-0.00483333	-0.0218333	-0.0238333	-0.0025	-0.0145	-0.0186667	-0.008	-0.0128333	0.0623333	0.0218333
																					-0.36	0			-0.37	-0.031	-0.0094919	-0.00590909	0.01625	-0.0495833	-0.0235	-0.0235	-0.00666667	-0.00142857	-0.0105	-0.00483333	-0.0283333	-0.00316667	-0.00483333	-0.0218333	-0.0238333	-0.0025	-0.0145	0.048	0.0253333	-0.0128333	-0.0376667	-0.0115
																					-0.35	0			-0.36	-0.031	-0.0094919	-0.00590909	0.01625	-0.0495833	-0.0235	-0.0235	-0.00666667	-0.00142857	-0.0105	-0.00483333	-0.0283333	-0.00316667	-0.00483333	-0.0218333	0.0761667	0.0308333	-0.0145	-0.0186667	0.0253333	0.0205	-0.00433333	-0.0115
																					-0.34	0			-0.35	-0.031	0.101619	-0.00590909	0.07875	-0.0495833	-0.0235	-0.0235	-0.00666667	-0.00142857	-0.0105	-0.00483333	0.105	-0.00316667	-0.00483333	0.0448333	0.0095	-0.0025	-0.0145	0.0146667	-0.008	-0.0128333	0.029	-0.0115
																					-0.33	0			-0.34	-0.031	-0.0094919	-0.00590909	-0.04625	0.03375	-0.0235	-0.0235	-0.00666667	-0.00142857	-0.0105	-0.00483333	-0.0283333	-0.00316667	-0.00483333	0.0115	-0.0238333	0.0308333	0.0521667	-0.0186667	-0.008	0.0205	-0.0376667	-0.0115
																					-0.32	0			-0.33	-0.031	-0.0094919	-0.00590909	0.07875	-0.0495833	-0.0235	-0.0235	-0.00666667	-0.00142857	0.0145	0.0285	-0.0283333	-0.00316667	-0.00483333	0.0115	0.0761667	-0.0025	-0.0145	0.0146667	-0.008	-0.0128333	0.0623333	-0.0115
																					-0.31	0			-0.32	0.169	-0.0094919	-0.00590909	0.01625	0.03375	-0.0235	-0.0235	-0.00666667	-0.00142857	-0.0105	0.0285	-0.0283333	-0.00316667	-0.00483333	0.0115	0.0095	0.0308333	-0.0145	-0.0186667	-0.008	0.0205	0.0623333	0.0218333
																					-0.3	1			-0.31	-0.031	-0.0094919	-0.00590909	0.01625	0.03375	-0.0235	-0.0235	-0.00666667	-0.00142857	-0.0105	0.161833	-0.0283333	0.0301667	0.0285	0.0781667	0.0428333	-0.0025	-0.0145	-0.0186667	-0.008	-0.0128333	-0.00433333	-0.0115
																					-0.29	2			-0.3	-0.031	-0.0094919	-0.00590909	0.01625	-0.0495833	-0.0235	-0.0235	-0.00666667	-0.00142857	-0.0105	-0.00483333	0.005	-0.00316667	-0.00483333	0.0115	0.0095	-0.0025	0.118833	-0.0186667	-0.008	-0.0128333	0.029	-0.0115
																					-0.28	0			-0.29	0.169	-0.0094919	-0.00590909	-0.04625	0.03375	-0.0235	-0.0235	-0.00666667	-0.00142857	-0.0105	-0.00483333	0.0383333	-0.00316667	-0.00483333	-0.0218333	-0.0238333	0.0308333	-0.0145	-0.0186667	0.0253333	-0.0128333	-0.0376667	-0.0115
																					-0.27	0			-0.28	-0.031	-0.0094919	-0.00590909	0.01625	-0.0495833	-0.0235	-0.0235	-0.00666667	-0.00142857	0.0145	-0.00483333	-0.0283333	0.0301667	-0.00483333	0.0448333	0.0095	0.0308333	-0.0145	0.0146667	-0.008	0.0205	-0.00433333	-0.0115
																					-0.26	0			-0.27	-0.031	-0.0094919	-0.00590909	-0.04625	0.03375	-0.0235	-0.0235	-0.00666667	-0.00142857	-0.0105	0.0285	0.005	-0.00316667	-0.00483333	-0.0218333	-0.0571667	0.0308333	-0.0145	-0.0186667	-0.008	0.0205	-0.00433333	0.0218333
																					-0.25	0			-0.26	0.169	-0.0094919	-0.00590909	-0.04625	-0.0495833	0.0765	0.0765	-0.00666667	-0.00142857	0.0145	-0.00483333	-0.0283333	-0.00316667	-0.00483333	-0.0218333	-0.0238333	-0.0025	0.0188333	-0.0186667	-0.008	-0.0128333	0.029	0.0218333
																					-0.24	0			-0.25	-0.031	-0.0094919	-0.00590909	0.01625	0.03375	-0.0235	-0.0235	-0.00666667	-0.00142857	-0.0105	0.0285	0.105	-0.00316667	-0.00483333	0.0448333	-0.0571667	-0.0025	0.0855	0.048	-0.008	-0.0128333	-0.00433333	0.0218333
																					-0.23	0			-0.24	-0.031	-0.0094919	-0.00590909	-0.04625	-0.0495833	0.0765	0.0765	-0.00666667	-0.00142857	-0.0105	-0.00483333	-0.0616667	-0.00316667	-0.00483333	0.0115	-0.0571667	-0.0025	0.0521667	-0.0186667	-0.008	-0.0128333	-0.00433333	-0.0115
																					-0.22	1			-0.23	-0.031	-0.0094919	-0.00590909	-0.04625	-0.0495833	-0.0235	-0.0235	-0.00666667	-0.00142857	-0.0105	-0.00483333	-0.0283333	-0.00316667	0.0285	-0.0218333	-0.0238333	-0.0025	0.0188333	-0.0186667	-0.008	0.0205	0.029	-0.0115
																					-0.21	0			-0.22	-0.031	-0.0094919	-0.00590909	0.01625	0.03375	-0.0235	-0.0235	-0.00666667	-0.00142857	-0.0105	0.0285	0.0716667	-0.00316667	-0.00483333	0.0115	-0.0571667	-0.0025	-0.0145	-0.0186667	-0.008	0.0205	-0.0376667	-0.0115
																					-0.2	0			-0.21	-0.031	-0.0094919	-0.00590909	-0.04625	-0.0495833	0.0765	0.0765	-0.00666667	-0.00142857	0.0145	0.0285	-0.0616667	0.0301667	-0.00483333	0.0115	-0.0905	-0.0025	-0.0145	0.0146667	-0.008	-0.0128333	-0.00433333	0.0551667
																					-0.19	0			-0.2	-0.031	-0.0094919	-0.00590909	0.01625	0.03375	0.0765	0.0765	-0.00666667	-0.00142857	-0.0105	-0.00483333	0.0383333	-0.00316667	-0.00483333	0.0448333	0.0428333	-0.0025	-0.0145	-0.0186667	-0.008	0.0205	-0.00433333	-0.0115
																					-0.18	1			-0.19	-0.031	0.101619	0.085	0.01625	0.03375	-0.0235	-0.0235	-0.00666667	-0.00142857	0.0145	-0.00483333	0.138333	-0.00316667	-0.00483333	0.0115	-0.0571667	-0.0025	0.0521667	0.0146667	0.0253333	-0.0128333	-0.00433333	-0.0115
																					-0.17	0			-0.18	-0.031	-0.0094919	-0.00590909	0.01625	-0.0495833	-0.0235	-0.0235	-0.00666667	-0.00142857	0.0145	-0.00483333	0.0383333	-0.00316667	-0.00483333	-0.0218333	0.0761667	-0.0025	-0.0145	0.0146667	-0.008	-0.0128333	-0.0376667	-0.0115
																					-0.16	0			-0.17	-0.031	0.101619	-0.00590909	0.01625	-0.0495833	0.0765	0.0765	-0.00666667	-0.00142857	0.0145	-0.00483333	-0.0283333	-0.00316667	-0.00483333	-0.0218333	-0.0905	-0.0025	-0.0145	-0.0186667	-0.008	-0.0128333	-0.00433333	-0.0115
																					-0.15	0			-0.16	-0.031	-0.0094919	-0.00590909	-0.04625	0.03375	-0.0235	-0.0235	-0.00666667	-0.00142857	0.0145	-0.00483333	-0.0283333	-0.00316667	-0.00483333	0.0448333	-0.0238333	-0.0025	-0.0145	-0.0186667	-0.008	-0.0128333	-0.0376667	0.0218333
																					-0.14	0			-0.15	0.169	-0.0094919	-0.00590909	0.01625	0.03375	-0.0235	-0.0235	-0.00666667	-0.00142857	-0.0105	0.0285	-0.0616667	-0.00316667	-0.00483333	-0.0218333	0.0428333	-0.0025	-0.0145	0.0146667	0.0253333	-0.0128333	-0.0376667	0.0218333
																					-0.13	0			-0.14	-0.031	-0.0094919	0.085	0.01625	-0.0495833	-0.0235	-0.0235	-0.00666667	-0.00142857	-0.0105	-0.00483333	0.0716667	-0.00316667	0.0285	-0.0218333	0.0428333	0.0308333	-0.0145	-0.0186667	-0.008	-0.0128333	-0.0376667	0.0218333
																					-0.12	1			-0.13	-0.031	-0.0094919	-0.00590909	0.01625	-0.0495833	-0.0235	-0.0235	-0.00666667	-0.00142857	0.0145	-0.00483333	0.005	-0.00316667	-0.00483333	-0.0218333	0.0428333	-0.0025	-0.0145	-0.0186667	-0.008	0.0205	-0.00433333	-0.0115
																					-0.11	0			-0.12	-0.031	-0.0094919	-0.00590909	-0.04625	0.117083	-0.0235	-0.0235	-0.00666667	-0.00142857	-0.0105	-0.00483333	-0.0283333	-0.00316667	-0.00483333	0.0115	0.0095	-0.0025	0.0521667	0.048	0.0253333	0.0205	-0.00433333	-0.0115
																					-0.1	0			-0.11	0.169	-0.0094919	-0.00590909	-0.04625	0.03375	0.0765	0.0765	-0.00666667	-0.00142857	-0.0105	-0.00483333	0.0383333	-0.00316667	-0.00483333	-0.0218333	0.0095	-0.0025	0.0521667	0.048	0.0253333	0.0205	0.029	-0.0115
																					-0.09	0			-0.1	-0.031	-0.0094919	-0.00590909	-0.04625	-0.0495833	0.0765	0.0765	0.104444	-0.00142857	-0.0105	-0.00483333	0.0716667	0.0635	-0.00483333	0.0115	0.0428333	0.0308333	0.0188333	0.0146667	-0.008	-0.0128333	0.029	-0.0115
																					-0.08	1			-0.09	-0.031	-0.0094919	-0.00590909	0.01625	-0.0495833	0.0765	0.0765	-0.00666667	-0.00142857	-0.0105	-0.00483333	-0.0616667	-0.00316667	-0.00483333	-0.0218333	-0.0238333	-0.0025	-0.0145	0.114667	0.0253333	0.0205	0.029	-0.0115
																					-0.07	0			-0.08	-0.031	-0.0094919	0.085	-0.04625	0.03375	-0.0235	-0.0235	-0.00666667	-0.00142857	-0.0105	-0.00483333	-0.0283333	-0.00316667	-0.00483333	-0.0218333	0.0428333	-0.0025	-0.0145	-0.0186667	-0.008	0.0205	-0.0376667	0.0218333
																					-0.06	1			-0.07	-0.031	-0.0094919	-0.00590909	-0.04625	-0.0495833	-0.0235	-0.0235	-0.00666667	-0.00142857	-0.0105	-0.00483333	0.0383333	-0.00316667	-0.00483333	-0.0218333	-0.0238333	-0.0025	-0.0145	-0.0186667	-0.008	-0.0128333	0.029	0.0218333
																					-0.05	0			-0.06	-0.031	-0.0094919	-0.00590909	0.01625	-0.0495833	-0.0235	-0.0235	-0.00666667	-0.00142857	-0.0105	-0.00483333	0.0383333	-0.00316667	0.0285	-0.0218333	0.0095	0.0308333	-0.0145	-0.0186667	-0.008	-0.0128333	0.0623333	-0.0115
																					-0.04	3			-0.05	-0.031	-0.0094919	-0.00590909	-0.04625	-0.0495833	-0.0235	-0.0235	-0.00666667	-0.00142857	-0.0105	-0.00483333	0.0383333	-0.00316667	-0.00483333	0.0781667	-0.0238333	0.0308333	-0.0145	-0.0186667	0.0253333	0.0205	-0.00433333	0.0551667
																					-0.03	1			-0.04	-0.031	-0.0094919	-0.00590909	-0.04625	0.117083	-0.0235	-0.0235	-0.00666667	-0.00142857	0.0395	-0.00483333	0.0383333	-0.00316667	-0.00483333	-0.0218333	0.0428333	0.0308333	-0.0145	0.048	-0.008	-0.0128333	-0.00433333	-0.0115
																					-0.02	1			-0.03	0.369	-0.0094919	-0.00590909	0.07875	0.03375	-0.0235	-0.0235	-0.00666667	-0.00142857	0.0145	0.0285	0.005	-0.00316667	-0.00483333	0.0781667	-0.0571667	-0.0025	-0.0145	0.0146667	-0.008	0.0205	-0.00433333	0.0218333
																					-0.01	0			-0.02	-0.031	-0.0094919	-0.00590909	0.01625	0.03375	0.0765	0.0765	-0.00666667	-0.00142857	-0.0105	-0.00483333	0.005	-0.00316667	-0.00483333	-0.0218333	0.0095	-0.0025	-0.0145	0.0146667	-0.008	-0.0128333	-0.00433333	0.0218333
																					0	0			-0.01	0.169	-0.0094919	-0.00590909	0.01625	0.117083	-0.0235	-0.0235	-0.00666667	-0.00142857	-0.0105	-0.00483333	0.105	-0.00316667	-0.00483333	0.0115	0.0428333	0.0308333	-0.0145	-0.0186667	-0.008	-0.0128333	0.029	-0.0115
																					0.01	2			0	-0.031	-0.0094919	-0.00590909	0.01625	0.117083	-0.0235	-0.0235	-0.00666667	-0.00142857	0.0145	-0.00483333	0.0383333	-0.00316667	-0.00483333	-0.0218333	-0.0238333	-0.0025	-0.0145	-0.0186667	0.0253333	-0.0128333	-0.00433333	0.0551667
																					0.02	0			0.01	-0.031	0.101619	-0.00590909	-0.04625	-0.0495833	-0.0235	-0.0235	-0.00666667	-0.00142857	-0.0105	-0.00483333	0.171667	-0.00316667	-0.00483333	0.0115	0.0761667	-0.0025	-0.0145	0.0813333	0.0253333	-0.0128333	0.029	0.0218333
																					0.03	1			0.02	0.369	-0.0094919	-0.00590909	0.01625	0.03375	-0.0235	-0.0235	-0.00666667	-0.00142857	0.0145	-0.00483333	0.0716667	-0.00316667	-0.00483333	0.0115	0.242833	-0.0025	-0.0145	0.0813333	-0.008	-0.0128333	-0.00433333	0.0218333
																					0.04	8			0.03	0.169	0.323841	-0.00590909	-0.04625	-0.0495833	0.0765	0.0765	0.215556	-0.00142857	0.0145	-0.00483333	0.005	0.0968333	-0.00483333	0.0115	0.176167	-0.0025	-0.0145	0.181333	0.0253333	0.0205	0.029	0.0551667
																					0.05	9			0.04	0.169	0.434953	-0.00590909	0.07875	-0.0495833	0.1765	0.1765	0.215556	-0.00142857	-0.0105	-0.00483333	0.138333	-0.00316667	-0.00483333	0.0115	0.1095	-0.0025	-0.0145	0.114667	0.0586667	0.0205	-0.00433333	0.0551667
																					0.06	10			0.05	0.169	-0.0094919	-0.00590909	0.01625	0.200417	0.2765	0.2765	0.104444	-0.00142857	0.0645	-0.00483333	0.238333	0.0635	0.0285	-0.0218333	0.3095	-0.0025	-0.0145	0.0813333	0.0586667	-0.0128333	-0.00433333	0.0551667
																					0.07	8			0.06	0.169	-0.0094919	-0.00590909	0.07875	0.200417	0.4765	0.4765	0.104444	-0.00142857	0.1395	-0.00483333	0.005	-0.00316667	-0.00483333	0.1115	0.0095	-0.0025	0.0188333	0.214667	0.092	-0.0128333	0.029	0.0551667
																					0.08	5			0.07	-0.031	-0.0094919	0.085	0.20375	0.03375	0.2765	0.2765	0.215556	0.141429	0.1645	-0.00483333	0.0716667	-0.00316667	-0.00483333	-0.0218333	-0.0238333	0.0641667	0.0188333	0.048	-0.008	0.0205	0.0623333	0.0218333
																					0.09	3			0.08	-0.031	-0.0094919	0.175909	0.01625	0.450417	0.3765	0.3765	-0.00666667	0.141429	0.0395	-0.00483333	0.005	-0.00316667	-0.00483333	0.0781667	-0.0905	-0.0025	-0.0145	0.0146667	0.0586667	0.0205	-0.00433333	-0.0115
																					0.1	2			0.09	-0.031	-0.0094919	-0.00590909	-0.04625	0.367083	-0.0235	-0.0235	-0.00666667	0.141429	-0.0105	0.0618333	0.0716667	-0.00316667	-0.00483333	0.0781667	-0.0905	0.0641667	-0.0145	0.114667	-0.008	-0.0128333	0.0956667	0.0885
																					0.11	2			0.1	-0.031	-0.0094919	0.175909	0.01625	0.367083	0.3765	0.3765	0.104444	-0.00142857	0.0145	0.0618333	0.138333	-0.00316667	-0.00483333	-0.0218333	-0.0905	0.0641667	0.0855	0.114667	0.0253333	0.0205	-0.0376667	0.0218333
																					0.12	2			0.11	-0.031	-0.0094919	0.085	-0.04625	0.28375	0.0765	0.0765	-0.00666667	-0.00142857	-0.0105	0.0285	0.105	-0.00316667	-0.00483333	0.0448333	-0.0905	-0.0025	0.152167	0.114667	0.0253333	0.0205	0.029	0.0218333
																					0.13	2			0.12	-0.031	0.101619	0.085	0.20375	0.28375	0.0765	0.0765	-0.00666667	0.141429	0.0145	0.0618333	0.0716667	-0.00316667	-0.00483333	0.0115	-0.0905	0.0641667	0.0521667	0.114667	-0.008	-0.0128333	-0.00433333	-0.0115
																					0.14	2			0.13	-0.031	-0.0094919	0.085	0.20375	0.200417	-0.0235	-0.0235	0.104444	0.284286	-0.0105	-0.00483333	0.138333	-0.00316667	-0.00483333	0.0448333	-0.0571667	-0.0025	0.0521667	0.114667	0.0253333	0.0205	0.0623333	0.121833
																					0.15	4			0.14	-0.031	-0.0094919	0.175909	0.07875	0.367083	0.2765	0.2765	-0.00666667	0.284286	0.0145	0.0618333	0.0383333	-0.00316667	-0.00483333	0.0115	-0.0905	0.0641667	0.318833	0.0813333	0.0586667	-0.0128333	0.0956667	0.0218333
																					0.16	2			0.15	-0.031	0.21273	0.266818	0.01625	0.200417	0.1765	0.1765	-0.00666667	0.141429	-0.0105	0.0951667	0.0716667	0.0635	-0.00483333	0.178167	-0.0905	0.0641667	0.0855	0.148	-0.008	0.0538333	0.029	-0.0115
																					0.17	1			0.16	0.169	-0.0094919	0.175909	0.01625	0.117083	-0.0235	-0.0235	-0.00666667	0.141429	0.0395	0.1285	0.105	-0.00316667	-0.00483333	0.0115	-0.0238333	0.0975	0.0521667	0.0813333	0.125333	0.0205	-0.00433333	0.121833
																					0.18	3			0.17	-0.031	-0.0094919	0.175909	-0.04625	0.28375	0.1765	0.1765	-0.00666667	0.141429	0.0145	-0.00483333	0.138333	0.0301667	-0.00483333	0.0448333	-0.0571667	0.0641667	0.0188333	0.114667	-0.008	0.0205	0.162333	0.0885
																					0.19	6			0.18	-0.031	0.101619	-0.00590909	0.01625	0.117083	0.0765	0.0765	-0.00666667	-0.00142857	0.0395	0.161833	-0.0283333	-0.00316667	-0.00483333	0.2115	0.0428333	0.0308333	0.0855	0.148	0.092	0.0205	0.0956667	0.155167
																					0.2	2			0.19	-0.031	-0.0094919	0.085	0.07875	0.28375	-0.0235	-0.0235	-0.00666667	-0.00142857	-0.0105	0.1285	0.105	-0.00316667	-0.00483333	0.0115	0.0095	-0.0025	-0.0145	0.148	-0.008	-0.0128333	0.0623333	0.0885
																					0.21	3			0.2	0.169	0.101619	0.085	0.14125	0.03375	-0.0235	-0.0235	-0.00666667	-0.00142857	-0.0105	0.1285	0.105	0.0635	-0.00483333	0.0115	0.142833	0.0975	0.152167	0.214667	-0.008	0.0871667	0.029	0.0551667
																					0.22	6			0.21	-0.031	-0.0094919	0.357727	0.01625	0.03375	0.0765	0.0765	-0.00666667	-0.00142857	0.0145	0.0285	0.0383333	-0.00316667	-0.00483333	-0.0218333	0.176167	0.0308333	0.1855	0.448	0.0253333	0.1205	-0.00433333	0.155167
																					0.23	3			0.22	-0.031	-0.0094919	0.085	0.01625	-0.0495833	-0.0235	-0.0235	-0.00666667	-0.00142857	0.0395	0.0285	0.0383333	-0.00316667	-0.00483333	0.1115	0.142833	-0.0025	0.1855	0.114667	0.0253333	0.0538333	0.029	0.0885
																					0.24	1			0.23	-0.031	-0.0094919	-0.00590909	0.07875	0.117083	-0.0235	-0.0235	-0.00666667	0.141429	-0.0105	0.0285	0.138333	-0.00316667	-0.00483333	0.0448333	0.142833	0.0975	0.0855	0.181333	0.0253333	0.0538333	0.0623333	0.121833
																					0.25	1			0.24	-0.031	-0.0094919	0.266818	0.07875	-0.0495833	-0.0235	-0.0235	-0.00666667	0.141429	-0.0105	0.0285	0.105	0.0301667	0.0285	0.0115	0.1095	0.0308333	0.118833	0.248	-0.008	0.0205	-0.00433333	0.0551667
																					0.26	2			0.25	-0.031	-0.0094919	0.085	-0.04625	0.200417	0.1765	0.1765	-0.00666667	-0.00142857	0.0395	0.0285	0.0383333	0.0301667	0.0285	0.0448333	0.242833	-0.0025	0.0521667	0.248	0.0253333	-0.0128333	0.0623333	0.121833
																					0.27	1			0.26	-0.031	-0.0094919	0.266818	0.01625	0.117083	-0.0235	-0.0235	0.104444	0.141429	-0.0105	-0.00483333	0.0716667	0.0301667	0.0618333	0.0115	0.176167	-0.0025	0.0521667	0.214667	0.0253333	-0.0128333	-0.00433333	0.155167
																					0.28	0			0.27	-0.031	-0.0094919	0.266818	0.07875	-0.0495833	-0.0235	-0.0235	0.104444	0.141429	-0.0105	-0.00483333	0.0716667	-0.00316667	0.0285	0.0115	0.0761667	0.0308333	0.1855	0.0813333	0.0253333	0.0871667	0.229	-0.0115
																					0.29	0			0.28	0.169	-0.0094919	-0.00590909	0.14125	0.03375	-0.0235	-0.0235	-0.00666667	-0.00142857	-0.0105	-0.00483333	0.105	-0.00316667	0.0618333	0.0448333	0.2095	-0.0025	0.1855	0.248	-0.008	-0.0128333	-0.00433333	0.121833
																					0.3	4			0.29	0.169	-0.0094919	-0.00590909	0.20375	-0.0495833	-0.0235	-0.0235	0.104444	0.141429	-0.0105	0.0618333	0.0716667	0.0301667	0.0618333	0.0115	0.0428333	0.0641667	0.0521667	0.348	0.0586667	0.0871667	-0.00433333	0.1885
																					0.31	4			0.3	0.169	-0.0094919	-0.00590909	0.07875	0.03375	-0.0235	-0.0235	-0.00666667	-0.00142857	0.0145	0.0285	0.0383333	-0.00316667	0.0285	0.0448333	0.0761667	0.0308333	0.118833	0.281333	0.0253333	0.0205	-0.0376667	0.0218333
																					0.32	2			0.31	-0.031	-0.0094919	0.175909	0.07875	0.03375	-0.0235	-0.0235	0.104444	0.284286	-0.0105	0.0285	0.105	0.0635	-0.00483333	0.0115	0.0428333	0.0641667	0.0855	0.181333	-0.008	0.0205	0.029	0.0885
																					0.33	1			0.32	-0.031	-0.0094919	-0.00590909	0.14125	0.117083	0.0765	0.0765	0.104444	-0.00142857	0.0145	-0.00483333	-0.0283333	0.0301667	-0.00483333	0.0448333	-0.0238333	0.0641667	0.118833	0.148	0.0253333	0.0205	0.162333	0.0885
																					0.34	0			0.33	-0.031	-0.0094919	-0.00590909	0.01625	0.03375	-0.0235	-0.0235	-0.00666667	-0.00142857	-0.0105	-0.00483333	0.105	-0.00316667	-0.00483333	0.0448333	0.0095	-0.0025	0.0855	0.214667	-0.008	0.0538333	0.162333	0.0885
																					0.35	1			0.34	-0.031	-0.0094919	0.085	0.14125	0.117083	-0.0235	-0.0235	-0.00666667	-0.00142857	-0.0105	0.0285	0.0716667	0.0635	-0.00483333	0.0448333	-0.0238333	0.0308333	0.0521667	0.0813333	0.0586667	-0.0128333	-0.00433333	0.155167
																					0.36	1			0.35	-0.031	-0.0094919	-0.00590909	-0.04625	0.03375	0.1765	0.1765	-0.00666667	-0.00142857	-0.0105	0.0618333	-0.0283333	0.0301667	-0.00483333	0.0115	0.0761667	0.0308333	0.0188333	0.114667	-0.008	0.1205	0.029	0.0551667
																					0.37	1			0.36	-0.031	-0.0094919	0.085	0.07875	0.200417	-0.0235	-0.0235	0.104444	-0.00142857	-0.0105	-0.00483333	0.171667	-0.00316667	0.0285	0.1115	0.0761667	-0.0025	-0.0145	0.0813333	-0.008	0.0205	0.029	0.121833
																					0.38	0			0.37	-0.031	-0.0094919	0.085	-0.04625	0.03375	-0.0235	-0.0235	0.104444	-0.00142857	-0.0105	-0.00483333	0.0716667	-0.00316667	-0.00483333	0.0781667	0.142833	0.0308333	-0.0145	0.0813333	0.0253333	0.0205	0.162333	0.0218333
																					0.39	0			0.38	-0.031	-0.0094919	-0.00590909	-0.04625	-0.0495833	-0.0235	-0.0235	-0.00666667	-0.00142857	0.0145	-0.00483333	0.005	-0.00316667	-0.00483333	-0.0218333	0.1095	-0.0025	-0.0145	0.0146667	-0.008	0.0205	0.029	0.0218333
																					0.4	1			0.39	-0.031	-0.0094919	0.175909	-0.04625	0.117083	-0.0235	-0.0235	-0.00666667	-0.00142857	-0.0105	-0.00483333	0.0383333	-0.00316667	0.0285	0.0781667	-0.0238333	-0.0025	-0.0145	0.0146667	0.0253333	0.0205	0.129	0.0551667
																					0.41	1			0.4	-0.031	-0.0094919	0.085	0.07875	-0.0495833	-0.0235	-0.0235	-0.00666667	-0.00142857	-0.0105	-0.00483333	0.0383333	-0.00316667	-0.00483333	-0.0218333	0.0761667	-0.0025	0.0521667	0.0146667	-0.008	0.0871667	0.129	0.0218333
																					0.42	0			0.41	-0.031	-0.0094919	-0.00590909	0.07875	0.03375	-0.0235	-0.0235	0.104444	-0.00142857	0.0145	-0.00483333	-0.0283333	-0.00316667	0.0285	-0.0218333	0.0428333	0.0308333	-0.0145	-0.0186667	0.0253333	0.0538333	0.0956667	0.0885
																					0.43	1			0.42	-0.031	-0.0094919	0.085	0.20375	0.03375	-0.0235	-0.0235	-0.00666667	-0.00142857	-0.0105	-0.00483333	-0.0616667	0.0301667	-0.00483333	0.0115	0.0095	-0.0025	-0.0145	-0.0186667	0.0253333	-0.0128333	-0.0376667	0.0551667
																					0.44	0			0.43	-0.031	-0.0094919	-0.00590909	0.01625	0.117083	0.0765	0.0765	-0.00666667	-0.00142857	-0.0105	-0.00483333	0.0383333	0.0301667	-0.00483333	-0.0218333	0.142833	-0.0025	-0.0145	-0.0186667	0.0586667	0.0538333	-0.00433333	0.121833
																					0.45	1			0.44	-0.031	-0.0094919	0.085	0.01625	-0.0495833	-0.0235	-0.0235	-0.00666667	-0.00142857	-0.0105	-0.00483333	0.105	-0.00316667	0.0618333	-0.0218333	0.0428333	-0.0025	-0.0145	-0.0186667	0.0253333	0.0871667	0.0956667	0.0885
																					0.46	0			0.45	-0.031	-0.0094919	-0.00590909	0.01625	0.117083	0.0765	0.0765	-0.00666667	-0.00142857	-0.0105	-0.00483333	-0.0283333	-0.00316667	-0.00483333	0.0115	0.0428333	-0.0025	0.0188333	0.0146667	-0.008	0.0538333	0.0623333	0.121833
																					0.47	2			0.46	-0.031	-0.0094919	-0.00590909	0.01625	0.03375	-0.0235	-0.0235	-0.00666667	-0.00142857	0.0145	-0.00483333	-0.0283333	-0.00316667	-0.00483333	0.1115	0.0428333	0.0308333	0.0188333	0.048	-0.008	0.0205	0.195667	0.0218333
																					0.48	1			0.47	-0.031	-0.0094919	0.085	0.01625	0.117083	0.0765	0.0765	-0.00666667	-0.00142857	-0.0105	-0.00483333	0.005	-0.00316667	-0.00483333	0.0115	0.0428333	-0.0025	0.0188333	0.0146667	0.0586667	0.0205	-0.0376667	0.0551667
																					0.49	2			0.48	-0.031	0.101619	0.085	0.07875	-0.0495833	-0.0235	-0.0235	-0.00666667	-0.00142857	-0.0105	0.0285	0.138333	-0.00316667	-0.00483333	-0.0218333	0.176167	0.0308333	0.0188333	-0.0186667	-0.008	0.0205	0.0623333	0.0551667
																					0.5	0			0.49	-0.031	-0.0094919	-0.00590909	0.07875	-0.0495833	0.0765	0.0765	-0.00666667	-0.00142857	0.0145	-0.00483333	0.105	0.0301667	-0.00483333	0.0115	0.142833	-0.0025	-0.0145	-0.0186667	-0.008	-0.0128333	-0.00433333	0.0218333
																					0.51	1			0.5	-0.031	-0.0094919	0.085	-0.04625	-0.0495833	0.0765	0.0765	-0.00666667	-0.00142857	-0.0105	-0.00483333	-0.0616667	-0.00316667	-0.00483333	-0.0218333	0.2095	-0.0025	0.0188333	-0.0186667	-0.008	0.0205	0.0623333	0.0885
																					0.52	0			0.51	-0.031	-0.0094919	-0.00590909	0.07875	-0.0495833	0.0765	0.0765	0.104444	0.141429	-0.0105	-0.00483333	0.105	-0.00316667	-0.00483333	0.0781667	0.176167	-0.0025	-0.0145	-0.0186667	0.0253333	-0.0128333	-0.0376667	0.0218333
																					0.53	0			0.52	0.169	-0.0094919	0.175909	0.20375	0.03375	-0.0235	-0.0235	0.104444	-0.00142857	0.0145	-0.00483333	0.005	0.0301667	-0.00483333	0.0115	0.0095	-0.0025	0.0188333	-0.0186667	-0.008	0.0538333	0.129	-0.0115
																					0.54	0			0.53	-0.031	-0.0094919	0.085	-0.04625	-0.0495833	-0.0235	-0.0235	0.104444	-0.00142857	0.0145	-0.00483333	0.138333	-0.00316667	-0.00483333	0.0115	0.0761667	-0.0025	-0.0145	-0.0186667	0.0253333	0.0538333	0.0956667	0.121833
																					0.55	1			0.54	-0.031	-0.0094919	0.085	-0.04625	0.03375	0.0765	0.0765	-0.00666667	-0.00142857	0.0145	-0.00483333	0.138333	-0.00316667	-0.00483333	0.0115	0.0095	-0.0025	-0.0145	-0.0186667	0.0586667	0.0205	0.029	0.155167
																					0.56	1			0.55	-0.031	-0.0094919	0.175909	0.20375	0.117083	-0.0235	-0.0235	0.104444	-0.00142857	-0.0105	0.0285	0.0716667	-0.00316667	-0.00483333	-0.0218333	0.0761667	-0.0025	-0.0145	-0.0186667	0.0253333	-0.0128333	0.129	0.0885
																					0.57	0			0.56	-0.031	-0.0094919	-0.00590909	0.07875	-0.0495833	-0.0235	-0.0235	-0.00666667	-0.00142857	-0.0105	-0.00483333	0.0716667	-0.00316667	-0.00483333	0.0115	0.176167	0.0641667	-0.0145	-0.0186667	0.0253333	-0.0128333	0.0956667	0.121833
																					0.58	2			0.57	-0.031	-0.0094919	0.085	0.14125	0.200417	-0.0235	-0.0235	0.104444	-0.00142857	-0.0105	-0.00483333	0.0716667	-0.00316667	0.0285	-0.0218333	0.1095	-0.0025	-0.0145	-0.0186667	0.0253333	0.0538333	0.0623333	0.0218333
																					0.59	1			0.58	-0.031	-0.0094919	0.085	0.01625	-0.0495833	-0.0235	-0.0235	-0.00666667	-0.00142857	-0.0105	0.0285	0.138333	-0.00316667	-0.00483333	0.0448333	0.142833	-0.0025	-0.0145	-0.0186667	0.0253333	0.0205	-0.0376667	0.121833
																					0.6	0			0.59	-0.031	-0.0094919	-0.00590909	0.07875	0.03375	0.1765	0.1765	-0.00666667	-0.00142857	0.0145	-0.00483333	0.0383333	-0.00316667	-0.00483333	0.0781667	-0.0238333	-0.0025	0.0521667	-0.0186667	0.0253333	0.0205	0.0623333	0.0218333
																					0.61	0			0.6	-0.031	-0.0094919	-0.00590909	0.07875	0.117083	0.0765	0.0765	-0.00666667	-0.00142857	-0.0105	0.0285	0.0383333	0.0301667	-0.00483333	0.0115	0.1095	-0.0025	-0.0145	0.0146667	-0.008	0.0538333	0.029	0.0551667
																					0.62	0			0.61	-0.031	-0.0094919	0.085	0.07875	0.200417	-0.0235	-0.0235	-0.00666667	-0.00142857	-0.0105	-0.00483333	0.138333	-0.00316667	-0.00483333	0.0781667	0.176167	-0.0025	0.0188333	0.0146667	-0.008	0.0205	0.0956667	-0.0115
																					0.63	1			0.62	-0.031	0.101619	0.085	0.20375	0.03375	-0.0235	-0.0235	-0.00666667	-0.00142857	-0.0105	-0.00483333	-0.0283333	-0.00316667	-0.00483333	-0.0218333	0.0761667	0.0308333	-0.0145	-0.0186667	0.092	-0.0128333	0.0623333	0.0551667
																					0.64	0			0.63	-0.031	-0.0094919	0.085	0.14125	0.03375	-0.0235	-0.0235	-0.00666667	0.141429	-0.0105	-0.00483333	0.171667	-0.00316667	-0.00483333	-0.0218333	0.0761667	-0.0025	-0.0145	-0.0186667	0.0253333	0.0538333	-0.00433333	0.0885
																					0.65	1			0.64	-0.031	-0.0094919	0.085	0.01625	-0.0495833	0.0765	0.0765	-0.00666667	-0.00142857	0.0145	0.0285	0.0383333	0.0301667	0.0285	-0.0218333	0.0428333	-0.0025	0.0188333	-0.0186667	-0.008	-0.0128333	0.0623333	0.0218333
																					0.66	0			0.65	-0.031	0.101619	-0.00590909	0.07875	0.03375	0.0765	0.0765	-0.00666667	-0.00142857	-0.0105	0.0285	0.138333	0.0301667	-0.00483333	0.0781667	-0.0238333	-0.0025	-0.0145	0.048	0.0586667	0.0538333	0.0623333	0.0218333
																					0.67	0			0.66	-0.031	-0.0094919	-0.00590909	0.20375	-0.0495833	-0.0235	-0.0235	-0.00666667	-0.00142857	-0.0105	-0.00483333	-0.0283333	-0.00316667	0.0285	0.0115	-0.0571667	-0.0025	-0.0145	0.048	0.0253333	0.0205	0.0623333	-0.0115
																					0.68	0			0.67	-0.031	-0.0094919	0.357727	0.14125	-0.0495833	-0.0235	-0.0235	-0.00666667	-0.00142857	-0.0105	0.0618333	0.0383333	-0.00316667	-0.00483333	0.0448333	-0.0238333	-0.0025	-0.0145	-0.0186667	0.0253333	-0.0128333	-0.00433333	0.0885
																					0.69	0			0.68	-0.031	-0.0094919	-0.00590909	0.01625	-0.0495833	-0.0235	-0.0235	-0.00666667	0.141429	-0.0105	-0.00483333	0.0716667	-0.00316667	-0.00483333	0.0115	0.0428333	-0.0025	-0.0145	-0.0186667	-0.008	0.0205	-0.00433333	0.0885
																					0.7	0			0.69	-0.031	-0.0094919	-0.00590909	0.07875	-0.0495833	0.1765	0.1765	-0.00666667	-0.00142857	-0.0105	-0.00483333	0.0716667	0.0301667	-0.00483333	-0.0218333	-0.0571667	-0.0025	0.0188333	-0.0186667	-0.008	0.0205	0.029	0.0218333
																					0.71	3			0.7	-0.031	-0.0094919	-0.00590909	0.14125	-0.0495833	0.0765	0.0765	-0.00666667	-0.00142857	0.0395	-0.00483333	0.005	-0.00316667	-0.00483333	0.0115	0.0095	0.0308333	-0.0145	-0.0186667	0.0253333	-0.0128333	0.0623333	0.0218333
																					0.72	1			0.71	-0.031	-0.0094919	-0.00590909	0.01625	-0.0495833	-0.0235	-0.0235	-0.00666667	-0.00142857	-0.0105	-0.00483333	-0.0283333	-0.00316667	-0.00483333	0.0448333	-0.0571667	-0.0025	0.0855	-0.0186667	0.0253333	0.0205	0.129	0.0551667
																					0.73	2			0.72	-0.031	-0.0094919	0.085	0.07875	-0.0495833	-0.0235	-0.0235	-0.00666667	-0.00142857	-0.0105	-0.00483333	0.105	0.0635	-0.00483333	0.0115	0.176167	0.0308333	0.0521667	-0.0186667	0.0253333	-0.0128333	0.0623333	0.121833
																					0.74	1			0.73	-0.031	-0.0094919	-0.00590909	0.07875	-0.0495833	0.0765	0.0765	-0.00666667	-0.00142857	0.0395	-0.00483333	0.0383333	-0.00316667	-0.00483333	-0.0218333	-0.0571667	-0.0025	0.0188333	-0.0186667	0.092	-0.0128333	-0.00433333	-0.0115
																					0.75	0			0.74	-0.031	-0.0094919	-0.00590909	0.01625	-0.0495833	0.0765	0.0765	-0.00666667	-0.00142857	0.0145	-0.00483333	0.0716667	-0.00316667	-0.00483333	0.0115	-0.0238333	-0.0025	0.118833	-0.0186667	0.0253333	0.0205	-0.00433333	0.0218333
																					0.76	1			0.75	-0.031	-0.0094919	-0.00590909	-0.04625	-0.0495833	-0.0235	-0.0235	-0.00666667	-0.00142857	-0.0105	0.0285	0.105	-0.00316667	-0.00483333	-0.0218333	0.0761667	-0.0025	0.0188333	-0.0186667	0.0253333	-0.0128333	0.029	-0.0115
																					0.77	1			0.76	0.169	0.101619	-0.00590909	-0.04625	-0.0495833	-0.0235	-0.0235	-0.00666667	-0.00142857	-0.0105	-0.00483333	0.0716667	0.0301667	-0.00483333	0.0115	0.0095	0.0308333	-0.0145	-0.0186667	-0.008	-0.0128333	0.0623333	0.0218333
																					0.78	0			0.77	-0.031	0.101619	-0.00590909	0.01625	-0.0495833	-0.0235	-0.0235	-0.00666667	0.141429	-0.0105	-0.00483333	0.005	-0.00316667	-0.00483333	0.0781667	0.1095	0.0308333	-0.0145	-0.0186667	0.0253333	0.0205	0.129	0.0218333
																					0.79	1			0.78	-0.031	-0.0094919	0.085	0.01625	-0.0495833	-0.0235	-0.0235	-0.00666667	-0.00142857	0.0145	-0.00483333	0.105	-0.00316667	-0.00483333	-0.0218333	-0.0238333	0.0308333	0.0521667	0.0146667	0.0253333	0.0538333	0.029	0.0218333
																					0.8	1			0.79	-0.031	-0.0094919	-0.00590909	0.07875	-0.0495833	-0.0235	-0.0235	-0.00666667	-0.00142857	0.0145	-0.00483333	0.005	-0.00316667	-0.00483333	0.0448333	0.0095	-0.0025	-0.0145	0.0146667	0.0253333	0.0205	-0.00433333	0.0885
																					0.81	0			0.8	-0.031	-0.0094919	-0.00590909	0.01625	-0.0495833	-0.0235	-0.0235	-0.00666667	-0.00142857	-0.0105	-0.00483333	0.171667	-0.00316667	0.0285	0.0115	-0.0238333	-0.0025	-0.0145	-0.0186667	0.0253333	-0.0128333	0.029	0.0551667
																					0.82	0			0.81	-0.031	-0.0094919	-0.00590909	0.20375	-0.0495833	-0.0235	-0.0235	-0.00666667	-0.00142857	0.0395	-0.00483333	0.105	-0.00316667	-0.00483333	0.0781667	0.0095	-0.0025	-0.0145	-0.0186667	0.0253333	-0.0128333	-0.00433333	-0.0115
																					0.83	1			0.82	0.169	0.101619	-0.00590909	0.07875	-0.0495833	-0.0235	-0.0235	-0.00666667	-0.00142857	0.0145	-0.00483333	0.0716667	0.0301667	0.0285	-0.0218333	0.142833	-0.0025	0.0521667	-0.0186667	-0.008	-0.0128333	-0.00433333	-0.0115
																					0.84	1			0.83	-0.031	-0.0094919	0.085	0.07875	-0.0495833	-0.0235	-0.0235	-0.00666667	-0.00142857	-0.0105	0.0285	0.005	0.0301667	-0.00483333	0.0448333	0.1095	-0.0025	-0.0145	-0.0186667	-0.008	0.0205	0.029	0.0218333
																					0.85	0			0.84	-0.031	-0.0094919	-0.00590909	-0.04625	-0.0495833	-0.0235	-0.0235	-0.00666667	-0.00142857	-0.0105	-0.00483333	0.0383333	-0.00316667	0.0285	0.0115	0.0095	-0.0025	-0.0145	-0.0186667	0.0253333	0.0205	0.029	0.0551667
																					0.86	0			0.85	-0.031	-0.0094919	-0.00590909	0.07875	-0.0495833	-0.0235	-0.0235	0.104444	-0.00142857	0.0395	-0.00483333	0.005	-0.00316667	-0.00483333	0.0115	0.0761667	-0.0025	-0.0145	-0.0186667	-0.008	0.0205	0.029	0.0551667
																					0.87	0			0.86	-0.031	-0.0094919	-0.00590909	0.07875	-0.0495833	-0.0235	-0.0235	-0.00666667	-0.00142857	-0.0105	-0.00483333	0.105	-0.00316667	-0.00483333	0.0115	0.0428333	-0.0025	-0.0145	-0.0186667	0.0253333	0.0205	0.129	0.0551667
																					0.88	0			0.87	-0.031	-0.0094919	-0.00590909	0.07875	-0.0495833	-0.0235	-0.0235	-0.00666667	-0.00142857	-0.0105	-0.00483333	0.0716667	0.0301667	-0.00483333	0.0115	0.0095	0.0308333	-0.0145	-0.0186667	-0.008	-0.0128333	0.0956667	0.121833
																					0.89	2			0.88	-0.031	-0.0094919	-0.00590909	-0.04625	-0.0495833	-0.0235	-0.0235	-0.00666667	-0.00142857	-0.0105	-0.00483333	0.0383333	0.0301667	0.0285	0.0448333	0.0095	-0.0025	-0.0145	0.0146667	-0.008	0.0205	0.0956667	0.0885
																					0.9	1			0.89	-0.031	-0.0094919	-0.00590909	0.01625	-0.0495833	-0.0235	-0.0235	-0.00666667	-0.00142857	-0.0105	0.0285	0.0383333	-0.00316667	-0.00483333	-0.0218333	0.0095	-0.0025	-0.0145	-0.0186667	0.0586667	0.0205	0.029	0.0885
																					0.91	1			0.9	-0.031	-0.0094919	-0.00590909	0.07875	-0.0495833	-0.0235	-0.0235	-0.00666667	-0.00142857	-0.0105	-0.00483333	0.0383333	0.0301667	-0.00483333	-0.0218333	0.0428333	-0.0025	-0.0145	-0.0186667	-0.008	-0.0128333	0.129	0.0218333
																					0.92	1			0.91	-0.031	-0.0094919	-0.00590909	0.14125	-0.0495833	-0.0235	-0.0235	-0.00666667	-0.00142857	-0.0105	-0.00483333	0.005	-0.00316667	-0.00483333	0.0115	0.1095	-0.0025	0.0521667	0.0146667	-0.008	0.0538333	0.029	-0.0115
																					0.93	0			0.92	-0.031	-0.0094919	-0.00590909	-0.04625	-0.0495833	-0.0235	-0.0235	-0.00666667	-0.00142857	-0.0105	-0.00483333	0.005	-0.00316667	0.0285	-0.0218333	0.0428333	-0.0025	0.0188333	-0.0186667	-0.008	0.0205	0.0623333	0.0218333
																					0.94	1			0.93	0.169	-0.0094919	-0.00590909	0.01625	-0.0495833	-0.0235	-0.0235	-0.00666667	-0.00142857	0.0145	0.0285	0.0383333	-0.00316667	0.0618333	-0.0218333	-0.0238333	-0.0025	0.0188333	-0.0186667	-0.008	-0.0128333	-0.00433333	-0.0115
																					0.95	1			0.94	-0.031	-0.0094919	-0.00590909	0.07875	-0.0495833	-0.0235	-0.0235	-0.00666667	-0.00142857	-0.0105	-0.00483333	-0.0283333	-0.00316667	0.0285	-0.0218333	0.0428333	-0.0025	-0.0145	0.0146667	-0.008	0.0205	0.0623333	-0.0115
																					0.96	1			0.95	0.369	-0.0094919	0.085	0.01625	-0.0495833	0.0765	0.0765	-0.00666667	-0.00142857	-0.0105	-0.00483333	-0.0616667	-0.00316667	-0.00483333	0.0448333	-0.0238333	-0.0025	-0.0145	-0.0186667	0.0253333	-0.0128333	0.129	0.0551667
																					0.97	0			0.96	-0.031	-0.0094919	-0.00590909	-0.04625	-0.0495833	-0.0235	-0.0235	-0.00666667	-0.00142857	-0.0105	-0.00483333	-0.0283333	-0.00316667	-0.00483333	-0.0218333	0.1095	-0.0025	-0.0145	-0.0186667	-0.008	0.0205	0.029	0.0218333
																					0.98	0			0.97	-0.031	0.101619	0.175909	-0.04625	-0.0495833	-0.0235	-0.0235	-0.00666667	-0.00142857	-0.0105	-0.00483333	0.0383333	-0.00316667	-0.00483333	0.0115	-0.0238333	-0.0025	0.0188333	-0.0186667	-0.008	0.0205	-0.00433333	0.0218333
																					0.99	2			0.98	-0.031	-0.0094919	0.085	0.01625	-0.0495833	-0.0235	-0.0235	-0.00666667	-0.00142857	0.0145	-0.00483333	-0.0616667	0.0301667	-0.00483333	-0.0218333	0.0095	-0.0025	-0.0145	0.0146667	-0.008	-0.0128333	-0.00433333	0.0551667
																					1	0			0.99	-0.031	-0.0094919	0.085	0.01625	-0.0495833	-0.0235	-0.0235	-0.00666667	-0.00142857	0.0145	-0.00483333	0.005	0.0635	-0.00483333	-0.0218333	-0.0238333	-0.0025	-0.0145	-0.0186667	-0.008	-0.0128333	-0.00433333	0.0551667
																					1.01	1			1	-0.031	-0.0094919	0.085	-0.04625	-0.0495833	0.0765	0.0765	-0.00666667	-0.00142857	0.0145	-0.00483333	0.005	-0.00316667	-0.00483333	-0.0218333	-0.0905	-0.0025	-0.0145	-0.0186667	-0.008	-0.0128333	-0.00433333	0.0218333
																					1.02	2			1.01	0.169	-0.0094919	0.085	0.01625	-0.0495833	-0.0235	-0.0235	-0.00666667	-0.00142857	0.0145	-0.00483333	-0.0616667	-0.00316667	0.0618333	-0.0218333	0.0761667	-0.0025	0.0521667	-0.0186667	-0.008	0.0205	0.0956667	0.0551667
																					1.03	4			1.02	0.369	-0.0094919	-0.00590909	0.01625	-0.0495833	-0.0235	-0.0235	-0.00666667	-0.00142857	-0.0105	-0.00483333	-0.0616667	0.0301667	-0.00483333	-0.0218333	0.0095	0.0308333	-0.0145	0.0146667	0.0253333	0.0205	0.0623333	0.0218333
																					1.04	0			1.03	-0.031	-0.0094919	-0.00590909	-0.04625	-0.0495833	-0.0235	-0.0235	-0.00666667	-0.00142857	0.0145	-0.00483333	-0.0283333	-0.00316667	-0.00483333	-0.0218333	0.0095	-0.0025	0.0188333	-0.0186667	-0.008	0.0205	0.129	0.0218333
																					1.05	0			1.04	-0.031	-0.0094919	-0.00590909	0.01625	-0.0495833	-0.0235	-0.0235	-0.00666667	-0.00142857	-0.0105	-0.00483333	-0.0283333	-0.00316667	-0.00483333	0.0448333	-0.0238333	-0.0025	0.0188333	-0.0186667	0.0586667	0.0205	0.0623333	-0.0115
																					1.06	0			1.05	-0.031	-0.0094919	-0.00590909	0.01625	-0.0495833	-0.0235	-0.0235	-0.00666667	-0.00142857	-0.0105	-0.00483333	0.0383333	-0.00316667	-0.00483333	0.0115	0.0761667	-0.0025	-0.0145	-0.0186667	-0.008	-0.0128333	-0.0376667	-0.0115
																					1.07	1			1.06	-0.031	-0.0094919	0.085	0.14125	-0.0495833	-0.0235	-0.0235	0.104444	-0.00142857	0.0145	-0.00483333	-0.0283333	-0.00316667	-0.00483333	-0.0218333	0.0095	-0.0025	0.0188333	-0.0186667	0.0253333	0.0538333	0.029	0.0551667
																					1.08	0			1.07	-0.031	-0.0094919	-0.00590909	-0.04625	-0.0495833	-0.0235	-0.0235	-0.00666667	-0.00142857	-0.0105	-0.00483333	0.005	-0.00316667	0.0618333	-0.0218333	0.0095	-0.0025	-0.0145	-0.0186667	-0.008	0.0205	0.029	-0.0115
																					1.09	1			1.08	-0.031	-0.0094919	-0.00590909	0.01625	-0.0495833	-0.0235	-0.0235	-0.00666667	-0.00142857	-0.0105	0.0285	0.0383333	-0.00316667	-0.00483333	-0.0218333	0.0428333	0.0308333	-0.0145	-0.0186667	0.0253333	0.0538333	0.0623333	-0.0115
																					1.1	1			1.09	0.169	-0.0094919	0.085	-0.04625	-0.0495833	-0.0235	-0.0235	-0.00666667	-0.00142857	0.0145	-0.00483333	0.005	-0.00316667	0.0285	0.0115	0.176167	0.0308333	0.0521667	-0.0186667	0.0253333	0.0205	0.029	0.0885
																					1.11	1			1.1	0.369	-0.0094919	-0.00590909	-0.04625	-0.0495833	-0.0235	-0.0235	-0.00666667	-0.00142857	-0.0105	-0.00483333	0.005	-0.00316667	-0.00483333	-0.0218333	0.0095	0.0308333	-0.0145	-0.0186667	-0.008	0.0205	0.029	0.0218333
																					1.12	0			1.11	-0.031	-0.0094919	-0.00590909	0.01625	-0.0495833	-0.0235	-0.0235	-0.00666667	-0.00142857	-0.0105	-0.00483333	0.0383333	-0.00316667	0.0285	0.0781667	0.3095	-0.0025	0.0188333	-0.0186667	-0.008	-0.0128333	0.0956667	-0.0115
																					1.13	1			1.12	-0.031	-0.0094919	-0.00590909	-0.04625	-0.0495833	-0.0235	-0.0235	-0.00666667	-0.00142857	0.0395	-0.00483333	0.0716667	0.0301667	-0.00483333	-0.0218333	0.142833	-0.0025	-0.0145	-0.0186667	-0.008	-0.0128333	-0.00433333	0.0218333
																					1.14	0			1.13	-0.031	-0.0094919	-0.00590909	-0.04625	-0.0495833	-0.0235	-0.0235	-0.00666667	-0.00142857	-0.0105	-0.00483333	0.005	0.0301667	-0.00483333	-0.0218333	0.176167	-0.0025	0.0188333	-0.0186667	-0.008	0.0205	-0.00433333	-0.0115
																					1.15	1			1.14	-0.031	-0.0094919	-0.00590909	0.01625	-0.0495833	-0.0235	-0.0235	-0.00666667	-0.00142857	-0.0105	-0.00483333	0.0383333	0.0301667	-0.00483333	-0.0218333	0.1095	-0.0025	-0.0145	-0.0186667	-0.008	-0.0128333	-0.00433333	-0.0115
																					1.16	1			1.15	-0.031	-0.0094919	0.085	0.07875	-0.0495833	-0.0235	-0.0235	-0.00666667	-0.00142857	-0.0105	-0.00483333	-0.0283333	0.0301667	0.0285	0.0115	0.176167	-0.0025	0.0188333	-0.0186667	-0.008	-0.0128333	-0.00433333	0.0218333
																					1.17	0			1.16	-0.031	0.101619	0.085	-0.04625	-0.0495833	-0.0235	-0.0235	-0.00666667	-0.00142857	0.0145	-0.00483333	-0.0283333	-0.00316667	-0.00483333	0.0115	0.1095	-0.0025	-0.0145	0.0146667	-0.008	-0.0128333	0.0623333	-0.0115
																					1.18	0			1.17	-0.031	-0.0094919	-0.00590909	0.01625	-0.0495833	-0.0235	-0.0235	-0.00666667	-0.00142857	0.0145	-0.00483333	-0.0283333	-0.00316667	0.0285	-0.0218333	0.176167	-0.0025	-0.0145	-0.0186667	-0.008	-0.0128333	-0.0376667	-0.0115
																					1.19	0			1.18	-0.031	-0.0094919	-0.00590909	0.01625	-0.0495833	-0.0235	-0.0235	-0.00666667	-0.00142857	-0.0105	-0.00483333	0.0383333	-0.00316667	-0.00483333	-0.0218333	0.142833	-0.0025	0.0188333	-0.0186667	-0.008	0.0538333	-0.0376667	-0.0115
																					1.2	0			1.19	-0.031	-0.0094919	-0.00590909	-0.04625	-0.0495833	0.0765	0.0765	-0.00666667	-0.00142857	0.0145	-0.00483333	0.005	-0.00316667	-0.00483333	0.0115	0.0428333	-0.0025	0.0188333	-0.0186667	0.0253333	-0.0128333	-0.0376667	-0.0115
																					1.21	1			1.2	-0.031	-0.0094919	-0.00590909	-0.04625	-0.0495833	-0.0235	-0.0235	-0.00666667	0.141429	0.0145	-0.00483333	0.005	-0.00316667	-0.00483333	0.0448333	0.1095	0.0308333	0.0188333	-0.0186667	0.0253333	-0.0128333	0.029	-0.0115
																					1.22	0			1.21	-0.031	-0.0094919	-0.00590909	0.01625	-0.0495833	-0.0235	-0.0235	-0.00666667	-0.00142857	-0.0105	-0.00483333	0.0716667	-0.00316667	-0.00483333	0.0115	0.0761667	0.0308333	-0.0145	-0.0186667	-0.008	-0.0128333	0.129	0.0218333
																					1.23	1			1.22	-0.031	-0.0094919	-0.00590909	-0.04625	-0.0495833	-0.0235	-0.0235	-0.00666667	-0.00142857	0.0145	-0.00483333	0.0383333	0.0635	0.0285	-0.0218333	0.142833	-0.0025	-0.0145	-0.0186667	-0.008	-0.0128333	0.0623333	0.0218333
																					1.24	1			1.23	0.169	-0.0094919	0.085	0.01625	-0.0495833	-0.0235	-0.0235	-0.00666667	-0.00142857	-0.0105	-0.00483333	-0.0283333	-0.00316667	-0.00483333	-0.0218333	0.0428333	-0.0025	-0.0145	-0.0186667	-0.008	0.0871667	0.029	0.0551667
																					1.25	1			1.24	-0.031	-0.0094919	-0.00590909	-0.04625	-0.0495833	0.0765	0.0765	-0.00666667	-0.00142857	-0.0105	-0.00483333	-0.0283333	-0.00316667	-0.00483333	-0.0218333	-0.0238333	0.0641667	-0.0145	-0.0186667	-0.008	0.0538333	-0.00433333	-0.0115
																					1.26	0			1.25	-0.031	-0.0094919	0.085	0.07875	-0.0495833	-0.0235	-0.0235	-0.00666667	-0.00142857	-0.0105	-0.00483333	0.0383333	-0.00316667	-0.00483333	0.0781667	-0.0238333	-0.0025	-0.0145	-0.0186667	-0.008	-0.0128333	0.029	-0.0115
																					1.27	1			1.26	-0.031	-0.0094919	-0.00590909	-0.04625	-0.0495833	-0.0235	-0.0235	-0.00666667	-0.00142857	-0.0105	-0.00483333	-0.0283333	-0.00316667	-0.00483333	-0.0218333	0.0095	-0.0025	-0.0145	-0.0186667	0.0253333	0.0538333	-0.00433333	0.0218333
																					1.28	0			1.27	-0.031	-0.0094919	-0.00590909	-0.04625	-0.0495833	-0.0235	-0.0235	-0.00666667	-0.00142857	-0.0105	-0.00483333	0.005	-0.00316667	0.0285	0.0115	0.142833	-0.0025	-0.0145	-0.0186667	0.0253333	-0.0128333	0.029	-0.0115
																					1.29	0			1.28	-0.031	-0.0094919	-0.00590909	0.07875	-0.0495833	-0.0235	-0.0235	0.104444	-0.00142857	0.0145	-0.00483333	0.0383333	-0.00316667	-0.00483333	-0.0218333	0.0761667	-0.0025	0.0188333	-0.0186667	-0.008	-0.0128333	-0.00433333	-0.0115
																					1.3	0			1.29	-0.031	-0.0094919	-0.00590909	-0.04625	-0.0495833	-0.0235	-0.0235	-0.00666667	-0.00142857	-0.0105	-0.00483333	0.005	-0.00316667	-0.00483333	-0.0218333	0.0095	0.0308333	-0.0145	-0.0186667	-0.008	-0.0128333	0.029	-0.0115
																					1.31	0			1.3	-0.031	-0.0094919	0.085	0.07875	-0.0495833	-0.0235	-0.0235	0.104444	-0.00142857	-0.0105	-0.00483333	-0.0616667	-0.00316667	0.0285	-0.0218333	0.0428333	-0.0025	-0.0145	0.0146667	0.0253333	0.0538333	0.0623333	0.0218333
																					1.32	0			1.31	-0.031	-0.0094919	0.085	0.01625	-0.0495833	-0.0235	-0.0235	-0.00666667	-0.00142857	-0.0105	-0.00483333	0.005	-0.00316667	0.0285	-0.0218333	0.0095	-0.0025	0.0188333	0.048	0.0253333	0.0538333	-0.00433333	-0.0115
																					1.33	2			1.32	0.169	-0.0094919	-0.00590909	0.01625	-0.0495833	-0.0235	-0.0235	-0.00666667	-0.00142857	-0.0105	-0.00483333	0.105	-0.00316667	0.0285	-0.0218333	0.142833	-0.0025	0.0188333	0.0146667	0.0253333	0.0205	-0.00433333	-0.0115
																					1.34	2			1.33	-0.031	-0.0094919	-0.00590909	0.14125	-0.0495833	-0.0235	-0.0235	-0.00666667	-0.00142857	0.0145	-0.00483333	0.005	-0.00316667	0.0285	-0.0218333	0.0428333	0.0308333	-0.0145	0.0146667	0.0253333	0.0205	0.029	-0.0115
																					1.35	1			1.34	-0.031	-0.0094919	0.085	0.07875	-0.0495833	-0.0235	-0.0235	-0.00666667	-0.00142857	0.0145	-0.00483333	0.005	-0.00316667	-0.00483333	0.0115	0.176167	0.0308333	-0.0145	-0.0186667	-0.008	-0.0128333	-0.0376667	0.0218333
																					1.36	0			1.35	0.169	-0.0094919	-0.00590909	-0.04625	-0.0495833	-0.0235	-0.0235	-0.00666667	-0.00142857	0.0145	-0.00483333	0.005	-0.00316667	-0.00483333	-0.0218333	0.0428333	-0.0025	-0.0145	-0.0186667	-0.008	-0.0128333	0.0623333	-0.0115
																					1.37	1			1.36	-0.031	-0.0094919	-0.00590909	-0.04625	-0.0495833	-0.0235	-0.0235	-0.00666667	-0.00142857	0.0395	-0.00483333	-0.0283333	-0.00316667	0.0285	-0.0218333	-0.0238333	-0.0025	-0.0145	-0.0186667	0.0586667	0.0205	0.0623333	0.0218333
																					1.38	0			1.37	-0.031	-0.0094919	-0.00590909	0.01625	-0.0495833	-0.0235	-0.0235	-0.00666667	-0.00142857	0.0145	-0.00483333	0.005	0.0635	0.0285	-0.0218333	-0.0571667	-0.0025	0.0188333	-0.0186667	-0.008	-0.0128333	0.029	-0.0115
																					1.39	1			1.38	-0.031	-0.0094919	-0.00590909	0.01625	-0.0495833	-0.0235	-0.0235	-0.00666667	-0.00142857	-0.0105	-0.00483333	0.005	-0.00316667	-0.00483333	0.0115	0.1095	-0.0025	-0.0145	-0.0186667	-0.008	0.0205	0.0956667	0.0218333
																					1.4	0			1.39	-0.031	-0.0094919	-0.00590909	0.07875	-0.0495833	0.1765	0.1765	-0.00666667	-0.00142857	-0.0105	-0.00483333	0.005	-0.00316667	-0.00483333	0.0115	0.0428333	-0.0025	0.0188333	-0.0186667	0.0253333	-0.0128333	-0.00433333	-0.0115
																					1.41	2			1.4	-0.031	-0.0094919	-0.00590909	0.14125	-0.0495833	-0.0235	-0.0235	-0.00666667	-0.00142857	0.0145	-0.00483333	0.005	-0.00316667	-0.00483333	-0.0218333	-0.0238333	-0.0025	-0.0145	-0.0186667	-0.008	0.0205	0.0623333	-0.0115
																					1.42	0			1.41	-0.031	-0.0094919	-0.00590909	0.01625	-0.0495833	-0.0235	-0.0235	0.104444	-0.00142857	0.0145	-0.00483333	-0.0283333	-0.00316667	-0.00483333	-0.0218333	0.0095	-0.0025	0.0188333	-0.0186667	0.0253333	0.0538333	0.0623333	-0.0115
																					1.43	1			1.42	-0.031	-0.0094919	-0.00590909	-0.04625	-0.0495833	-0.0235	-0.0235	0.104444	-0.00142857	0.0145	-0.00483333	-0.0616667	-0.00316667	0.0285	-0.0218333	0.0095	-0.0025	-0.0145	-0.0186667	0.0586667	-0.0128333	0.0623333	0.0218333
																					1.44	0			1.43	-0.031	-0.0094919	0.085	0.01625	-0.0495833	-0.0235	-0.0235	-0.00666667	-0.00142857	0.0145	-0.00483333	0.005	-0.00316667	-0.00483333	0.0115	0.1095	-0.0025	-0.0145	-0.0186667	0.0253333	-0.0128333	0.162333	0.0218333
																					1.45	0			1.44	-0.031	-0.0094919	-0.00590909	0.07875	-0.0495833	-0.0235	-0.0235	0.104444	-0.00142857	0.0145	-0.00483333	-0.0283333	-0.00316667	-0.00483333	-0.0218333	0.176167	-0.0025	-0.0145	-0.0186667	-0.008	-0.0128333	0.029	0.0218333
																					1.46	0			1.45	-0.031	-0.0094919	-0.00590909	0.01625	-0.0495833	-0.0235	-0.0235	-0.00666667	-0.00142857	-0.0105	0.0285	0.0383333	-0.00316667	-0.00483333	-0.0218333	0.0428333	0.0641667	-0.0145	-0.0186667	-0.008	0.0205	-0.0376667	-0.0115
																					1.47	1			1.46	-0.031	-0.0094919	0.085	0.01625	-0.0495833	-0.0235	-0.0235	-0.00666667	-0.00142857	-0.0105	-0.00483333	0.105	-0.00316667	-0.00483333	-0.0218333	0.2095	-0.0025	-0.0145	-0.0186667	-0.008	0.0205	0.029	0.0218333
																					1.48	0			1.47	-0.031	-0.0094919	-0.00590909	0.07875	-0.0495833	-0.0235	-0.0235	-0.00666667	-0.00142857	0.0145	0.0285	0.005	0.0301667	0.0285	0.0115	0.0761667	-0.0025	-0.0145	-0.0186667	-0.008	0.0205	0.029	0.0218333
																					1.49	0			1.48	-0.031	-0.0094919	0.085	-0.04625	-0.0495833	-0.0235	-0.0235	-0.00666667	-0.00142857	0.0145	-0.00483333	0.0716667	-0.00316667	-0.00483333	-0.0218333	0.1095	-0.0025	0.0188333	-0.0186667	-0.008	-0.0128333	0.0623333	0.0218333
																					1.5	1			1.49	-0.031	-0.0094919	-0.00590909	0.07875	-0.0495833	-0.0235	-0.0235	-0.00666667	-0.00142857	-0.0105	-0.00483333	-0.0616667	-0.00316667	-0.00483333	0.0115	0.0761667	0.0641667	-0.0145	-0.0186667	-0.008	-0.0128333	0.029	-0.0115
																					1.51	1			1.5	-0.031	-0.0094919	-0.00590909	0.01625	-0.0495833	-0.0235	-0.0235	-0.00666667	-0.00142857	-0.0105	-0.00483333	0.0383333	-0.00316667	0.0285	-0.0218333	0.0428333	-0.0025	-0.0145	0.0146667	0.0586667	-0.0128333	-0.00433333	-0.0115
																					1.52	1			1.51	-0.031	-0.0094919	-0.00590909	0.07875	-0.0495833	-0.0235	-0.0235	-0.00666667	-0.00142857	0.0145	-0.00483333	-0.0283333	-0.00316667	-0.00483333	-0.0218333	-0.0571667	-0.0025	-0.0145	-0.0186667	0.0253333	0.0205	0.029	0.0551667
																					1.53	1			1.52	0.169	-0.0094919	-0.00590909	0.01625	-0.0495833	-0.0235	-0.0235	-0.00666667	-0.00142857	-0.0105	-0.00483333	0.0716667	-0.00316667	-0.00483333	-0.0218333	0.0095	0.0308333	0.0188333	0.0146667	-0.008	-0.0128333	-0.00433333	0.0218333
																					1.54	0			1.53	-0.031	-0.0094919	-0.00590909	0.07875	-0.0495833	-0.0235	-0.0235	0.104444	-0.00142857	-0.0105	-0.00483333	-0.0616667	0.0301667	-0.00483333	-0.0218333	-0.0238333	-0.0025	-0.0145	-0.0186667	-0.008	-0.0128333	0.129	-0.0115
																					1.55	0			1.54	-0.031	-0.0094919	-0.00590909	-0.04625	-0.0495833	-0.0235	-0.0235	0.104444	-0.00142857	-0.0105	-0.00483333	0.005	-0.00316667	-0.00483333	0.0115	0.0428333	-0.0025	0.0188333	-0.0186667	-0.008	0.0205	0.0623333	-0.0115
																					1.56	1			1.55	-0.031	-0.0094919	-0.00590909	-0.04625	-0.0495833	-0.0235	-0.0235	-0.00666667	-0.00142857	-0.0105	-0.00483333	0.0383333	-0.00316667	0.0285	0.0448333	0.0428333	0.0308333	-0.0145	0.0146667	-0.008	0.0538333	0.0956667	-0.0115
																					1.57	1			1.56	-0.031	-0.0094919	-0.00590909	0.07875	-0.0495833	0.0765	0.0765	-0.00666667	-0.00142857	0.0145	-0.00483333	0.005	-0.00316667	-0.00483333	-0.0218333	0.142833	0.0308333	-0.0145	-0.0186667	-0.008	-0.0128333	-0.00433333	-0.0115
																					1.58	0			1.57	-0.031	-0.0094919	-0.00590909	-0.04625	-0.0495833	-0.0235	-0.0235	-0.00666667	-0.00142857	0.0145	0.0285	-0.0283333	-0.00316667	-0.00483333	-0.0218333	0.176167	-0.0025	-0.0145	0.048	-0.008	-0.0128333	0.029	0.0218333
																					1.59	0			1.58	-0.031	-0.0094919	-0.00590909	0.07875	-0.0495833	-0.0235	-0.0235	-0.00666667	-0.00142857	-0.0105	-0.00483333	0.005	-0.00316667	-0.00483333	-0.0218333	0.1095	-0.0025	-0.0145	-0.0186667	0.0253333	-0.0128333	0.0956667	0.0218333
																					1.6	1			1.59	0.169	-0.0094919	-0.00590909	-0.04625	-0.0495833	-0.0235	-0.0235	-0.00666667	-0.00142857	0.0145	-0.00483333	-0.0283333	0.0301667	-0.00483333	0.0115	0.1095	-0.0025	-0.0145	-0.0186667	-0.008	0.0205	-0.00433333	-0.0115
																					1.61	0			1.6	-0.031	-0.0094919	-0.00590909	0.01625	-0.0495833	-0.0235	-0.0235	0.104444	-0.00142857	-0.0105	0.0618333	-0.0616667	-0.00316667	0.0285	-0.0218333	0.1095	-0.0025	-0.0145	-0.0186667	-0.008	0.0538333	-0.00433333	-0.0115
																					1.62	1			1.61	-0.031	-0.0094919	-0.00590909	-0.04625	-0.0495833	-0.0235	-0.0235	-0.00666667	-0.00142857	-0.0105	-0.00483333	0.0383333	-0.00316667	-0.00483333	-0.0218333	0.0428333	-0.0025	0.0188333	-0.0186667	-0.008	0.0205	-0.00433333	-0.0115
																					1.63	0			1.62	-0.031	-0.0094919	-0.00590909	0.07875	-0.0495833	-0.0235	-0.0235	-0.00666667	-0.00142857	0.0145	0.0285	0.005	-0.00316667	-0.00483333	-0.0218333	-0.0238333	-0.0025	0.0188333	0.0146667	0.0253333	0.0205	-0.00433333	-0.0115
																					1.64	0			1.63	-0.031	-0.0094919	-0.00590909	0.07875	-0.0495833	-0.0235	-0.0235	-0.00666667	-0.00142857	-0.0105	-0.00483333	-0.0283333	-0.00316667	-0.00483333	-0.0218333	0.0761667	-0.0025	-0.0145	-0.0186667	-0.008	-0.0128333	-0.00433333	-0.0115
																					1.65	0			1.64	-0.031	-0.0094919	-0.00590909	0.01625	-0.0495833	-0.0235	-0.0235	0.104444	-0.00142857	-0.0105	-0.00483333	-0.0283333	-0.00316667	0.0285	-0.0218333	-0.0571667	-0.0025	-0.0145	-0.0186667	0.0586667	-0.0128333	-0.00433333	0.0218333
																					1.66	0			1.65	-0.031	-0.0094919	-0.00590909	0.07875	-0.0495833	-0.0235	-0.0235	-0.00666667	-0.00142857	-0.0105	-0.00483333	0.005	-0.00316667	0.0285	-0.0218333	-0.0238333	0.0308333	-0.0145	-0.0186667	-0.008	-0.0128333	0.0623333	-0.0115
																					1.67	2			1.66	-0.031	-0.0094919	0.085	0.01625	-0.0495833	-0.0235	-0.0235	-0.00666667	-0.00142857	0.0145	-0.00483333	0.005	0.0301667	0.0285	0.0115	0.0095	-0.0025	-0.0145	-0.0186667	-0.008	0.0205	-0.0376667	-0.0115
																					1.68	0			1.67	-0.031	-0.0094919	-0.00590909	0.07875	-0.0495833	-0.0235	-0.0235	-0.00666667	-0.00142857	0.0145	-0.00483333	-0.0616667	-0.00316667	-0.00483333	0.0115	0.0761667	-0.0025	-0.0145	-0.0186667	-0.008	-0.0128333	0.0623333	0.0218333
																					1.69	1			1.68	-0.031	-0.0094919	0.085	0.01625	-0.0495833	-0.0235	-0.0235	-0.00666667	-0.00142857	-0.0105	-0.00483333	-0.0283333	-0.00316667	-0.00483333	0.0115	0.0428333	-0.0025	-0.0145	-0.0186667	-0.008	0.0205	0.0623333	-0.0115
																					1.7	1			1.69	-0.031	-0.0094919	-0.00590909	0.14125	-0.0495833	-0.0235	-0.0235	-0.00666667	-0.00142857	-0.0105	-0.00483333	-0.0283333	-0.00316667	0.0285	-0.0218333	0.2095	-0.0025	-0.0145	-0.0186667	-0.008	-0.0128333	-0.00433333	-0.0115
																					1.71	0			1.7	0.169	-0.0094919	-0.00590909	-0.04625	-0.0495833	-0.0235	-0.0235	-0.00666667	-0.00142857	-0.0105	-0.00483333	0.0716667	-0.00316667	-0.00483333	-0.0218333	0.142833	0.0308333	-0.0145	-0.0186667	-0.008	-0.0128333	0.162333	-0.0115
																					1.72	2			1.71	0.169	-0.0094919	-0.00590909	0.01625	-0.0495833	-0.0235	-0.0235	-0.00666667	-0.00142857	0.0145	-0.00483333	0.005	0.0301667	0.0285	-0.0218333	0.0095	-0.0025	-0.0145	0.0146667	-0.008	-0.0128333	0.0623333	-0.0115
																					1.73	1			1.72	-0.031	-0.0094919	0.085	-0.04625	-0.0495833	-0.0235	-0.0235	0.104444	-0.00142857	0.0395	-0.00483333	-0.0283333	0.0301667	0.0285	-0.0218333	0.0428333	-0.0025	0.0188333	-0.0186667	-0.008	0.0205	0.0623333	-0.0115
																					1.74	0			1.73	-0.031	-0.0094919	-0.00590909	-0.04625	-0.0495833	-0.0235	-0.0235	-0.00666667	-0.00142857	0.0145	-0.00483333	-0.0283333	-0.00316667	-0.00483333	-0.0218333	0.176167	-0.0025	-0.0145	-0.0186667	0.0253333	-0.0128333	-0.00433333	-0.0115
																					1.75	1			1.74	0.169	-0.0094919	-0.00590909	-0.04625	-0.0495833	-0.0235	-0.0235	-0.00666667	-0.00142857	-0.0105	-0.00483333	0.005	0.0301667	-0.00483333	-0.0218333	0.142833	0.0308333	-0.0145	0.0146667	-0.008	0.0205	0.0623333	-0.0115
																					1.76	0			1.75	-0.031	-0.0094919	-0.00590909	0.01625	-0.0495833	-0.0235	-0.0235	-0.00666667	-0.00142857	-0.0105	-0.00483333	0.005	-0.00316667	-0.00483333	0.0115	0.0095	-0.0025	-0.0145	0.0146667	-0.008	-0.0128333	0.0623333	-0.0115
																					1.77	1			1.76	-0.031	0.101619	-0.00590909	0.01625	-0.0495833	-0.0235	-0.0235	-0.00666667	-0.00142857	-0.0105	-0.00483333	-0.0283333	0.0301667	-0.00483333	-0.0218333	0.1095	-0.0025	0.0188333	0.0146667	-0.008	-0.0128333	0.029	-0.0115
																					1.78	0			1.77	-0.031	-0.0094919	-0.00590909	-0.04625	-0.0495833	-0.0235	-0.0235	-0.00666667	-0.00142857	-0.0105	-0.00483333	-0.0283333	-0.00316667	-0.00483333	-0.0218333	0.0761667	-0.0025	-0.0145	0.0146667	-0.008	0.0871667	-0.00433333	-0.0115
																					1.79	0			1.78	-0.031	-0.0094919	0.085	-0.04625	-0.0495833	-0.0235	-0.0235	-0.00666667	-0.00142857	0.0395	-0.00483333	-0.0283333	-0.00316667	-0.00483333	-0.0218333	0.0428333	-0.0025	-0.0145	-0.0186667	0.0253333	-0.0128333	-0.00433333	-0.0115
																					1.8	0			1.79	-0.031	-0.0094919	-0.00590909	-0.04625	-0.0495833	-0.0235	-0.0235	-0.00666667	-0.00142857	-0.0105	-0.00483333	-0.0283333	-0.00316667	-0.00483333	-0.0218333	0.0761667	0.0308333	-0.0145	0.0146667	-0.008	0.0205	0.029	-0.0115
																					1.81	1			1.8	-0.031	-0.0094919	-0.00590909	0.01625	-0.0495833	-0.0235	-0.0235	-0.00666667	-0.00142857	-0.0105	-0.00483333	0.0383333	0.0301667	-0.00483333	-0.0218333	-0.0571667	0.0308333	-0.0145	-0.0186667	-0.008	0.0205	0.0623333	-0.0115
																					1.82	1			1.81	-0.031	-0.0094919	-0.00590909	0.01625	-0.0495833	-0.0235	-0.0235	-0.00666667	-0.00142857	-0.0105	-0.00483333	-0.0283333	-0.00316667	-0.00483333	-0.0218333	0.0095	-0.0025	-0.0145	0.0146667	-0.008	-0.0128333	-0.0376667	-0.0115
																					1.83	1			1.82	-0.031	-0.0094919	-0.00590909	0.07875	-0.0495833	-0.0235	-0.0235	-0.00666667	-0.00142857	0.0145	-0.00483333	0.0716667	-0.00316667	-0.00483333	0.0115	-0.0238333	0.0308333	-0.0145	-0.0186667	-0.008	0.0538333	0.029	0.0218333
																					1.84	0			1.83	-0.031	-0.0094919	-0.00590909	0.07875	-0.0495833	-0.0235	-0.0235	-0.00666667	-0.00142857	-0.0105	-0.00483333	-0.0283333	-0.00316667	-0.00483333	0.0115	-0.0905	-0.0025	-0.0145	-0.0186667	-0.008	0.0538333	-0.00433333	0.0218333
																					1.85	0			1.84	-0.031	-0.0094919	-0.00590909	-0.04625	-0.0495833	-0.0235	-0.0235	-0.00666667	-0.00142857	-0.0105	-0.00483333	-0.0283333	-0.00316667	-0.00483333	0.0115	-0.0571667	-0.0025	-0.0145	-0.0186667	-0.008	0.0205	0.029	-0.0115
																					1.86	0			1.85	-0.031	-0.0094919	-0.00590909	0.07875	-0.0495833	0.0765	0.0765	-0.00666667	-0.00142857	-0.0105	0.0285	0.0383333	-0.00316667	-0.00483333	-0.0218333	0.0095	-0.0025	0.0188333	-0.0186667	-0.008	-0.0128333	-0.00433333	-0.0115
																					1.87	1			1.86	-0.031	-0.0094919	-0.00590909	0.01625	-0.0495833	-0.0235	-0.0235	-0.00666667	-0.00142857	-0.0105	-0.00483333	-0.0283333	0.0301667	-0.00483333	0.0448333	-0.0238333	-0.0025	-0.0145	-0.0186667	-0.008	-0.0128333	0.029	-0.0115
																					1.88	0			1.87	0.369	-0.0094919	0.175909	0.01625	-0.0495833	-0.0235	-0.0235	-0.00666667	-0.00142857	-0.0105	-0.00483333	-0.0283333	-0.00316667	-0.00483333	-0.0218333	-0.0571667	-0.0025	-0.0145	-0.0186667	-0.008	-0.0128333	0.0623333	0.0218333
																					1.89	1			1.88	-0.031	-0.0094919	-0.00590909	-0.04625	-0.0495833	-0.0235	-0.0235	-0.00666667	-0.00142857	0.0145	-0.00483333	0.0716667	-0.00316667	-0.00483333	0.0115	-0.0571667	-0.0025	-0.0145	-0.0186667	0.0253333	-0.0128333	-0.00433333	-0.0115
																					1.9	0			1.89	0.369	-0.0094919	-0.00590909	0.01625	-0.0495833	-0.0235	-0.0235	-0.00666667	-0.00142857	-0.0105	-0.00483333	-0.0283333	-0.00316667	-0.00483333	-0.0218333	-0.0238333	-0.0025	-0.0145	-0.0186667	-0.008	-0.0128333	-0.00433333	-0.0115
																					1.91	0			1.9	-0.031	-0.0094919	-0.00590909	-0.04625	-0.0495833	-0.0235	-0.0235	-0.00666667	-0.00142857	-0.0105	-0.00483333	0.0383333	-0.00316667	-0.00483333	-0.0218333	-0.0571667	-0.0025	-0.0145	-0.0186667	-0.008	-0.0128333	0.0623333	-0.0115
																					1.92	2			1.91	-0.031	-0.0094919	-0.00590909	0.01625	-0.0495833	-0.0235	-0.0235	-0.00666667	-0.00142857	-0.0105	-0.00483333	0.005	0.0301667	-0.00483333	0.0115	-0.0571667	-0.0025	-0.0145	-0.0186667	-0.008	0.0205	-0.00433333	0.0218333
																					1.93	0			1.92	-0.031	-0.0094919	0.175909	0.01625	-0.0495833	-0.0235	-0.0235	-0.00666667	-0.00142857	0.0145	-0.00483333	-0.0616667	0.0301667	-0.00483333	0.0115	-0.0905	-0.0025	-0.0145	-0.0186667	0.0253333	0.0205	0.029	-0.0115
																					1.94	0			1.93	-0.031	-0.0094919	-0.00590909	-0.04625	-0.0495833	-0.0235	-0.0235	-0.00666667	-0.00142857	0.0145	-0.00483333	0.0383333	-0.00316667	-0.00483333	-0.0218333	-0.0571667	0.0641667	-0.0145	-0.0186667	-0.008	0.0205	-0.00433333	-0.0115
																					1.95	1			1.94	0.169	-0.0094919	-0.00590909	0.01625	-0.0495833	-0.0235	-0.0235	-0.00666667	-0.00142857	0.0145	-0.00483333	-0.0616667	-0.00316667	-0.00483333	-0.0218333	0.0428333	-0.0025	-0.0145	-0.0186667	-0.008	-0.0128333	0.129	-0.0115
																					1.96	1			1.95	-0.031	-0.0094919	-0.00590909	0.01625	-0.0495833	-0.0235	-0.0235	-0.00666667	-0.00142857	0.0145	-0.00483333	0.005	-0.00316667	-0.00483333	0.0448333	-0.0571667	-0.0025	-0.0145	-0.0186667	-0.008	-0.0128333	-0.0376667	0.0218333
																					1.97	0			1.96	-0.031	0.101619	-0.00590909	0.07875	-0.0495833	-0.0235	-0.0235	-0.00666667	-0.00142857	-0.0105	-0.00483333	0.005	-0.00316667	-0.00483333	-0.0218333	0.0095	-0.0025	-0.0145	0.0146667	-0.008	0.0205	0.029	-0.0115
																					1.98	1			1.97	-0.031	-0.0094919	-0.00590909	0.07875	-0.0495833	-0.0235	-0.0235	-0.00666667	-0.00142857	-0.0105	-0.00483333	0.0716667	-0.00316667	-0.00483333	-0.0218333	0.142833	0.0308333	-0.0145	-0.0186667	0.0253333	-0.0128333	-0.00433333	-0.0115
																					1.99	1			1.98	-0.031	0.101619	-0.00590909	-0.04625	-0.0495833	-0.0235	-0.0235	-0.00666667	-0.00142857	-0.0105	-0.00483333	-0.0616667	0.0635	-0.00483333	-0.0218333	0.0428333	0.0308333	-0.0145	-0.0186667	-0.008	0.0538333	-0.00433333	-0.0115
																					2	1			1.99	-0.031	-0.0094919	0.085	-0.04625	-0.0495833	-0.0235	-0.0235	-0.00666667	-0.00142857	-0.0105	-0.00483333	0.005	-0.00316667	-0.00483333	-0.0218333	0.1095	-0.0025	-0.0145	-0.0186667	0.0253333	-0.0128333	-0.0376667	-0.0115
																					2.01	0			2	-0.031	-0.0094919	-0.00590909	-0.04625	-0.0495833	-0.0235	-0.0235	-0.00666667	-0.00142857	0.0145	-0.00483333	-0.0283333	-0.00316667	-0.00483333	-0.0218333	0.0761667	-0.0025	0.0188333	-0.0186667	-0.008	-0.0128333	0.029	-0.0115
																					2.02	0			2.01	-0.031	-0.0094919	-0.00590909	0.01625	-0.0495833	-0.0235	-0.0235	0.104444	-0.00142857	-0.0105	-0.00483333	-0.0616667	-0.00316667	0.0285	0.0115	0.142833	-0.0025	-0.0145	-0.0186667	-0.008	0.0538333	0.029	-0.0115
																					2.03	2			2.02	-0.031	-0.0094919	-0.00590909	0.01625	-0.0495833	-0.0235	-0.0235	-0.00666667	-0.00142857	0.0145	-0.00483333	0.0716667	-0.00316667	-0.00483333	-0.0218333	0.176167	-0.0025	-0.0145	-0.0186667	0.0253333	0.0205	0.0623333	-0.0115
																					2.04	1			2.03	-0.031	-0.0094919	-0.00590909	0.01625	-0.0495833	-0.0235	-0.0235	-0.00666667	-0.00142857	-0.0105	-0.00483333	0.005	-0.00316667	-0.00483333	0.0115	0.176167	-0.0025	0.0188333	-0.0186667	-0.008	-0.0128333	-0.0376667	0.0218333
																					2.05	0			2.04	-0.031	-0.0094919	0.085	0.01625	-0.0495833	-0.0235	-0.0235	-0.00666667	-0.00142857	-0.0105	-0.00483333	0.105	-0.00316667	-0.00483333	-0.0218333	-0.0571667	-0.0025	0.0188333	-0.0186667	-0.008	-0.0128333	-0.00433333	0.0218333
																					2.06	1			2.05	0.169	-0.0094919	-0.00590909	-0.04625	-0.0495833	-0.0235	-0.0235	-0.00666667	-0.00142857	0.0145	-0.00483333	0.005	-0.00316667	-0.00483333	-0.0218333	0.0095	-0.0025	-0.0145	-0.0186667	0.0253333	-0.0128333	0.029	0.0218333
																					2.07	0			2.06	-0.031	-0.0094919	-0.00590909	0.01625	-0.0495833	0.0765	0.0765	-0.00666667	-0.00142857	-0.0105	-0.00483333	-0.0616667	-0.00316667	-0.00483333	-0.0218333	0.0428333	0.0308333	0.0521667	-0.0186667	-0.008	0.0871667	-0.00433333	-0.0115
																					2.08	1			2.07	-0.031	-0.0094919	-0.00590909	-0.04625	-0.0495833	-0.0235	-0.0235	-0.00666667	-0.00142857	-0.0105	-0.00483333	-0.0616667	-0.00316667	0.0285	-0.0218333	0.0761667	0.0308333	-0.0145	0.0146667	0.0253333	-0.0128333	-0.00433333	-0.0115
																					2.09	0			2.08	-0.031	-0.0094919	-0.00590909	-0.04625	-0.0495833	-0.0235	-0.0235	-0.00666667	-0.00142857	-0.0105	-0.00483333	0.0383333	0.0301667	-0.00483333	0.0115	0.0095	-0.0025	0.0188333	-0.0186667	0.0253333	0.0205	0.029	-0.0115
																					2.1	0			2.09	-0.031	-0.0094919	-0.00590909	0.01625	-0.0495833	-0.0235	-0.0235	-0.00666667	-0.00142857	0.0395	-0.00483333	0.0383333	-0.00316667	-0.00483333	-0.0218333	0.0428333	-0.0025	-0.0145	-0.0186667	0.0253333	0.0205	0.029	-0.0115
																					2.11	1			2.1	-0.031	-0.0094919	-0.00590909	0.01625	-0.0495833	-0.0235	-0.0235	-0.00666667	-0.00142857	-0.0105	-0.00483333	0.0383333	-0.00316667	-0.00483333	0.0448333	-0.0238333	-0.0025	0.0188333	-0.0186667	-0.008	0.0205	-0.0376667	-0.0115
																					2.12	0			2.11	-0.031	-0.0094919	-0.00590909	0.01625	-0.0495833	-0.0235	-0.0235	-0.00666667	0.141429	-0.0105	-0.00483333	0.0716667	-0.00316667	-0.00483333	-0.0218333	-0.0571667	-0.0025	0.0521667	-0.0186667	-0.008	0.0205	-0.00433333	-0.0115
																					2.13	1			2.12	-0.031	-0.0094919	-0.00590909	0.01625	-0.0495833	-0.0235	-0.0235	-0.00666667	-0.00142857	0.0395	-0.00483333	0.005	-0.00316667	0.0285	0.0115	-0.0238333	-0.0025	-0.0145	-0.0186667	-0.008	0.0205	-0.00433333	-0.0115
																					2.14	1			2.13	-0.031	-0.0094919	-0.00590909	0.01625	-0.0495833	-0.0235	-0.0235	-0.00666667	-0.00142857	0.0145	-0.00483333	0.0383333	0.0301667	0.0285	-0.0218333	-0.0905	-0.0025	-0.0145	-0.0186667	-0.008	0.0205	-0.00433333	0.0218333
																					2.15	0			2.14	-0.031	-0.0094919	0.085	-0.04625	0.03375	-0.0235	-0.0235	-0.00666667	-0.00142857	-0.0105	-0.00483333	-0.0283333	-0.00316667	-0.00483333	-0.0218333	0.0761667	-0.0025	-0.0145	-0.0186667	0.0253333	0.0538333	0.0956667	0.0551667
																					2.16	1			2.15	-0.031	-0.0094919	-0.00590909	-0.04625	-0.0495833	-0.0235	-0.0235	-0.00666667	-0.00142857	-0.0105	-0.00483333	-0.0283333	0.0301667	-0.00483333	0.0115	-0.0238333	-0.0025	-0.0145	-0.0186667	-0.008	-0.0128333	0.0956667	-0.0115
																					2.17	0			2.16	-0.031	-0.0094919	-0.00590909	0.01625	-0.0495833	-0.0235	-0.0235	-0.00666667	-0.00142857	-0.0105	-0.00483333	-0.0283333	-0.00316667	-0.00483333	-0.0218333	0.1095	0.0308333	-0.0145	0.0146667	-0.008	-0.0128333	-0.00433333	-0.0115
																					2.18	2			2.17	0.169	-0.0094919	-0.00590909	-0.04625	-0.0495833	-0.0235	-0.0235	-0.00666667	-0.00142857	-0.0105	-0.00483333	-0.0283333	-0.00316667	0.0285	0.0115	0.0428333	-0.0025	-0.0145	-0.0186667	-0.008	-0.0128333	0.029	-0.0115
																					2.19	0			2.18	-0.031	-0.0094919	0.085	-0.04625	-0.0495833	-0.0235	-0.0235	-0.00666667	-0.00142857	0.0145	-0.00483333	-0.0616667	-0.00316667	-0.00483333	-0.0218333	0.1095	-0.0025	-0.0145	-0.0186667	-0.008	0.0205	0.029	0.0218333
																					2.2	0			2.19	-0.031	-0.0094919	-0.00590909	-0.04625	-0.0495833	-0.0235	-0.0235	-0.00666667	-0.00142857	-0.0105	-0.00483333	0.0383333	-0.00316667	-0.00483333	-0.0218333	0.0095	-0.0025	-0.0145	-0.0186667	-0.008	-0.0128333	0.029	-0.0115
																					2.21	0			2.2	-0.031	-0.0094919	-0.00590909	-0.04625	-0.0495833	-0.0235	-0.0235	-0.00666667	-0.00142857	-0.0105	-0.00483333	0.138333	-0.00316667	-0.00483333	0.0115	0.0095	0.0308333	0.0188333	0.048	-0.008	-0.0128333	-0.00433333	-0.0115
																					2.22	1			2.21	-0.031	-0.0094919	-0.00590909	0.14125	-0.0495833	0.0765	0.0765	-0.00666667	-0.00142857	0.0145	-0.00483333	0.005	-0.00316667	-0.00483333	0.0115	0.0428333	-0.0025	0.0855	-0.0186667	0.0253333	-0.0128333	0.0623333	-0.0115
																					2.23	0			2.22	0.169	-0.0094919	0.085	0.01625	-0.0495833	0.0765	0.0765	-0.00666667	-0.00142857	-0.0105	-0.00483333	0.0383333	-0.00316667	0.0285	-0.0218333	0.0428333	-0.0025	-0.0145	-0.0186667	-0.008	0.0205	0.0623333	-0.0115
																					2.24	0			2.23	-0.031	-0.0094919	-0.00590909	0.01625	-0.0495833	-0.0235	-0.0235	-0.00666667	-0.00142857	-0.0105	-0.00483333	0.005	-0.00316667	-0.00483333	-0.0218333	0.1095	-0.0025	-0.0145	-0.0186667	-0.008	-0.0128333	0.029	-0.0115
																					2.25	0			2.24	-0.031	-0.0094919	-0.00590909	-0.04625	-0.0495833	-0.0235	-0.0235	-0.00666667	-0.00142857	0.0395	-0.00483333	0.005	0.0635	0.0618333	0.0448333	0.0428333	-0.0025	-0.0145	-0.0186667	0.0253333	-0.0128333	0.029	-0.0115
																					2.26	1			2.25	-0.031	-0.0094919	0.085	0.01625	-0.0495833	-0.0235	-0.0235	-0.00666667	-0.00142857	-0.0105	-0.00483333	-0.0283333	-0.00316667	-0.00483333	-0.0218333	-0.0905	0.0308333	0.0188333	-0.0186667	-0.008	-0.0128333	-0.00433333	0.0218333
																					2.27	1			2.26	-0.031	-0.0094919	-0.00590909	0.01625	-0.0495833	-0.0235	-0.0235	-0.00666667	-0.00142857	0.0145	-0.00483333	0.005	-0.00316667	-0.00483333	0.0115	0.1095	0.0308333	0.0521667	-0.0186667	-0.008	-0.0128333	-0.00433333	-0.0115
																					2.28	0			2.27	-0.031	-0.0094919	-0.00590909	0.01625	-0.0495833	-0.0235	-0.0235	-0.00666667	-0.00142857	-0.0105	-0.00483333	0.0716667	-0.00316667	0.0285	0.0115	0.0095	-0.0025	-0.0145	-0.0186667	0.0253333	0.0538333	-0.00433333	-0.0115
																					2.29	1			2.28	0.169	-0.0094919	0.085	0.01625	-0.0495833	-0.0235	-0.0235	-0.00666667	-0.00142857	-0.0105	-0.00483333	0.0383333	-0.00316667	0.0285	0.0115	0.0761667	-0.0025	-0.0145	-0.0186667	-0.008	0.0205	-0.0376667	-0.0115
																					2.3	0			2.29	-0.031	-0.0094919	-0.00590909	0.01625	-0.0495833	-0.0235	-0.0235	0.104444	-0.00142857	-0.0105	-0.00483333	0.005	-0.00316667	-0.00483333	-0.0218333	0.1095	-0.0025	-0.0145	-0.0186667	-0.008	0.0205	-0.0376667	0.0218333
																					2.31	0			2.3	-0.031	-0.0094919	-0.00590909	-0.04625	-0.0495833	-0.0235	-0.0235	-0.00666667	-0.00142857	-0.0105	-0.00483333	0.0716667	-0.00316667	-0.00483333	-0.0218333	-0.0238333	-0.0025	-0.0145	-0.0186667	-0.008	-0.0128333	-0.00433333	0.0218333
																					2.32	0			2.31	-0.031	-0.0094919	-0.00590909	0.01625	-0.0495833	0.0765	0.0765	-0.00666667	-0.00142857	0.0145	-0.00483333	0.0716667	-0.00316667	-0.00483333	0.0115	-0.0238333	0.0308333	-0.0145	-0.0186667	-0.008	0.0205	-0.0376667	-0.0115
																					2.33	0			2.32	-0.031	-0.0094919	-0.00590909	0.01625	-0.0495833	-0.0235	-0.0235	-0.00666667	-0.00142857	-0.0105	-0.00483333	-0.0616667	-0.00316667	-0.00483333	-0.0218333	0.0428333	0.0308333	-0.0145	-0.0186667	-0.008	0.0205	-0.00433333	0.0218333
																					2.34	0			2.33	-0.031	-0.0094919	0.085	-0.04625	-0.0495833	-0.0235	-0.0235	-0.00666667	-0.00142857	-0.0105	-0.00483333	0.005	-0.00316667	0.0285	-0.0218333	0.0428333	-0.0025	0.0188333	-0.0186667	-0.008	-0.0128333	-0.00433333	-0.0115
																					2.35	0			2.34	-0.031	-0.0094919	-0.00590909	0.01625	-0.0495833	-0.0235	-0.0235	-0.00666667	-0.00142857	-0.0105	-0.00483333	0.005	0.0301667	-0.00483333	-0.0218333	-0.0238333	-0.0025	0.0188333	-0.0186667	-0.008	-0.0128333	0.0623333	-0.0115
																					2.36	2			2.35	-0.031	-0.0094919	-0.00590909	-0.04625	-0.0495833	-0.0235	-0.0235	-0.00666667	-0.00142857	0.0645	-0.00483333	-0.0616667	0.0301667	-0.00483333	-0.0218333	0.0428333	0.0308333	0.0521667	-0.0186667	-0.008	-0.0128333	-0.00433333	-0.0115
																					2.37	3			2.36	-0.031	-0.0094919	-0.00590909	-0.04625	-0.0495833	-0.0235	-0.0235	-0.00666667	-0.00142857	-0.0105	-0.00483333	0.105	-0.00316667	-0.00483333	-0.0218333	-0.0238333	0.0308333	-0.0145	0.0146667	-0.008	-0.0128333	0.029	-0.0115
																					2.38	0			2.37	-0.031	-0.0094919	-0.00590909	0.01625	-0.0495833	0.0765	0.0765	-0.00666667	-0.00142857	-0.0105	-0.00483333	-0.0283333	-0.00316667	-0.00483333	-0.0218333	-0.0238333	0.0308333	-0.0145	-0.0186667	-0.008	-0.0128333	-0.00433333	-0.0115
																					2.39	0			2.38	-0.031	-0.0094919	-0.00590909	-0.04625	-0.0495833	-0.0235	-0.0235	-0.00666667	-0.00142857	-0.0105	-0.00483333	-0.0283333	-0.00316667	0.0285	-0.0218333	-0.0571667	-0.0025	-0.0145	-0.0186667	-0.008	-0.0128333	-0.0376667	-0.0115
																					2.4	1			2.39	-0.031	-0.0094919	-0.00590909	0.14125	-0.0495833	-0.0235	-0.0235	-0.00666667	-0.00142857	0.0145	-0.00483333	-0.0616667	-0.00316667	-0.00483333	-0.0218333	0.0428333	-0.0025	-0.0145	0.048	0.0253333	-0.0128333	-0.00433333	0.0218333
																					2.41	1			2.4	-0.031	-0.0094919	-0.00590909	-0.04625	0.03375	-0.0235	-0.0235	-0.00666667	-0.00142857	0.0145	-0.00483333	0.0716667	-0.00316667	-0.00483333	-0.0218333	0.0428333	-0.0025	0.0188333	-0.0186667	-0.008	-0.0128333	-0.0376667	0.0218333
																					2.42	0			2.41	-0.031	-0.0094919	-0.00590909	0.01625	-0.0495833	-0.0235	-0.0235	-0.00666667	-0.00142857	0.0145	-0.00483333	0.0716667	-0.00316667	-0.00483333	-0.0218333	0.1095	-0.0025	-0.0145	0.0146667	-0.008	-0.0128333	-0.00433333	-0.0115
																					2.43	0			2.42	0.169	-0.0094919	-0.00590909	-0.04625	-0.0495833	-0.0235	-0.0235	-0.00666667	-0.00142857	-0.0105	-0.00483333	0.0383333	-0.00316667	-0.00483333	0.0115	-0.0238333	-0.0025	-0.0145	-0.0186667	0.0253333	0.0205	0.029	-0.0115
																					2.44	0			2.43	-0.031	-0.0094919	0.085	0.01625	-0.0495833	-0.0235	-0.0235	-0.00666667	-0.00142857	-0.0105	-0.00483333	0.005	-0.00316667	-0.00483333	0.0115	-0.0571667	-0.0025	-0.0145	-0.0186667	-0.008	-0.0128333	-0.00433333	0.0551667
																					2.45	1			2.44	-0.031	-0.0094919	-0.00590909	0.01625	-0.0495833	-0.0235	-0.0235	-0.00666667	-0.00142857	-0.0105	-0.00483333	0.0716667	0.0301667	0.0285	0.0115	-0.0905	-0.0025	-0.0145	-0.0186667	-0.008	-0.0128333	-0.00433333	-0.0115
																					2.46	1			2.45	-0.031	-0.0094919	0.085	-0.04625	0.03375	-0.0235	-0.0235	-0.00666667	-0.00142857	0.0145	-0.00483333	-0.0283333	-0.00316667	-0.00483333	-0.0218333	-0.0905	-0.0025	-0.0145	-0.0186667	-0.008	0.0205	-0.0376667	0.0218333
																					2.47	0			2.46	-0.031	-0.0094919	-0.00590909	-0.04625	-0.0495833	-0.0235	-0.0235	-0.00666667	-0.00142857	-0.0105	-0.00483333	0.005	-0.00316667	-0.00483333	0.0115	-0.0238333	-0.0025	-0.0145	0.0146667	-0.008	-0.0128333	-0.0376667	-0.0115
																					2.48	1			2.47	-0.031	-0.0094919	-0.00590909	0.07875	-0.0495833	-0.0235	-0.0235	-0.00666667	-0.00142857	-0.0105	-0.00483333	-0.0283333	-0.00316667	-0.00483333	0.0115	0.0761667	0.0308333	-0.0145	0.0146667	-0.008	0.0205	0.029	-0.0115
																					2.49	0			2.48	0.169	-0.0094919	-0.00590909	-0.04625	-0.0495833	0.0765	0.0765	-0.00666667	-0.00142857	-0.0105	-0.00483333	0.171667	-0.00316667	0.0285	-0.0218333	-0.0238333	-0.0025	-0.0145	0.0146667	-0.008	-0.0128333	-0.00433333	-0.0115
																					2.5	1			2.49	-0.031	-0.0094919	-0.00590909	-0.04625	-0.0495833	0.0765	0.0765	-0.00666667	-0.00142857	-0.0105	-0.00483333	-0.0616667	-0.00316667	-0.00483333	-0.0218333	-0.0238333	-0.0025	-0.0145	0.0146667	0.0253333	-0.0128333	-0.0376667	-0.0115
																					2.51	1			2.5	-0.031	-0.0094919	-0.00590909	-0.04625	-0.0495833	-0.0235	-0.0235	-0.00666667	-0.00142857	-0.0105	-0.00483333	0.0383333	-0.00316667	-0.00483333	-0.0218333	0.0428333	-0.0025	0.0188333	-0.0186667	-0.008	0.0538333	-0.00433333	-0.0115
																					2.52	1			2.51	-0.031	-0.0094919	-0.00590909	-0.04625	-0.0495833	-0.0235	-0.0235	-0.00666667	-0.00142857	-0.0105	-0.00483333	0.138333	-0.00316667	-0.00483333	0.0115	0.0761667	-0.0025	-0.0145	0.0146667	-0.008	-0.0128333	0.0623333	-0.0115
																					2.53	0			2.52	-0.031	-0.0094919	-0.00590909	-0.04625	-0.0495833	-0.0235	-0.0235	-0.00666667	-0.00142857	-0.0105	-0.00483333	0.0383333	-0.00316667	-0.00483333	0.0115	0.2095	-0.0025	-0.0145	-0.0186667	0.0253333	0.0205	0.029	-0.0115
																					2.54	1			2.53	-0.031	-0.0094919	0.085	-0.04625	-0.0495833	-0.0235	-0.0235	-0.00666667	-0.00142857	0.0145	-0.00483333	-0.0283333	-0.00316667	-0.00483333	-0.0218333	0.0428333	-0.0025	0.0188333	-0.0186667	-0.008	-0.0128333	0.029	0.0218333
																					2.55	0			2.54	-0.031	-0.0094919	-0.00590909	0.01625	-0.0495833	-0.0235	-0.0235	-0.00666667	-0.00142857	0.0145	-0.00483333	-0.0283333	-0.00316667	-0.00483333	-0.0218333	0.0761667	-0.0025	0.0521667	-0.0186667	-0.008	-0.0128333	-0.0376667	-0.0115
																					2.56	0			2.55	0.169	-0.0094919	-0.00590909	0.07875	-0.0495833	-0.0235	-0.0235	-0.00666667	-0.00142857	-0.0105	-0.00483333	0.0383333	-0.00316667	-0.00483333	-0.0218333	0.0428333	-0.0025	-0.0145	0.0146667	0.0253333	-0.0128333	-0.00433333	-0.0115
																					2.57	0			2.56	-0.031	-0.0094919	-0.00590909	-0.04625	-0.0495833	-0.0235	-0.0235	0.104444	-0.00142857	0.0145	-0.00483333	0.0383333	-0.00316667	0.0285	-0.0218333	0.0428333	-0.0025	0.0188333	-0.0186667	-0.008	0.0205	-0.0376667	0.0218333
																					2.58	0			2.57	-0.031	-0.0094919	0.085	0.01625	0.117083	-0.0235	-0.0235	-0.00666667	-0.00142857	0.0395	-0.00483333	-0.0283333	-0.00316667	-0.00483333	0.0115	0.0761667	-0.0025	-0.0145	-0.0186667	-0.008	0.0205	0.029	-0.0115
																					2.59	0			2.58	-0.031	-0.0094919	-0.00590909	0.01625	0.03375	-0.0235	-0.0235	-0.00666667	-0.00142857	-0.0105	-0.00483333	0.005	-0.00316667	-0.00483333	-0.0218333	0.0761667	0.0308333	-0.0145	0.0813333	-0.008	0.0205	0.0956667	-0.0115
																					2.6	0			2.59	0.169	-0.0094919	-0.00590909	0.01625	0.03375	-0.0235	-0.0235	-0.00666667	-0.00142857	-0.0105	-0.00483333	-0.0616667	-0.00316667	-0.00483333	0.0115	-0.0238333	-0.0025	0.0521667	-0.0186667	-0.008	-0.0128333	-0.0376667	-0.0115
																					2.61	0			2.6	-0.031	-0.0094919	0.085	-0.04625	-0.0495833	-0.0235	-0.0235	-0.00666667	-0.00142857	-0.0105	-0.00483333	0.0383333	-0.00316667	-0.00483333	-0.0218333	0.0095	-0.0025	-0.0145	-0.0186667	0.0253333	-0.0128333	0.0623333	-0.0115
																					2.62	3			2.61	-0.031	-0.0094919	-0.00590909	0.01625	-0.0495833	-0.0235	-0.0235	-0.00666667	-0.00142857	0.0145	-0.00483333	0.005	-0.00316667	0.0951667	-0.0218333	0.0761667	-0.0025	-0.0145	0.048	0.0253333	-0.0128333	-0.00433333	-0.0115
																					2.63	1			2.62	-0.031	-0.0094919	0.085	-0.04625	0.03375	-0.0235	-0.0235	-0.00666667	-0.00142857	0.0395	-0.00483333	-0.0283333	-0.00316667	0.0285	-0.0218333	-0.0238333	-0.0025	-0.0145	-0.0186667	-0.008	0.0205	-0.0376667	-0.0115
																					2.64	0			2.63	-0.031	-0.0094919	-0.00590909	-0.04625	-0.0495833	-0.0235	-0.0235	-0.00666667	-0.00142857	0.0145	-0.00483333	-0.0616667	-0.00316667	-0.00483333	0.0115	0.0095	0.0308333	-0.0145	-0.0186667	-0.008	-0.0128333	-0.00433333	-0.0115
																					2.65	1			2.64	-0.031	-0.0094919	-0.00590909	-0.04625	-0.0495833	-0.0235	-0.0235	-0.00666667	-0.00142857	-0.0105	-0.00483333	0.005	-0.00316667	-0.00483333	-0.0218333	0.0428333	-0.0025	0.0521667	-0.0186667	-0.008	-0.0128333	-0.0376667	0.0218333
																					2.66	0			2.65	-0.031	-0.0094919	-0.00590909	0.01625	-0.0495833	-0.0235	-0.0235	-0.00666667	-0.00142857	-0.0105	0.0285	-0.0283333	-0.00316667	-0.00483333	-0.0218333	-0.0238333	-0.0025	0.0188333	-0.0186667	-0.008	-0.0128333	0.029	-0.0115
																					2.67	1			2.66	-0.031	-0.0094919	-0.00590909	0.01625	0.03375	-0.0235	-0.0235	-0.00666667	-0.00142857	-0.0105	-0.00483333	0.0716667	-0.00316667	-0.00483333	-0.0218333	-0.0571667	-0.0025	0.0188333	-0.0186667	0.0253333	-0.0128333	-0.00433333	-0.0115
																					2.68	0			2.67	-0.031	-0.0094919	-0.00590909	0.01625	0.03375	-0.0235	-0.0235	-0.00666667	-0.00142857	0.0145	-0.00483333	0.005	-0.00316667	0.0285	0.0448333	-0.0238333	0.0308333	-0.0145	-0.0186667	-0.008	-0.0128333	-0.00433333	-0.0115
																					2.69	0			2.68	-0.031	-0.0094919	-0.00590909	0.01625	-0.0495833	-0.0235	-0.0235	-0.00666667	-0.00142857	-0.0105	-0.00483333	0.005	-0.00316667	-0.00483333	-0.0218333	0.0761667	-0.0025	-0.0145	0.0146667	-0.008	0.0205	0.029	-0.0115
																					2.7	0			2.69	0.169	-0.0094919	-0.00590909	-0.04625	-0.0495833	-0.0235	-0.0235	-0.00666667	-0.00142857	-0.0105	-0.00483333	0.005	-0.00316667	-0.00483333	-0.0218333	0.0428333	-0.0025	-0.0145	0.0146667	0.0253333	-0.0128333	0.029	0.0218333
																					2.71	2			2.7	-0.031	-0.0094919	-0.00590909	0.01625	-0.0495833	-0.0235	-0.0235	-0.00666667	-0.00142857	0.0145	-0.00483333	0.005	-0.00316667	0.0618333	-0.0218333	-0.0571667	-0.0025	-0.0145	-0.0186667	-0.008	0.0205	-0.00433333	-0.0115
																					2.72	1			2.71	-0.031	-0.0094919	-0.00590909	-0.04625	0.03375	-0.0235	-0.0235	-0.00666667	-0.00142857	-0.0105	-0.00483333	0.005	-0.00316667	-0.00483333	-0.0218333	-0.0238333	-0.0025	-0.0145	-0.0186667	-0.008	-0.0128333	-0.00433333	-0.0115
																					2.73	0			2.72	-0.031	-0.0094919	-0.00590909	0.01625	-0.0495833	-0.0235	-0.0235	0.104444	0.141429	-0.0105	-0.00483333	-0.0283333	-0.00316667	-0.00483333	0.0448333	-0.0238333	-0.0025	-0.0145	0.048	-0.008	0.0538333	-0.0376667	0.0218333
																					2.74	1			2.73	0.169	-0.0094919	-0.00590909	0.07875	-0.0495833	-0.0235	-0.0235	-0.00666667	0.141429	-0.0105	-0.00483333	-0.0283333	-0.00316667	-0.00483333	0.0448333	0.0095	-0.0025	-0.0145	-0.0186667	-0.008	0.0205	-0.0376667	-0.0115
																					2.75	1			2.74	-0.031	-0.0094919	-0.00590909	0.07875	-0.0495833	-0.0235	-0.0235	-0.00666667	-0.00142857	-0.0105	-0.00483333	-0.0283333	-0.00316667	-0.00483333	0.0115	-0.0238333	-0.0025	0.0188333	0.0146667	-0.008	0.0205	-0.00433333	-0.0115
																					2.76	1			2.75	-0.031	-0.0094919	0.085	-0.04625	-0.0495833	-0.0235	-0.0235	-0.00666667	-0.00142857	-0.0105	-0.00483333	0.0383333	-0.00316667	-0.00483333	-0.0218333	0.0095	-0.0025	0.0188333	-0.0186667	-0.008	0.0871667	0.029	-0.0115
																					2.77	0			2.76	-0.031	-0.0094919	-0.00590909	-0.04625	0.03375	-0.0235	-0.0235	-0.00666667	-0.00142857	-0.0105	0.0285	0.005	-0.00316667	-0.00483333	-0.0218333	0.0095	-0.0025	-0.0145	0.0146667	0.092	0.0205	0.0623333	-0.0115
																					2.78	1			2.77	-0.031	-0.0094919	-0.00590909	-0.04625	0.03375	-0.0235	-0.0235	-0.00666667	-0.00142857	-0.0105	-0.00483333	0.0383333	-0.00316667	-0.00483333	0.0448333	0.0095	-0.0025	-0.0145	-0.0186667	-0.008	-0.0128333	-0.00433333	0.0218333
																					2.79	0			2.78	-0.031	-0.0094919	-0.00590909	0.01625	-0.0495833	-0.0235	-0.0235	-0.00666667	-0.00142857	0.0145	-0.00483333	0.0716667	-0.00316667	-0.00483333	-0.0218333	0.0428333	-0.0025	-0.0145	0.0146667	-0.008	0.0205	-0.00433333	-0.0115
																					2.8	0			2.79	-0.031	-0.0094919	-0.00590909	-0.04625	-0.0495833	-0.0235	-0.0235	-0.00666667	-0.00142857	-0.0105	-0.00483333	-0.0283333	-0.00316667	-0.00483333	0.0115	0.176167	-0.0025	-0.0145	0.0146667	0.0253333	-0.0128333	-0.00433333	-0.0115
																					2.81	1			2.8	-0.031	-0.0094919	-0.00590909	-0.04625	-0.0495833	-0.0235	-0.0235	-0.00666667	-0.00142857	0.0395	-0.00483333	-0.0616667	-0.00316667	-0.00483333	-0.0218333	0.0761667	-0.0025	-0.0145	0.0146667	-0.008	-0.0128333	-0.00433333	-0.0115
																					2.82	0			2.81	-0.031	-0.0094919	-0.00590909	-0.04625	-0.0495833	-0.0235	-0.0235	-0.00666667	-0.00142857	0.0395	-0.00483333	-0.0616667	-0.00316667	-0.00483333	0.0115	0.0761667	-0.0025	-0.0145	0.0146667	-0.008	-0.0128333	-0.0376667	-0.0115
																					2.83	1			2.82	-0.031	-0.0094919	-0.00590909	0.01625	-0.0495833	-0.0235	-0.0235	-0.00666667	-0.00142857	-0.0105	-0.00483333	-0.0283333	-0.00316667	-0.00483333	-0.0218333	0.1095	-0.0025	-0.0145	0.0146667	0.0253333	-0.0128333	-0.0376667	-0.0115
																					2.84	0			2.83	-0.031	-0.0094919	-0.00590909	0.01625	0.03375	-0.0235	-0.0235	-0.00666667	-0.00142857	-0.0105	-0.00483333	0.0716667	-0.00316667	0.0285	-0.0218333	0.2095	-0.0025	-0.0145	-0.0186667	0.0586667	-0.0128333	-0.0376667	-0.0115
																					2.85	1			2.84	-0.031	-0.0094919	-0.00590909	0.01625	-0.0495833	0.0765	0.0765	-0.00666667	-0.00142857	-0.0105	-0.00483333	0.0383333	-0.00316667	-0.00483333	-0.0218333	0.2095	-0.0025	-0.0145	-0.0186667	-0.008	0.0538333	-0.0376667	-0.0115
																					2.86	0			2.85	-0.031	-0.0094919	-0.00590909	-0.04625	-0.0495833	-0.0235	-0.0235	-0.00666667	-0.00142857	0.0145	-0.00483333	-0.0283333	-0.00316667	-0.00483333	-0.0218333	0.0761667	-0.0025	-0.0145	-0.0186667	-0.008	0.0538333	0.029	-0.0115
																					2.87	0			2.86	-0.031	-0.0094919	-0.00590909	0.01625	0.03375	-0.0235	-0.0235	-0.00666667	-0.00142857	0.0145	-0.00483333	-0.0283333	0.0301667	-0.00483333	0.0115	0.0095	-0.0025	-0.0145	0.0146667	-0.008	0.0538333	-0.00433333	-0.0115
																					2.88	0			2.87	-0.031	-0.0094919	0.085	-0.04625	-0.0495833	-0.0235	-0.0235	-0.00666667	-0.00142857	-0.0105	-0.00483333	0.005	-0.00316667	-0.00483333	-0.0218333	0.0428333	-0.0025	-0.0145	-0.0186667	-0.008	0.0205	-0.00433333	-0.0115
																					2.89	1			2.88	-0.031	-0.0094919	-0.00590909	-0.04625	-0.0495833	-0.0235	-0.0235	-0.00666667	-0.00142857	0.0395	-0.00483333	0.0716667	-0.00316667	-0.00483333	0.0115	0.0095	0.0641667	-0.0145	-0.0186667	0.0253333	-0.0128333	-0.00433333	-0.0115
																					2.9	0			2.89	0.169	-0.0094919	-0.00590909	0.01625	0.117083	-0.0235	-0.0235	-0.00666667	-0.00142857	-0.0105	-0.00483333	-0.0283333	-0.00316667	-0.00483333	-0.0218333	0.0095	-0.0025	0.0188333	-0.0186667	-0.008	0.0205	-0.0376667	-0.0115
																					2.91	0			2.9	-0.031	-0.0094919	-0.00590909	0.01625	0.03375	-0.0235	-0.0235	-0.00666667	-0.00142857	-0.0105	-0.00483333	-0.0283333	-0.00316667	-0.00483333	0.0115	0.0095	-0.0025	0.0521667	-0.0186667	-0.008	0.0205	-0.0376667	-0.0115
																					2.92	0			2.91	-0.031	-0.0094919	-0.00590909	-0.04625	-0.0495833	-0.0235	-0.0235	-0.00666667	-0.00142857	0.0145	-0.00483333	0.105	-0.00316667	-0.00483333	0.0448333	0.0428333	-0.0025	-0.0145	-0.0186667	0.0586667	-0.0128333	-0.00433333	-0.0115
																					2.93	1			2.92	-0.031	-0.0094919	-0.00590909	-0.04625	-0.0495833	-0.0235	-0.0235	-0.00666667	-0.00142857	-0.0105	-0.00483333	-0.0616667	-0.00316667	-0.00483333	0.0115	0.0428333	-0.0025	-0.0145	0.048	-0.008	-0.0128333	0.0623333	-0.0115
																					2.94	1			2.93	0.169	-0.0094919	-0.00590909	-0.04625	-0.0495833	-0.0235	-0.0235	-0.00666667	-0.00142857	0.0145	0.0285	0.005	0.0301667	-0.00483333	0.0115	0.1095	-0.0025	-0.0145	-0.0186667	-0.008	0.0871667	0.0623333	-0.0115
																					2.95	0			2.94	-0.031	-0.0094919	-0.00590909	0.01625	-0.0495833	-0.0235	-0.0235	-0.00666667	-0.00142857	-0.0105	-0.00483333	0.0383333	-0.00316667	-0.00483333	0.0115	0.0095	-0.0025	-0.0145	-0.0186667	-0.008	-0.0128333	-0.0376667	-0.0115
																					2.96	0			2.95	-0.031	-0.0094919	-0.00590909	-0.04625	0.03375	-0.0235	-0.0235	-0.00666667	-0.00142857	0.0145	-0.00483333	-0.0616667	-0.00316667	-0.00483333	-0.0218333	-0.0571667	0.0308333	-0.0145	-0.0186667	0.0253333	0.0205	-0.00433333	0.0218333
																					2.97	0			2.96	-0.031	-0.0094919	-0.00590909	-0.04625	-0.0495833	-0.0235	-0.0235	0.104444	-0.00142857	-0.0105	-0.00483333	-0.0283333	-0.00316667	-0.00483333	0.0448333	0.0095	-0.0025	-0.0145	-0.0186667	-0.008	0.0205	-0.00433333	-0.0115
																					2.98	0			2.97	-0.031	-0.0094919	-0.00590909	0.01625	0.03375	-0.0235	-0.0235	-0.00666667	-0.00142857	-0.0105	-0.00483333	0.0716667	-0.00316667	0.0618333	-0.0218333	0.0095	0.0308333	0.0188333	0.048	0.0253333	-0.0128333	0.029	0.0218333
																					2.99	0			2.98	0.169	-0.0094919	0.085	-0.04625	-0.0495833	-0.0235	-0.0235	-0.00666667	-0.00142857	0.0145	-0.00483333	-0.0616667	-0.00316667	-0.00483333	-0.0218333	0.0095	0.0308333	-0.0145	-0.0186667	0.0253333	-0.0128333	-0.0376667	0.0218333
																									2.99	-0.031	-0.0094919	-0.00590909	0.01625	-0.0495833	-0.0235	-0.0235	-0.00666667	-0.00142857	-0.0105	-0.00483333	-0.0283333	-0.00316667	-0.00483333	-0.0218333	0.0095	-0.0025	-0.0145	-0.0186667	-0.008	-0.0128333	-0.0376667	-0.0115
60
[truncated: 7 more columns]
