# Supplementary material for: Aversive stimuli drive hypothalamus-to-habenula excitation to promote escape behavior
Source: eLife. 2017 Sep 5;6:e30697. doi: 10.7554/eLife.30697 (PMC5606847; doi:10.7554/eLife.30697)
Supplement: Figure 1—supplement figure 1—source data 1. [file elife-30697-fig1.xlsx]

## Sheet: Figure1-figure supplement1
Panel B																					Panel C
Air-puff: photometry
Photometry, DeltaF/F - Example trace mouse 1									Photometry, DeltaF/F - timecourse graph shock responses
	Trial	1	2	3	4	5															Photometry, shuttle box, DeltaF/F - Example trace mouse POG													Averaged speed, shuttle box - POG													Photometry, rotarod, mouse POG
time, s													air-puff								Trial	1	2	3	4	5	6	7	8	9	10		Trial	1	2	3	4	5	6	7	8	9	10			time	Trial	1	2
0		0.0170976	0.00346659	-0.0164215	-0.00777186	0.00584071				bin, s	-10	-5	0	5	10	15	20	25			0	582.941	571.941	613.505	575.632	549.128	590.471	601.767	585.599	605.311	572.974		time													0.01		589.426	596.296
0.5		0.0211619	-0.00811525	-0.0102324	-0.0126181	-0.00863446			mouse												0.5	583.089	579.545	616.458	585.451	557.101	585.672	612.103	587.149	586.78	564.853		1	0	0.119	0	0	0	0	0	0	0	0			0.02
1		0.00861769	-0.0211758	-0.00267876	-0.00115987	-0.00243943			1		0.000383457	0.00228553	0.109451	0.102766	0.0798862	0.0815879	0.0811851	0.078062			1	591.652	577.625	618.6	589.954	557.397	576.813	597.411	580.283	570.39	568.545		2	0	0	0.033	0	0	0	0	0	0	0			0.03
1.5		0.00365607	-0.00847002	0.00210771	-0.0110545	-0.001076			2		0.0165466	0.0121026	0.0864152	0.0382557	-0.0191971	-0.00658415	-0.0487182	-0.0581838			1.5	584.787	573.639	620.962	578.733	552.893	582.35	605.089	580.431	570.464	570.095		3	0.039	0	0	0	0	0	0	0	0	0			0.04
2		-0.00944867	-0.0121631	-0.0248344	-0.0118839	-0.00147134			3		0.00636978	-0.00432167	0.129368	0.0133779	0.00419246	0.00161476	0.00800508	0.000307145			2	587.887	571.276	623.177	585.303	542.926	578.88	596.746	575.041	566.699	574.82		4	0	0.082	0	0	0	0	0.02	0	0.071	0			0.05
2.5		-0.012931	-0.0121029	-0.0192479	-0.0123616	0.00438167			4		-0.00366639	0.00654104	0.160047	0.0317762	0.0229093	0.0274128	0.0220683	0.0115913			2.5	572.088	581.538	643.848	565.001	538.202	576.813	594.606	586.558	557.47	573.934		5	0	0	0	0	0	0	0.065	0	0.007	0			0.06
3		-0.0122632	0.0211191	-0.0184854	-0.0008683	-0.00485903															3	574.894	594.089	612.546	562.491	541.007	567.511	586.632	583.827	568.028	572.014		6	0	0	0	0	0	0	0	0	0.041	0			0.07
3.5		-0.00924155	0.00035151	-0.0179161	0.0345329	0.011382															3.5	571.941	584.565	609.002	577.478	537.759	569.504	568.618	585.82	557.323	566.108		7	0	0	0	0	0	0	0	0	0	0			0.08
4		-0.0234062	-0.00451643	0.0190373	-0.00743195	0.00638031															4	582.276	572.015	604.425	577.33	535.396	580.431	583.162	586.928	564.632	566.182		8	0	0	0	0	0	0	0	0	0	0			0.09
4.5		0.00234099	0.00166264	0.00735333	-0.0168888	-0.00963986															4.5	569.652	568.175	599.774	580.505	541.45	569.061	578.216	577.478	560.35	565.961		9	0	0	0	0	0	0	0	0	0	0			0.1
5		0.0119772	0.00087986	0.00513851	-0.00067632	-0.0149976															5	566.699	567.806	593.572	571.793	555.256	571.645	581.39	590.84	557.47	566.034		10	0	0	0	0	0	0	0	0	0	0			0.11
5.5		0.014424	0.0284741	0.0131289	-0.00730252	0.00089264															5.5	593.793	575.337	588.626	572.088	548.464	574.155	572.162	583.31	551.712	572.236		11	0	0.037	0	0	0	0	0	0	0	0			0.12
6		-0.00664669	0.0143981	-0.00735129	-0.00221748	-0.00451702															6	603.022	573.491	585.156	569.8	545.289	568.84	567.954	580.209	552.598	568.102		12	0	0.212	0.188	0	0.066	0	0.175	0.194	0	0.037			0.13
6.5		-0.00407106	-0.0060383	0.0334735	-0.00271619	-0.00146918															6.5	609.593	568.249	600.733	576.444	534.067	580.283	576.887	589.733	562.122	570.169		13	0.231	0.042	0.064	0.099	0	0.1	0.039	0	0.135	0.182			0.14
7		-0.0076497	-0.00068201	0.0178802	0.013831	0.00419541															7	607.894	579.914	590.176	568.175	543.148	569.43	576.223	596.747	559.242	570.095		14	0	0.166	0.211	0.085	0.267	0.099	0.065	0.033	0.1	0			0.15
7.5		0.0166267	0.0138726	0.00435033	0.0367375	0.00689822															7.5	601.545	575.337	594.532	579.102	546.101	576.296	570.759	597.411	556.806	569.061		15	0.131	0.056	0	0	0	0	0	0	0	0.082			0.16
8		0.0181507	0.006009	0.00103156	0.0231393	0.00475741															8	591.283	567.806	612.472	572.31	542.41	574.082	571.128	604.572	564.41	616.68		16	0	0.123	0	0	0	0	0	0	0	0			0.17
8.5		0.0120282	-0.00508287	0.0194589	0.0387051	0.00139252															8.5	598.74	580.578	622.143	575.558	551.86	583.458	567.806	597.485	572.31	620.667		17	0	0.112	0	0	0	0	0.033	0	0	0			0.18
9		-0.00571855	-0.0165868	0.0220624	0.00724253	0.00510739															9	587.887	581.76	616.311	581.833	545.953	594.975	562.86	591.062	567.954	609.962		18	0.099	0	0	0	0	0	0	0	0	0			0.19
9.5		-0.00157861	-0.00308919	-0.00255038	0.021323	0.0104072															9.5	591.948	578.659	639.862	585.599	544.182	579.176	563.081	577.478	556.363	613.21		19	0.045	0	0	0	0	0	0	0	0	0			0.2
10		-0.0168526	0.00424399	-0.0107504	0.0939116	0.00739134															10	620.593	580.209	618.452	575.337	536.134	573.122	560.94	587.961	550.974	601.471		20	0	0	0	0	0	0	0	0	0.033	0			0.21
10.5		0.0491361	0.0227713	0.0242051	0.130314	0.0274592															10.5	690.138	611.069	623.841	653.003	585.82	576.223	566.846	591.431	545.732	588.699		21	0	0	0	0	0	0	0	0	0	0			0.22
11		0.218808	0.0837948	0.125832	0.104774	0.0807415															11	680.91	625.096	616.163	655.292	627.828	582.793	561.457	585.156	551.417	603.908		22	0.098	0.075	0	0	0	0	0	0	0	0			0.23
11.5		0.17283	0.131742	0.108363	0.102396	0.0483046															11.5	654.184	680.098	624.284	657.58	614.834	603.686	583.236	578.807	541.45	607.673		23	0	0	0	0	0.036	0	0	0	0.033	0			0.24
12		0.114472	0.111713	0.0972277	0.0598913	0.019397															12	624.432	667.473	653.372	675.299	625.096	665.923	643.553	619.707	604.277	589.438		24	0	0	0	0	0	0	0	0	0	0			0.25
12.5		0.100861	0.0778582	0.108354	0.017647	0.0138898															12.5	647.909	710.81	673.379	664.446	619.928	657.506	670.943	657.433	660.017	586.632		25	0	0	0	0	0.033	0	0	0	0.033	0			0.26
13		0.103732	0.0590344	0.0881683	0.00326281	-0.0133013															13	659.131	683.125	687.554	647.097	666.513	640.969	666.366	704.461	664.446	634.177		26	0	0	0	0	0.033	0	0	0	0	0			0.27
13.5		0.10171	0.0584677	0.0776956	0.00163574	0.00654545															13.5	652.043	669.54	673.527	621.036	650.493	637.278	628.049	684.97	666.366	671.977		27	0	0	0.033	0	0	0	0	0	0	0			0.28
14		0.0356534	0.0507952	0.0613549	-0.0082937	0.0149383															14	629.969	669.983	642.077	634.768	626.278	653.741	620.667	648.647	640.822	649.755		28	0	0	0	0	0	0	0	0	0	0			0.29
14.5		0.0549499	0.0447659	0.0335428	-0.00540331	0.00235179															14.5	618.157	651.526	655.366	610.183	603.317	683.346	623.841	653.298	615.72	634.029		29	0	0	0	0	0	0	0	0	0	0			0.3
15		0.0840285	0.0544032	0.035569	-0.00861903	0.0167352															15	599.183	623.177	667.03	657.507	599.109	647.318	629.009	632.774	621.995	631.224		30	0	0	0	0	0	0	0	0	0	0			0.31
15.5		0.0373295	0.0627001	0.025702	0.014169	0.0350923															15.5	586.706	613.653	648.795	675.668	621.405	627.385	621.626	658.983	612.62	610.921		31	0	0	0	0	0	0	0	0	0	0			0.32
16		0.0838601	0.0534692	0.0199545	0.00331517	0.0255074															16	583.679	617.271	630.633	658.983	603.76	627.975	611.881	650.567	600.438	609.814															0.33
16.5		0.111938	0.0412209	0.0162273	-0.00740831	0.0145606															16.5	590.545	622.365	610.331	628.123	600.807	623.546	605.089	624.949	586.411	612.029															0.34
17		0.0700449	0.0260859	0.0129953	-0.0140914	0.0408031															17	584.639	604.055	612.25	612.324	625.096	621.257	599.7	610.405	579.249	591.8															0.35
17.5		0.0592656	0.0325708	0.0428729	0.0289823	0.0276984															17.5	587.813	611.364	607.009	603.686	632.184	612.915	603.096	610.405	586.042	578.807															0.36
18		0.0421043	0.0366853	0.032486	0.0468113	0.00697626															18	583.236	616.015	602.874	581.021	655.365	606.049	594.901	614.317	602.727	579.25															0.37
18.5		0.0632559	0.0254157	0.0350191	0.0344729	0.0141701															18.5	580.357	644.956	596.747	591.874	631.815	591.505	597.337	605.753	594.163	593.941															0.38
19		0.0698805	0.0214027	0.0113889	-0.00431937	0.00256548															19	579.914	633.07	588.183	598.518	606.639	586.337	618.157	593.794	605.606	594.827															0.39
19.5		0.0646047	0.0445129	0.00856736	-0.00595258	-0.00821929															19.5	583.458	626.351	591.21	622.143	604.868	590.84	604.572	587.74	598.74	579.25															0.4
20		0.0500249	0.0379515	0.0146693	-0.00624069	-0.0084928															20	585.672	605.458	595.787	643.184	592.981	572.974	637.647	606.196	601.102	594.384															0.41
20.5		0.0654586	0.0327193	0.0755928	-0.00714852	-0.0104823															20.5	571.941	604.055	594.827	600.216	609.445	568.323	611.586	574.008	604.351	608.633															0.42
21		0.0460087	0.0246288	0.0676646	-0.0116884	-0.00321945															21	574.598	616.606	593.129	598.888	600.807	575.189	583.605	582.424	609.445	587.444															0.43
21.5		0.0595273	0.0324094	0.0453887	-0.0232915	0.012614															21.5	586.263	615.425	592.317	574.008	594.458	585.894	577.625	575.632	604.646	574.967															0.44
22		0.0508976	0.0408099	0.0590542	-0.0128711	0.0246257															22	586.78	620.888	592.465	575.263	596.894	569.874	573.122	565.665	609.445	562.195															0.45
22.5		0.0189397	0.0258554	0.0497248	-0.0108407	0.0396846															22.5	582.498	609.445	597.485	564.189	590.397	563.82	578.733	565.887	616.754	554															0.46
23		0.0492745	0.020037	0.0207818	-0.0122261	0.0205221															23	597.928	602.579	593.055	565.148	594.236	575.189	586.928	597.559	602.948	553.853															0.47
23.5		0.038776	0.00842342	0.0244218	-0.0258101	0.0185371															23.5	582.572	602.284	590.471	558.061	601.398	577.625	591.948	586.042	601.914	563.893															0.48
24		0.0327243	0.0132692	0.0463853	-0.0232496	0.0300649															24	595.122	596.82	599.257	576.666	611.734	578.29	575.558	578.954	602.874	566.108															0.49
24.5		0.0292854	0.0377823	0.026908	-0.0198789	0.0294621															24.5	589.438	613.21	591.726	596.156	615.499	583.605	576.887	587.961	596.156	568.101															0.5		583.198	602.56
25		0.026429	0.051894	0.0217658	-0.0114124	0.0331526															25	594.31	607.082	594.236	580.135	610.995	597.633	579.397	566.035	576.075	574.082															0.51
25.5		0.0502013	0.0269101	0.0538147	-0.0315329	0.0365865															25.5	600.438	609.962	574.229	571.941	611.586	601.619	564.558	570.686	589.068	556.806															0.52
26		0.0676823	0.0137948	0.0326556	-0.00767574	0.0293482															26	612.103	602.8	578.29	578.216	603.834	637.352	568.914	561.383	594.31	570.021															0.53
26.5		0.048724	0.0391368	0.041036	-0.0152919	0.00043141															26.5	600.364	599.33	584.27	596.673	598.076	616.458	575.189	559.611	599.626	569.43															0.54
27		0.0525575	0.038542	0.0494512	0.0166814	0.0007683															27	586.78	603.169	579.102	622.291	601.398	621.922	594.31	565.961	649.09	558.873															0.55
27.5		0.0646053	0.0240999	0.0139435	0.0326424	0.00273422															27.5	587.223	612.841	592.981	623.767	598.888	629.009	602.062	560.719	639.197	558.799															0.56
28		0.06242	0.00730484	0.0126317	0.0277939	-0.0132523															28	589.512	605.753	589.733	589.438	602.948	629.6	604.572	555.551	614.17	566.108															0.57
28.5		0.0840805	0.0199449	0.0211521	0.0283147	0.00262047															28.5	609.666	593.646	592.538	581.612	587.592	657.654	613.358	555.92	592.243	556.88															0.58
29		0.0654293	0.0416769	0.0273288	0.060336	-0.0127863															29	609.519	585.746	593.793	560.793	590.25	645.325	608.633	560.276	584.86	562.712															0.59
29.5		0.0582969	0.030949	0.0254018	0.0357499	-0.0184308															29.5	621.331	584.048	589.364	568.323	587.961	626.204	594.753	556.88	591.8	560.35															0.6
30	air-puff	0.0749027	0.0126984	0.0170983	0.0360829	-0.0215919															30	623.841	612.767	548.168	546.322	585.082	629.379	544.477	551.86	586.928	537.094															0.61
30.5	air-puff	0.0512876	-0.0018764	0.0317253	0.0243623	-0.0171888																																								0.62
31	air-puff	0.0374012	0.0299953	0.00557261	0.0113208	0.0394344																																								0.63
31.5	air-puff	0.0594582	0.0526013	0.0007163	-0.00078486	0.0373838																																								0.64
32	air-puff	0.0853727	0.0529648	0.0172443	0.0166896	0.0213176																																								0.65
32.5		0.0818317	0.0274684	0.00367616	0.0239805	-0.00566158																																								0.66
33		0.0465641	0.016221	0.0322123	-0.00120897	0.00111812																																								0.67
33.5		0.039051	0.0317361	0.0156015	-0.0196185	0.0127331																																								0.68
34		0.0623454	0.0246267	0.0289037	-0.0221385	-0.015378																																								0.69
34.5		0.0325198	0.00192077	0.0236766	-0.00850605	-0.00444893																																								0.7
35		0.0507514	0.0346592	0.0313194	0.0143975	0.0187662																																								0.71
35.5		0.0515907	0.0463253	0.0543063	0.0320549	-0.010414																																								0.72
36		0.060978	0.0350728	0.0343008	0.0207395	-0.0171104																																								0.73
36.5		0.0459693	0.0343504	0.00891	-0.0124934	-0.0169355																																								0.74
37		0.0354012	0.0229772	0.0195484	-0.0215688	-0.0190303																																								0.75
37.5		0.020502	0.0123736	0.00456102	-0.0198916	-0.0265292																																								0.76
38		0.0184532	0.00578587	0.00171821	-0.00484227	-0.0372979																																								0.77
38.5		0.0520324	-0.0100197	-0.00030634	-0.00713839	-0.0270194																																								0.78
39		0.0410076	-0.00048414	0.02899	-0.0125233	-0.0241755																																								0.79
39.5		0.0283025	0.00956483	0.0282845	-0.0172349	-0.0394131																																								0.8
40		0.0156727	-0.0104249	0.031762	-0.0166824	-0.0227878																																								0.81
40.5		0.0207374	0.0149793	0.0373468	-0.0185301	0.0102602																																								0.82
41		-0.00040352	0.035562	0.0142994	-0.0410128	0.00397968																																								0.83
41.5		0.0538707	0.0440127	-0.00871391	-0.00894175	0.0220015																																								0.84
42		0.0353153	0.0383031	-0.00280943	-0.0110592	-0.00046883																																								0.85
42.5		0.00919302	0.034145	0.0303057	-0.00505945	0.0226875																																								0.86
43		0.0496984	0.0333434	0.00876056	0.0232667	-0.0119481																																								0.87
43.5		0.0443627	0.03445	0.00101172	0.026916	-0.019017																																								0.88
44		0.0253204	0.0269383	-0.00282187	0.0265789	-0.0329368																																								0.89
44.5		0.0321631	0.0257669	-0.00568346	-0.00751866	-0.034717																																								0.9
45		0.0425694	0.019479	0.0209189	-0.0203071	-0.0234372																																								0.91
45.5		0.0400197	0.0633417	0.0179819	-0.0168194	-0.0277008																																								0.92
46		0.0334545	0.0320895	-0.00287948	0.00614725	-0.0188198																																								0.93
46.5		0.0313229	0.0405604	-0.00363102	-0.0054075	-0.0147176																																								0.94
47		0.0235731	0.0216207	-0.0116708	-0.0255816	-0.00944543																																								0.95
47.5		0.049836	0.00148204	-0.0212905	-0.0169595	-0.0348877																																								0.96
48		0.041639	0.0132284	-0.00810452	-0.0271223	-0.0300182																																								0.97
48.5		0.0327798	-0.00519916	0.0171954	-0.0315357	-0.0249254																																								0.98
49		0.0202121	-0.00833434	0.0312515	0.0209316	-0.0126392																																								0.99
49.5		0.0251177	-0.00574029	0.0382162	0.028417	-0.0445619																																								1		577.146	606.304
50		0.0188331	-0.0047977	0.0334057	0.0175738	-0.0379705																																								1.01
50.5		0.0435047	-0.00217782	0.0391754	-0.00595922	-0.024581																																								1.02
51		0.0486341	0.0382933	0.0267439	-0.00365385	-0.0236038																																								1.03
51.5		0.0557677	0.0400603	0.0268165	-0.00164369	-0.00168815																																								1.04
52		0.0567551	0.0330316	0.0308225	-0.0162867	0.0306217																																								1.05
52.5		0.0305563	0.0263573	0.0551826	-0.0137277	0.00099608																																								1.06
53		0.0520309	0.0367142	0.0594234	-0.00680409	-0.0262358																																								1.07
53.5		0.0668833	0.0279921	0.0297503	-0.0175112	-0.0408311																																								1.08
54		0.0476002	0.00210189	0.012754	-0.0233201	-0.0214576																																								1.09
54.5		0.0213862	0.0039098	0.0188997	-0.0230264	-0.0237056																																								1.1
55		0.0608617	0.00252282	0.0167013	-0.00889452	-0.0333324																																								1.11
55.5		0.0523347	-0.00415928	0.002452	-0.0101467	-0.0446012																																								1.12
56		0.0270077	-0.00888287	-0.00764059	-0.0126986	-0.0375336																																								1.13
56.5		0.0253381	0.0154589	-0.00889836	-0.0229356	-0.0323125																																								1.14
57		0.0566575	0.0197637	0.0276457	0.02384	-0.0324786																																								1.15
57.5		0.0551486	0.0474654	0.0370462	0.034127	-0.0235607																																								1.16
58		0.0139173	0.020699	0.0304978	0.0341994	-0.0274982																																								1.17
58.5		0.0344585	0.0277475	0.0125052	0.027997	-0.0232662																																								1.18
59		-0.00850702	0.00301452	-0.0032259	0.0101119	-0.0420134																																								1.19
59.5		-0.00386903	-0.00459435	-0.00460587	0.00471816	-0.0441786																																								1.2
																																														1.21
																																														1.22
																																														1.23
																																														1.24
																																														1.25
																																														1.26
																																														1.27
																																														1.28
																																														1.29
																																														1.3
																																														1.31
																																														1.32
																																														1.33
																																														1.34
																																														1.35
																																														1.36
																																														1.37
																																														1.38
																																														1.39
																																														1.4
																																														1.41
																																														1.42
																																														1.43
																																														1.44
																																														1.45
																																														1.46
																																														1.47
																																														1.48
																																														1.49
																																														1.5		588.144	611.194
																																														1.51
																																														1.52
																																														1.53
																																														1.54
																																														1.55
																																														1.56
																																														1.57
																																														1.58
																																														1.59
																																														1.6
																																														1.61
																																														1.62
																																														1.63
																																														1.64
																																														1.65
																																														1.66
																																														1.67
																																														1.68
																																														1.69
																																														1.7
																																														1.71
																																														1.72
																																														1.73
																																														1.74
																																														1.75
																																														1.76
																																														1.77
																																														1.78
																																														1.79
																																														1.8
																																														1.81
																																														1.82
																																														1.83
																																														1.84
																																														1.85
																																														1.86
																																														1.87
																																														1.88
																																														1.89
																																														1.9
																																														1.91
																																														1.92
																																														1.93
																																														1.94
																																														1.95
																																														1.96
																																														1.97
																																														1.98
																																														1.99
																																														2		597.67	622.412
																																														2.01
																																														2.02
																																														2.03
																																														2.04
																																														2.05
																																														2.06
																																														2.07
																																														2.08
																																														2.09
																																														2.1
																																														2.11
																																														2.12
																																														2.13
																																														2.14
																																														2.15
																																														2.16
																																														2.17
																																														2.18
																																														2.19
																																														2.2
																																														2.21
																																														2.22
																																														2.23
																																														2.24
																																														2.25
																																														2.26
																																														2.27
																																														2.28
																																														2.29
																																														2.3
																																														2.31
																																														2.32
																																														2.33
																																														2.34
																																														2.35
																																														2.36
																																														2.37
																																														2.38
																																														2.39
																																														2.4
																																														2.41
																																														2.42
																																														2.43
																																														2.44
																																														2.45
																																														2.46
																																														2.47
																																														2.48
																																														2.49
																																														2.5		589.926	623.744
																																														2.51
																																														2.52
																																														2.53
																																														2.54
																																														2.55
																																														2.56
																																														2.57
																																														2.58
																																														2.59
																																														2.6
																																														2.61
																																														2.62
																																														2.63
																																														2.64
																																														2.65
																																														2.66
																																														2.67
																																														2.68
																																														2.69
																																														2.7
																																														2.71
																																														2.72
																																														2.73
																																														2.74
																																														2.75
																																														2.76
																																														2.77
																																														2.78
																																														2.79
																																														2.8
																																														2.81
																																														2.82
																																														2.83
																																														2.84
																																														2.85
																																														2.86
																																														2.87
																																														2.88
																																														2.89
																																														2.9
																																														2.91
																																														2.92
																																														2.93
																																														2.94
																																														2.95
																																														2.96
																																														2.97
																																														2.98
																																														2.99
																																														3		591.55	607.976
																																														3.01
																																														3.02
																																														3.03
																																														3.04
																																														3.05
																																														3.06
																																														3.07
																																														3.08
																																														3.09
																																														3.1
																																														3.11
																																														3.12
																																														3.13
																																														3.14
																																														3.15
																																														3.16
																																														3.17
																																														3.18
																																														3.19
																																														3.2
																																														3.21
																																														3.22
																																														3.23
																																														3.24
																																														3.25
																																														3.26
																																														3.27
																																														3.28
																																														3.29
																																														3.3
																																														3.31
																																														3.32
																																														3.33
																																														3.34
																																														3.35
																																														3.36
																																														3.37
																																														3.38
																																														3.39
																																														3.4
																																														3.41
																																														3.42
																																														3.43
																																														3.44
																																														3.45
																																														3.46
																																														3.47
																																														3.48
																																														3.49
																																														3.5		580.588	583.014
																																														3.51
																																														3.52
																																														3.53
																																														3.54
																																														3.55
																																														3.56
																																														3.57
																																														3.58
																																														3.59
																																														3.6
																																														3.61
																																														3.62
																																														3.63
																																														3.64
																																														3.65
																																														3.66
																																														3.67
																																														3.68
																																														3.69
																																														3.7
																																														3.71
																																														3.72
																																														3.73
																																														3.74
																																														3.75
																																														3.76
																																														3.77
																																														3.78
																																														3.79
																																														3.8
																																														3.81
																																														3.82
																																														3.83
																																														3.84
																																														3.85
																																														3.86
																																														3.87
																																														3.88
																																														3.89
																																														3.9
																																														3.91
																																														3.92
																																														3.93
																																														3.94
																																														3.95
																																														3.96
																																														3.97
																																														3.98
																																														3.99
																																														4		574.696	601.41
																																														4.01
																																														4.02
																																														4.03
																																														4.04
																																														4.05
																																														4.06
																																														4.07
																																														4.08
																																														4.09
																																														4.1
																																														4.11
																																														4.12
																																														4.13
																																														4.14
																																														4.15
																																														4.16
																																														4.17
																																														4.18
																																														4.19
																																														4.2
																																														4.21
																																														4.22
																																														4.23
																																														4.24
																																														4.25
																																														4.26
																																														4.27
																																														4.28
																																														4.29
																																														4.3
																																														4.31
																																														4.32
																																														4.33
																																														4.34
																																														4.35
																																														4.36
																																														4.37
																																														4.38
																																														4.39
																																														4.4
																																														4.41
																																														4.42
																																														4.43
																																														4.44
																																														4.45
																																														4.46
																																														4.47
																																														4.48
																																														4.49
																																														4.5		570.552	593.808
																																														4.51
																																														4.52
																																														4.53
																																														4.54
																																														4.55
																																														4.56
																																														4.57
																																														4.58
																																														4.59
																																														4.6
																																														4.61
																																														4.62
																																														4.63
																																														4.64
																																														4.65
																																														4.66
																																														4.67
																																														4.68
																																														4.69
																																														4.7
																																														4.71
																																														4.72
																																														4.73
																																														4.74
																																														4.75
																																														4.76
																																														4.77
																																														4.78
																																														4.79
																																														4.8
																																														4.81
																																														4.82
																																														4.83
																																														4.84
																																														4.85
																																														4.86
																																														4.87
																																														4.88
																																														4.89
																																														4.9
																																														4.91
																																														4.92
																																														4.93
																																														4.94
																																														4.95
																																														4.96
																																														4.97
																																														4.98
																																														4.99
																																														5		601.908	598.554
																																														5.01
																																														5.02
																																														5.03
																																														5.04
																																														5.05
																																														5.06
																																														5.07
																																														5.08
																																														5.09
																																														5.1
																																														5.11
																																														5.12
																																														5.13
																																														5.14
																																														5.15
																																														5.16
																																														5.17
																																														5.18
																																														5.19
																																														5.2
																																														5.21
																																														5.22
																																														5.23
																																														5.24
																																														5.25
																																														5.26
																																														5.27
																																														5.28
																																														5.29
																																														5.3
																																														5.31
																																														5.32
																																														5.33
																																														5.34
																																														5.35
																																														5.36
																																														5.37
																																														5.38
																																														5.39
																																														5.4
																																														5.41
																																														5.42
																																														5.43
																																														5.44
																																														5.45
																																														5.46
																																														5.47
																																														5.48
																																														5.49
																																														5.5		608.874	597.388
																																														5.51
																																														5.52
																																														5.53
																																														5.54
																																														5.55
																																														5.56
																																														5.57
																																														5.58
																																														5.59
																																														5.6
																																														5.61
																																														5.62
																																														5.63
																																														5.64
																																														5.65
																																														5.66
																																														5.67
																																														5.68
																																														5.69
																																														5.7
																																														5.71
																																														5.72
																																														5.73
																																														5.74
																																														5.75
																																														5.76
																																														5.77
																																														5.78
																																														5.79
																																														5.8
																																														5.81
																																														5.82
																																														5.83
																																														5.84
																																														5.85
																																														5.86
																																														5.87
																																														5.88
																																														5.89
																																														5.9
																																														5.91
																																														5.92
																																														5.93
																																														5.94
																																														5.95
																																														5.96
																																														5.97
																																														5.98
																																														5.99
																																														6		585.226	602.14
																																														6.01
																																														6.02
																																														6.03
																																														6.04
																																														6.05
																																														6.06
																																														6.07
																																														6.08
																																														6.09
																																														6.1
																																														6.11
																																														6.12
																																														6.13
																																														6.14
																																														6.15
																																														6.16
																																														6.17
																																														6.18
																																														6.19
																																														6.2
																																														6.21
																																														6.22
																																														6.23
																																														6.24
																																														6.25
																																														6.26
																																														6.27
																																														6.28
																																														6.29
																																														6.3
																																														6.31
																																														6.32
																																														6.33
																																														6.34
																																														6.35
																																														6.36
																																														6.37
																																														6.38
																																														6.39
																																														6.4
																																														6.41
																																														6.42
																																														6.43
																																														6.44
																																														6.45
																																														6.46
																																														6.47
																																														6.48
																																														6.49
																																														6.5		607.846	614.468
																																														6.51
																																														6.52
																																														6.53
																																														6.54
																																														6.55
																																														6.56
																																														6.57
																																														6.58
																																														6.59
																																														6.6
																																														6.61
																																														6.62
																																														6.63
																																														6.64
																																														6.65
																																														6.66
																																														6.67
																																														6.68
																																														6.69
																																														6.7
																																														6.71
																																														6.72
																																														6.73
																																														6.74
																																														6.75
																																														6.76
																																														6.77
																																														6.78
																																														6.79
																																														6.8
																																														6.81
																																														6.82
																																														6.83
																																														6.84
																																														6.85
																																														6.86
																																														6.87
																																														6.88
																																														6.89
																																														6.9
																																														6.91
																																														6.92
																																														6.93
																																														6.94
																																														6.95
																																														6.96
																																														6.97
																																														6.98
																																														6.99
																																														7		623.77	627.752
																																														7.01
																																														7.02
																																														7.03
																																														7.04
																																														7.05
																																														7.06
																																														7.07
																																														7.08
																																														7.09
																																														7.1
																																														7.11
																																														7.12
																																														7.13
																																														7.14
																																														7.15
																																														7.16
																																														7.17
																																														7.18
																																														7.19
																																														7.2
																																														7.21
																																														7.22
																																														7.23
																																														7.24
																																														7.25
																																														7.26
																																														7.27
																																														7.28
																																														7.29
																																														7.3
																																														7.31
																																														7.32
																																														7.33
																																														7.34
																																														7.35
																																														7.36
																																														7.37
																																														7.38
																																														7.39
																																														7.4
																																														7.41
																																														7.42
																																														7.43
																																														7.44
																																														7.45
																																														7.46
																																														7.47
																																														7.48
																																														7.49
																																														7.5		609.002	601.84
																																														7.51
																																														7.52
																																														7.53
																																														7.54
																																														7.55
																																														7.56
																																														7.57
																																														7.58
																																														7.59
																																														7.6
																																														7.61
																																														7.62
																																														7.63
																																														7.64
																																														7.65
																																														7.66
																																														7.67
																																														7.68
																																														7.69
																																														7.7
																																														7.71
																																														7.72
																																														7.73
																																														7.74
																																														7.75
																																														7.76
																																														7.77
																																														7.78
																																														7.79
																																														7.8
																																														7.81
																																														7.82
																																														7.83
																																														7.84
																																														7.85
																																														7.86
																																														7.87
																																														7.88
																																														7.89
																																														7.9
																																														7.91
																																														7.92
																																														7.93
																																														7.94
																																														7.95
																																														7.96
																																														7.97
																																														7.98
																																														7.99
																																														8		601.584	607.23
																																														8.01
																																														8.02
																																														8.03
																																														8.04
																																														8.05
																																														8.06
																																														8.07
																																														8.08
																																														8.09
																																														8.1
																																														8.11
																																														8.12
																																														8.13
																																														8.14
																																														8.15
																																														8.16
																																														8.17
																																														8.18
																																														8.19
																																														8.2
																																														8.21
																																														8.22
																																														8.23
																																														8.24
																																														8.25
																																														8.26
																																														8.27
																																														8.28
																																														8.29
																																														8.3
																																														8.31
																																														8.32
																																														8.33
																																														8.34
																																														8.35
																																														8.36
																																														8.37
																																														8.38
																																														8.39
																																														8.4
																																														8.41
																																														8.42
																																														8.43
																																														8.44
																																														8.45
																																														8.46
																																														8.47
																																														8.48
																																														8.49
																																														8.5		595.454	604.824
																																														8.51
																																														8.52
																																														8.53
																																														8.54
																																														8.55
																																														8.56
																																														8.57
																																														8.58
																																														8.59
																																														8.6
																																														8.61
																																														8.62
																																														8.63
																																														8.64
																																														8.65
																																														8.66
																																														8.67
																																														8.68
																																														8.69
																																														8.7
																																														8.71
																																														8.72
																																														8.73
																																														8.74
																																														8.75
																																														8.76
																																														8.77
																																														8.78
																																														8.79
																																														8.8
																																														8.81
																																														8.82
																																														8.83
																																														8.84
																																														8.85
																																														8.86
																																														8.87
																																														8.88
																																														8.89
																																														8.9
																																														8.91
																																														8.92
																																														8.93
																																														8.94
																																														8.95
																																														8.96
																																														8.97
																																														8.98
																																														8.99
																																														9		573.964	596.592
																																														9.01
																																														9.02
																																														9.03
																																														9.04
																																														9.05
																																														9.06
																																														9.07
																																														9.08
																																														9.09
																																														9.1
																																														9.11
																																														9.12
																																														9.13
																																														9.14
																																														9.15
																																														9.16
																																														9.17
																																														9.18
																																														9.19
																																														9.2
																																														9.21
																																														9.22
																																														9.23
																																														9.24
																																														9.25
																																														9.26
																																														9.27
																																														9.28
																																														9.29
																																														9.3
																																														9.31
																																														9.32
																																														9.33
																																														9.34
																																														9.35
																																														9.36
																																														9.37
																																														9.38
																																														9.39
																																														9.4
																																														9.41
																																														9.42
																																														9.43
																																														9.44
																																														9.45
																																														9.46
																																														9.47
																																														9.48
																																														9.49
																																														9.5		577.178	589.906
																																														9.51
																																														9.52
																																														9.53
																																														9.54
																																														9.55
																																														9.56
																																														9.57
																																														9.58
																																														9.59
																																														9.6
																																														9.61
																																														9.62
																																														9.63
																																														9.64
																																														9.65
																																														9.66
																																														9.67
																																														9.68
																																														9.69
																																														9.7
																																														9.71
																																														9.72
																																														9.73
																																														9.74
																																														9.75
																																														9.76
																																														9.77
																																														9.78
																																														9.79
																																														9.8
																																														9.81
																																														9.82
																																														9.83
																																														9.84
																																														9.85
																																														9.86
																																														9.87
																																														9.88
																																														9.89
																																														9.9
																																														9.91
																																														9.92
																																														9.93
																																														9.94
																																														9.95
																																														9.96
																																														9.97
																																														9.98
																																														9.99
																																														10		577.706	613.352
																																														10.01
																																														10.02
																																														10.03
																																														10.04
																																														10.05
																																														10.06
																																														10.07
																																														10.08
																																														10.09
																																														10.1
																																														10.11
																																														10.12
																																														10.13
																																														10.14
																																														10.15
																																														10.16
																																														10.17
																																														10.18
																																														10.19
																																														10.2
																																														10.21
																																														10.22
																																														10.23
																																														10.24
																																														10.25
																																														10.26
																																														10.27
																																														10.28
																																														10.29
																																														10.3
																																														10.31
																																														10.32
																																														10.33
																																														10.34
																																														10.35
																																														10.36
																																														10.37
																																														10.38
																																														10.39
																																														10.4
																																														10.41
																																														10.42
																																														10.43
																																														10.44
																																														10.45
																																														10.46
																																														10.47
																																														10.48
																																														10.49
																																														10.5		570.258	613.352
																																														10.51
																																														10.52
																																														10.53
																																														10.54
																																														10.55
																																														10.56
																																														10.57
																																														10.58
																																														10.59
																																														10.6
																																														10.61
																																														10.62
																																														10.63
																																														10.64
																																														10.65
																																														10.66
																																														10.67
																																														10.68
																																														10.69
																																														10.7
																																														10.71
																																														10.72
																																														10.73
																																														10.74
																																														10.75
																																														10.76
																																														10.77
																																														10.78
																																														10.79
																																														10.8
																																														10.81
																																														10.82
																																														10.83
																																														10.84
																																														10.85
																																														10.86
																																														10.87
																																														10.88
																																														10.89
																																														10.9
																																														10.91
																																														10.92
																																														10.93
																																														10.94
																																														10.95
																																														10.96
																																														10.97
																																														10.98
																																														10.99
																																														11		585.722	591.77
																																														11.01
																																														11.02
																																														11.03
																																														11.04
																																														11.05
																																														11.06
																																														11.07
																																														11.08
																																														11.09
																																														11.1
																																														11.11
																																														11.12
																																														11.13
																																														11.14
																																														11.15
																																														11.16
																																														11.17
																																														11.18
																																														11.19
																																														11.2
																																														11.21
																																														11.22
																																														11.23
																																														11.24
																																														11.25
																																														11.26
																																														11.27
																																														11.28
																																														11.29
																																														11.3
																																														11.31
																																														11.32
																																														11.33
																																														11.34
																																														11.35
																																														11.36
																																														11.37
																																														11.38
																																														11.39
																																														11.4
																																														11.41
																																														11.42
																																														11.43
																																														11.44
																																														11.45
																																														11.46
																																														11.47
																																														11.48
																																														11.49
																																														11.5		589.758	585.22
																																														11.51
																																														11.52
																																														11.53
																																														11.54
																																														11.55
																																														11.56
																																														11.57
																																														11.58
																																														11.59
																																														11.6
																																														11.61
																																														11.62
																																														11.63
																																														11.64
																																														11.65
																																														11.66
																																														11.67
																																														11.68
																																														11.69
																																														11.7
																																														11.71
																																														11.72
																																														11.73
																																														11.74
																																														11.75
																																														11.76
																																														11.77
																																														11.78
																																														11.79
																																														11.8
																																														11.81
																																														11.82
																																														11.83
																																														11.84
																																														11.85
																																														11.86
																																														11.87
																																														11.88
																																														11.89
																																														11.9
																																														11.91
																																														11.92
																																														11.93
																																														11.94
																																														11.95
																																														11.96
																																														11.97
																																														11.98
																																														11.99
																																														12		578.894	598.6
																																														12.01
																																														12.02
																																														12.03
																																														12.04
																																														12.05
																																														12.06
																																														12.07
																																														12.08
																																														12.09
																																														12.1
																																														12.11
																																														12.12
																																														12.13
																																														12.14
																																														12.15
																																														12.16
																																														12.17
																																														12.18
																																														12.19
																																														12.2
																																														12.21
																																														12.22
																																														12.23
																																														12.24
																																														12.25
																																														12.26
																																														12.27
																																														12.28
																																														12.29
																																														12.3
																																														12.31
																																														12.32
																																														12.33
																																														12.34
																																														12.35
																																														12.36
																																														12.37
																																														12.38
																																														12.39
																																														12.4
																																														12.41
																																														12.42
																																														12.43
																																														12.44
																																														12.45
																																														12.46
																																														12.47
																																														12.48
																																														12.49
																																														12.5		574.258	592.852
																																														12.51
																																														12.52
																																														12.53
																																														12.54
																																														12.55
																																														12.56
																																														12.57
																																														12.58
																																														12.59
																																														12.6
																																														12.61
																																														12.62
																																														12.63
																																														12.64
																																														12.65
																																														12.66
																																														12.67
																																														12.68
																																														12.69
																																														12.7
																																														12.71
																																														12.72
																																														12.73
																																														12.74
																																														12.75
																																														12.76
																																														12.77
																																														12.78
																																														12.79
																																														12.8
																																														12.81
																																														12.82
																																														12.83
																																														12.84
																																														12.85
																																														12.86
																																														12.87
																																														12.88
																																														12.89
																																														12.9
																																														12.91
																																														12.92
																																														12.93
																																														12.94
																																														12.95
																																														12.96
																																														12.97
																																														12.98
																																														12.99
																																														13		571.014	584.096
																																														13.01
																																														13.02
																																														13.03
																																														13.04
																																														13.05
																																														13.06
																																														13.07
																																														13.08
																																														13.09
																																														13.1
																																														13.11
																																														13.12
																																														13.13
																																														13.14
																																														13.15
																																														13.16
																																														13.17
																																														13.18
																																														13.19
																																														13.2
																																														13.21
																																														13.22
																																														13.23
																																														13.24
																																														13.25
																																														13.26
																																														13.27
																																														13.28
																																														13.29
																																														13.3
																																														13.31
																																														13.32
																																														13.33
																																														13.34
																																														13.35
																																														13.36
																																														13.37
																																														13.38
																																														13.39
																																														13.4
																																														13.41
																																														13.42
																																														13.43
																																														13.44
																																														13.45
																																														13.46
																																														13.47
																																														13.48
																																														13.49
																																														13.5		578.826	579.078
																																														13.51
																																														13.52
																																														13.53
																																														13.54
																																														13.55
																																														13.56
																																														13.57
																																														13.58
																																														13.59
																																														13.6
																																														13.61
																																														13.62
																																														13.63
																																														13.64
																																														13.65
																																														13.66
																																														13.67
																																														13.68
																																														13.69
																																														13.7
																																														13.71
																																														13.72
																																														13.73
																																														13.74
																																														13.75
																																														13.76
																																														13.77
																																														13.78
																																														13.79
																																														13.8
																																														13.81
																																														13.82
																																														13.83
																																														13.84
																																														13.85
																																														13.86
																																														13.87
																																														13.88
																																														13.89
																																														13.9
																																														13.91
																																														13.92
																																														13.93
																																														13.94
																																														13.95
																																														13.96
																																														13.97
																																														13.98
																																														13.99
																																														14		579.302	579.174
																																														14.01
																																														14.02
																																														14.03
																																														14.04
																																														14.05
																																														14.06
																																														14.07
																																														14.08
																																														14.09
																																														14.1
																																														14.11
																																														14.12
																																														14.13
																																														14.14
																																														14.15
																																														14.16
																																														14.17
																																														14.18
																																														14.19
																																														14.2
																																														14.21
																																														14.22
																																														14.23
																																														14.24
																																														14.25
																																														14.26
																																														14.27
																																														14.28
																																														14.29
																																														14.3
																																														14.31
																																														14.32
																																														14.33
																																														14.34
																																														14.35
																																														14.36
																																														14.37
																																														14.38
																																														14.39
																																														14.4
																																														14.41
																																														14.42
																																														14.43
																																														14.44
																																														14.45
																																														14.46
																																														14.47
																																														14.48
																																														14.49
																																														14.5		568.164	581.636
																																														14.51
																																														14.52
																																														14.53
																																														14.54
																																														14.55
																																														14.56
																																														14.57
																																														14.58
																																														14.59
																																														14.6
																																														14.61
																																														14.62
																																														14.63
																																														14.64
																																														14.65
																																														14.66
																																														14.67
																																														14.68
																																														14.69
																																														14.7
																																														14.71
																																														14.72
																																														14.73
																																														14.74
																																														14.75
																																														14.76
																																														14.77
																																														14.78
																																														14.79
																																														14.8
																																														14.81
																																														14.82
																																														14.83
																																														14.84
																																														14.85
																																														14.86
																																														14.87
																																														14.88
																																														14.89
																																														14.9
																																														14.91
																																														14.92
																																														14.93
																																														14.94
																																														14.95
																																														14.96
																																														14.97
																																														14.98
																																														14.99
																																														15		590.616	599.578
																																														15.01
																																														15.02
																																														15.03
																																														15.04
																																														15.05
																																														15.06
																																														15.07
																																														15.08
																																														15.09
																																														15.1
																																														15.11
																																														15.12
																																														15.13
																																														15.14
																																														15.15
																																														15.16
																																														15.17
																																														15.18
																																														15.19
																																														15.2
																																														15.21
																																														15.22
																																														15.23
																																														15.24
																																														15.25
																																														15.26
																																														15.27
																																														15.28
																																														15.29
																																														15.3
																																														15.31
																																														15.32
																																														15.33
																																														15.34
																																														15.35
																																														15.36
																																														15.37
																																														15.38
																																														15.39
																																														15.4
																																														15.41
																																														15.42
																																														15.43
																																														15.44
																																														15.45
																																														15.46
																																														15.47
																																														15.48
																																														15.49
																																														15.5		582.342	600.168
																																														15.51
																																														15.52
																																														15.53
																																														15.54
																																														15.55
																																														15.56
																																														15.57
																																														15.58
																																														15.59
																																														15.6
																																														15.61
																																														15.62
																																														15.63
																																														15.64
																																														15.65
																																														15.66
																																														15.67
																																														15.68
																																														15.69
																																														15.7
																																														15.71
																																														15.72
																																														15.73
																																														15.74
																																														15.75
																																														15.76
																																														15.77
																																														15.78
																																														15.79
																																														15.8
																																														15.81
																																														15.82
																																														15.83
																																														15.84
																																														15.85
																																														15.86
																																														15.87
																																														15.88
																																														15.89
																																														15.9
																																														15.91
																																														15.92
																																														15.93
																																														15.94
																																														15.95
																																														15.96
																																														15.97
																																														15.98
																																														15.99
																																														16		579.792	605.024
																																														16.01
																																														16.02
																																														16.03
																																														16.04
																																														16.05
																																														16.06
																																														16.07
																																														16.08
																																														16.09
																																														16.1
																																														16.11
																																														16.12
																																														16.13
																																														16.14
																																														16.15
																																														16.16
																																														16.17
																																														16.18
																																														16.19
																																														16.2
																																														16.21
																																														16.22
																																														16.23
																																														16.24
																																														16.25
																																														16.26
																																														16.27
																																														16.28
																																														16.29
																																														16.3
																																														16.31
																																														16.32
																																														16.33
																																														16.34
																																														16.35
																																														16.36
																																														16.37
																																														16.38
																																														16.39
																																														16.4
																																														16.41
																																														16.42
																																														16.43
																																														16.44
																																														16.45
																																														16.46
																																														16.47
																																														16.48
																																														16.49
																																														16.5		564.82	591.668
																																														16.51
																																														16.52
																																														16.53
																																														16.54
																																														16.55
																																														16.56
																																														16.57
																																														16.58
																																														16.59
																																														16.6
																																														16.61
																																														16.62
																																														16.63
																																														16.64
																																														16.65
																																														16.66
																																														16.67
																																														16.68
																																														16.69
																																														16.7
																																														16.71
																																														16.72
																																														16.73
																																														16.74
																																														16.75
																																														16.76
																																														16.77
																																														16.78
																																														16.79
																																														16.8
																																														16.81
																																														16.82
																																														16.83
																																														16.84
																																														16.85
																																														16.86
																																														16.87
																																														16.88
																																														16.89
																																														16.9
																																														16.91
																																														16.92
																																														16.93
																																														16.94
																																														16.95
																																														16.96
																																														16.97
																																														16.98
																																														16.99
																																														17		557.568	594.04
																																														17.01
																																														17.02
																																														17.03
																																														17.04
																																														17.05
																																														17.06
																																														17.07
																																														17.08
																																														17.09
																																														17.1
																																														17.11
																																														17.12
																																														17.13
																																														17.14
																																														17.15
																																														17.16
																																														17.17
																																														17.18
																																														17.19
																																														17.2
																																														17.21
																																														17.22
																																														17.23
																																														17.24
																																														17.25
																																														17.26
																																														17.27
																																														17.28
																																														17.29
																																														17.3
																																														17.31
																																														17.32
																																														17.33
																																														17.34
																																														17.35
																																														17.36
																																														17.37
																																														17.38
																																														17.39
																																														17.4
																																														17.41
																																														17.42
																																														17.43
																																														17.44
																																														17.45
																																														17.46
																																														17.47
																																														17.48
																																														17.49
																																														17.5		568.432	596.206
																																														17.51
																																														17.52
																																														17.53
																																														17.54
																																														17.55
																																														17.56
																																														17.57
																																														17.58
																																														17.59
																																														17.6
																																														17.61
																																														17.62
																																														17.63
																																														17.64
																																														17.65
																																														17.66
																																														17.67
																																														17.68
																																														17.69
																																														17.7
																																														17.71
																																														17.72
																																														17.73
																																														17.74
																																														17.75
																																														17.76
																																														17.77
																																														17.78
																																														17.79
																																														17.8
																																														17.81
																																														17.82
																																														17.83
																																														17.84
																																														17.85
																																														17.86
																																														17.87
																																														17.88
																																														17.89
																																														17.9
																																														17.91
																																														17.92
																																														17.93
																																														17.94
																																														17.95
																																														17.96
																																														17.97
																																														17.98
																																														17.99
																																														18		568.462	613.488
																																														18.01
																																														18.02
																																														18.03
																																														18.04
																																														18.05
																																														18.06
																																														18.07
																																														18.08
																																														18.09
																																														18.1
																																														18.11
																																														18.12
																																														18.13
																																														18.14
																																														18.15
																																														18.16
																																														18.17
																																														18.18
																																														18.19
																																														18.2
																																														18.21
																																														18.22
																																														18.23
																																														18.24
																																														18.25
																																														18.26
																																														18.27
																																														18.28
																																														18.29
																																														18.3
																																														18.31
																																														18.32
																																														18.33
																																														18.34
																																														18.35
																																														18.36
																																														18.37
																																														18.38
																																														18.39
																																														18.4
																																														18.41
																																														18.42
																																														18.43
																																														18.44
																																														18.45
																																														18.46
																																														18.47
																																														18.48
																																														18.49
																																														18.5		561.612	589.898
																																														18.51
																																														18.52
																																														18.53
																																														18.54
																																														18.55
																																														18.56
																																														18.57
																																														18.58
																																														18.59
																																														18.6
																																														18.61
																																														18.62
																																														18.63
																																														18.64
																																														18.65
																																														18.66
																																														18.67
																																														18.68
																																														18.69
																																														18.7
																																														18.71
																																														18.72
																																														18.73
																																														18.74
																																														18.75
																																														18.76
																																														18.77
																																														18.78
																																														18.79
																																														18.8
																																														18.81
																																														18.82
																																														18.83
																																														18.84
																																														18.85
																																														18.86
																																														18.87
																																														18.88
																																														18.89
																																														18.9
																																														18.91
																																														18.92
																																														18.93
																																														18.94
																																														18.95
																																														18.96
																																														18.97
																																														18.98
																																														18.99
																																														19		569.99	591.544
																																														19.01
																																														19.02
																																														19.03
																																														19.04
																																														19.05
																																														19.06
																																														19.07
																																														19.08
																																														19.09
																																														19.1
																																														19.11
																																														19.12
																																														19.13
																																														19.14
																																														19.15
																																														19.16
																																														19.17
																																														19.18
																																														19.19
																																														19.2
																																														19.21
																																														19.22
																																														19.23
																																														19.24
																																														19.25
																																														19.26
																																														19.27
																																														19.28
																																														19.29
																																														19.3
																																														19.31
																																														19.32
																																														19.33
																																														19.34
																																														19.35
																																														19.36
																																														19.37
																																														19.38
																																														19.39
																																														19.4
																																														19.41
																																														19.42
																																														19.43
																																														19.44
																																														19.45
																																														19.46
																																														19.47
																																														19.48
																																														19.49
																																														19.5		566.418	601.744
																																														19.51
																																														19.52
																																														19.53
																																														19.54
																																														19.55
																																														19.56
																																														19.57
																																														19.58
																																														19.59
																																														19.6
																																														19.61
																																														19.62
																																														19.63
																																														19.64
																																														19.65
																																														19.66
																																														19.67
																																														19.68
																																														19.69
																																														19.7
																																														19.71
																																														19.72
																																														19.73
																																														19.74
																																														19.75
																																														19.76
																																														19.77
																																														19.78
																																														19.79
																																														19.8
																																														19.81
																																														19.82
																																														19.83
																																														19.84
																																														19.85
																																														19.86
																																														19.87
																																														19.88
																																														19.89
																																														19.9
																																														19.91
																																														19.92
																																														19.93
																																														19.94
																																														19.95
[truncated: 29,830 more rows]
[truncated: 15 more columns]
