# Supplementary material for: Aversive stimuli drive hypothalamus-to-habenula excitation to promote escape behavior
Source: eLife. 2017 Sep 5;6:e30697. doi: 10.7554/eLife.30697 (PMC5606847; doi:10.7554/eLife.30697)
Supplement: Figure 1—supplement figure 2—source data 1. [file elife-30697-fig2.xlsx]

## Sheet: Figure1-figure supplement2
Panel A										Panel C									Panel D																	Panel E
Firing activity: pattern distribution in the LHb										Example PSTH Fs not excited neurons				Example PSTH Fs excited neurons					Fs+ vs Fs-: baseline firing properties																	Firing rate: local infusion of AMPA/NMDA blockers or vehicle: time-course effect, change from the baseline %
	firing pattern		regular	irregular	burst					time, bin 10 ms	Spikes			time, bin 10 ms	Spikes					Firing rate, Hz					Coefficient of variation, %					Spikes in burst %
										-2	0			-2	0				Fs -		Fs +			Fs -		Fs +			Fs -		Fs +									NBQX/AP5
	neurons		3	27	14					-1.99	0			-1.99	0				5.2		2.4			41.73		124.8			0		0.7					mouse n	1	2	3	4	5	6	7	8	9			1	2
										-1.98	1			-1.98	0				2.56		1.36			72.26		147.4			0		0				time, min
										-1.97	1			-1.97	0				25.6		0.46			25.24		236.29			0		34.48				1		96.17	104.575	95.3271	80	102.893	96.17	95.6341	98.6408	96.17			123.077	0
Panel B										-1.96	2			-1.96	2				28.17		4.4			28.81		69.64			0		2.47				2		100	95.4248	104.673	120	192.149	100	104.366	101.359	100			76.9231	200
										-1.95	1			-1.95	0				4.8		5.84			70.69		94.55			1.43		0				3 Infusion		80.9045	447.059	119.626	144	3.71901	100.493	101.871	105.631	68.1818			23.0769	143.75
Firing activity: main parameters										-1.94	0			-1.94	0				1.77		1.75			100.83		98.6			0		0				4		87.5	16.9935	125.234	184	0	78.8177	97.7131	116.117	81.1688			0	37.5
										-1.93	0			-1.93	1				23.58		0.6			49.52		141.3			3.58		22.22				5		91.5	0	158.879	200	0	78.8177	110.187	84.6602	99.3507			0	12.5
	Firing rate, Hz		Coefficient of variation, %		Spikes in burst %					-1.92	3			-1.92	0				14.3		0.75			14.4		115.38			0		19.05				6		97.9	0	177.57	200	0	97.9	151.767	69.1262	87.013			46.1538	12.5
	5.2		41.73		0					-1.91	0			-1.91	0				3.9		0.8			55.3		45.45			0.85		0				7		96.05	10.4575	157.009	240	0	96.05	120.582	68.3495	75.974			38.4615	37.5
	2.4		124.8		0.7					-1.9	1			-1.9	1				10.34		0.33			26.96		98.13			0		0
	2.56		72.26		0					-1.89	0			-1.89	2				9.14		3.6			42.76		82.38			1.6		0
	1.36		147.4		0					-1.88	1			-1.88	0				10.9		0.3			43.46		166.9			0		0
	25.6		25.24		0					-1.87	2			-1.87	0				18.4		0.3			47.48		110.1			0		19.5
	28.17		28.81		0					-1.86	1			-1.86	0				8.9		2			56.78		35.95			0.79		0
	4.8		70.69		1.43					-1.85	0			-1.85	0				0.23		0.8			64.07		110.4			0		7.5
	0.46		236.29		34.48					-1.84	1			-1.84	1				0.55		3.9			154.63		126.53			0		41.7					Panel F
	1.77		100.83		0					-1.83	1			-1.83	1				3.85		0.45			64.86		120.09			0.89		35.94
	4.4		69.64		2.47					-1.82	0			-1.82	1				8.6		1.12			37.7		198			0.97		84.21
	23.58		49.52		3.58					-1.81	0			-1.81	0				2.5		1.87			51.9		72.2			1.2		0				Normalized PSTHs, Before vehicle local infusion									Normalized PSTHs, After vehicle local infusion
	14.3		14.4		0					-1.8	2			-1.8	0				0.08		0.13			96.1		86.6			0		14.3
	5.84		94.55		0					-1.79	3			-1.79	0				35.4		0.04			32.7		79.7			0		0				mouse n		1	2	3	4	5			mouse n		1	2	3	4
	3.9		55.3		0.85					-1.78	2			-1.78	0						1.13					165.14					2.9				time, bin 10 ms									time, bin 10 ms
	1.75		98.6		0					-1.77	3			-1.77	0						1.5					112.6					0				-2		-0.00033333	-0.0035	-0.00966667	0.0273333	-0.0035			-2		-0.0005	-0.00025	0.0216667	-0.00333333
	10.34		26.96		0					-1.76	1			-1.76	1																				-1.99		-0.00033333	-0.0035	0.0236667	-0.006	-0.0035			-1.99		-0.0005	-0.00025	-0.0116667	-0.00333333
	0.6		141.3		22.22					-1.75	0			-1.75	0																				-1.98		-0.00033333	-0.0035	-0.00966667	0.0273333	-0.0035			-1.98		-0.0005	-0.00025	-0.0116667	-0.00333333
	9.14		42.76		1.6					-1.74	1			-1.74	0																				-1.97		-0.00033333	-0.0035	0.0236667	-0.006	-0.0035			-1.97		-0.0005	-0.00025	0.0216667	-0.00333333
	10.9		43.46		0					-1.73	0			-1.73	0																				-1.96		-0.00033333	-0.0035	-0.00966667	-0.006	-0.0035			-1.96		-0.0005	-0.00025	-0.0116667	-0.00333333
	18.4		47.48		0					-1.72	0			-1.72	1																				-1.95		-0.00033333	-0.0035	-0.00966667	-0.006	-0.0035			-1.95		-0.0005	-0.00025	-0.0116667	-0.00333333
	0.75		115.38		19.05					-1.71	1			-1.71	0																				-1.94		-0.00033333	-0.0035	-0.00966667	-0.006	-0.0035			-1.94		-0.0005	-0.00025	-0.0116667	-0.00333333
	8.9		56.78		0.79					-1.7	2			-1.7	0																				-1.93		-0.00033333	-0.0035	-0.00966667	-0.006	-0.0035			-1.93		-0.0005	-0.00025	-0.0116667	-0.00333333
	0.8		45.45		0					-1.69	0			-1.69	0																				-1.92		-0.00033333	-0.0035	-0.00966667	-0.006	-0.0035			-1.92		-0.0005	-0.00025	-0.0116667	-0.00333333
	0.23		64.07		0					-1.68	0			-1.68	1																				-1.91		-0.00033333	-0.0035	-0.00966667	0.0606667	-0.0035			-1.91		-0.0005	-0.00025	0.0216667	-0.00333333
	0.33		98.13		0					-1.67	1			-1.67	0																				-1.9		-0.00033333	-0.0035	0.0236667	0.0273333	-0.0035			-1.9		-0.0005	-0.00025	-0.0116667	-0.00333333
	0.55		154.63		0					-1.66	2			-1.66	1																				-1.89		-0.00033333	-0.0035	-0.00966667	-0.006	-0.0035			-1.89		-0.0005	-0.00025	0.0216667	-0.00333333
	3.85		64.86		0.89					-1.65	1			-1.65	0																				-1.88		-0.00033333	-0.0035	-0.00966667	-0.006	-0.0035			-1.88		-0.0005	-0.00025	-0.0116667	-0.00333333
	3.6		82.38		0					-1.64	1			-1.64	2																				-1.87		-0.00033333	-0.0035	-0.00966667	-0.006	-0.0035			-1.87		-0.0005	-0.00025	0.0216667	-0.00333333
	0.3		166.9		0					-1.63	1			-1.63	0																				-1.86		-0.00033333	-0.0035	-0.00966667	-0.006	-0.0035			-1.86		-0.0005	-0.00025	0.0216667	-0.00333333
	0.3		110.1		19.5					-1.62	0			-1.62	1																				-1.85		-0.00033333	-0.0035	-0.00966667	0.0273333	-0.0035			-1.85		-0.0005	-0.00025	-0.0116667	0.03
	2		35.95		0					-1.61	1			-1.61	1																				-1.84		-0.00033333	-0.0035	-0.00966667	-0.006	0.0215			-1.84		-0.0005	-0.00025	-0.0116667	0.0633333
	8.6		37.7		0.97					-1.6	2			-1.6	0																				-1.83		-0.00033333	-0.0035	-0.00966667	-0.006	0.0215			-1.83		-0.0005	-0.00025	-0.0116667	-0.00333333
	0.8		110.4		7.5					-1.59	2			-1.59	0																				-1.82		-0.00033333	-0.0035	-0.00966667	-0.006	-0.0035			-1.82		-0.0005	-0.00025	0.055	-0.00333333
	3.9		126.53		41.7					-1.58	2			-1.58	1																				-1.81		-0.00033333	-0.0035	0.057	0.0273333	0.0215			-1.81		-0.0005	-0.00025	-0.0116667	-0.00333333
	0.45		120.09		35.94					-1.57	1			-1.57	1																				-1.8		-0.00033333	-0.0035	0.0236667	-0.006	-0.0035			-1.8		-0.0005	-0.00025	-0.0116667	0.03
	1.12		198		84.21					-1.56	2			-1.56	0																				-1.79		-0.00033333	-0.0035	-0.00966667	-0.006	-0.0035			-1.79		-0.0005	-0.00025	0.0216667	0.03
	1.87		72.2		0					-1.55	0			-1.55	1																				-1.78		-0.00033333	-0.0035	-0.00966667	0.0273333	-0.0035			-1.78		-0.0005	-0.00025	-0.0116667	0.03
	2.5		51.9		1.2					-1.54	1			-1.54	1																				-1.77		-0.00033333	-0.0035	-0.00966667	0.0273333	-0.0035			-1.77		-0.0005	-0.00025	-0.0116667	-0.00333333
	0.13		86.6		14.3					-1.53	4			-1.53	0																				-1.76		-0.00033333	-0.0035	0.0236667	0.0606667	-0.0035			-1.76		-0.0005	-0.00025	0.0216667	-0.00333333
	0.04		79.7		0					-1.52	1			-1.52	0																				-1.75		-0.00033333	-0.0035	0.0236667	-0.006	-0.0035			-1.75		-0.0005	-0.00025	-0.0116667	-0.00333333
	0.08		96.1		0					-1.51	1			-1.51	1																				-1.74		-0.00033333	-0.0035	-0.00966667	-0.006	-0.0035			-1.74		-0.0005	-0.00025	0.0216667	-0.00333333
	1.13		165.14		2.9					-1.5	1			-1.5	0																				-1.73		-0.00033333	-0.0035	-0.00966667	-0.006	-0.0035			-1.73		-0.0005	-0.00025	-0.0116667	-0.00333333
	1.5		112.6		0					-1.49	2			-1.49	1																				-1.72		-0.00033333	-0.0035	-0.00966667	0.0273333	-0.0035			-1.72		-0.0005	-0.00025	0.0216667	-0.00333333
	35.4		32.7		0					-1.48	0			-1.48	2																				-1.71		-0.00033333	-0.0035	-0.00966667	-0.006	-0.0035			-1.71		-0.0005	-0.00025	-0.0116667	-0.00333333
										-1.47	0			-1.47	1																				-1.7		-0.00033333	-0.0035	-0.00966667	-0.006	-0.0035			-1.7		-0.0005	-0.00025	0.0216667	-0.00333333
										-1.46	1			-1.46	0																				-1.69		-0.00033333	-0.0035	-0.00966667	-0.006	-0.0035			-1.69		-0.0005	-0.00025	-0.0116667	-0.00333333
										-1.45	2			-1.45	0																				-1.68		-0.00033333	-0.0035	-0.00966667	-0.006	-0.0035			-1.68		-0.0005	-0.00025	0.055	-0.00333333
										-1.44	2			-1.44	0																				-1.67		-0.00033333	-0.0035	-0.00966667	-0.006	0.0215			-1.67		-0.0005	-0.00025	-0.0116667	-0.00333333
										-1.43	1			-1.43	0																				-1.66		-0.00033333	-0.0035	-0.00966667	-0.006	-0.0035			-1.66		-0.0005	-0.00025	0.0216667	-0.00333333
										-1.42	1			-1.42	1																				-1.65		-0.00033333	0.0215	-0.00966667	-0.006	-0.0035			-1.65		-0.0005	-0.00025	-0.0116667	-0.00333333
										-1.41	1			-1.41	2																				-1.64		-0.00033333	-0.0035	0.0236667	0.0606667	-0.0035			-1.64		-0.0005	-0.00025	0.0216667	-0.00333333
										-1.4	0			-1.4	0																				-1.63		-0.00033333	-0.0035	-0.00966667	-0.006	0.0215			-1.63		-0.0005	-0.00025	-0.0116667	-0.00333333
										-1.39	0			-1.39	0																				-1.62		-0.00033333	-0.0035	-0.00966667	-0.006	0.0215			-1.62		-0.0005	-0.00025	0.0216667	-0.00333333
										-1.38	0			-1.38	0																				-1.61		-0.00033333	-0.0035	-0.00966667	-0.006	-0.0035			-1.61		-0.0005	-0.00025	0.0216667	-0.00333333
										-1.37	1			-1.37	0																				-1.6		-0.00033333	-0.0035	0.0236667	-0.006	-0.0035			-1.6		-0.0005	-0.00025	-0.0116667	-0.00333333
										-1.36	1			-1.36	2																				-1.59		-0.00033333	-0.0035	-0.00966667	-0.006	-0.0035			-1.59		-0.0005	-0.00025	0.0216667	-0.00333333
										-1.35	1			-1.35	0																				-1.58		-0.00033333	-0.0035	-0.00966667	-0.006	-0.0035			-1.58		-0.0005	-0.00025	0.0216667	-0.00333333
										-1.34	2			-1.34	0																				-1.57		-0.00033333	-0.0035	-0.00966667	-0.006	-0.0035			-1.57		0.0328333	-0.00025	-0.0116667	-0.00333333
										-1.33	0			-1.33	0																				-1.56		-0.00033333	-0.0035	0.057	-0.006	-0.0035			-1.56		-0.0005	-0.00025	-0.0116667	-0.00333333
										-1.32	0			-1.32	1																				-1.55		-0.00033333	-0.0035	-0.00966667	-0.006	-0.0035			-1.55		-0.0005	-0.00025	-0.0116667	-0.00333333
										-1.31	0			-1.31	0																				-1.54		-0.00033333	-0.0035	-0.00966667	-0.006	-0.0035			-1.54		-0.0005	-0.00025	-0.0116667	-0.00333333
										-1.3	1			-1.3	0																				-1.53		-0.00033333	-0.0035	0.0236667	-0.006	-0.0035			-1.53		-0.0005	-0.00025	-0.0116667	-0.00333333
										-1.29	1			-1.29	1																				-1.52		-0.00033333	-0.0035	-0.00966667	-0.006	-0.0035			-1.52		-0.0005	-0.00025	0.0216667	-0.00333333
										-1.28	1			-1.28	0																				-1.51		-0.00033333	-0.0035	0.057	-0.006	-0.0035			-1.51		-0.0005	-0.00025	-0.0116667	-0.00333333
										-1.27	1			-1.27	0																				-1.5		-0.00033333	-0.0035	-0.00966667	-0.006	-0.0035			-1.5		-0.0005	-0.00025	0.0216667	-0.00333333
										-1.26	1			-1.26	1																				-1.49		-0.00033333	-0.0035	0.0236667	-0.006	-0.0035			-1.49		-0.0005	-0.00025	0.0216667	-0.00333333
										-1.25	2			-1.25	0																				-1.48		-0.00033333	-0.0035	0.0236667	-0.006	-0.0035			-1.48		-0.0005	-0.00025	-0.0116667	-0.00333333
										-1.24	3			-1.24	0																				-1.47		-0.00033333	-0.0035	-0.00966667	-0.006	-0.0035			-1.47		-0.0005	-0.00025	-0.0116667	-0.00333333
										-1.23	1			-1.23	1																				-1.46		-0.00033333	-0.0035	-0.00966667	-0.006	-0.0035			-1.46		-0.0005	-0.00025	-0.0116667	0.03
										-1.22	1			-1.22	0																				-1.45		-0.00033333	-0.0035	-0.00966667	-0.006	-0.0035			-1.45		-0.0005	-0.00025	0.055	0.03
										-1.21	1			-1.21	1																				-1.44		-0.00033333	-0.0035	-0.00966667	-0.006	-0.0035			-1.44		-0.0005	-0.00025	0.0216667	0.03
										-1.2	1			-1.2	0																				-1.43		-0.00033333	-0.0035	-0.00966667	-0.006	0.0465			-1.43		-0.0005	-0.00025	0.0216667	-0.00333333
										-1.19	0			-1.19	1																				-1.42		-0.00033333	-0.0035	-0.00966667	-0.006	0.0215			-1.42		-0.0005	-0.00025	-0.0116667	-0.00333333
										-1.18	2			-1.18	0																				-1.41		-0.00033333	-0.0035	-0.00966667	-0.006	-0.0035			-1.41		-0.0005	-0.00025	-0.0116667	-0.00333333
										-1.17	2			-1.17	1																				-1.4		-0.00033333	-0.0035	0.057	-0.006	-0.0035			-1.4		-0.0005	-0.00025	-0.0116667	-0.00333333
										-1.16	3			-1.16	0																				-1.39		-0.00033333	-0.0035	-0.00966667	-0.006	-0.0035			-1.39		-0.0005	-0.00025	-0.0116667	-0.00333333
										-1.15	0			-1.15	0																				-1.38		-0.00033333	-0.0035	-0.00966667	-0.006	-0.0035			-1.38		-0.0005	-0.00025	-0.0116667	-0.00333333
										-1.14	2			-1.14	1																				-1.37		-0.00033333	0.0215	0.0236667	0.0273333	-0.0035			-1.37		-0.0005	-0.00025	-0.0116667	-0.00333333
										-1.13	2			-1.13	0																				-1.36		-0.00033333	0.0215	-0.00966667	-0.006	-0.0035			-1.36		-0.0005	-0.00025	0.0216667	-0.00333333
										-1.12	0			-1.12	0																				-1.35		-0.00033333	-0.0035	0.057	-0.006	0.0215			-1.35		-0.0005	-0.00025	0.0216667	-0.00333333
										-1.11	1			-1.11	0																				-1.34		-0.00033333	-0.0035	0.0236667	-0.006	-0.0035			-1.34		-0.0005	-0.00025	-0.0116667	-0.00333333
										-1.1	1			-1.1	0																				-1.33		-0.00033333	-0.0035	0.0236667	-0.006	-0.0035			-1.33		-0.0005	-0.00025	-0.0116667	-0.00333333
										-1.09	2			-1.09	0																				-1.32		-0.00033333	-0.0035	0.0236667	-0.006	-0.0035			-1.32		-0.0005	-0.00025	-0.0116667	-0.00333333
										-1.08	0			-1.08	1																				-1.31		-0.00033333	-0.0035	-0.00966667	-0.006	-0.0035			-1.31		-0.0005	-0.00025	0.055	0.03
										-1.07	1			-1.07	1																				-1.3		-0.00033333	-0.0035	-0.00966667	-0.006	-0.0035			-1.3		-0.0005	-0.00025	-0.0116667	0.03
										-1.06	0			-1.06	0																				-1.29		-0.00033333	-0.0035	0.0236667	-0.006	-0.0035			-1.29		-0.0005	-0.00025	-0.0116667	-0.00333333
										-1.05	0			-1.05	0																				-1.28		-0.00033333	-0.0035	-0.00966667	0.0273333	-0.0035			-1.28		-0.0005	-0.00025	-0.0116667	-0.00333333
										-1.04	2			-1.04	0																				-1.27		-0.00033333	-0.0035	-0.00966667	0.0273333	-0.0035			-1.27		-0.0005	-0.00025	0.0883333	0.03
										-1.03	2			-1.03	0																				-1.26		-0.00033333	-0.0035	0.0236667	-0.006	0.0215			-1.26		-0.0005	-0.00025	0.055	-0.00333333
										-1.02	3			-1.02	1																				-1.25		-0.00033333	-0.0035	0.0236667	-0.006	-0.0035			-1.25		-0.0005	-0.00025	-0.0116667	-0.00333333
										-1.01	1			-1.01	0																				-1.24		-0.00033333	0.0215	0.0236667	-0.006	-0.0035			-1.24		-0.0005	-0.00025	0.055	-0.00333333
										-1	1			-1	0																				-1.23		-0.00033333	-0.0035	-0.00966667	-0.006	-0.0035			-1.23		-0.0005	-0.00025	-0.0116667	-0.00333333
										-0.99	1			-0.99	0																				-1.22		-0.00033333	-0.0035	0.0236667	-0.006	-0.0035			-1.22		-0.0005	-0.00025	-0.0116667	-0.00333333
										-0.98	0			-0.98	0																				-1.21		-0.00033333	-0.0035	-0.00966667	-0.006	-0.0035			-1.21		-0.0005	-0.00025	-0.0116667	-0.00333333
										-0.97	3			-0.97	0																				-1.2		-0.00033333	-0.0035	-0.00966667	-0.006	-0.0035			-1.2		-0.0005	-0.00025	-0.0116667	-0.00333333
										-0.96	1			-0.96	0																				-1.19		-0.00033333	0.0215	-0.00966667	-0.006	0.0215			-1.19		-0.0005	-0.00025	-0.0116667	-0.00333333
										-0.95	2			-0.95	0																				-1.18		-0.00033333	-0.0035	0.057	-0.006	0.0215			-1.18		-0.0005	-0.00025	-0.0116667	-0.00333333
										-0.94	3			-0.94	0																				-1.17		-0.00033333	-0.0035	-0.00966667	-0.006	-0.0035			-1.17		-0.0005	-0.00025	-0.0116667	-0.00333333
										-0.93	0			-0.93	0																				-1.16		-0.00033333	-0.0035	-0.00966667	0.0273333	-0.0035			-1.16		-0.0005	-0.00025	-0.0116667	-0.00333333
										-0.92	2			-0.92	0																				-1.15		-0.00033333	-0.0035	-0.00966667	-0.006	-0.0035			-1.15		-0.0005	-0.00025	-0.0116667	-0.00333333
										-0.91	1			-0.91	1																				-1.14		-0.00033333	-0.0035	-0.00966667	0.0273333	-0.0035			-1.14		-0.0005	-0.00025	0.0216667	-0.00333333
										-0.9	0			-0.9	0																				-1.13		-0.00033333	-0.0035	-0.00966667	0.0273333	-0.0035			-1.13		-0.0005	-0.00025	-0.0116667	-0.00333333
										-0.89	2			-0.89	1																				-1.12		-0.00033333	-0.0035	0.0236667	-0.006	-0.0035			-1.12		-0.0005	-0.00025	0.0216667	-0.00333333
										-0.88	0			-0.88	1																				-1.11		-0.00033333	0.0215	-0.00966667	0.0273333	-0.0035			-1.11		-0.0005	-0.00025	-0.0116667	-0.00333333
										-0.87	1			-0.87	0																				-1.1		-0.00033333	-0.0035	-0.00966667	0.0606667	-0.0035			-1.1		-0.0005	-0.00025	0.055	-0.00333333
										-0.86	3			-0.86	0																				-1.09		-0.00033333	-0.0035	-0.00966667	-0.006	0.0215			-1.09		0.0328333	-0.00025	0.0216667	-0.00333333
										-0.85	2			-0.85	0																				-1.08		-0.00033333	-0.0035	-0.00966667	0.0273333	-0.0035			-1.08		-0.0005	-0.00025	0.0216667	-0.00333333
										-0.84	0			-0.84	0																				-1.07		-0.00033333	-0.0035	-0.00966667	0.0273333	-0.0035			-1.07		-0.0005	-0.00025	0.0216667	-0.00333333
										-0.83	1			-0.83	0																				-1.06		-0.00033333	0.0215	-0.00966667	-0.006	-0.0035			-1.06		-0.0005	-0.00025	-0.0116667	-0.00333333
										-0.82	1			-0.82	0																				-1.05		-0.00033333	-0.0035	0.0236667	-0.006	-0.0035			-1.05		-0.0005	-0.00025	-0.0116667	-0.00333333
										-0.81	0			-0.81	1																				-1.04		-0.00033333	-0.0035	-0.00966667	0.0273333	-0.0035			-1.04		-0.0005	-0.00025	-0.0116667	0.03
										-0.8	1			-0.8	1																				-1.03		-0.00033333	-0.0035	0.0236667	-0.006	-0.0035			-1.03		-0.0005	-0.00025	0.0216667	-0.00333333
										-0.79	1			-0.79	0																				-1.02		-0.00033333	-0.0035	-0.00966667	-0.006	-0.0035			-1.02		-0.0005	-0.00025	-0.0116667	-0.00333333
										-0.78	2			-0.78	1																				-1.01		-0.00033333	-0.0035	-0.00966667	-0.006	-0.0035			-1.01		-0.0005	-0.00025	-0.0116667	-0.00333333
										-0.77	0			-0.77	0																				-1		-0.00033333	-0.0035	-0.00966667	-0.006	-0.0035			-1		-0.0005	-0.00025	0.0216667	-0.00333333
										-0.76	1			-0.76	1																				-0.99		-0.00033333	-0.0035	0.0236667	-0.006	-0.0035			-0.99		-0.0005	-0.00025	-0.0116667	-0.00333333
										-0.75	1			-0.75	0																				-0.98		-0.00033333	0.0215	-0.00966667	0.0273333	-0.0035			-0.98		-0.0005	-0.00025	-0.0116667	-0.00333333
										-0.74	0			-0.74	0																				-0.97		-0.00033333	-0.0035	-0.00966667	0.0273333	-0.0035			-0.97		-0.0005	-0.00025	0.055	-0.00333333
										-0.73	1			-0.73	0																				-0.96		-0.00033333	-0.0035	0.0236667	0.0273333	-0.0035			-0.96		-0.0005	-0.00025	-0.0116667	-0.00333333
										-0.72	0			-0.72	0																				-0.95		-0.00033333	0.0215	0.0236667	-0.006	-0.0035			-0.95		-0.0005	-0.00025	-0.0116667	-0.00333333
										-0.71	2			-0.71	1																				-0.94		-0.00033333	-0.0035	-0.00966667	-0.006	-0.0035			-0.94		-0.0005	-0.00025	-0.0116667	-0.00333333
										-0.7	1			-0.7	0																				-0.93		-0.00033333	0.0215	-0.00966667	-0.006	-0.0035			-0.93		-0.0005	-0.00025	0.0216667	-0.00333333
										-0.69	0			-0.69	1																				-0.92		-0.00033333	-0.0035	0.057	-0.006	-0.0035			-0.92		-0.0005	-0.00025	0.055	-0.00333333
										-0.68	0			-0.68	0																				-0.91		-0.00033333	-0.0035	-0.00966667	-0.006	-0.0035			-0.91		-0.0005	-0.00025	0.0216667	-0.00333333
										-0.67	0			-0.67	1																				-0.9		-0.00033333	0.0465	-0.00966667	-0.006	-0.0035			-0.9		-0.0005	0.02475	-0.0116667	-0.00333333
										-0.66	1			-0.66	0																				-0.89		-0.00033333	-0.0035	0.0236667	-0.006	-0.0035			-0.89		-0.0005	-0.00025	-0.0116667	-0.00333333
										-0.65	2			-0.65	2																				-0.88		-0.00033333	-0.0035	0.0236667	-0.006	-0.0035			-0.88		-0.0005	-0.00025	0.0216667	-0.00333333
										-0.64	1			-0.64	2																				-0.87		0.033	-0.0035	-0.00966667	-0.006	-0.0035			-0.87		-0.0005	-0.00025	0.0216667	-0.00333333
										-0.63	0			-0.63	2																				-0.86		-0.00033333	0.0215	0.0236667	-0.006	-0.0035			-0.86		-0.0005	-0.00025	-0.0116667	-0.00333333
										-0.62	1			-0.62	1																				-0.85		-0.00033333	0.0215	-0.00966667	-0.006	-0.0035			-0.85		-0.0005	-0.00025	-0.0116667	-0.00333333
										-0.61	0			-0.61	3																				-0.84		-0.00033333	0.0215	0.0236667	-0.006	-0.0035			-0.84		-0.0005	-0.00025	-0.0116667	-0.00333333
										-0.6	0			-0.6	0																				-0.83		-0.00033333	-0.0035	-0.00966667	-0.006	-0.0035			-0.83		-0.0005	-0.00025	-0.0116667	0.03
										-0.59	0			-0.59	1																				-0.82		-0.00033333	-0.0035	-0.00966667	-0.006	-0.0035			-0.82		-0.0005	-0.00025	-0.0116667	-0.00333333
										-0.58	4			-0.58	1																				-0.81		-0.00033333	0.0215	-0.00966667	-0.006	-0.0035			-0.81		-0.0005	-0.00025	0.0216667	-0.00333333
										-0.57	0			-0.57	0																				-0.8		-0.00033333	-0.0035	-0.00966667	-0.006	-0.0035			-0.8		-0.0005	-0.00025	-0.0116667	-0.00333333
										-0.56	2			-0.56	1																				-0.79		-0.00033333	-0.0035	-0.00966667	-0.006	-0.0035			-0.79		-0.0005	-0.00025	-0.0116667	-0.00333333
										-0.55	0			-0.55	2																				-0.78		-0.00033333	-0.0035	-0.00966667	-0.006	-0.0035			-0.78		-0.0005	-0.00025	-0.0116667	-0.00333333
										-0.54	0			-0.54	2																				-0.77		-0.00033333	-0.0035	-0.00966667	-0.006	-0.0035			-0.77		-0.0005	-0.00025	-0.0116667	-0.00333333
										-0.53	0			-0.53	1																				-0.76		-0.00033333	-0.0035	-0.00966667	-0.006	0.0215			-0.76		-0.0005	-0.00025	-0.0116667	-0.00333333
										-0.52	2			-0.52	0																				-0.75		-0.00033333	-0.0035	-0.00966667	-0.006	-0.0035			-0.75		-0.0005	-0.00025	0.0216667	-0.00333333
										-0.51	0			-0.51	0																				-0.74		-0.00033333	0.0215	-0.00966667	-0.006	-0.0035			-0.74		-0.0005	-0.00025	-0.0116667	-0.00333333
										-0.5	2			-0.5	0																				-0.73		-0.00033333	0.0215	-0.00966667	-0.006	-0.0035			-0.73		-0.0005	-0.00025	0.0216667	-0.00333333
										-0.49	4			-0.49	0																				-0.72		-0.00033333	0.0465	-0.00966667	-0.006	-0.0035			-0.72		-0.0005	-0.00025	-0.0116667	-0.00333333
										-0.48	1			-0.48	0																				-0.71		-0.00033333	-0.0035	-0.00966667	-0.006	-0.0035			-0.71		-0.0005	-0.00025	0.0216667	-0.00333333
										-0.47	2			-0.47	0																				-0.7		-0.00033333	-0.0035	0.0236667	-0.006	-0.0035			-0.7		-0.0005	-0.00025	-0.0116667	-0.00333333
										-0.46	0			-0.46	0																				-0.69		-0.00033333	-0.0035	0.057	-0.006	-0.0035			-0.69		-0.0005	-0.00025	-0.0116667	-0.00333333
										-0.45	1			-0.45	0																				-0.68		-0.00033333	-0.0035	-0.00966667	-0.006	-0.0035			-0.68		0.0328333	-0.00025	-0.0116667	-0.00333333
										-0.44	1			-0.44	1																				-0.67		-0.00033333	-0.0035	-0.00966667	-0.006	-0.0035			-0.67		-0.0005	0.02475	-0.0116667	-0.00333333
										-0.43	0			-0.43	1																				-0.66		-0.00033333	-0.0035	0.0236667	-0.006	-0.0035			-0.66		-0.0005	-0.00025	-0.0116667	-0.00333333
										-0.42	0			-0.42	0																				-0.65		-0.00033333	-0.0035	-0.00966667	-0.006	-0.0035			-0.65		-0.0005	-0.00025	-0.0116667	-0.00333333
										-0.41	1			-0.41	0																				-0.64		-0.00033333	-0.0035	-0.00966667	-0.006	-0.0035			-0.64		-0.0005	-0.00025	-0.0116667	-0.00333333
										-0.4	0			-0.4	0																				-0.63		-0.00033333	-0.0035	-0.00966667	-0.006	-0.0035			-0.63		-0.0005	-0.00025	-0.0116667	-0.00333333
										-0.39	0			-0.39	0																				-0.62		-0.00033333	-0.0035	-0.00966667	-0.006	-0.0035			-0.62		-0.0005	-0.00025	-0.0116667	-0.00333333
										-0.38	0			-0.38	0																				-0.61		-0.00033333	-0.0035	-0.00966667	-0.006	-0.0035			-0.61		-0.0005	-0.00025	-0.0116667	-0.00333333
										-0.37	0			-0.37	0																				-0.6		-0.00033333	-0.0035	-0.00966667	-0.006	-0.0035			-0.6		-0.0005	-0.00025	-0.0116667	-0.00333333
										-0.36	1			-0.36	0																				-0.59		-0.00033333	-0.0035	-0.00966667	-0.006	-0.0035			-0.59		-0.0005	-0.00025	-0.0116667	-0.00333333
										-0.35	1			-0.35	0																				-0.58		-0.00033333	-0.0035	0.0236667	-0.006	-0.0035			-0.58		-0.0005	-0.00025	-0.0116667	-0.00333333
										-0.34	5			-0.34	0																				-0.57		-0.00033333	-0.0035	-0.00966667	-0.006	-0.0035			-0.57		-0.0005	-0.00025	-0.0116667	-0.00333333
										-0.33	1			-0.33	1																				-0.56		-0.00033333	-0.0035	-0.00966667	-0.006	-0.0035			-0.56		-0.0005	-0.00025	-0.0116667	-0.00333333
										-0.32	1			-0.32	0																				-0.55		-0.00033333	-0.0035	-0.00966667	-0.006	-0.0035			-0.55		-0.0005	-0.00025	-0.0116667	-0.00333333
										-0.31	0			-0.31	0																				-0.54		-0.00033333	-0.0035	-0.00966667	-0.006	0.0215			-0.54		-0.0005	-0.00025	-0.0116667	-0.00333333
										-0.3	1			-0.3	0																				-0.53		-0.00033333	0.0215	-0.00966667	-0.006	-0.0035			-0.53		-0.0005	-0.00025	-0.0116667	0.03
										-0.29	2			-0.29	0																				-0.52		-0.00033333	-0.0035	-0.00966667	-0.006	0.0215			-0.52		-0.0005	-0.00025	-0.0116667	0.03
										-0.28	0			-0.28	1																				-0.51		-0.00033333	0.0215	0.0236667	-0.006	0.0465			-0.51		-0.0005	-0.00025	-0.0116667	0.03
										-0.27	1			-0.27	0																				-0.5		-0.00033333	-0.0035	-0.00966667	-0.006	-0.0035			-0.5		-0.0005	-0.00025	-0.0116667	0.03
										-0.26	1			-0.26	1																				-0.49		-0.00033333	-0.0035	-0.00966667	-0.006	-0.0035			-0.49		-0.0005	-0.00025	0.055	-0.00333333
										-0.25	1			-0.25	0																				-0.48		-0.00033333	-0.0035	0.0236667	-0.006	0.0215			-0.48		-0.0005	-0.00025	-0.0116667	-0.00333333
										-0.24	2			-0.24	0																				-0.47		-0.00033333	-0.0035	-0.00966667	-0.006	-0.0035			-0.47		-0.0005	-0.00025	-0.0116667	-0.00333333
										-0.23	1			-0.23	0																				-0.46		-0.00033333	-0.0035	-0.00966667	-0.006	-0.0035			-0.46		-0.0005	-0.00025	0.0216667	-0.00333333
										-0.22	1			-0.22	0																				-0.45		-0.00033333	-0.0035	0.0236667	-0.006	-0.0035			-0.45		-0.0005	-0.00025	-0.0116667	0.03
										-0.21	0			-0.21	1																				-0.44		-0.00033333	0.0215	-0.00966667	-0.006	-0.0035			-0.44		-0.0005	-0.00025	-0.0116667	-0.00333333
										-0.2	3			-0.2	0																				-0.43		-0.00033333	-0.0035	-0.00966667	-0.006	-0.0035			-0.43		-0.0005	-0.00025	-0.0116667	-0.00333333
										-0.19	0			-0.19	1																				-0.42		-0.00033333	-0.0035	0.0236667	-0.006	-0.0035			-0.42		-0.0005	-0.00025	-0.0116667	-0.00333333
										-0.18	1			-0.18	1																				-0.41		-0.00033333	-0.0035	-0.00966667	-0.006	-0.0035			-0.41		-0.0005	-0.00025	-0.0116667	-0.00333333
										-0.17	3			-0.17	1																				-0.4		-0.00033333	-0.0035	-0.00966667	0.0273333	-0.0035			-0.4		-0.0005	-0.00025	0.0216667	-0.00333333
										-0.16	2			-0.16	1																				-0.39		-0.00033333	-0.0035	-0.00966667	-0.006	-0.0035			-0.39		-0.0005	-0.00025	-0.0116667	-0.00333333
										-0.15	0			-0.15	0																				-0.38		-0.00033333	-0.0035	-0.00966667	0.0273333	0.0215			-0.38		-0.0005	-0.00025	-0.0116667	-0.00333333
										-0.14	1			-0.14	0																				-0.37		-0.00033333	-0.0035	-0.00966667	-0.006	0.0215			-0.37		-0.0005	-0.00025	-0.0116667	-0.00333333
										-0.13	0			-0.13	1																				-0.36		-0.00033333	-0.0035	-0.00966667	-0.006	-0.0035			-0.36		-0.0005	-0.00025	-0.0116667	-0.00333333
										-0.12	1			-0.12	0																				-0.35		-0.00033333	-0.0035	-0.00966667	-0.006	0.0215			-0.35		-0.0005	-0.00025	0.055	-0.00333333
										-0.11	0			-0.11	0																				-0.34		-0.00033333	-0.0035	-0.00966667	-0.006	-0.0035			-0.34		-0.0005	-0.00025	-0.0116667	-0.00333333
										-0.1	3			-0.1	0																				-0.33		-0.00033333	-0.0035	-0.00966667	-0.006	0.0215			-0.33		-0.0005	-0.00025	-0.0116667	-0.00333333
										-0.09	0			-0.09	0																				-0.32		-0.00033333	-0.0035	-0.00966667	-0.006	0.0215			-0.32		-0.0005	-0.00025	-0.0116667	-0.00333333
										-0.08	0			-0.08	0																				-0.31		-0.00033333	-0.0035	-0.00966667	-0.006	-0.0035			-0.31		-0.0005	-0.00025	-0.0116667	-0.00333333
										-0.07	0			-0.07	0																				-0.3		-0.00033333	-0.0035	-0.00966667	0.094	0.0215			-0.3		-0.0005	-0.00025	-0.0116667	-0.00333333
										-0.06	2			-0.06	0																				-0.29		-0.00033333	-0.0035	-0.00966667	-0.006	-0.0035			-0.29		-0.0005	-0.00025	-0.0116667	-0.00333333
										-0.05	0			-0.05	0																				-0.28		-0.00033333	-0.0035	-0.00966667	0.0273333	-0.0035			-0.28		-0.0005	-0.00025	-0.0116667	-0.00333333
										-0.04	0			-0.04	2																				-0.27		-0.00033333	0.0215	-0.00966667	-0.006	-0.0035			-0.27		-0.0005	-0.00025	-0.0116667	-0.00333333
										-0.03	0			-0.03	1																				-0.26		-0.00033333	-0.0035	-0.00966667	-0.006	-0.0035			-0.26		-0.0005	-0.00025	-0.0116667	-0.00333333
										-0.02	2			-0.02	0																				-0.25		-0.00033333	-0.0035	-0.00966667	-0.006	-0.0035			-0.25		-0.0005	-0.00025	-0.0116667	-0.00333333
										-0.01	0			-0.01	0																				-0.24		-0.00033333	-0.0035	0.0236667	-0.006	-0.0035			-0.24		-0.0005	-0.00025	-0.0116667	-0.00333333
										0	1			0	1																				-0.23		-0.00033333	-0.0035	-0.00966667	-0.006	-0.0035			-0.23		-0.0005	-0.00025	-0.0116667	-0.00333333
										0.01	0			0.01	0																				-0.22		-0.00033333	0.0215	-0.00966667	-0.006	-0.0035			-0.22		-0.0005	-0.00025	-0.0116667	-0.00333333
										0.02	2			0.02	1																				-0.21		0.033	0.0215	-0.00966667	-0.006	-0.0035			-0.21		-0.0005	-0.00025	-0.0116667	-0.00333333
										0.03	0			0.03	1																				-0.2		-0.00033333	-0.0035	-0.00966667	-0.006	-0.0035			-0.2		-0.0005	-0.00025	-0.0116667	-0.00333333
										0.04	2			0.04	0																				-0.19		-0.00033333	-0.0035	0.0236667	-0.006	-0.0035			-0.19		-0.0005	-0.00025	-0.0116667	-0.00333333
										0.05	0			0.05	3																				-0.18		-0.00033333	-0.0035	-0.00966667	-0.006	-0.0035			-0.18		-0.0005	-0.00025	-0.0116667	0.03
										0.06	0			0.06	6																				-0.17		-0.00033333	0.0215	-0.00966667	-0.006	-0.0035			-0.17		-0.0005	-0.00025	-0.0116667	-0.00333333
										0.07	1			0.07	7																				-0.16		-0.00033333	-0.0035	-0.00966667	-0.006	-0.0035			-0.16		-0.0005	-0.00025	-0.0116667	-0.00333333
										0.08	0			0.08	2																				-0.15		-0.00033333	-0.0035	-0.00966667	-0.006	-0.0035			-0.15		-0.0005	-0.00025	-0.0116667	-0.00333333
										0.09	2			0.09	0																				-0.14		-0.00033333	-0.0035	-0.00966667	-0.006	-0.0035			-0.14		-0.0005	-0.00025	-0.0116667	-0.00333333
										0.1	2			0.1	1																				-0.13		-0.00033333	-0.0035	-0.00966667	-0.006	0.0215			-0.13		-0.0005	-0.00025	-0.0116667	-0.00333333
										0.11	0			0.11	0																				-0.12		-0.00033333	-0.0035	-0.00966667	-0.006	-0.0035			-0.12		-0.0005	-0.00025	-0.0116667	-0.00333333
										0.12	1			0.12	1																				-0.11		-0.00033333	-0.0035	-0.00966667	-0.006	-0.0035			-0.11		-0.0005	-0.00025	-0.0116667	-0.00333333
										0.13	1			0.13	0																				-0.1		-0.00033333	-0.0035	-0.00966667	-0.006	-0.0035			-0.1		-0.0005	-0.00025	-0.0116667	-0.00333333
										0.14	0			0.14	1																				-0.09		-0.00033333	-0.0035	-0.00966667	-0.006	-0.0035			-0.09		-0.0005	-0.00025	-0.0116667	-0.00333333
										0.15	1			0.15	0																				-0.08		-0.00033333	-0.0035	0.057	-0.006	-0.0035			-0.08		-0.0005	-0.00025	-0.0116667	-0.00333333
										0.16	0			0.16	2																				-0.07		-0.00033333	0.0215	-0.00966667	-0.006	-0.0035			-0.07		-0.0005	-0.00025	-0.0116667	-0.00333333
										0.17	1			0.17	1																				-0.06		-0.00033333	-0.0035	-0.00966667	-0.006	-0.0035			-0.06		-0.0005	-0.00025	0.0216667	-0.00333333
										0.18	0			0.18	2																				-0.05		-0.00033333	-0.0035	-0.00966667	-0.006	-0.0035			-0.05		-0.0005	-0.00025	0.0216667	-0.00333333
										0.19	0			0.19	0																				-0.04		-0.00033333	-0.0035	0.0236667	-0.006	-0.0035			-0.04		-0.0005	-0.00025	-0.0116667	-0.00333333
										0.2	2			0.2	0																				-0.03		-0.00033333	-0.0035	-0.00966667	-0.006	-0.0035			-0.03		-0.0005	-0.00025	0.0216667	-0.00333333
										0.21	0			0.21	1																				-0.02		-0.00033333	-0.0035	-0.00966667	-0.006	0.0215			-0.02		-0.0005	-0.00025	-0.0116667	-0.00333333
										0.22	1			0.22	2																				-0.01		-0.00033333	0.0215	-0.00966667	-0.006	-0.0035			-0.01		-0.0005	-0.00025	-0.0116667	-0.00333333
										0.23	2			0.23	0																				0		-0.00033333	-0.0035	-0.00966667	0.227333	0.2715			0		-0.0005	-0.00025	-0.0116667	0.196667
										0.24	0			0.24	0																				0.01		0.499667	0.3465	0.0236667	0.627333	0.5465			0.01		0.566167	0.09975	-0.0116667	0.73
										0.25	2			0.25	2																				0.02		0.666333	0.7215	-0.00966667	0.427333	0.1215			0.02		0.6995	0.77475	-0.0116667	0.296667
										0.26	1			0.26	0																				0.03		0.699667	0.3465	-0.00966667	0.227333	0.0965			0.03		0.3995	0.29975	-0.0116667	0.23
										0.27	0			0.27	0																				0.04		-0.00033333	-0.0035	-0.00966667	0.0273333	-0.0035			0.04		0.0661667	-0.00025	-0.0116667	0.03
										0.28	1			0.28	0																				0.05		-0.00033333	-0.0035	0.0236667	-0.006	-0.0035			0.05		-0.0005	-0.00025	-0.0116667	-0.00333333
										0.29	2			0.29	0																				0.06		-0.00033333	-0.0035	0.0236667	-0.006	-0.0035			0.06		-0.0005	-0.00025	0.055	-0.00333333
										0.3	1			0.3	1																				0.07		-0.00033333	-0.0035	-0.00966667	-0.006	-0.0035			0.07		-0.0005	-0.00025	0.121667	-0.00333333
										0.31	0			0.31	0																				0.08		-0.00033333	-0.0035	0.0903333	-0.006	-0.0035			0.08		-0.0005	-0.00025	0.155	-0.00333333
										0.32	2			0.32	1																				0.09		-0.00033333	-0.0035	0.157	-0.006	-0.0035			0.09		-0.0005	-0.00025	0.121667	-0.00333333
										0.33	2			0.33	0																				0.1		-0.00033333	0.0215	0.057	-0.006	-0.0035			0.1		-0.0005	-0.00025	0.321667	-0.00333333
										0.34	1			0.34	0																				0.11		-0.00033333	-0.0035	-0.00966667	-0.006	-0.0035			0.11		-0.0005	-0.00025	0.055	-0.00333333
										0.35	0			0.35	0																				0.12		-0.00033333	0.0715	-0.00966667	-0.006	-0.0035			0.12		-0.0005	-0.00025	-0.0116667	0.03
										0.36	0			0.36	0																				0.13		-0.00033333	-0.0035	0.0236667	-0.006	-0.0035			0.13		-0.0005	-0.00025	-0.0116667	-0.00333333
										0.37	2			0.37	0																				0.14		-0.00033333	-0.0035	0.0236667	-0.006	-0.0035			0.14		-0.0005	-0.00025	-0.0116667	-0.00333333
										0.38	1			0.38	1																				0.15		-0.00033333	-0.0035	-0.00966667	-0.006	-0.0035			0.15		-0.0005	-0.00025	-0.0116667	0.0966667
										0.39	0			0.39	0																				0.16		0.0663333	-0.0035	-0.00966667	-0.006	-0.0035			0.16		-0.0005	-0.00025	-0.0116667	-0.00333333
										0.4	0			0.4	0																				0.17		0.033	-0.0035	-0.00966667	-0.006	-0.0035			0.17		0.0328333	0.02475	-0.0116667	-0.00333333
										0.41	0			0.41	1																				0.18		0.166333	0.0715	0.0236667	-0.006	-0.0035			0.18		0.0328333	-0.00025	-0.0116667	-0.00333333
										0.42	2			0.42	0																				0.19		0.0663333	0.0465	0.0236667	-0.006	-0.0035			0.19		0.1995	0.04975	-0.0116667	-0.00333333
										0.43	1			0.43	0																				0.2		0.266333	0.1965	0.0236667	-0.006	-0.0035			0.2		0.132833	0.12475	-0.0116667	-0.00333333
										0.44	0			0.44	0																				0.21		-0.00033333	0.0465	-0.00966667	-0.006	-0.0035			0.21		0.0328333	-0.00025	-0.0116667	-0.00333333
										0.45	0			0.45	0																				0.22		0.0663333	0.0215	-0.00966667	-0.006	-0.0035			0.22		0.166167	0.04975	-0.0116667	-0.00333333
										0.46	0			0.46	1																				0.23		0.0663333	0.0715	-0.00966667	-0.006	-0.0035			0.23		0.0661667	0.04975	-0.0116667	-0.00333333
										0.47	1			0.47	0																				0.24		0.0663333	0.0465	0.057	-0.006	-0.0035			0.24		0.0328333	0.04975	-0.0116667	-0.00333333
										0.48	1			0.48	0																				0.25		-0.00033333	0.0215	-0.00966667	-0.006	-0.0035			0.25		0.0328333	-0.00025	-0.0116667	-0.00333333
										0.49	0			0.49	1																				0.26		-0.00033333	0.0215	0.0236667	-0.006	-0.0035			0.26		0.0328333	-0.00025	0.055	-0.00333333
										0.5	1			0.5	0																				0.27		-0.00033333	0.0215	0.0236667	-0.006	-0.0035			0.27		-0.0005	-0.00025	0.0216667	-0.00333333
										0.51	0			0.51	0																				0.28		-0.00033333	0.0215	0.057	-0.006	-0.0035			0.28		0.0328333	-0.00025	-0.0116667	-0.00333333
										0.52	1			0.52	1																				0.29		-0.00033333	-0.0035	-0.00966667	-0.006	-0.0035			0.29		0.0661667	0.02475	-0.0116667	-0.00333333
										0.53	0			0.53	1																				0.3		-0.00033333	-0.0035	-0.00966667	-0.006	-0.0035			0.3		-0.0005	-0.00025	-0.0116667	-0.00333333
										0.54	0			0.54	1																				0.31		0.033	-0.0035	-0.00966667	-0.006	0.0215			0.31		0.0328333	-0.00025	0.0216667	0.03
										0.55	0			0.55	0																				0.32		-0.00033333	-0.0035	0.0236667	-0.006	-0.0035			0.32		0.0328333	0.02475	0.055	-0.00333333
										0.56	2			0.56	0																				0.33		-0.00033333	-0.0035	0.0236667	-0.006	-0.0035			0.33		-0.0005	-0.00025	0.0216667	-0.00333333
										0.57	1			0.57	0																				0.34		-0.00033333	0.0215	-0.00966667	-0.006	-0.0035			0.34		-0.0005	-0.00025	0.055	-0.00333333
										0.58	4			0.58	0																				0.35		-0.00033333	0.0215	-0.00966667	-0.006	-0.0035			0.35		0.0328333	-0.00025	0.055	-0.00333333
										0.59	0			0.59	1																				0.36		-0.00033333	0.0215	-0.00966667	-0.006	-0.0035			0.36		-0.0005	-0.00025	-0.0116667	-0.00333333
										0.6	1			0.6	0																				0.37		-0.00033333	0.0215	-0.00966667	-0.006	-0.0035			0.37		-0.0005	-0.00025	0.0216667	-0.00333333
										0.61	1			0.61	0																				0.38		0.033	0.0215	-0.00966667	-0.006	-0.0035			0.38		0.0328333	-0.00025	-0.0116667	-0.00333333
										0.62	1			0.62	0																				0.39		-0.00033333	-0.0035	-0.00966667	-0.006	-0.0035			0.39		-0.0005	-0.00025	-0.0116667	-0.00333333
										0.63	1			0.63	0																				0.4		-0.00033333	-0.0035	-0.00966667	-0.006	-0.0035			0.4		-0.0005	-0.00025	-0.0116667	-0.00333333
										0.64	2			0.64	1																				0.41		0.033	0.0215	0.0236667	-0.006	-0.0035			0.41		0.0661667	0.02475	-0.0116667	-0.00333333
										0.65	0			0.65	0																				0.42		0.033	0.0465	-0.00966667	0.0273333	-0.0035			0.42		0.0661667	-0.00025	0.0216667	-0.00333333
										0.66	0			0.66	0																				0.43		0.033	0.0215	-0.00966667	0.0273333	-0.0035			0.43		0.0328333	-0.00025	-0.0116667	-0.00333333
										0.67	1			0.67	0																				0.44		0.033	0.0215	0.0236667	-0.006	-0.0035			0.44		-0.0005	-0.00025	-0.0116667	-0.00333333
										0.68	0			0.68	0																				0.45		-0.00033333	0.0465	-0.00966667	-0.006	-0.0035			0.45		0.0328333	-0.00025	0.055	-0.00333333
										0.69	0			0.69	0																				0.46		-0.00033333	0.0465	0.0236667	-0.006	-0.0035			0.46		0.0328333	-0.00025	0.0216667	-0.00333333
										0.7	1			0.7	2																				0.47		0.033	-0.0035	0.0903333	-0.006	0.0215			0.47		-0.0005	-0.00025	-0.0116667	-0.00333333
										0.71	0			0.71	0																				0.48		0.0996667	-0.0035	0.0236667	-0.006	-0.0035			0.48		-0.0005	0.02475	-0.0116667	-0.00333333
										0.72	1			0.72	0																				0.49		0.033	-0.0035	-0.00966667	-0.006	-0.0035			0.49		0.0328333	-0.00025	0.0216667	-0.00333333
										0.73	0			0.73	2																				0.5		-0.00033333	0.0215	-0.00966667	-0.006	-0.0035			0.5		-0.0005	-0.00025	-0.0116667	-0.00333333
										0.74	1			0.74	1																				0.51		0.0663333	0.0215	-0.00966667	-0.006	-0.0035			0.51		0.0328333	-0.00025	-0.0116667	-0.00333333
										0.75	0			0.75	0																				0.52		0.0663333	0.0215	-0.00966667	0.0273333	-0.0035			0.52		0.0328333	0.02475	0.0216667	-0.00333333
										0.76	4			0.76	0																				0.53		0.033	0.0215	-0.00966667	-0.006	-0.0035			0.53		0.0661667	-0.00025	-0.0116667	-0.00333333
										0.77	0			0.77	0																				0.54		0.133	-0.0035	-0.00966667	-0.006	-0.0035			0.54		0.0661667	-0.00025	-0.0116667	-0.00333333
										0.78	0			0.78	1																				0.55		0.299667	0.0715	0.0236667	-0.006	-0.0035			0.55		0.1995	0.04975	-0.0116667	-0.00333333
										0.79	1			0.79	1																				0.56		0.433	0.0715	-0.00966667	-0.006	-0.0035			0.56		0.1995	0.04975	0.055	-0.00333333
										0.8	1			0.8	0																				0.57		0.199667	0.0465	-0.00966667	-0.006	-0.0035			0.57		0.0328333	0.07475	-0.0116667	-0.00333333
										0.81	1			0.81	2																				0.58		0.033	0.0215	-0.00966667	-0.006	-0.0035			0.58		0.0328333	0.02475	-0.0116667	-0.00333333
										0.82	3			0.82	1																				0.59		-0.00033333	0.0215	-0.00966667	-0.006	-0.0035			0.59		-0.0005	-0.00025	-0.0116667	-0.00333333
										0.83	1			0.83	0																				0.6		-0.00033333	-0.0035	0.057	-0.006	-0.0035			0.6		-0.0005	-0.00025	0.0216667	-0.00333333
										0.84	1			0.84	0																				0.61		-0.00033333	0.0215	-0.00966667	-0.006	-0.0035			0.61		-0.0005	-0.00025	0.0216667	-0.00333333
										0.85	1			0.85	2																				0.62		-0.00033333	-0.0035	0.057	-0.006	-0.0035			0.62		0.0328333	-0.00025	-0.0116667	-0.00333333
										0.86	1			0.86	0																				0.63		-0.00033333	-0.0035	-0.00966667	-0.006	-0.0035			0.63		-0.0005	-0.00025	-0.0116667	-0.00333333
										0.87	0			0.87	0																				0.64		-0.00033333	-0.0035	-0.00966667	-0.006	-0.0035			0.64		-0.0005	-0.00025	0.055	-0.00333333
										0.88	0			0.88	0																				0.65		-0.00033333	0.0215	-0.00966667	0.0273333	-0.0035			0.65		0.0328333	-0.00025	0.0883333	0.03
										0.89	0			0.89	0																				0.66		-0.00033333	0.0215	0.0236667	-0.006	-0.0035			0.66		-0.0005	-0.00025	-0.0116667	-0.00333333
										0.9	1			0.9	0																				0.67		-0.00033333	0.0715	0.0236667	-0.006	-0.0035			0.67		-0.0005	-0.00025	0.0216667	-0.00333333
										0.91	0			0.91	0																				0.68		-0.00033333	0.0215	-0.00966667	-0.006	-0.0035			0.68		0.0328333	-0.00025	0.0216667	-0.00333333
										0.92	0			0.92	0																				0.69		-0.00033333	-0.0035	-0.00966667	-0.006	-0.0035			0.69		-0.0005	-0.00025	0.0216667	-0.00333333
										0.93	0			0.93	1																				0.7		-0.00033333	-0.0035	0.0236667	-0.006	-0.0035			0.7		-0.0005	0.02475	-0.0116667	-0.00333333
										0.94	1			0.94	0																				0.71		-0.00033333	-0.0035	0.0236667	-0.006	-0.0035			0.71		-0.0005	-0.00025	-0.0116667	-0.00333333
										0.95	2			0.95	0																				0.72		-0.00033333	-0.0035	0.0236667	-0.006	-0.0035			0.72		-0.0005	-0.00025	-0.0116667	-0.00333333
										0.96	1			0.96	0																				0.73		-0.00033333	-0.0035	0.0236667	-0.006	-0.0035			0.73		-0.0005	-0.00025	-0.0116667	-0.00333333
										0.97	0			0.97	0																				0.74		-0.00033333	0.0215	0.057	-0.006	-0.0035			0.74		-0.0005	-0.00025	0.0216667	-0.00333333
										0.98	3			0.98	1																				0.75		-0.00033333	-0.0035	-0.00966667	-0.006	-0.0035			0.75		0.0328333	-0.00025	0.0216667	-0.00333333
										0.99	2			0.99	1																				0.76		-0.00033333	-0.0035	-0.00966667	-0.006	-0.0035			0.76		-0.0005	-0.00025	-0.0116667	-0.00333333
										1	1			1	1																				0.77		-0.00033333	-0.0035	-0.00966667	-0.006	-0.0035			0.77		0.0328333	-0.00025	0.0883333	-0.00333333
										1.01	0			1.01	1																				0.78		-0.00033333	-0.0035	0.057	-0.006	-0.0035			0.78		-0.0005	-0.00025	0.0216667	-0.00333333
										1.02	2			1.02	0																				0.79		-0.00033333	-0.0035	0.0236667	-0.006	-0.0035			0.79		-0.0005	-0.00025	-0.0116667	-0.00333333
										1.03	0			1.03	1																				0.8		-0.00033333	-0.0035	-0.00966667	-0.006	-0.0035			0.8		0.0328333	-0.00025	-0.0116667	-0.00333333
										1.04	3			1.04	0																				0.81		-0.00033333	-0.0035	-0.00966667	-0.006	-0.0035			0.81		-0.0005	-0.00025	-0.0116667	-0.00333333
										1.05	1			1.05	0																				0.82		-0.00033333	0.0215	-0.00966667	-0.006	-0.0035			0.82		-0.0005	-0.00025	0.0216667	-0.00333333
										1.06	2			1.06	1																				0.83		-0.00033333	-0.0035	0.057	-0.006	-0.0035			0.83		-0.0005	-0.00025	0.0216667	-0.00333333
										1.07	2			1.07	0																				0.84		-0.00033333	-0.0035	0.0236667	-0.006	-0.0035			0.84		-0.0005	-0.00025	0.055	-0.00333333
										1.08	1			1.08	0																				0.85		0.033	-0.0035	-0.00966667	-0.006	0.0215			0.85		-0.0005	-0.00025	-0.0116667	-0.00333333
										1.09	2			1.09	1																				0.86		0.033	-0.0035	-0.00966667	-0.006	-0.0035			0.86		-0.0005	-0.00025	-0.0116667	-0.00333333
										1.1	1			1.1	0																				0.87		-0.00033333	-0.0035	-0.00966667	-0.006	-0.0035			0.87		-0.0005	-0.00025	0.0883333	-0.00333333
										1.11	1			1.11	0																				0.88		-0.00033333	-0.0035	0.0236667	-0.006	0.0215			0.88		-0.0005	-0.00025	0.055	-0.00333333
										1.12	0			1.12	2																				0.89		-0.00033333	-0.0035	0.057	-0.006	-0.0035			0.89		-0.0005	-0.00025	0.055	-0.00333333
										1.13	2			1.13	0																				0.9		-0.00033333	-0.0035	-0.00966667	-0.006	-0.0035			0.9		-0.0005	-0.00025	0.055	-0.00333333
										1.14	2			1.14	0																				0.91		-0.00033333	-0.0035	-0.00966667	-0.006	-0.0035			0.91		-0.0005	-0.00025	-0.0116667	-0.00333333
										1.15	0			1.15	0																				0.92		-0.00033333	-0.0035	-0.00966667	-0.006	-0.0035			0.92		-0.0005	-0.00025	-0.0116667	-0.00333333
										1.16	1			1.16	1																				0.93		-0.00033333	-0.0035	0.0236667	-0.006	-0.0035			0.93		-0.0005	-0.00025	-0.0116667	-0.00333333
										1.17	3			1.17	1																				0.94		-0.00033333	-0.0035	0.0236667	-0.006	0.0215			0.94		0.0328333	-0.00025	-0.0116667	-0.00333333
										1.18	0			1.18	0																				0.95		-0.00033333	0.0215	-0.00966667	-0.006	-0.0035			0.95		-0.0005	-0.00025	-0.0116667	-0.00333333
										1.19	0			1.19	1																				0.96		-0.00033333	-0.0035	-0.00966667	-0.006	-0.0035			0.96		-0.0005	-0.00025	-0.0116667	-0.00333333
										1.2	1			1.2	1																				0.97		-0.00033333	-0.0035	0.0236667	-0.006	0.0215			0.97		-0.0005	-0.00025	-0.0116667	-0.00333333
										1.21	0			1.21	0																				0.98		-0.00033333	-0.0035	0.057	-0.006	-0.0035			0.98		-0.0005	-0.00025	-0.0116667	-0.00333333
										1.22	0			1.22	1																				0.99		-0.00033333	-0.0035	0.0236667	-0.006	-0.0035			0.99		-0.0005	-0.00025	-0.0116667	-0.00333333
										1.23	1			1.23	0																				1		-0.00033333	0.0215	0.0236667	-0.006	-0.0035			1		-0.0005	-0.00025	0.0216667	-0.00333333
										1.24	1			1.24	0																				1.01		-0.00033333	-0.0035	-0.00966667	-0.006	-0.0035			1.01		-0.0005	-0.00025	-0.0116667	-0.00333333
										1.25	1			1.25	0																				1.02		-0.00033333	-0.0035	0.0236667	-0.006	-0.0035			1.02		-0.0005	-0.00025	-0.0116667	-0.00333333
										1.26	2			1.26	0																				1.03		-0.00033333	-0.0035	0.0236667	-0.006	-0.0035			1.03		-0.0005	-0.00025	-0.0116667	-0.00333333
										1.27	3			1.27	0																				1.04		-0.00033333	-0.0035	-0.00966667	-0.006	-0.0035			1.04		-0.0005	-0.00025	0.0216667	-0.00333333
										1.28	3			1.28	1																				1.05		-0.00033333	-0.0035	0.0236667	-0.006	-0.0035			1.05		-0.0005	-0.00025	-0.0116667	-0.00333333
										1.29	0			1.29	0																				1.06		-0.00033333	-0.0035	-0.00966667	-0.006	-0.0035			1.06		-0.0005	-0.00025	0.0216667	-0.00333333
										1.3	0			1.3	0																				1.07		-0.00033333	-0.0035	-0.00966667	-0.006	-0.0035			1.07		-0.0005	-0.00025	-0.0116667	-0.00333333
										1.31	1			1.31	0																				1.08		-0.00033333	-0.0035	-0.00966667	-0.006	-0.0035			1.08		-0.0005	-0.00025	-0.0116667	-0.00333333
										1.32	0			1.32	0																				1.09		-0.00033333	-0.0035	-0.00966667	-0.006	-0.0035			1.09		0.0328333	-0.00025	0.0216667	-0.00333333
										1.33	0			1.33	1																				1.1		-0.00033333	-0.0035	0.057	-0.006	-0.0035			1.1		-0.0005	-0.00025	-0.0116667	-0.00333333
										1.34	1			1.34	1																				1.11		-0.00033333	-0.0035	-0.00966667	-0.006	-0.0035			1.11		-0.0005	-0.00025	-0.0116667	-0.00333333
										1.35	0			1.35	1																				1.12		-0.00033333	-0.0035	-0.00966667	-0.006	0.0215			1.12		-0.0005	-0.00025	-0.0116667	0.03
										1.36	2			1.36	2																				1.13		-0.00033333	-0.0035	0.057	-0.006	-0.0035			1.13		-0.0005	-0.00025	-0.0116667	-0.00333333
										1.37	0			1.37	1																				1.14		-0.00033333	-0.0035	-0.00966667	-0.006	-0.0035			1.14		-0.0005	-0.00025	-0.0116667	-0.00333333
										1.38	0			1.38	0																				1.15		-0.00033333	-0.0035	0.0236667	-0.006	-0.0035			1.15		-0.0005	-0.00025	0.0216667	-0.00333333
										1.39	0			1.39	0																				1.16		-0.00033333	-0.0035	-0.00966667	-0.006	-0.0035			1.16		-0.0005	-0.00025	0.0216667	-0.00333333
										1.4	1			1.4	1																				1.17		-0.00033333	-0.0035	-0.00966667	-0.006	-0.0035			1.17		-0.0005	-0.00025	-0.0116667	-0.00333333
										1.41	1			1.41	1																				1.18		-0.00033333	-0.0035	-0.00966667	-0.006	-0.0035			1.18		-0.0005	-0.00025	-0.0116667	-0.00333333
										1.42	1			1.42	1																				1.19		-0.00033333	-0.0035	0.0236667	-0.006	-0.0035			1.19		-0.0005	-0.00025	-0.0116667	-0.00333333
										1.43	0			1.43	1																				1.2		-0.00033333	-0.0035	0.0236667	-0.006	-0.0035			1.2		-0.0005	-0.00025	-0.0116667	-0.00333333
										1.44	0			1.44	1																				1.21		0.033	0.0215	-0.00966667	-0.006	-0.0035			1.21		-0.0005	-0.00025	-0.0116667	-0.00333333
										1.45	2			1.45	0																				1.22		-0.00033333	-0.0035	0.0236667	-0.006	-0.0035			1.22		-0.0005	-0.00025	0.055	-0.00333333
										1.46	0			1.46	0																				1.23		-0.00033333	-0.0035	0.0236667	-0.006	-0.0035			1.23		-0.0005	-0.00025	-0.0116667	-0.00333333
										1.47	0			1.47	1																				1.24		-0.00033333	-0.0035	0.0236667	-0.006	-0.0035			1.24		-0.0005	-0.00025	-0.0116667	-0.00333333
										1.48	1			1.48	1																				1.25		-0.00033333	-0.0035	0.057	-0.006	-0.0035			1.25		-0.0005	-0.00025	-0.0116667	-0.00333333
										1.49	0			1.49	0																				1.26		-0.00033333	0.0215	0.0236667	-0.006	-0.0035			1.26		-0.0005	-0.00025	-0.0116667	0.03
										1.5	2			1.5	0																				1.27		-0.00033333	0.0215	-0.00966667	-0.006	-0.0035			1.27		-0.0005	-0.00025	-0.0116667	-0.00333333
										1.51	2			1.51	1																				1.28		-0.00033333	-0.0035	-0.00966667	-0.006	0.0215			1.28		-0.0005	-0.00025	-0.0116667	-0.00333333
										1.52	2			1.52	0																				1.29		-0.00033333	-0.0035	-0.00966667	-0.006	-0.0035			1.29		-0.0005	-0.00025	-0.0116667	-0.00333333
										1.53	3			1.53	0																				1.3		-0.00033333	-0.0035	-0.00966667	-0.006	-0.0035			1.3		-0.0005	-0.00025	0.0216667	-0.00333333
										1.54	0			1.54	0																				1.31		-0.00033333	-0.0035	0.0236667	-0.006	-0.0035			1.31		-0.0005	-0.00025	-0.0116667	-0.00333333
										1.55	1			1.55	0																				1.32		-0.00033333	-0.0035	0.0236667	-0.006	-0.0035			1.32		-0.0005	-0.00025	0.0216667	-0.00333333
										1.56	2			1.56	1																				1.33		-0.00033333	-0.0035	-0.00966667	-0.006	-0.0035			1.33		-0.0005	-0.00025	-0.0116667	-0.00333333
										1.57	0			1.57	1																				1.34		-0.00033333	-0.0035	-0.00966667	-0.006	0.0215			1.34		-0.0005	-0.00025	0.0216667	-0.00333333
										1.58	0			1.58	0																				1.35		-0.00033333	0.0215	-0.00966667	-0.006	-0.0035			1.35		-0.0005	-0.00025	-0.0116667	-0.00333333
										1.59	2			1.59	1																				1.36		-0.00033333	-0.0035	0.057	-0.006	0.0465			1.36		-0.0005	-0.00025	0.0216667	-0.00333333
										1.6	1			1.6	0																				1.37		-0.00033333	-0.0035	0.0236667	-0.006	0.0215			1.37		-0.0005	-0.00025	0.0216667	-0.00333333
										1.61	0			1.61	0																				1.38		-0.00033333	-0.0035	-0.00966667	0.0273333	-0.0035			1.38		-0.0005	-0.00025	-0.0116667	-0.00333333
										1.62	0			1.62	1																				1.39		-0.00033333	-0.0035	-0.00966667	0.0273333	-0.0035			1.39		-0.0005	-0.00025	-0.0116667	0.03
										1.63	1			1.63	0																				1.4		-0.00033333	-0.0035	-0.00966667	-0.006	-0.0035			1.4		-0.0005	-0.00025	-0.0116667	0.0633333
										1.64	1			1.64	0																				1.41		-0.00033333	-0.0035	0.0236667	-0.006	-0.0035			1.41		-0.0005	-0.00025	0.0216667	-0.00333333
										1.65	0			1.65	0																				1.42		-0.00033333	-0.0035	-0.00966667	0.0273333	-0.0035			1.42		-0.0005	-0.00025	-0.0116667	-0.00333333
										1.66	0			1.66	1																				1.43		-0.00033333	-0.0035	-0.00966667	-0.006	-0.0035			1.43		-0.0005	-0.00025	-0.0116667	-0.00333333
										1.67	0			1.67	1																				1.44		-0.00033333	-0.0035	-0.00966667	-0.006	-0.0035			1.44		-0.0005	-0.00025	-0.0116667	-0.00333333
										1.68	1			1.68	0																				1.45		-0.00033333	-0.0035	-0.00966667	-0.006	-0.0035			1.45		-0.0005	-0.00025	-0.0116667	-0.00333333
										1.69	2			1.69	0																				1.46		-0.00033333	-0.0035	0.0236667	-0.006	-0.0035			1.46		-0.0005	-0.00025	0.0216667	-0.00333333
										1.7	0			1.7	0																				1.47		-0.00033333	-0.0035	0.0236667	-0.006	-0.0035			1.47		-0.0005	-0.00025	-0.0116667	-0.00333333
										1.71	1			1.71	1																				1.48		-0.00033333	-0.0035	-0.00966667	-0.006	-0.0035			1.48		-0.0005	-0.00025	-0.0116667	-0.00333333
										1.72	4			1.72	2																				1.49		-0.00033333	-0.0035	-0.00966667	-0.006	-0.0035			1.49		-0.0005	-0.00025	-0.0116667	-0.00333333
										1.73	2			1.73	1																				1.5		-0.00033333	-0.0035	0.0236667	-0.006	0.0215			1.5		-0.0005	-0.00025	-0.0116667	-0.00333333
										1.74	0			1.74	0																				1.51		-0.00033333	-0.0035	-0.00966667	-0.006	-0.0035			1.51		-0.0005	-0.00025	-0.0116667	-0.00333333
										1.75	1			1.75	0																				1.52		-0.00033333	-0.0035	-0.00966667	-0.006	-0.0035			1.52		-0.0005	-0.00025	-0.0116667	-0.00333333
										1.76	1			1.76	0																				1.53		-0.00033333	-0.0035	-0.00966667	-0.006	-0.0035			1.53		-0.0005	-0.00025	-0.0116667	-0.00333333
										1.77	0			1.77	0																				1.54		-0.00033333	-0.0035	0.0236667	-0.006	-0.0035			1.54		-0.0005	-0.00025	0.0216667	-0.00333333
										1.78	2			1.78	2																				1.55		-0.00033333	-0.0035	0.057	-0.006	-0.0035			1.55		-0.0005	-0.00025	-0.0116667	-0.00333333
										1.79	2			1.79	0																				1.56		-0.00033333	-0.0035	-0.00966667	-0.006	-0.0035			1.56		-0.0005	-0.00025	-0.0116667	-0.00333333
										1.8	1			1.8	0																				1.57		-0.00033333	-0.0035	-0.00966667	-0.006	-0.0035			1.57		-0.0005	-0.00025	-0.0116667	-0.00333333
										1.81	2			1.81	0																				1.58		-0.00033333	-0.0035	-0.00966667	-0.006	-0.0035			1.58		-0.0005	-0.00025	0.0216667	0.03
										1.82	0			1.82	1																				1.59		-0.00033333	-0.0035	-0.00966667	-0.006	0.0215			1.59		-0.0005	-0.00025	-0.0116667	-0.00333333
										1.83	1			1.83	0																				1.6		-0.00033333	-0.0035	0.057	-0.006	-0.0035			1.6		-0.0005	-0.00025	0.0216667	-0.00333333
										1.84	4			1.84	0																				1.61		-0.00033333	-0.0035	0.0236667	-0.006	-0.0035			1.61		-0.0005	-0.00025	-0.0116667	-0.00333333
										1.85	1			1.85	0																				1.62		-0.00033333	-0.0035	0.0236667	-0.006	-0.0035			1.62		-0.0005	-0.00025	-0.0116667	-0.00333333
										1.86	1			1.86	0																				1.63		-0.00033333	-0.0035	-0.00966667	-0.006	-0.0035			1.63		-0.0005	-0.00025	-0.0116667	-0.00333333
										1.87	0			1.87	0																				1.64		-0.00033333	-0.0035	-0.00966667	-0.006	-0.0035			1.64		-0.0005	-0.00025	-0.0116667	-0.00333333
										1.88	1			1.88	1																				1.65		-0.00033333	-0.0035	-0.00966667	-0.006	-0.0035			1.65		-0.0005	-0.00025	-0.0116667	-0.00333333
										1.89	0			1.89	0																				1.66		-0.00033333	-0.0035	-0.00966667	-0.006	-0.0035			1.66		-0.0005	-0.00025	-0.0116667	-0.00333333
										1.9	3			1.9	0																				1.67		-0.00033333	-0.0035	-0.00966667	-0.006	-0.0035			1.67		-0.0005	-0.00025	-0.0116667	-0.00333333
										1.91	2			1.91	0																				1.68		-0.00033333	-0.0035	-0.00966667	-0.006	-0.0035			1.68		-0.0005	-0.00025	-0.0116667	-0.00333333
										1.92	2			1.92	1																				1.69		-0.00033333	-0.0035	-0.00966667	-0.006	0.0215			1.69		-0.0005	-0.00025	-0.0116667	-0.00333333
										1.93	0			1.93	1																				1.7		-0.00033333	-0.0035	-0.00966667	-0.006	-0.0035			1.7		-0.0005	-0.00025	0.0216667	-0.00333333
										1.94	2			1.94	1																				1.71		-0.00033333	-0.0035	0.0903333	-0.006	-0.0035			1.71		-0.0005	-0.00025	-0.0116667	-0.00333333
										1.95	0			1.95	1																				1.72		-0.00033333	-0.0035	-0.00966667	-0.006	-0.0035			1.72		-0.0005	-0.00025	-0.0116667	-0.00333333
										1.96	1			1.96	0																				1.73		-0.00033333	-0.0035	-0.00966667	-0.006	0.0215			1.73		-0.0005	-0.00025	-0.0116667	-0.00333333
										1.97	0			1.97	0																				1.74		-0.00033333	-0.0035	-0.00966667	-0.006	-0.0035			1.74		-0.0005	-0.00025	-0.0116667	-0.00333333
										1.98	1			1.98	0																				1.75		-0.00033333	-0.0035	-0.00966667	-0.006	-0.0035			1.75		-0.0005	-0.00025	-0.0116667	0.03
										1.99	2			1.99	0																				1.76		-0.00033333	-0.0035	-0.00966667	-0.006	-0.0035			1.76		-0.0005	-0.00025	-0.0116667	-0.00333333
										2	1			2	1																				1.77		-0.00033333	-0.0035	0.057	-0.006	-0.0035			1.77		-0.0005	-0.00025	-0.0116667	-0.00333333
										2.01	0			2.01	0																				1.78		-0.00033333	-0.0035	-0.00966667	-0.006	-0.0035			1.78		-0.0005	-0.00025	-0.0116667	-0.00333333
										2.02	0			2.02	1																				1.79		-0.00033333	-0.0035	-0.00966667	-0.006	-0.0035			1.79		-0.0005	-0.00025	-0.0116667	-0.00333333
										2.03	0			2.03	0																				1.8		-0.00033333	-0.0035	0.0236667	-0.006	-0.0035			1.8		-0.0005	-0.00025	-0.0116667	0.03
										2.04	0			2.04	0																				1.81		-0.00033333	-0.0035	-0.00966667	-0.006	-0.0035			1.81		-0.0005	-0.00025	-0.0116667	-0.00333333
										2.05	2			2.05	1																				1.82		-0.00033333	-0.0035	-0.00966667	-0.006	-0.0035			1.82		-0.0005	-0.00025	-0.0116667	-0.00333333
										2.06	1			2.06	0																				1.83		-0.00033333	-0.0035	-0.00966667	-0.006	-0.0035			1.83		-0.0005	-0.00025	-0.0116667	-0.00333333
										2.07	0			2.07	0																				1.84		-0.00033333	-0.0035	0.0236667	-0.006	-0.0035			1.84		-0.0005	-0.00025	-0.0116667	-0.00333333
										2.08	2			2.08	0																				1.85		-0.00033333	-0.0035	0.057	-0.006	-0.0035			1.85		-0.0005	-0.00025	-0.0116667	-0.00333333
										2.09	1			2.09	2																				1.86		-0.00033333	-0.0035	-0.00966667	-0.006	-0.0035			1.86		-0.0005	-0.00025	-0.0116667	-0.00333333
										2.1	0			2.1	0																				1.87		-0.00033333	-0.0035	-0.00966667	0.0273333	-0.0035			1.87		-0.0005	-0.00025	-0.0116667	-0.00333333
										2.11	0			2.11	0																				1.88		-0.00033333	-0.0035	-0.00966667	-0.006	-0.0035			1.88		-0.0005	-0.00025	-0.0116667	-0.00333333
										2.12	1			2.12	2																				1.89		0.033	-0.0035	-0.00966667	-0.006	-0.0035			1.89		-0.0005	-0.00025	-0.0116667	-0.00333333
										2.13	0			2.13	1																				1.9		-0.00033333	-0.0035	-0.00966667	-0.006	-0.0035			1.9		-0.0005	-0.00025	-0.0116667	-0.00333333
										2.14	1			2.14	0																				1.91		-0.00033333	-0.0035	-0.00966667	-0.006	0.0215			1.91		-0.0005	-0.00025	-0.0116667	-0.00333333
										2.15	1			2.15	0																				1.92		-0.00033333	-0.0035	-0.00966667	-0.006	-0.0035			1.92		-0.0005	-0.00025	0.0216667	-0.00333333
										2.16	2			2.16	0																				1.93		-0.00033333	0.0215	-0.00966667	-0.006	-0.0035			1.93		-0.0005	-0.00025	-0.0116667	-0.00333333
										2.17	3			2.17	0																				1.94		0.033	-0.0035	-0.00966667	-0.006	-0.0035			1.94		-0.0005	-0.00025	-0.0116667	-0.00333333
										2.18	2			2.18	1																				1.95		-0.00033333	-0.0035	0.0236667	-0.006	-0.0035			1.95		-0.0005	-0.00025	-0.0116667	-0.00333333
										2.19	4			2.19	0																				1.96		-0.00033333	-0.0035	-0.00966667	-0.006	-0.0035			1.96		-0.0005	-0.00025	-0.0116667	-0.00333333
										2.2	1			2.2	0																				1.97		-0.00033333	-0.0035	0.0236667	-0.006	-0.0035			1.97		-0.0005	-0.00025	-0.0116667	-0.00333333
										2.21	0			2.21	1																				1.98		-0.00033333	-0.0035	-0.00966667	-0.006	-0.0035			1.98		-0.0005	-0.00025	-0.0116667	-0.00333333
										2.22	1			2.22	0																				1.99		-0.00033333	-0.0035	0.0236667	-0.006	-0.0035			1.99		-0.0005	-0.00025	-0.0116667	-0.00333333
										2.23	2			2.23	0																				2		-0.00033333	-0.0035	-0.00966667	-0.006	-0.0035			2		-0.0005	-0.00025	-0.0116667	-0.00333333
										2.24	0			2.24	2																				2.01		-0.00033333	-0.0035	-0.00966667	-0.006	-0.0035			2.01		-0.0005	-0.00025	-0.0116667	-0.00333333
										2.25	0			2.25	0																				2.02		-0.00033333	-0.0035	0.0236667	-0.006	-0.0035			2.02		-0.0005	-0.00025	-0.0116667	-0.00333333
										2.26	0			2.26	1																				2.03		-0.00033333	-0.0035	0.0236667	-0.006	-0.0035			2.03		-0.0005	-0.00025	-0.0116667	-0.00333333
										2.27	0			2.27	0																				2.04		-0.00033333	0.0215	-0.00966667	0.0273333	-0.0035			2.04		-0.0005	-0.00025	-0.0116667	0.03
										2.28	1			2.28	0																				2.05		-0.00033333	-0.0035	-0.00966667	-0.006	-0.0035			2.05		-0.0005	-0.00025	0.0216667	-0.00333333
										2.29	0			2.29	0																				2.06		0.033	-0.0035	-0.00966667	-0.006	-0.0035			2.06		-0.0005	-0.00025	-0.0116667	-0.00333333
										2.3	0			2.3	0																				2.07		-0.00033333	-0.0035	0.0236667	-0.006	-0.0035			2.07		-0.0005	-0.00025	-0.0116667	-0.00333333
										2.31	1			2.31	1																				2.08		-0.00033333	-0.0035	-0.00966667	-0.006	-0.0035			2.08		-0.0005	-0.00025	-0.0116667	-0.00333333
										2.32	2			2.32	0																				2.09		-0.00033333	-0.0035	-0.00966667	-0.006	-0.0035			2.09		-0.0005	-0.00025	-0.0116667	-0.00333333
										2.33	1			2.33	0																				2.1		-0.00033333	-0.0035	-0.00966667	-0.006	-0.0035			2.1		-0.0005	-0.00025	-0.0116667	-0.00333333
										2.34	1			2.34	0																				2.11		-0.00033333	-0.0035	0.0236667	-0.006	-0.0035			2.11		-0.0005	-0.00025	-0.0116667	-0.00333333
										2.35	1			2.35	3																				2.12		-0.00033333	-0.0035	0.0236667	-0.006	-0.0035			2.12		0.0328333	-0.00025	-0.0116667	-0.00333333
										2.36	1			2.36	0																				2.13		-0.00033333	-0.0035	0.0236667	-0.006	-0.0035			2.13		-0.0005	0.02475	-0.0116667	-0.00333333
										2.37	3			2.37	0																				2.14		-0.00033333	-0.0035	-0.00966667	-0.006	-0.0035			2.14		-0.0005	-0.00025	-0.0116667	-0.00333333
										2.38	0			2.38	0																				2.15		-0.00033333	-0.0035	-0.00966667	-0.006	-0.0035			2.15		-0.0005	-0.00025	-0.0116667	-0.00333333
										2.39	2			2.39	1																				2.16		-0.00033333	-0.0035	-0.00966667	-0.006	-0.0035			2.16		-0.0005	-0.00025	-0.0116667	-0.00333333
										2.4	2			2.4	1																				2.17		-0.00033333	-0.0035	0.0236667	-0.006	-0.0035			2.17		-0.0005	-0.00025	-0.0116667	-0.00333333
										2.41	2			2.41	1																				2.18		-0.00033333	-0.0035	-0.00966667	-0.006	-0.0035			2.18		-0.0005	-0.00025	-0.0116667	-0.00333333
										2.42	1			2.42	0																				2.19		-0.00033333	-0.0035	-0.00966667	-0.006	0.0215			2.19		-0.0005	-0.00025	0.0216667	-0.00333333
										2.43	0			2.43	0																				2.2		-0.00033333	-0.0035	-0.00966667	-0.006	-0.0035			2.2		-0.0005	-0.00025	-0.0116667	-0.00333333
										2.44	0			2.44	0																				2.21		-0.00033333	-0.0035	-0.00966667	-0.006	-0.0035			2.21		-0.0005	-0.00025	-0.0116667	-0.00333333
										2.45	0			2.45	1																				2.22		-0.00033333	-0.0035	-0.00966667	-0.006	-0.0035			2.22		-0.0005	-0.00025	-0.0116667	-0.00333333
										2.46	0			2.46	0																				2.23		-0.00033333	-0.0035	-0.00966667	-0.006	-0.0035			2.23		-0.0005	-0.00025	-0.0116667	-0.00333333
										2.47	0			2.47	0																				2.24		-0.00033333	-0.0035	-0.00966667	-0.006	-0.0035			2.24		-0.0005	-0.00025	-0.0116667	-0.00333333
										2.48	3			2.48	0																				2.25		-0.00033333	-0.0035	0.057	-0.006	-0.0035			2.25		-0.0005	-0.00025	-0.0116667	-0.00333333
										2.49	1			2.49	0																				2.26		-0.00033333	-0.0035	-0.00966667	-0.006	-0.0035			2.26		-0.0005	-0.00025	-0.0116667	-0.00333333
										2.5	0			2.5	0																				2.27		-0.00033333	-0.0035	-0.00966667	-0.006	-0.0035			2.27		-0.0005	-0.00025	-0.0116667	-0.00333333
										2.51	2			2.51	0																				2.28		-0.00033333	-0.0035	-0.00966667	-0.006	-0.0035			2.28		-0.0005	-0.00025	0.0216667	-0.00333333
										2.52	2			2.52	0																				2.29		-0.00033333	-0.0035	-0.00966667	-0.006	-0.0035			2.29		-0.0005	-0.00025	-0.0116667	-0.00333333
										2.53	1			2.53	1																				2.3		-0.00033333	-0.0035	-0.00966667	-0.006	-0.0035			2.3		-0.0005	-0.00025	-0.0116667	0.03
										2.54	1			2.54	1																				2.31		-0.00033333	-0.0035	-0.00966667	-0.006	-0.0035			2.31		-0.0005	-0.00025	-0.0116667	0.03
										2.55	2			2.55	0																				2.32		0.033	-0.0035	-0.00966667	-0.006	-0.0035			2.32		-0.0005	-0.00025	0.0216667	-0.00333333
										2.56	1			2.56	1																				2.33		-0.00033333	-0.0035	0.0236667	-0.006	-0.0035			2.33		-0.0005	-0.00025	-0.0116667	-0.00333333
										2.57	1			2.57	2																				2.34		-0.00033333	-0.0035	-0.00966667	-0.006	-0.0035			2.34		-0.0005	-0.00025	-0.0116667	-0.00333333
										2.58	3			2.58	0																				2.35		-0.00033333	0.0215	-0.00966667	-0.006	-0.0035			2.35		-0.0005	-0.00025	-0.0116667	-0.00333333
										2.59	1			2.59	0																				2.36		-0.00033333	-0.0035	-0.00966667	-0.006	0.0215			2.36		0.0328333	-0.00025	-0.0116667	-0.00333333
										2.6	0			2.6	0																				2.37		-0.00033333	-0.0035	-0.00966667	-0.006	-0.0035			2.37		-0.0005	-0.00025	-0.0116667	-0.00333333
										2.61	1			2.61	1																				2.38		-0.00033333	-0.0035	-0.00966667	-0.006	-0.0035			2.38		-0.0005	-0.00025	-0.0116667	-0.00333333
										2.62	1			2.62	2																				2.39		-0.00033333	0.0215	-0.00966667	-0.006	0.0715			2.39		-0.0005	-0.00025	-0.0116667	-0.00333333
										2.63	0			2.63	1																				2.4		-0.00033333	-0.0035	-0.00966667	-0.006	-0.0035			2.4		-0.0005	-0.00025	-0.0116667	-0.00333333
										2.64	2			2.64	0																				2.41		-0.00033333	-0.0035	-0.00966667	-0.006	-0.0035			2.41		-0.0005	-0.00025	0.0216667	-0.00333333
										2.65	2			2.65	0																				2.42		-0.00033333	-0.0035	0.057	-0.006	-0.0035			2.42		-0.0005	-0.00025	-0.0116667	0.03
										2.66	0			2.66	0																				2.43		-0.00033333	-0.0035	-0.00966667	-0.006	-0.0035			2.43		-0.0005	-0.00025	-0.0116667	0.03
										2.67	1			2.67	1																				2.44		-0.00033333	0.0215	-0.00966667	-0.006	-0.0035			2.44		-0.0005	-0.00025	-0.0116667	0.03
										2.68	1			2.68	0																				2.45		-0.00033333	-0.0035	-0.00966667	-0.006	-0.0035			2.45		-0.0005	-0.00025	0.0216667	-0.00333333
										2.69	2			2.69	0																				2.46		-0.00033333	-0.0035	-0.00966667	-0.006	-0.0035			2.46		-0.0005	-0.00025	-0.0116667	0.03
										2.7	0			2.7	1																				2.47		-0.00033333	-0.0035	-0.00966667	-0.006	-0.0035			2.47		-0.0005	-0.00025	-0.0116667	-0.00333333
										2.71	2			2.71	0																				2.48		-0.00033333	-0.0035	-0.00966667	-0.006	-0.0035			2.48		-0.0005	-0.00025	-0.0116667	-0.00333333
										2.72	1			2.72	0																				2.49		-0.00033333	-0.0035	-0.00966667	-0.006	-0.0035			2.49		-0.0005	-0.00025	-0.0116667	-0.00333333
										2.73	1			2.73	0																				2.5		-0.00033333	0.0215	-0.00966667	-0.006	-0.0035			2.5		-0.0005	-0.00025	-0.0116667	-0.00333333
										2.74	2			2.74	0																				2.51		-0.00033333	-0.0035	-0.00966667	-0.006	-0.0035			2.51		-0.0005	-0.00025	0.0216667	-0.00333333
										2.75	1			2.75	0																				2.52		-0.00033333	-0.0035	-0.00966667	-0.006	-0.0035			2.52		-0.0005	-0.00025	-0.0116667	-0.00333333
										2.76	0			2.76	0																				2.53		-0.00033333	-0.0035	-0.00966667	-0.006	-0.0035			2.53		-0.0005	-0.00025	0.0216667	-0.00333333
										2.77	0			2.77	0																				2.54		-0.00033333	-0.0035	-0.00966667	-0.006	-0.0035			2.54		-0.0005	-0.00025	-0.0116667	-0.00333333
										2.78	1			2.78	1																				2.55		-0.00033333	-0.0035	-0.00966667	-0.006	-0.0035			2.55		-0.0005	-0.00025	0.0216667	-0.00333333
										2.79	0			2.79	0																				2.56		-0.00033333	0.0215	-0.00966667	-0.006	-0.0035			2.56		-0.0005	-0.00025	0.0216667	-0.00333333
										2.8	0			2.8	2																				2.57		-0.00033333	-0.0035	-0.00966667	-0.006	-0.0035			2.57		-0.0005	-0.00025	-0.0116667	-0.00333333
										2.81	1			2.81	2																				2.58		-0.00033333	-0.0035	-0.00966667	-0.006	-0.0035			2.58		-0.0005	-0.00025	0.0216667	-0.00333333
										2.82	0			2.82	0																				2.59		-0.00033333	-0.0035	0.0236667	-0.006	0.0215			2.59		-0.0005	-0.00025	-0.0116667	-0.00333333
										2.83	0			2.83	0																				2.6		-0.00033333	-0.0035	0.0236667	-0.006	-0.0035			2.6		-0.0005	-0.00025	-0.0116667	-0.00333333
										2.84	2			2.84	0																				2.61		-0.00033333	-0.0035	-0.00966667	-0.006	-0.0035			2.61		-0.0005	-0.00025	-0.0116667	-0.00333333
										2.85	1			2.85	1																				2.62		-0.00033333	-0.0035	-0.00966667	-0.006	-0.0035			2.62		-0.0005	-0.00025	-0.0116667	-0.00333333
										2.86	1			2.86	1																				2.63		-0.00033333	-0.0035	-0.00966667	-0.006	0.0215			2.63		-0.0005	-0.00025	0.0216667	-0.00333333
										2.87	0			2.87	0																				2.64		-0.00033333	0.0215	-0.00966667	-0.006	-0.0035			2.64		-0.0005	-0.00025	-0.0116667	-0.00333333
										2.88	4			2.88	2																				2.65		-0.00033333	0.0215	-0.00966667	-0.006	-0.0035			2.65		-0.0005	-0.00025	-0.0116667	-0.00333333
										2.89	0			2.89	0																				2.66		-0.00033333	-0.0035	-0.00966667	-0.006	-0.0035			2.66		-0.0005	-0.00025	0.0216667	-0.00333333
										2.9	1			2.9	0																				2.67		-0.00033333	-0.0035	0.0236667	-0.006	-0.0035			2.67		-0.0005	-0.00025	0.055	-0.00333333
										2.91	3			2.91	1																				2.68		-0.00033333	-0.0035	-0.00966667	-0.006	-0.0035			2.68		-0.0005	-0.00025	-0.0116667	-0.00333333
										2.92	1			2.92	0																				2.69		-0.00033333	-0.0035	-0.00966667	-0.006	-0.0035			2.69		-0.0005	-0.00025	-0.0116667	-0.00333333
										2.93	0			2.93	1																				2.7		-0.00033333	-0.0035	0.0236667	-0.006	-0.0035			2.7		-0.0005	-0.00025	-0.0116667	-0.00333333
										2.94	2			2.94	0																				2.71		-0.00033333	-0.0035	-0.00966667	-0.006	-0.0035			2.71		-0.0005	-0.00025	-0.0116667	-0.00333333
										2.95	0			2.95	1																				2.72		-0.00033333	-0.0035	0.0236667	-0.006	-0.0035			2.72		-0.0005	-0.00025	0.0216667	-0.00333333
										2.96	1			2.96	0																				2.73		-0.00033333	-0.0035	0.057	-0.006	-0.0035			2.73		-0.0005	-0.00025	-0.0116667	-0.00333333
										2.97	1			2.97	0																				2.74		-0.00033333	-0.0035	-0.00966667	-0.006	-0.0035			2.74		-0.0005	-0.00025	0.055	-0.00333333
										2.98	0			2.98	1																				2.75		-0.00033333	0.0215	-0.00966667	-0.006	-0.0035			2.75		-0.0005	-0.00025	-0.0116667	-0.00333333
										2.99	0			2.99	0																				2.76		-0.00033333	-0.0035	-0.00966667	-0.006	-0.0035			2.76		-0.0005	-0.00025	-0.0116667	-0.00333333
																																			2.77		-0.00033333	-0.0035	-0.00966667	-0.006	-0.0035			2.77		-0.0005	-0.00025	-0.0116667	-0.00333333
																																			2.78		-0.00033333	-0.0035	0.0236667	-0.006	-0.0035			2.78		-0.0005	-0.00025	-0.0116667	-0.00333333
																																			2.79		-0.00033333	-0.0035	-0.00966667	-0.006	-0.0035			2.79		-0.0005	-0.00025	-0.0116667	0.03
																																			2.8		-0.00033333	-0.0035	-0.00966667	-0.006	-0.0035			2.8		-0.0005	-0.00025	-0.0116667	-0.00333333
																																			2.81		-0.00033333	-0.0035	0.0236667	-0.006	-0.0035			2.81		-0.0005	-0.00025	0.0216667	-0.00333333
																																			2.82		-0.00033333	-0.0035	-0.00966667	-0.006	-0.0035			2.82		-0.0005	-0.00025	0.0216667	-0.00333333
																																			2.83		-0.00033333	-0.0035	-0.00966667	-0.006	-0.0035			2.83		-0.0005	-0.00025	-0.0116667	-0.00333333
																																			2.84		-0.00033333	-0.0035	0.0236667	-0.006	-0.0035			2.84		-0.0005	-0.00025	-0.0116667	-0.00333333
																																			2.85		-0.00033333	-0.0035	-0.00966667	-0.006	-0.0035			2.85		-0.0005	-0.00025	0.0216667	-0.00333333
																																			2.86		-0.00033333	-0.0035	0.0236667	-0.006	-0.0035			2.86		-0.0005	-0.00025	-0.0116667	-0.00333333
																																			2.87		-0.00033333	0.0215	0.0236667	-0.006	-0.0035			2.87		-0.0005	-0.00025	-0.0116667	-0.00333333
																																			2.88		-0.00033333	-0.0035	-0.00966667	-0.006	-0.0035			2.88		-0.0005	-0.00025	-0.0116667	-0.00333333
																																			2.89		-0.00033333	-0.0035	-0.00966667	-0.006	-0.0035			2.89		-0.0005	-0.00025	-0.0116667	-0.00333333
																																			2.9		-0.00033333	-0.0035	0.0236667	-0.006	-0.0035			2.9		-0.0005	-0.00025	-0.0116667	-0.00333333
																																			2.91		-0.00033333	-0.0035	-0.00966667	-0.006	-0.0035			2.91		-0.0005	-0.00025	-0.0116667	-0.00333333
																																			2.92		-0.00033333	-0.0035	-0.00966667	-0.006	-0.0035			2.92		-0.0005	-0.00025	0.0216667	-0.00333333
																																			2.93		-0.00033333	-0.0035	-0.00966667	-0.006	-0.0035			2.93		-0.0005	-0.00025	-0.0116667	-0.00333333
																																			2.94		-0.00033333	-0.0035	-0.00966667	-0.006	-0.0035			2.94		-0.0005	-0.00025	0.0216667	-0.00333333
																																			2.95		-0.00033333	-0.0035	-0.00966667	0.0273333	-0.0035			2.95		-0.0005	-0.00025	-0.0116667	-0.00333333
																																			2.96		-0.00033333	-0.0035	-0.00966667	-0.006	-0.0035			2.96		-0.0005	-0.00025	-0.0116667	-0.00333333
																																			2.97		-0.00033333	-0.0035	-0.00966667	-0.006	-0.0035			2.97		-0.0005	-0.00025	0.0216667	-0.00333333
																																			2.98		-0.00033333	-0.0035	0.0236667	-0.006	-0.0035			2.98		-0.0005	-0.00025	-0.0116667	-0.00333333
																																			2.99		-0.00033333	-0.0035	-0.00966667	-0.006	-0.0035			2.99		-0.0005	-0.00025	-0.0116667	-0.00333333
[truncated: 4 more columns]
