# Supplementary material for: Aversive stimuli drive hypothalamus-to-habenula excitation to promote escape behavior
Source: eLife. 2017 Sep 5;6:e30697. doi: 10.7554/eLife.30697 (PMC5606847; doi:10.7554/eLife.30697)
Supplement: Figure 2—source data 1. [file elife-30697-fig2-data1.xlsx]

## Sheet: Figure 2
Figure 2 a								Figure 2 b
Currents (pA) evoked by mVTA terminals optical stimulation (-50mV)								Current (pA) evoked by LH terminals optical stimulation (-50mV)
	ACSF	#+NBQX	#+PTX							ACSF	#+NBQX	#+PTX
cells n									cells n
1	-100.41	-1.4537							1	-204.5	5.632	1.8144
2	-39.144	11.502	-0.99321						2	-66.318	0.8769	-0.17148
3	-298.49	-2.5315							3	-457.29	-0.31072	-0.6159
4	-32.079	-1.7589							4	-131.91	-10.176
5	-18.6	2.1885	-0.4766						5	-225.9	-17.662
6	-32.175	2.1567	0.21437						6	-209.58	2.31	1.778
7	-76.141	55.609							7	-27.879	3.0314	0.2238
8	-219.85	-1.5288							8	-715.26	1.8078	0.70917
9	-87.37	0.5388							9	-41.571	1.9415	0.14242
10	-20.517	20.019	0.27611
11	-140.55	-27.797
Figure 2 c																															Figure 2 d
Chemogenetic inhibition of mVTA terminals and Fs responses																															Chemogenetic inhibition ofLH terminals and Fs responses
Normalized PSTHs, BeforeCNO local infusion											Normalized PSTHs, After CNO local infusion											Firing rate, shock - baseline, Hz Before and After CNO local infusion									Normalized PSTHs, BeforeCNO local infusion												Normalized PSTHs, After CNO local infusion
mouse n		1	2	3	4	5	6	7			mouse n		1	2	3	4	5	6	7				Before		After						mouse n		1	2	3	4	5	6	7				mouse n		1	2	3	4	5
time, bin 10 ms											time, bin 10 ms											cells n									time, bin 10 ms												time, bin 10 ms		0.016	-0.0158333	-0.08975	0.152333	-0.011
-2		0.045	-0.0045	-0.005	0.0675	-0.0455	-0.0301667	-0.00383333			-2		0.0605	-0.0244	0.0126667	-0.0295	-0.014	-0.0533333	-0.00283333			1	9		29.3						-2		-0.0568333	-0.0218333	-0.038	0.124	0.0866667	-0.013	-0.0134783				-2		-0.0506667	0.0175	-0.03975	-0.081	0.0223333
-1.99		-0.0216667	0.0155	-0.0383333	0.00083333	-0.0455	-0.0301667	0.0295			-1.99		0.0271667	-0.0044	0.0126667	-0.0295	0.0193333	0.113333	-0.00283333			2	6.1		4.1						-1.99		-0.0568333	0.0448333	0.062	-0.00933333	0.02	0.0203333	-0.0134783				-1.99		-0.0173333	0.0175	0.26025	-0.0143333	-0.011
-1.98		0.045	-0.0045	0.0283333	0.0341667	-0.0455	-0.0301667	-0.00383333			-1.98		0.0271667	0.0356	-0.0206667	0.00383333	-0.0473333	0.0133333	-0.00283333			3	9.3		10.9						-1.98		-0.0235	-0.0218333	0.112	0.0906667	-0.0133333	-0.013	-0.0134783				-1.98		0.016	-0.0158333	-0.03975	0.185667	-0.011
-1.97		0.045	-0.0045	-0.005	0.0341667	0.121167	0.0698333	-0.00383333			-1.97		-0.00616667	-0.0244	-0.0206667	0.0705	-0.0473333	-0.02	-0.00283333			4	10.22		6.72						-1.97		-0.0568333	-0.0218333	-0.138	-0.076	-0.0133333	-0.013	-0.0134783				-1.97		-0.0173333	0.0175	0.01025	0.0856667	-0.011
-1.96		0.0116667	-0.0045	-0.0383333	0.00083333	0.0545	0.00316667	-0.00383333			-1.96		-0.0395	-0.0244	-0.0206667	-0.0295	-0.0473333	-0.0533333	0.0305			5	11.51		20.35						-1.96		-0.0235	0.0115	0.012	0.0906667	-0.0133333	-0.013	0.03				-1.96		-0.0173333	-0.0158333	0.06025	-0.0476667	0.0223333
-1.95		-0.0216667	-0.0045	-0.005	-0.0325	0.121167	0.00316667	-0.00383333			-1.95		0.0271667	0.0156	0.0126667	-0.0295	-0.0473333	-0.0533333	-0.00283333			6	20.85		19.97						-1.95		0.00983333	0.0115	-0.088	-0.0426667	0.02	-0.013	-0.0134783				-1.95		-0.0506667	0.0508333	0.16025	0.0523333	-0.011
-1.94		-0.0216667	-0.0045	-0.005	-0.0325	0.0545	0.0365	0.0295			-1.94		-0.00616667	0.0156	0.0126667	0.00383333	-0.0473333	-0.0533333	-0.00283333			7	18.99		11.82						-1.94		-0.0568333	0.0115	0.012	0.0573333	-0.0133333	-0.013	-0.0134783				-1.94		-0.0506667	-0.0158333	0.06025	-0.081	-0.011
-1.93		0.0116667	-0.0045	0.0283333	0.00083333	0.0211667	0.00316667	-0.00383333			-1.93		-0.0395	-0.0244	0.046	-0.0295	-0.014	-0.0533333	-0.00283333												-1.93		0.0765	-0.0218333	0.112	0.024	-0.0133333	-0.013	0.0734783				-1.93		0.0493333	0.0175	-0.08975	-0.0476667	-0.011
-1.92		0.045	-0.0045	-0.005	-0.0325	0.0878333	-0.0301667	-0.00383333			-1.92		-0.0395	-0.0044	-0.0206667	0.00383333	0.219333	-0.0533333	-0.00283333												-1.92		-0.0568333	-0.0218333	0.062	-0.109333	0.02	0.0203333	-0.0134783				-1.92		-0.0173333	-0.0158333	0.01025	0.119	0.0223333
-1.91		-0.0216667	-0.0045	-0.0383333	-0.0325	0.0211667	0.0365	-0.00383333			-1.91		-0.00616667	0.0156	0.0126667	-0.0295	0.186	-0.0533333	-0.00283333												-1.91		-0.0568333	-0.0218333	0.012	-0.109333	-0.0133333	0.0536667	-0.0134783				-1.91		0.016	-0.0158333	0.16025	-0.0476667	-0.011
-1.9		0.0116667	-0.0045	-0.005	-0.0325	-0.0455	-0.0301667	-0.00383333			-1.9		0.0605	-0.0044	-0.0206667	0.00383333	0.086	0.08	-0.00283333												-1.9		-0.0235	0.0115	-0.038	-0.076	0.02	-0.013	-0.0134783				-1.9		-0.0506667	-0.0158333	-0.23975	-0.0143333	0.0223333
-1.89		0.0116667	-0.0045	-0.005	-0.0325	0.0211667	0.00316667	-0.00383333			-1.89		0.0271667	0.0156	-0.0206667	-0.0295	0.0193333	0.0133333	-0.00283333												-1.89		0.0765	0.0115	0.062	0.024	-0.0133333	-0.013	-0.0134783				-1.89		0.016	-0.0158333	0.11025	0.0523333	-0.011
-1.88		0.045	0.0155	0.0283333	0.0341667	0.0545	-0.0301667	0.0295			-1.88		-0.0395	-0.0244	0.046	-0.0295	-0.014	0.0466667	-0.00283333												-1.88		-0.0235	0.0448333	-0.088	0.024	-0.0133333	-0.013	0.03				-1.88		-0.0506667	-0.0158333	-0.03975	-0.114333	-0.011
-1.87		0.0116667	-0.0045	-0.005	0.00083333	0.0211667	-0.0301667	-0.00383333			-1.87		0.0271667	-0.0044	-0.0206667	-0.0295	-0.014	0.0133333	0.0305												-1.87		-0.0235	0.0115	-0.038	0.0573333	-0.0133333	-0.013	0.03				-1.87		-0.0506667	0.0175	-0.18975	0.0856667	-0.011
-1.86		0.0116667	-0.0045	-0.0383333	0.00083333	-0.0121667	0.0365	-0.00383333			-1.86		-0.00616667	0.0556	-0.0206667	0.0371667	0.0193333	0.0133333	-0.00283333												-1.86		0.00983333	0.0115	-0.088	-0.00933333	-0.0133333	0.0203333	-0.0134783				-1.86		-0.0173333	0.0841667	0.21025	-0.0476667	-0.011
-1.85		0.0116667	-0.0045	0.0616667	-0.0325	-0.0455	0.00316667	-0.00383333			-1.85		-0.00616667	-0.0044	0.0126667	0.00383333	-0.0473333	-0.0533333	0.0305												-1.85		-0.0235	0.0448333	-0.038	0.0573333	0.02	-0.013	0.03				-1.85		0.016	-0.0158333	-0.33975	0.0856667	-0.011
-1.84		-0.0216667	-0.0045	-0.005	0.00083333	-0.0121667	-0.0301667	-0.00383333			-1.84		0.0271667	-0.0244	-0.0206667	-0.0295	-0.0473333	-0.0533333	-0.00283333												-1.84		-0.0235	0.0448333	0.312	0.0906667	-0.0133333	-0.013	-0.0134783				-1.84		0.016	-0.0158333	0.06025	0.0523333	0.0223333
-1.83		-0.0216667	-0.0045	-0.0383333	-0.0325	0.0545	-0.0301667	0.0295			-1.83		0.0605	-0.0244	0.0126667	-0.0295	-0.0473333	0.0133333	-0.00283333												-1.83		-0.0235	-0.0218333	-0.138	0.0573333	-0.0133333	-0.013	-0.0134783				-1.83		0.0826667	0.0175	-0.03975	-0.081	-0.011
-1.82		-0.0216667	-0.0045	0.095	-0.0325	-0.0121667	-0.0301667	-0.00383333			-1.82		-0.00616667	-0.0044	-0.0206667	0.00383333	-0.0473333	0.0133333	-0.00283333												-1.82		0.0431667	0.0115	0.062	0.0906667	-0.0133333	0.0203333	-0.0134783				-1.82		-0.0506667	-0.0158333	0.21025	0.019	-0.011
-1.81		-0.0216667	-0.0045	-0.005	0.0675	-0.0121667	0.0365	-0.00383333			-1.81		-0.0395	0.0356	-0.0206667	-0.0295	0.0193333	0.0133333	-0.00283333												-1.81		0.00983333	-0.0218333	0.112	-0.076	0.02	-0.013	-0.0134783				-1.81		-0.0506667	0.0175	-0.08975	-0.0143333	-0.011
-1.8		-0.0216667	-0.0045	-0.005	0.00083333	-0.0455	0.00316667	-0.00383333			-1.8		0.0605	0.0156	0.0126667	-0.0295	-0.014	0.0466667	-0.00283333												-1.8		-0.0235	-0.0218333	-0.038	0.0573333	0.02	-0.013	0.0734783				-1.8		0.016	-0.0158333	0.01025	0.019	-0.011
-1.79		0.045	0.0155	-0.005	-0.0325	-0.0121667	-0.0301667	-0.00383333			-1.79		-0.0395	-0.0044	0.0126667	-0.0295	0.0193333	-0.0533333	-0.00283333												-1.79		-0.0235	-0.0218333	0.012	-0.076	0.02	0.0536667	0.03				-1.79		0.016	-0.0158333	0.26025	0.0523333	-0.011
-1.78		0.0783333	-0.0045	-0.0383333	0.0341667	-0.0121667	-0.0301667	-0.00383333			-1.78		0.0271667	0.0156	0.0126667	0.00383333	0.0193333	-0.0533333	-0.00283333												-1.78		0.0431667	-0.0218333	0.012	-0.076	-0.0133333	-0.013	-0.0134783				-1.78		0.016	-0.0158333	-0.18975	-0.114333	-0.011
-1.77		-0.0216667	-0.0045	-0.0383333	0.0341667	-0.0455	-0.0301667	-0.00383333			-1.77		-0.00616667	0.0356	0.0793333	0.00383333	-0.0473333	-0.0533333	-0.00283333												-1.77		-0.0568333	0.0448333	0.062	0.0906667	-0.0133333	-0.013	-0.0134783				-1.77		0.016	-0.0158333	0.16025	-0.0476667	0.0223333
-1.76		-0.0216667	-0.0045	-0.005	-0.0325	-0.0455	0.0365	-0.00383333			-1.76		-0.00616667	-0.0044	-0.0206667	0.0705	-0.0473333	0.08	-0.00283333												-1.76		0.00983333	-0.0218333	-0.088	0.024	0.02	0.0203333	-0.0134783				-1.76		-0.0173333	-0.0158333	-0.03975	-0.081	0.0223333
-1.75		0.0116667	-0.0045	-0.005	-0.0325	0.0878333	0.00316667	-0.00383333			-1.75		-0.0395	-0.0244	-0.0206667	-0.0295	0.152667	-0.0533333	-0.00283333												-1.75		0.00983333	0.0448333	0.162	0.0906667	-0.0133333	0.0203333	0.03				-1.75		-0.0173333	0.0175	0.16025	-0.081	0.0223333
-1.74		-0.0216667	0.0155	-0.005	-0.0325	-0.0455	-0.0301667	-0.00383333			-1.74		-0.00616667	-0.0244	-0.0206667	0.103833	0.119333	-0.02	-0.00283333												-1.74		-0.0568333	0.0115	0.062	-0.0426667	0.02	-0.013	-0.0134783				-1.74		-0.0173333	-0.0158333	-0.13975	0.0856667	0.0556667
-1.73		0.045	-0.0045	-0.0383333	-0.0325	-0.0455	0.0365	-0.00383333			-1.73		0.0605	-0.0244	-0.0206667	0.0371667	0.0193333	0.0466667	0.0305												-1.73		0.00983333	0.0115	0.062	0.024	-0.0133333	0.087	-0.0134783				-1.73		0.016	0.0175	0.01025	-0.0143333	0.0223333
-1.72		0.045	-0.0045	-0.0383333	0.0341667	-0.0121667	0.0365	0.0295			-1.72		-0.00616667	-0.0044	0.0126667	-0.0295	-0.0473333	-0.02	-0.00283333												-1.72		-0.0568333	-0.0218333	-0.038	-0.0426667	0.02	0.0203333	-0.0134783				-1.72		-0.0173333	-0.0158333	-0.03975	0.0856667	0.0223333
-1.71		-0.0216667	-0.0045	-0.0383333	0.00083333	-0.0455	0.00316667	-0.00383333			-1.71		-0.0395	0.0156	0.0126667	-0.0295	-0.0473333	-0.0533333	-0.00283333												-1.71		0.0431667	0.0115	0.012	-0.00933333	-0.0133333	0.0203333	-0.0134783				-1.71		0.016	0.0841667	-0.03975	-0.0143333	-0.011
-1.7		-0.0216667	0.0155	-0.0383333	0.00083333	-0.0455	-0.0301667	-0.00383333			-1.7		0.0271667	-0.0244	0.0126667	-0.0295	0.0193333	0.113333	-0.00283333												-1.7		0.0765	-0.0218333	0.112	0.0573333	-0.0133333	0.0203333	-0.0134783				-1.7		-0.0506667	0.0175	0.06025	0.0523333	0.0223333
-1.69		-0.0216667	-0.0045	0.0616667	-0.0325	-0.0121667	0.0698333	-0.00383333			-1.69		-0.00616667	0.0356	0.0793333	0.00383333	-0.014	-0.02	0.0305												-1.69		0.00983333	-0.0218333	0.062	-0.109333	-0.0133333	-0.013	-0.0134783				-1.69		0.016	-0.0158333	-0.03975	-0.147667	0.0223333
-1.68		0.045	-0.0045	0.0616667	0.0675	-0.0121667	0.00316667	-0.00383333			-1.68		0.0271667	0.0356	-0.0206667	0.00383333	0.0526667	-0.0533333	-0.00283333												-1.68		0.00983333	-0.0218333	-0.088	0.124	0.02	-0.013	-0.0134783				-1.68		0.016	0.0508333	0.21025	0.0523333	-0.011
-1.67		0.0116667	-0.0045	0.0283333	0.00083333	0.0545	-0.0301667	-0.00383333			-1.67		-0.0395	-0.0044	0.046	-0.0295	0.0193333	-0.02	0.0305												-1.67		-0.0568333	0.0448333	-0.038	-0.109333	0.0533333	-0.013	-0.0134783				-1.67		-0.0506667	-0.0158333	-0.13975	0.0523333	-0.011
-1.66		-0.0216667	-0.0045	-0.005	0.00083333	0.0878333	0.0365	-0.00383333			-1.66		0.0271667	0.0356	0.0126667	-0.0295	-0.0473333	0.113333	0.0305												-1.66		-0.0235	-0.0218333	-0.088	0.0573333	-0.0133333	-0.013	-0.0134783				-1.66		0.016	-0.0158333	-0.03975	-0.081	-0.011
-1.65		-0.0216667	-0.0045	-0.005	0.00083333	-0.0121667	0.0365	-0.00383333			-1.65		-0.0395	-0.0044	-0.0206667	0.00383333	0.0526667	0.08	-0.00283333												-1.65		0.0431667	-0.0218333	0.012	-0.0426667	-0.0133333	-0.013	-0.0134783				-1.65		-0.0506667	0.0508333	-0.03975	0.0523333	-0.011
-1.64		-0.0216667	-0.0045	-0.005	0.0341667	0.0545	-0.0301667	-0.00383333			-1.64		-0.0395	-0.0044	-0.0206667	-0.0295	0.0193333	0.0133333	0.0305												-1.64		-0.0568333	0.0115	0.112	-0.00933333	0.0533333	-0.013	-0.0134783				-1.64		-0.0173333	-0.0158333	0.01025	0.019	-0.011
-1.63		0.045	-0.0045	-0.0383333	0.100833	-0.0455	-0.0301667	-0.00383333			-1.63		-0.0395	-0.0044	0.0126667	0.00383333	-0.0473333	0.0133333	0.0305												-1.63		0.00983333	0.0115	0.012	-0.076	0.02	-0.013	-0.0134783				-1.63		0.016	0.0508333	0.06025	0.0856667	-0.011
-1.62		-0.0216667	-0.0045	-0.0383333	0.100833	-0.0455	-0.0301667	-0.00383333			-1.62		-0.0395	-0.0044	-0.0206667	-0.0295	-0.0473333	-0.02	-0.00283333												-1.62		-0.0235	0.0115	0.062	-0.0426667	0.02	0.0203333	-0.0134783				-1.62		-0.0506667	-0.0158333	0.01025	0.019	-0.011
-1.61		0.0116667	-0.0045	-0.0383333	0.0675	-0.0455	-0.0301667	-0.00383333			-1.61		-0.0395	-0.0044	-0.0206667	-0.0295	-0.014	0.08	-0.00283333												-1.61		0.00983333	0.0115	0.112	-0.142667	-0.0133333	-0.013	-0.0134783				-1.61		-0.0506667	0.0175	0.16025	-0.147667	-0.011
-1.6		0.0116667	0.0155	-0.005	0.0341667	-0.0455	-0.0301667	-0.00383333			-1.6		-0.00616667	-0.0244	0.046	-0.0295	0.0526667	-0.02	-0.00283333												-1.6		-0.0235	-0.0218333	0.012	0.224	-0.0133333	-0.013	-0.0134783				-1.6		0.016	-0.0158333	-0.28975	0.019	-0.011
-1.59		0.0116667	-0.0045	-0.0383333	0.0341667	0.0211667	-0.0301667	-0.00383333			-1.59		0.0271667	-0.0244	0.0126667	0.00383333	-0.014	-0.0533333	-0.00283333												-1.59		-0.0235	0.0781667	-0.188	-0.0426667	-0.0133333	0.0203333	0.03				-1.59		-0.0173333	0.0175	-0.03975	-0.0143333	0.0223333
-1.58		0.0116667	0.0155	0.0616667	0.00083333	0.0545	-0.0301667	-0.00383333			-1.58		-0.0395	-0.0044	-0.0206667	-0.0295	-0.0473333	-0.02	-0.00283333												-1.58		0.00983333	-0.0218333	-0.138	0.0906667	-0.0133333	-0.013	0.03				-1.58		0.016	-0.0158333	-0.08975	0.0856667	-0.011
-1.57		0.045	-0.0045	-0.0383333	0.134167	-0.0121667	0.0698333	-0.00383333			-1.57		0.0938333	0.0156	0.0126667	0.00383333	0.119333	-0.02	-0.00283333												-1.57		0.0431667	-0.0218333	0.062	0.024	-0.0133333	-0.013	-0.0134783				-1.57		0.0493333	-0.0158333	0.06025	-0.0476667	-0.011
-1.56		0.045	-0.0045	-0.0383333	0.0341667	0.0211667	0.103167	-0.00383333			-1.56		-0.0395	-0.0244	-0.0206667	-0.0295	-0.014	0.0133333	-0.00283333												-1.56		0.00983333	0.0115	0.012	0.0573333	-0.0133333	0.0203333	0.03				-1.56		-0.0506667	-0.0158333	-0.13975	0.019	0.0223333
-1.55		-0.0216667	-0.0045	-0.0383333	-0.0325	-0.0121667	0.103167	-0.00383333			-1.55		-0.00616667	-0.0044	0.0126667	0.00383333	-0.0473333	0.0133333	-0.00283333												-1.55		-0.0235	-0.0218333	0.062	-0.00933333	-0.0133333	-0.013	-0.0134783				-1.55		-0.0506667	-0.0158333	0.01025	0.0523333	-0.011
-1.54		0.0116667	-0.0045	-0.005	0.00083333	-0.0455	0.00316667	-0.00383333			-1.54		-0.0395	-0.0044	0.0126667	-0.0295	-0.014	-0.02	-0.00283333												-1.54		-0.0235	0.0115	0.062	0.0573333	-0.0133333	0.0536667	-0.0134783				-1.54		-0.0506667	-0.0158333	0.01025	-0.0143333	-0.011
-1.53		-0.0216667	-0.0045	-0.0383333	-0.0325	-0.0455	0.0698333	-0.00383333			-1.53		0.0271667	-0.0044	-0.0206667	0.00383333	-0.0473333	-0.02	-0.00283333												-1.53		-0.0235	0.0115	-0.088	0.0906667	0.02	0.0203333	-0.0134783				-1.53		-0.0173333	-0.0158333	0.11025	0.0523333	0.0223333
-1.52		0.0116667	-0.0045	0.0616667	0.0341667	-0.0455	0.00316667	-0.00383333			-1.52		-0.00616667	0.0356	-0.0206667	0.0371667	-0.0473333	-0.02	-0.00283333												-1.52		0.143167	0.0448333	-0.038	0.024	-0.0133333	0.0203333	-0.0134783				-1.52		-0.0173333	-0.0158333	0.11025	0.0856667	-0.011
-1.51		0.0116667	-0.0045	0.0616667	-0.0325	-0.0121667	-0.0301667	-0.00383333			-1.51		0.0271667	0.0156	0.0126667	-0.0295	-0.0473333	0.0133333	-0.00283333												-1.51		-0.0568333	-0.0218333	0.012	-0.00933333	-0.0133333	0.0203333	-0.0134783				-1.51		-0.0506667	-0.0158333	-0.08975	0.019	-0.011
-1.5		0.0116667	-0.0045	-0.0383333	-0.0325	-0.0455	-0.0301667	-0.00383333			-1.5		-0.0395	-0.0044	-0.0206667	-0.0295	-0.0473333	0.0466667	0.0305												-1.5		-0.0568333	0.0115	0.012	-0.109333	0.02	0.0203333	-0.0134783				-1.5		0.016	0.0175	0.01025	-0.0143333	0.0223333
-1.49		-0.0216667	-0.0045	-0.005	-0.0325	-0.0455	-0.0301667	0.0295			-1.49		0.0938333	-0.0044	-0.0206667	-0.0295	-0.0473333	0.0466667	-0.00283333												-1.49		0.00983333	0.0115	0.212	0.157333	-0.0133333	-0.013	-0.0134783				-1.49		-0.0173333	0.0175	-0.03975	-0.0476667	0.0223333
-1.48		-0.0216667	-0.0045	0.0283333	-0.0325	-0.0121667	-0.0301667	-0.00383333			-1.48		0.0605	-0.0244	0.0126667	-0.0295	-0.0473333	-0.0533333	-0.00283333												-1.48		-0.0235	-0.0218333	-0.088	-0.076	-0.0133333	-0.013	-0.0134783				-1.48		0.016	-0.0158333	-0.03975	0.0523333	-0.011
-1.47		0.0116667	-0.0045	0.0283333	-0.0325	0.0211667	-0.0301667	-0.00383333			-1.47		-0.00616667	-0.0244	-0.0206667	-0.0295	-0.0473333	-0.0533333	-0.00283333												-1.47		-0.0235	0.0115	0.112	0.0573333	-0.0133333	0.0203333	-0.0134783				-1.47		-0.0506667	-0.0158333	0.06025	0.019	0.0223333
-1.46		-0.0216667	-0.0045	-0.0383333	-0.0325	-0.0455	-0.0301667	-0.00383333			-1.46		-0.00616667	0.0356	0.0126667	-0.0295	-0.014	-0.0533333	-0.00283333												-1.46		-0.0235	0.0115	-0.188	-0.00933333	0.02	-0.013	-0.0134783				-1.46		-0.0173333	-0.0158333	-0.03975	0.0856667	0.0223333
-1.45		0.0116667	-0.0045	-0.005	-0.0325	-0.0121667	-0.0301667	0.0295			-1.45		-0.0395	-0.0044	0.0126667	0.103833	-0.0473333	-0.02	-0.00283333												-1.45		-0.0235	0.0448333	0.262	-0.076	0.02	-0.013	-0.0134783				-1.45		0.016	0.0508333	0.16025	-0.081	-0.011
-1.44		-0.0216667	-0.0045	0.0616667	-0.0325	-0.0121667	-0.0301667	-0.00383333			-1.44		0.0271667	-0.0244	0.0126667	-0.0295	-0.0473333	-0.0533333	-0.00283333												-1.44		-0.0235	0.0115	0.012	0.0906667	-0.0133333	0.0203333	-0.0134783				-1.44		-0.0173333	0.0175	0.16025	0.152333	0.0223333
-1.43		-0.0216667	-0.0045	0.0616667	-0.0325	-0.0455	-0.0301667	-0.00383333			-1.43		-0.00616667	0.0356	0.0126667	0.0371667	-0.0473333	-0.0533333	-0.00283333												-1.43		-0.0235	-0.0218333	-0.088	0.0573333	-0.0133333	-0.013	0.0734783				-1.43		0.0493333	0.0508333	-0.03975	0.019	-0.011
-1.42		-0.0216667	-0.0045	0.0283333	-0.0325	-0.0455	0.103167	-0.00383333			-1.42		0.0271667	-0.0044	-0.0206667	0.00383333	-0.014	-0.02	-0.00283333												-1.42		0.00983333	-0.0218333	0.112	-0.00933333	-0.0133333	-0.013	0.03				-1.42		-0.0506667	-0.0158333	-0.03975	0.019	0.0223333
-1.41		0.0116667	-0.0045	-0.0383333	-0.0325	0.0545	0.0698333	-0.00383333			-1.41		0.0271667	-0.0044	0.0126667	0.00383333	-0.0473333	-0.02	-0.00283333												-1.41		-0.0235	0.0115	0.112	-0.0426667	-0.0133333	-0.013	0.03				-1.41		0.0493333	0.0175	-0.03975	0.019	-0.011
-1.4		-0.0216667	-0.0045	-0.005	0.0341667	-0.0121667	-0.0301667	-0.00383333			-1.4		0.0605	-0.0244	0.0126667	-0.0295	0.086	0.08	-0.00283333												-1.4		0.00983333	-0.0218333	0.062	-0.00933333	-0.0133333	-0.013	-0.0134783				-1.4		-0.0173333	0.0175	0.01025	0.119	-0.011
-1.39		-0.0216667	-0.0045	-0.0383333	-0.0325	-0.0121667	-0.0301667	-0.00383333			-1.39		-0.00616667	-0.0044	0.0126667	-0.0295	0.0526667	0.0466667	-0.00283333												-1.39		-0.0235	0.0115	0.012	-0.00933333	-0.0133333	-0.013	0.0734783				-1.39		-0.0506667	-0.0158333	-0.03975	-0.081	0.0223333
-1.38		-0.0216667	0.0155	-0.005	0.0341667	0.0211667	0.0698333	-0.00383333			-1.38		-0.00616667	-0.0044	0.0126667	0.0371667	-0.014	-0.0533333	-0.00283333												-1.38		0.00983333	0.0115	0.012	0.024	-0.0133333	-0.013	0.03				-1.38		-0.0173333	0.0175	-0.23975	-0.0476667	-0.011
-1.37		-0.0216667	-0.0045	-0.0383333	0.0341667	-0.0455	-0.0301667	0.0295			-1.37		-0.00616667	-0.0244	-0.0206667	0.00383333	0.086	0.0133333	-0.00283333												-1.37		-0.0235	0.0115	0.062	0.0573333	-0.0133333	-0.013	-0.0134783				-1.37		-0.0173333	-0.0158333	-0.18975	0.019	-0.011
-1.36		0.0116667	-0.0045	-0.005	0.0675	0.0211667	-0.0301667	0.0295			-1.36		-0.0395	-0.0044	-0.0206667	-0.0295	-0.014	0.0466667	-0.00283333												-1.36		-0.0235	-0.0218333	-0.038	0.024	-0.0133333	0.0203333	-0.0134783				-1.36		-0.0506667	0.0175	0.06025	-0.0143333	-0.011
-1.35		-0.0216667	-0.0045	-0.0383333	-0.0325	0.0211667	0.0365	-0.00383333			-1.35		0.127167	0.0156	0.112667	0.0371667	-0.0473333	-0.0533333	-0.00283333												-1.35		0.0765	-0.0218333	0.112	-0.076	-0.0133333	-0.013	-0.0134783				-1.35		-0.0173333	0.0175	-0.18975	-0.0476667	-0.011
-1.34		0.045	0.0355	0.0283333	0.00083333	0.0211667	0.0365	-0.00383333			-1.34		-0.00616667	-0.0244	0.0126667	0.0705	-0.0473333	0.0133333	-0.00283333												-1.34		0.00983333	-0.0218333	0.212	0.0573333	-0.0133333	-0.013	-0.0134783				-1.34		0.016	-0.0158333	0.06025	-0.081	-0.011
-1.33		0.0116667	0.0155	0.0283333	0.0341667	-0.0455	-0.0301667	-0.00383333			-1.33		0.0271667	-0.0044	-0.0206667	0.0705	-0.0473333	0.0466667	-0.00283333												-1.33		-0.0235	-0.0218333	0.262	-0.0426667	-0.0133333	0.0203333	-0.0134783				-1.33		0.016	-0.0158333	0.16025	0.019	-0.011
-1.32		-0.0216667	-0.0045	0.0283333	0.00083333	-0.0455	-0.0301667	-0.00383333			-1.32		-0.00616667	-0.0044	0.046	0.0371667	-0.0473333	-0.02	-0.00283333												-1.32		0.00983333	0.0115	-0.088	0.024	0.02	-0.013	0.03				-1.32		-0.0506667	-0.0158333	0.06025	-0.0143333	-0.011
-1.31		-0.0216667	-0.0045	-0.005	0.100833	-0.0455	-0.0301667	-0.00383333			-1.31		-0.00616667	-0.0044	0.0126667	0.00383333	-0.0473333	-0.02	0.0305												-1.31		-0.0568333	-0.0218333	0.062	-0.076	-0.0133333	-0.013	-0.0134783				-1.31		-0.0173333	-0.0158333	0.21025	-0.0476667	0.0223333
-1.3		0.0116667	-0.0045	-0.0383333	0.0675	-0.0455	-0.0301667	-0.00383333			-1.3		0.0605	0.0156	0.0126667	0.0371667	-0.0473333	0.113333	-0.00283333												-1.3		0.0765	0.0115	-0.138	-0.0426667	-0.0133333	-0.013	-0.0134783				-1.3		-0.0506667	-0.0158333	0.11025	0.019	0.0223333
-1.29		0.045	-0.0045	0.0283333	0.100833	-0.0455	-0.0301667	-0.00383333			-1.29		0.0605	-0.0244	-0.0206667	0.00383333	-0.0473333	-0.0533333	-0.00283333												-1.29		0.0431667	-0.0218333	0.062	0.024	-0.0133333	0.0203333	-0.0134783				-1.29		-0.0506667	-0.0158333	0.16025	0.019	-0.011
-1.28		0.0116667	-0.0045	-0.0383333	0.0341667	-0.0121667	-0.0301667	-0.00383333			-1.28		0.0271667	-0.0044	-0.0206667	0.0371667	-0.0473333	0.0133333	-0.00283333												-1.28		-0.0235	-0.0218333	-0.088	-0.00933333	-0.0133333	-0.013	0.03				-1.28		0.0493333	-0.0158333	-0.03975	-0.081	0.0223333
-1.27		0.0116667	-0.0045	0.0283333	0.00083333	-0.0121667	-0.0301667	-0.00383333			-1.27		0.0271667	-0.0244	-0.0206667	0.103833	0.0193333	0.08	-0.00283333												-1.27		0.143167	0.0115	-0.138	-0.00933333	-0.0133333	-0.013	-0.0134783				-1.27		0.0493333	-0.0158333	-0.23975	-0.0143333	-0.011
-1.26		0.0783333	-0.0045	0.0283333	0.0341667	-0.0455	-0.0301667	-0.00383333			-1.26		-0.0395	-0.0044	-0.0206667	0.103833	0.0193333	-0.02	-0.00283333												-1.26		0.0431667	-0.0218333	0.112	-0.00933333	-0.0133333	0.0203333	-0.0134783				-1.26		0.016	0.0175	0.11025	-0.114333	0.0223333
-1.25		0.0116667	0.0155	-0.0383333	0.00083333	-0.0121667	-0.0301667	0.0295			-1.25		0.0271667	-0.0044	-0.0206667	0.00383333	0.0526667	-0.02	-0.00283333												-1.25		0.00983333	-0.0218333	0.112	-0.0426667	0.0533333	0.0203333	-0.0134783				-1.25		-0.0173333	-0.0158333	0.01025	0.0523333	-0.011
-1.24		-0.0216667	-0.0045	-0.005	0.00083333	-0.0455	-0.0301667	-0.00383333			-1.24		-0.00616667	0.0156	0.0126667	-0.0295	-0.014	0.08	-0.00283333												-1.24		-0.0235	0.0781667	-0.238	-0.076	0.0533333	0.0203333	0.03				-1.24		0.0493333	0.0175	-0.13975	0.0523333	-0.011
-1.23		-0.0216667	0.0155	-0.005	0.00083333	-0.0455	-0.0301667	-0.00383333			-1.23		0.127167	0.0156	-0.0206667	-0.0295	-0.0473333	-0.02	-0.00283333												-1.23		-0.0568333	0.0115	-0.088	0.024	-0.0133333	-0.013	-0.0134783				-1.23		-0.0506667	-0.0158333	0.11025	0.019	-0.011
-1.22		0.0116667	-0.0045	0.0616667	0.00083333	-0.0455	-0.0301667	-0.00383333			-1.22		-0.00616667	-0.0044	-0.0206667	-0.0295	-0.0473333	0.0133333	-0.00283333												-1.22		-0.0235	0.0115	0.062	-0.00933333	-0.0133333	-0.013	0.03				-1.22		0.016	0.0175	-0.03975	-0.081	-0.011
-1.21		0.0116667	0.0155	-0.0383333	0.0675	-0.0455	0.0698333	-0.00383333			-1.21		-0.00616667	-0.0244	-0.0206667	-0.0295	-0.0473333	0.146667	-0.00283333												-1.21		0.0431667	0.0115	0.012	-0.00933333	-0.0133333	-0.013	-0.0134783				-1.21		-0.0173333	-0.0158333	0.21025	0.119	-0.011
-1.2		0.0116667	-0.0045	-0.0383333	0.00083333	-0.0455	0.103167	-0.00383333			-1.2		-0.0395	-0.0044	0.0793333	-0.0295	-0.0473333	0.0466667	-0.00283333												-1.2		0.00983333	-0.0218333	0.062	-0.00933333	-0.0133333	0.0203333	-0.0134783				-1.2		0.016	-0.0158333	0.06025	-0.114333	-0.011
-1.19		0.0116667	-0.0045	-0.0383333	0.0341667	-0.0455	0.0365	-0.00383333			-1.19		-0.00616667	-0.0244	-0.0206667	-0.0295	-0.0473333	-0.0533333	-0.00283333												-1.19		0.00983333	0.0115	0.062	0.024	0.02	-0.013	-0.0134783				-1.19		-0.0173333	0.0175	-0.13975	0.0523333	-0.011
-1.18		-0.0216667	-0.0045	-0.005	0.0675	0.0211667	0.0698333	-0.00383333			-1.18		-0.00616667	0.0556	-0.0206667	-0.0295	-0.014	-0.02	-0.00283333												-1.18		0.00983333	-0.0218333	-0.038	-0.0426667	0.02	-0.013	-0.0134783				-1.18		-0.0506667	-0.0158333	-0.03975	0.019	-0.011
-1.17		-0.0216667	-0.0045	0.0283333	0.00083333	0.221167	-0.0301667	-0.00383333			-1.17		-0.0395	-0.0044	-0.0206667	-0.0295	0.086	0.0133333	-0.00283333												-1.17		0.00983333	-0.0218333	0.062	0.024	-0.0133333	0.0536667	0.03				-1.17		0.0493333	-0.0158333	0.06025	-0.0476667	-0.011
-1.16		-0.0216667	-0.0045	-0.0383333	0.0341667	0.0211667	-0.0301667	-0.00383333			-1.16		-0.0395	-0.0244	-0.0206667	-0.0295	0.0193333	0.0133333	-0.00283333												-1.16		0.00983333	0.0781667	-0.038	-0.00933333	-0.0133333	-0.013	-0.0134783				-1.16		-0.0173333	-0.0158333	-0.13975	-0.114333	-0.011
-1.15		-0.0216667	-0.0045	0.0616667	-0.0325	-0.0121667	0.00316667	-0.00383333			-1.15		0.0271667	-0.0044	0.0126667	0.00383333	-0.014	-0.0533333	-0.00283333												-1.15		-0.0568333	-0.0218333	-0.188	0.0573333	-0.0133333	-0.013	-0.0134783				-1.15		-0.0173333	-0.0158333	-0.03975	0.0856667	-0.011
-1.14		0.0116667	-0.0045	0.0283333	0.0341667	-0.0455	0.00316667	-0.00383333			-1.14		0.0271667	-0.0044	-0.0206667	0.0371667	-0.0473333	-0.02	-0.00283333												-1.14		-0.0235	-0.0218333	0.112	-0.076	-0.0133333	0.0203333	0.0734783				-1.14		0.016	-0.0158333	0.11025	-0.0476667	-0.011
-1.13		0.0116667	0.0155	-0.005	-0.0325	-0.0455	0.0698333	0.0295			-1.13		-0.00616667	0.0156	0.0126667	0.0371667	-0.0473333	0.113333	-0.00283333												-1.13		-0.0235	-0.0218333	0.112	0.124	-0.0133333	-0.013	0.03				-1.13		0.0493333	-0.0158333	0.01025	-0.0143333	-0.011
-1.12		0.0116667	-0.0045	-0.0383333	-0.0325	0.0878333	-0.0301667	-0.00383333			-1.12		0.0605	-0.0244	-0.0206667	0.0371667	0.0526667	0.0133333	0.0305												-1.12		-0.0568333	0.0115	-0.138	0.0573333	-0.0133333	-0.013	-0.0134783				-1.12		0.0493333	-0.0158333	0.06025	-0.114333	0.0223333
-1.11		0.0116667	-0.0045	-0.0383333	-0.0325	-0.0121667	0.00316667	-0.00383333			-1.11		-0.0395	-0.0044	0.0126667	0.0371667	0.0526667	0.0133333	-0.00283333												-1.11		-0.0235	-0.0218333	-0.088	-0.0426667	-0.0133333	0.0203333	-0.0134783				-1.11		-0.0173333	0.0175	0.01025	-0.0476667	0.0223333
-1.1		-0.0216667	0.0155	-0.005	-0.0325	-0.0455	-0.0301667	-0.00383333			-1.1		-0.0395	0.0356	0.0126667	0.0371667	0.0193333	0.0133333	-0.00283333												-1.1		-0.0568333	0.0115	-0.088	-0.00933333	0.02	-0.013	-0.0134783				-1.1		0.0493333	-0.0158333	0.06025	0.152333	-0.011
-1.09		-0.0216667	-0.0045	-0.0383333	0.0341667	0.0211667	-0.0301667	-0.00383333			-1.09		-0.00616667	0.0156	0.0126667	0.0371667	-0.014	-0.02	0.0305												-1.09		-0.0235	-0.0218333	0.162	-0.076	-0.0133333	0.0203333	0.03				-1.09		-0.0506667	-0.0158333	-0.03975	-0.114333	0.0223333
-1.08		0.0116667	0.0155	-0.005	0.0675	0.0211667	-0.0301667	-0.00383333			-1.08		-0.0395	-0.0244	0.0126667	-0.0295	0.086	-0.0533333	-0.00283333												-1.08		-0.0235	-0.0218333	-0.038	-0.00933333	0.02	0.087	0.0734783				-1.08		-0.0506667	0.0175	0.06025	0.0523333	0.0223333
-1.07		0.0116667	0.0155	-0.0383333	0.0341667	0.0211667	-0.0301667	-0.00383333			-1.07		0.0271667	0.0156	0.046	-0.0295	0.0193333	0.08	-0.00283333												-1.07		0.00983333	-0.0218333	-0.038	0.0573333	-0.0133333	-0.013	0.03				-1.07		-0.0506667	-0.0158333	-0.18975	-0.0476667	0.0223333
-1.06		-0.0216667	-0.0045	-0.005	-0.0325	-0.0455	-0.0301667	-0.00383333			-1.06		-0.0395	-0.0244	-0.0206667	-0.0295	-0.014	-0.02	-0.00283333												-1.06		0.00983333	0.0115	0.012	0.0573333	-0.0133333	-0.013	-0.0134783				-1.06		0.0493333	0.0508333	-0.23975	0.019	0.0556667
-1.05		0.0116667	-0.0045	-0.005	-0.0325	-0.0121667	-0.0301667	-0.00383333			-1.05		-0.00616667	0.0356	-0.0206667	0.0371667	0.0193333	0.0133333	-0.00283333												-1.05		0.00983333	-0.0218333	0.012	-0.00933333	-0.0133333	-0.013	-0.0134783				-1.05		-0.0506667	-0.0158333	0.16025	0.0856667	-0.011
-1.04		0.045	-0.0045	-0.005	-0.0325	0.0211667	-0.0301667	-0.00383333			-1.04		-0.00616667	-0.0044	-0.0206667	0.00383333	-0.0473333	-0.0533333	-0.00283333												-1.04		-0.0568333	-0.0218333	-0.088	-0.076	-0.0133333	-0.013	-0.0134783				-1.04		0.016	0.0841667	-0.03975	0.019	-0.011
-1.03		-0.0216667	-0.0045	0.0616667	-0.0325	0.0545	-0.0301667	-0.00383333			-1.03		0.0605	0.0556	0.0126667	-0.0295	-0.0473333	-0.0533333	-0.00283333												-1.03		0.109833	0.0115	0.112	0.0906667	-0.0133333	0.0203333	-0.0134783				-1.03		-0.0173333	-0.0158333	-0.08975	-0.081	-0.011
-1.02		-0.0216667	-0.0045	0.0283333	-0.0325	0.0545	0.00316667	-0.00383333			-1.02		-0.0395	-0.0044	-0.0206667	0.0371667	-0.014	0.0466667	-0.00283333												-1.02		0.00983333	-0.0218333	0.062	-0.076	-0.0133333	-0.013	0.03				-1.02		0.016	0.0841667	-0.03975	0.0523333	0.0556667
-1.01		-0.0216667	0.0155	-0.005	-0.0325	-0.0121667	0.0365	-0.00383333			-1.01		-0.00616667	0.0156	0.0126667	0.00383333	0.119333	-0.0533333	-0.00283333												-1.01		-0.0568333	0.0115	0.062	0.024	-0.0133333	0.0203333	-0.0134783				-1.01		-0.0173333	-0.0158333	-0.13975	0.019	-0.011
-1		0.0116667	-0.0045	-0.005	-0.0325	-0.0121667	0.0365	-0.00383333			-1		-0.00616667	0.0156	-0.0206667	0.00383333	0.0526667	0.0133333	-0.00283333												-1		0.0431667	-0.0218333	0.012	0.024	-0.0133333	-0.013	0.03				-1		0.016	-0.0158333	0.06025	0.019	-0.011
-0.99		-0.0216667	-0.0045	-0.005	-0.0325	0.0211667	0.00316667	-0.00383333			-0.99		-0.00616667	-0.0044	-0.0206667	0.0705	-0.014	-0.02	-0.00283333												-0.99		-0.0235	-0.0218333	-0.188	-0.00933333	0.02	-0.013	0.03				-0.99		0.016	-0.0158333	-0.13975	-0.0143333	-0.011
-0.98		-0.0216667	-0.0045	0.0616667	-0.0325	-0.0455	-0.0301667	-0.00383333			-0.98		-0.0395	0.0156	-0.0206667	0.00383333	0.0193333	-0.02	-0.00283333												-0.98		-0.0235	-0.0218333	-0.038	-0.076	-0.0133333	-0.013	-0.0134783				-0.98		0.016	-0.0158333	0.06025	-0.0476667	-0.011
-0.97		0.0116667	-0.0045	-0.005	-0.0325	-0.0455	0.0365	-0.00383333			-0.97		-0.00616667	0.0156	-0.0206667	0.0371667	0.0526667	-0.02	-0.00283333												-0.97		-0.0235	0.0115	-0.038	0.0573333	0.02	-0.013	-0.0134783				-0.97		-0.0173333	0.0508333	0.11025	0.185667	-0.011
-0.96		-0.0216667	-0.0045	0.0283333	-0.0325	-0.0121667	0.0365	-0.00383333			-0.96		0.0271667	-0.0044	0.0126667	0.00383333	0.152667	-0.0533333	-0.00283333												-0.96		0.109833	0.0448333	-0.038	0.024	-0.0133333	0.0203333	-0.0134783				-0.96		0.0826667	-0.0158333	0.06025	-0.0143333	-0.011
-0.95		-0.0216667	-0.0045	-0.005	-0.0325	0.0211667	0.103167	-0.00383333			-0.95		-0.0395	-0.0044	-0.0206667	0.00383333	0.0193333	-0.02	-0.00283333												-0.95		0.00983333	0.0448333	-0.038	-0.00933333	-0.0133333	0.0536667	-0.0134783				-0.95		-0.0173333	-0.0158333	0.06025	-0.081	-0.011
-0.94		0.045	-0.0045	0.0616667	-0.0325	0.0211667	0.0365	-0.00383333			-0.94		0.0271667	-0.0044	-0.0206667	-0.0295	0.0526667	0.0133333	-0.00283333												-0.94		0.00983333	-0.0218333	0.162	-0.00933333	-0.0133333	-0.013	0.03				-0.94		-0.0173333	0.0175	0.06025	-0.081	-0.011
-0.93		-0.0216667	-0.0045	-0.005	-0.0325	0.0211667	-0.0301667	-0.00383333			-0.93		-0.0395	-0.0044	-0.0206667	-0.0295	-0.0473333	0.113333	-0.00283333												-0.93		-0.0235	0.0115	-0.088	-0.00933333	-0.0133333	-0.013	-0.0134783				-0.93		-0.0173333	0.0175	-0.18975	-0.0476667	-0.011
-0.92		-0.0216667	-0.0045	-0.0383333	-0.0325	0.0545	0.0365	-0.00383333			-0.92		0.0271667	-0.0244	-0.0206667	0.00383333	-0.014	0.113333	-0.00283333												-0.92		0.00983333	0.0115	-0.038	0.0573333	0.0533333	-0.013	-0.0134783				-0.92		-0.0506667	-0.0158333	0.11025	0.0856667	-0.011
-0.91		0.0116667	0.0155	-0.0383333	-0.0325	-0.0121667	0.0698333	-0.00383333			-0.91		0.127167	-0.0244	-0.0206667	0.00383333	-0.014	0.18	-0.00283333												-0.91		-0.0568333	0.0115	-0.038	-0.00933333	0.02	-0.013	-0.0134783				-0.91		0.0493333	-0.0158333	-0.08975	0.119	-0.011
-0.9		-0.0216667	0.0155	-0.005	-0.0325	-0.0455	0.0365	-0.00383333			-0.9		-0.00616667	-0.0244	0.0793333	-0.0295	0.0193333	-0.02	-0.00283333												-0.9		0.00983333	0.0115	0.212	0.0573333	-0.0133333	-0.013	0.0734783				-0.9		-0.0506667	0.0175	-0.08975	-0.114333	-0.011
-0.89		-0.0216667	0.0155	-0.005	0.00083333	0.0545	0.00316667	-0.00383333			-0.89		0.0271667	0.0156	-0.0206667	0.00383333	-0.014	-0.0533333	-0.00283333												-0.89		-0.0568333	0.0115	-0.138	-0.076	0.0533333	-0.013	0.03				-0.89		-0.0173333	-0.0158333	0.06025	-0.0143333	-0.011
-0.88		0.0116667	-0.0045	0.0616667	0.0675	0.0878333	-0.0301667	-0.00383333			-0.88		-0.00616667	0.0356	-0.0206667	-0.0295	-0.0473333	-0.02	-0.00283333												-0.88		0.00983333	-0.0218333	0.062	0.024	-0.0133333	0.0536667	-0.0134783				-0.88		-0.0506667	-0.0158333	-0.13975	-0.0476667	-0.011
-0.87		0.0116667	-0.0045	-0.0383333	0.00083333	0.0211667	-0.0301667	-0.00383333			-0.87		-0.00616667	-0.0044	0.046	-0.0295	-0.0473333	-0.0533333	-0.00283333												-0.87		0.00983333	-0.0218333	0.062	0.024	-0.0133333	-0.013	-0.0134783				-0.87		-0.0173333	0.0175	0.11025	0.0856667	0.0223333
-0.86		-0.0216667	0.0155	-0.0383333	0.0341667	-0.0455	-0.0301667	-0.00383333			-0.86		0.0271667	-0.0044	-0.0206667	0.0371667	-0.0473333	-0.0533333	0.0305												-0.86		0.00983333	-0.0218333	0.062	0.157333	-0.0133333	-0.013	-0.0134783				-0.86		-0.0506667	0.0175	-0.13975	-0.081	0.0556667
-0.85		-0.0216667	0.0355	0.0283333	-0.0325	-0.0455	-0.0301667	-0.00383333			-0.85		0.0271667	-0.0044	0.0126667	0.0371667	-0.0473333	-0.0533333	-0.00283333												-0.85		0.0431667	0.0115	0.062	-0.076	0.02	-0.013	-0.0134783				-0.85		0.016	-0.0158333	0.11025	0.019	0.0556667
-0.84		0.0783333	-0.0045	-0.005	-0.0325	-0.0455	-0.0301667	-0.00383333			-0.84		0.0271667	-0.0244	-0.0206667	0.0705	-0.014	0.0133333	-0.00283333												-0.84		0.0431667	-0.0218333	0.012	-0.0426667	-0.0133333	-0.013	-0.0134783				-0.84		-0.0506667	0.0175	-0.13975	0.0523333	0.0556667
-0.83		0.0116667	0.0155	0.128333	-0.0325	-0.0121667	-0.0301667	0.0295			-0.83		-0.0395	-0.0044	-0.0206667	0.0371667	0.086	0.0466667	-0.00283333												-0.83		0.00983333	0.0115	-0.038	-0.076	-0.0133333	0.0203333	-0.0134783				-0.83		-0.0173333	0.0175	-0.08975	0.0523333	0.0223333
-0.82		-0.0216667	-0.0045	-0.005	0.0341667	-0.0455	0.103167	-0.00383333			-0.82		-0.0395	-0.0044	-0.0206667	0.0371667	0.0193333	0.113333	-0.00283333												-0.82		0.00983333	0.0115	0.062	0.024	-0.0133333	0.0203333	-0.0134783				-0.82		-0.0506667	0.0175	0.01025	0.019	0.0223333
-0.81		-0.0216667	-0.0045	-0.0383333	0.0341667	-0.0455	0.00316667	-0.00383333			-0.81		-0.0395	0.0156	-0.0206667	-0.0295	0.086	0.0133333	-0.00283333												-0.81		0.00983333	0.0781667	0.062	0.0573333	0.02	0.0536667	-0.0134783				-0.81		0.0493333	-0.0158333	0.16025	-0.081	-0.011
-0.8		0.0116667	-0.0045	-0.005	0.00083333	-0.0455	-0.0301667	-0.00383333			-0.8		-0.00616667	-0.0044	-0.0206667	-0.0295	0.0526667	-0.0533333	-0.00283333												-0.8		0.00983333	-0.0218333	0.162	-0.076	0.02	-0.013	-0.0134783				-0.8		-0.0506667	-0.0158333	0.11025	-0.0143333	0.0223333
-0.79		-0.0216667	-0.0045	0.0283333	-0.0325	-0.0455	-0.0301667	-0.00383333			-0.79		0.0605	0.0356	-0.0206667	-0.0295	0.086	-0.0533333	-0.00283333												-0.79		0.0431667	0.0115	0.062	-0.00933333	0.0866667	-0.013	0.03				-0.79		0.016	0.0175	0.06025	-0.0143333	0.0223333
-0.78		0.045	-0.0045	-0.005	0.100833	-0.0121667	-0.0301667	0.0295			-0.78		0.0605	0.0156	0.0126667	0.00383333	0.0526667	0.0133333	-0.00283333												-0.78		-0.0235	0.0115	-0.088	0.0906667	0.0533333	-0.013	-0.0134783				-0.78		0.0493333	-0.0158333	-0.13975	0.0856667	0.0223333
-0.77		0.0116667	-0.0045	-0.005	0.0341667	0.0211667	-0.0301667	-0.00383333			-0.77		-0.00616667	-0.0044	-0.0206667	0.00383333	-0.014	-0.0533333	-0.00283333												-0.77		-0.0235	0.0115	-0.038	-0.00933333	-0.0133333	-0.013	-0.0134783				-0.77		0.016	0.0175	0.21025	-0.0476667	-0.011
-0.76		-0.0216667	0.0155	-0.005	-0.0325	-0.0121667	-0.0301667	-0.00383333			-0.76		0.0271667	-0.0244	0.046	-0.0295	-0.0473333	-0.02	-0.00283333												-0.76		0.0431667	-0.0218333	0.012	0.024	-0.0133333	-0.013	-0.0134783				-0.76		-0.0506667	-0.0158333	-0.03975	0.019	-0.011
-0.75		-0.0216667	-0.0045	-0.0383333	0.00083333	-0.0121667	-0.0301667	0.0961667			-0.75		-0.00616667	-0.0244	-0.0206667	0.0371667	0.0526667	0.0466667	-0.00283333												-0.75		-0.0235	0.0115	0.012	0.0573333	0.02	-0.013	-0.0134783				-0.75		0.016	-0.0158333	0.16025	-0.081	-0.011
-0.74		0.045	-0.0045	-0.0383333	0.00083333	-0.0455	-0.0301667	-0.00383333			-0.74		-0.0395	0.0156	-0.0206667	0.0371667	0.0526667	0.08	-0.00283333												-0.74		0.0765	-0.0218333	0.162	-0.0426667	-0.0133333	-0.013	0.03				-0.74		0.016	-0.0158333	0.06025	0.0856667	-0.011
-0.73		-0.0216667	-0.0045	-0.0383333	-0.0325	0.0211667	0.0365	-0.00383333			-0.73		0.0271667	-0.0244	-0.0206667	-0.0295	-0.014	-0.0533333	-0.00283333												-0.73		0.00983333	-0.0218333	-0.138	-0.0426667	-0.0133333	0.0536667	-0.0134783				-0.73		0.0493333	-0.0158333	0.11025	-0.081	0.0223333
-0.72		-0.0216667	-0.0045	-0.0383333	-0.0325	-0.0121667	0.0365	-0.00383333			-0.72		-0.0395	-0.0044	0.0126667	0.0705	-0.014	0.0133333	-0.00283333												-0.72		0.00983333	-0.0218333	-0.038	0.0573333	0.0533333	0.0203333	-0.0134783				-0.72		-0.0173333	0.0175	-0.13975	0.0523333	-0.011
-0.71		0.0116667	-0.0045	0.0283333	-0.0325	-0.0455	0.00316667	0.0628333			-0.71		-0.00616667	-0.0044	-0.0206667	0.0371667	0.219333	0.0466667	-0.00283333												-0.71		0.0431667	0.0115	-0.038	0.024	-0.0133333	0.0203333	0.03				-0.71		0.016	-0.0158333	-0.13975	-0.0476667	-0.011
-0.7		-0.0216667	-0.0045	0.0616667	-0.0325	-0.0455	-0.0301667	-0.00383333			-0.7		-0.00616667	-0.0044	0.046	-0.0295	0.0526667	0.08	-0.00283333												-0.7		0.0431667	0.0115	0.112	-0.076	-0.0133333	-0.013	-0.0134783				-0.7		0.016	0.0508333	0.21025	-0.0476667	-0.011
-0.69		0.045	-0.0045	-0.0383333	0.0675	-0.0121667	-0.0301667	-0.00383333			-0.69		0.0271667	-0.0244	-0.0206667	-0.0295	-0.0473333	0.0466667	-0.00283333												-0.69		0.00983333	-0.0218333	-0.038	-0.0426667	0.02	-0.013	0.03				-0.69		-0.0173333	0.0175	-0.08975	0.0856667	0.0223333
-0.68		-0.0216667	0.0155	0.0283333	-0.0325	0.121167	-0.0301667	-0.00383333			-0.68		-0.0395	-0.0244	-0.0206667	-0.0295	-0.014	-0.02	-0.00283333												-0.68		0.0765	-0.0218333	-0.088	-0.00933333	-0.0133333	-0.013	-0.0134783				-0.68		-0.0506667	0.0508333	0.01025	-0.0143333	-0.011
-0.67		-0.0216667	-0.0045	0.0616667	0.00083333	-0.0121667	-0.0301667	-0.00383333			-0.67		-0.00616667	-0.0244	0.0126667	-0.0295	-0.0473333	-0.0533333	-0.00283333												-0.67		-0.0235	-0.0218333	-0.038	-0.109333	-0.0133333	-0.013	-0.0134783				-0.67		0.016	-0.0158333	0.06025	-0.0143333	-0.011
-0.66		0.0116667	-0.0045	-0.005	-0.0325	0.0211667	-0.0301667	-0.00383333			-0.66		0.0605	0.0556	-0.0206667	0.00383333	0.0193333	-0.0533333	-0.00283333												-0.66		-0.0235	0.0115	0.212	-0.00933333	0.02	-0.013	-0.0134783				-0.66		0.0826667	-0.0158333	-0.23975	0.019	-0.011
-0.65		0.0116667	0.0155	-0.0383333	-0.0325	-0.0121667	-0.0301667	0.0295			-0.65		-0.00616667	-0.0044	0.0126667	-0.0295	0.086	-0.0533333	-0.00283333												-0.65		-0.0568333	-0.0218333	-0.188	-0.00933333	0.0533333	-0.013	-0.0134783				-0.65		-0.0173333	-0.0158333	-0.03975	0.0523333	-0.011
-0.64		-0.0216667	0.0155	0.0283333	-0.0325	0.0211667	0.0698333	-0.00383333			-0.64		-0.00616667	-0.0244	0.0126667	-0.0295	0.086	0.113333	-0.00283333												-0.64		-0.0568333	0.0115	-0.138	0.024	-0.0133333	-0.013	-0.0134783				-0.64		-0.0506667	0.0175	-0.08975	0.0856667	-0.011
-0.63		0.0116667	-0.0045	-0.0383333	-0.0325	0.0211667	0.0365	-0.00383333			-0.63		0.0271667	-0.0044	-0.0206667	-0.0295	0.0526667	0.0133333	-0.00283333												-0.63		-0.0235	0.0115	0.262	0.024	-0.0133333	0.0203333	-0.0134783				-0.63		-0.0173333	-0.0158333	-0.13975	-0.0476667	-0.011
-0.62		-0.0216667	-0.0045	-0.0383333	0.0675	0.0211667	0.0698333	-0.00383333			-0.62		-0.0395	-0.0244	-0.0206667	-0.0295	0.0193333	0.0133333	-0.00283333												-0.62		-0.0235	0.0115	-0.138	-0.109333	-0.0133333	-0.013	-0.0134783				-0.62		-0.0173333	-0.0158333	0.11025	0.019	-0.011
-0.61		-0.0216667	-0.0045	0.0283333	0.100833	0.0878333	0.00316667	-0.00383333			-0.61		0.0271667	0.0156	-0.0206667	-0.0295	-0.014	0.0133333	-0.00283333												-0.61		0.00983333	-0.0218333	0.062	0.024	-0.0133333	-0.013	-0.0134783				-0.61		-0.0506667	-0.0158333	0.16025	0.019	-0.011
-0.6		-0.0216667	-0.0045	-0.005	0.0675	0.0211667	-0.0301667	-0.00383333			-0.6		0.0605	-0.0244	0.046	-0.0295	-0.0473333	0.0133333	-0.00283333												-0.6		-0.0568333	0.0115	0.012	-0.109333	-0.0133333	0.0203333	-0.0134783				-0.6		0.0493333	0.0175	-0.13975	-0.0476667	-0.011
-0.59		0.0116667	-0.0045	-0.005	0.00083333	0.0211667	0.00316667	-0.00383333			-0.59		-0.0395	-0.0044	0.046	-0.0295	-0.0473333	-0.0533333	-0.00283333												-0.59		-0.0568333	0.0115	-0.088	0.024	0.02	0.0203333	-0.0134783				-0.59		0.016	0.0175	-0.03975	0.0856667	0.0223333
-0.58		0.0116667	-0.0045	-0.005	-0.0325	-0.0455	0.0365	-0.00383333			-0.58		0.0605	-0.0044	-0.0206667	-0.0295	-0.014	-0.0533333	-0.00283333												-0.58		0.00983333	0.0115	-0.188	-0.076	-0.0133333	-0.013	-0.0134783				-0.58		-0.0173333	-0.0158333	0.11025	-0.114333	-0.011
-0.57		-0.0216667	0.0155	0.0616667	-0.0325	0.0878333	-0.0301667	0.0295			-0.57		-0.00616667	-0.0244	0.046	-0.0295	-0.014	-0.0533333	-0.00283333												-0.57		-0.0235	0.0781667	-0.038	0.0906667	0.0533333	0.0203333	0.03				-0.57		0.0826667	-0.0158333	-0.03975	-0.0143333	-0.011
-0.56		-0.0216667	-0.0045	0.0616667	-0.0325	-0.0121667	-0.0301667	-0.00383333			-0.56		-0.00616667	-0.0044	0.0126667	0.103833	0.086	-0.0533333	-0.00283333												-0.56		0.00983333	-0.0218333	-0.138	0.0573333	-0.0133333	0.0203333	-0.0134783				-0.56		0.016	-0.0158333	-0.03975	-0.0143333	-0.011
-0.55		-0.0216667	0.0155	-0.005	-0.0325	0.0878333	-0.0301667	-0.00383333			-0.55		-0.0395	0.0356	-0.0206667	0.00383333	0.119333	-0.0533333	-0.00283333												-0.55		-0.0568333	-0.0218333	0.062	-0.00933333	-0.0133333	-0.013	-0.0134783				-0.55		0.0493333	-0.0158333	0.11025	0.0523333	-0.011
-0.54		-0.0216667	-0.0045	-0.005	0.00083333	0.121167	-0.0301667	-0.00383333			-0.54		0.0271667	-0.0044	0.0126667	-0.0295	0.0526667	-0.0533333	-0.00283333												-0.54		0.00983333	-0.0218333	0.112	0.0906667	-0.0133333	-0.013	0.03				-0.54		0.0826667	-0.0158333	0.16025	0.019	-0.011
-0.53		-0.0216667	-0.0045	-0.0383333	-0.0325	0.121167	-0.0301667	-0.00383333			-0.53		0.0271667	-0.0044	-0.0206667	-0.0295	-0.014	-0.0533333	-0.00283333												-0.53		-0.0568333	-0.0218333	-0.088	-0.076	0.02	-0.013	0.03				-0.53		-0.0506667	0.0508333	-0.18975	0.0856667	-0.011
-0.52		0.045	-0.0045	-0.0383333	-0.0325	-0.0121667	-0.0301667	-0.00383333			-0.52		-0.0395	-0.0244	-0.0206667	0.0705	-0.0473333	0.0133333	-0.00283333												-0.52		-0.0568333	0.0115	-0.238	-0.00933333	-0.0133333	-0.013	-0.0134783				-0.52		0.016	0.0175	0.21025	-0.0476667	-0.011
-0.51		-0.0216667	-0.0045	-0.0383333	0.00083333	-0.0455	-0.0301667	-0.00383333			-0.51		0.0271667	-0.0244	-0.0206667	0.103833	-0.014	0.0133333	-0.00283333												-0.51		-0.0235	0.0781667	0.212	-0.076	-0.0133333	-0.013	-0.0134783				-0.51		0.016	-0.0158333	-0.13975	-0.0143333	-0.011
-0.5		-0.0216667	-0.0045	0.0283333	-0.0325	-0.0455	0.0365	0.0295			-0.5		0.0605	0.0356	0.0126667	0.0371667	-0.0473333	0.0466667	-0.00283333												-0.5		-0.0235	0.0115	0.012	-0.142667	0.02	0.0203333	0.03				-0.5		-0.0173333	0.0175	-0.03975	-0.0476667	-0.011
-0.49		-0.0216667	-0.0045	-0.005	0.00083333	-0.0455	0.0365	-0.00383333			-0.49		-0.0395	0.0156	0.0126667	0.00383333	-0.0473333	0.0133333	-0.00283333												-0.49		0.00983333	-0.0218333	-0.088	-0.00933333	0.02	-0.013	0.03				-0.49		-0.0506667	-0.0158333	-0.13975	0.0523333	-0.011
-0.48		0.0116667	-0.0045	0.0616667	0.0341667	-0.0121667	-0.0301667	-0.00383333			-0.48		-0.0395	0.0156	0.0126667	-0.0295	-0.0473333	-0.0533333	-0.00283333												-0.48		0.0765	0.0115	0.112	0.190667	-0.0133333	0.0203333	-0.0134783				-0.48		0.0826667	0.0508333	0.11025	0.119	-0.011
-0.47		-0.0216667	-0.0045	0.095	-0.0325	0.0545	0.0698333	-0.00383333			-0.47		-0.0395	0.0156	0.046	0.0705	0.0526667	-0.0533333	-0.00283333												-0.47		-0.0568333	0.0448333	-0.188	-0.109333	-0.0133333	0.0203333	-0.0134783				-0.47		0.016	-0.0158333	-0.13975	-0.081	0.0556667
-0.46		-0.0216667	-0.0045	-0.0383333	-0.0325	-0.0121667	-0.0301667	-0.00383333			-0.46		-0.00616667	-0.0244	0.0126667	0.00383333	0.119333	0.113333	-0.00283333												-0.46		0.0431667	-0.0218333	0.012	-0.076	-0.0133333	-0.013	-0.0134783				-0.46		0.016	0.0175	-0.08975	-0.0476667	0.0223333
-0.45		0.0116667	-0.0045	-0.005	0.00083333	0.0878333	-0.0301667	-0.00383333			-0.45		-0.00616667	0.0356	-0.0206667	-0.0295	-0.0473333	0.0466667	-0.00283333												-0.45		0.00983333	-0.0218333	0.062	-0.0426667	-0.0133333	-0.013	-0.0134783				-0.45		-0.0173333	-0.0158333	0.16025	0.019	-0.011
-0.44		-0.0216667	-0.0045	-0.005	0.0341667	0.0878333	-0.0301667	-0.00383333			-0.44		0.0271667	0.0356	0.0126667	-0.0295	-0.0473333	0.0466667	0.0305												-0.44		-0.0568333	-0.0218333	0.012	0.024	-0.0133333	-0.013	-0.0134783				-0.44		0.0493333	-0.0158333	-0.08975	0.019	-0.011
-0.43		-0.0216667	-0.0045	0.0616667	-0.0325	0.0878333	0.0365	-0.00383333			-0.43		-0.0395	0.0156	-0.0206667	-0.0295	0.0193333	0.0133333	-0.00283333												-0.43		0.00983333	-0.0218333	-0.138	-0.0426667	-0.0133333	0.0203333	-0.0134783				-0.43		0.0826667	0.0175	0.01025	0.0523333	0.0223333
-0.42		-0.0216667	-0.0045	-0.005	-0.0325	-0.0455	0.00316667	-0.00383333			-0.42		-0.0395	-0.0044	0.0126667	-0.0295	-0.0473333	0.0133333	-0.00283333												-0.42		0.143167	-0.0218333	-0.088	-0.0426667	-0.0133333	-0.013	-0.0134783				-0.42		0.0826667	-0.0158333	0.11025	-0.147667	0.0556667
-0.41		-0.0216667	-0.0045	-0.0383333	-0.0325	0.0545	0.0365	-0.00383333			-0.41		-0.0395	-0.0044	-0.0206667	-0.0295	-0.0473333	0.0466667	-0.00283333												-0.41		0.00983333	0.0448333	0.012	-0.00933333	-0.0133333	-0.013	-0.0134783				-0.41		0.149333	-0.0158333	-0.08975	-0.0476667	0.0223333
-0.4		0.0116667	0.0355	0.0616667	0.00083333	0.0878333	0.103167	-0.00383333			-0.4		-0.0395	0.0156	0.0126667	0.0705	-0.0473333	0.0466667	-0.00283333												-0.4		0.0431667	0.0115	-0.138	-0.00933333	-0.0133333	-0.013	-0.0134783				-0.4		0.016	-0.0158333	0.06025	0.0523333	-0.011
-0.39		-0.0216667	-0.0045	-0.005	0.00083333	0.0211667	-0.0301667	-0.00383333			-0.39		-0.0395	-0.0244	0.0126667	0.00383333	-0.0473333	-0.02	-0.00283333												-0.39		0.0765	0.0115	0.062	0.024	-0.0133333	-0.013	0.03				-0.39		0.0493333	0.0175	0.01025	-0.0143333	-0.011
-0.38		-0.0216667	0.0355	-0.005	0.00083333	0.0211667	-0.0301667	-0.00383333			-0.38		0.0605	-0.0044	0.0126667	-0.0295	-0.0473333	-0.02	-0.00283333												-0.38		-0.0235	-0.0218333	-0.138	0.0573333	-0.0133333	-0.013	-0.0134783				-0.38		0.016	-0.0158333	0.01025	-0.0143333	0.0556667
-0.37		-0.0216667	-0.0045	0.0616667	-0.0325	0.0211667	0.0698333	-0.00383333			-0.37		-0.0395	-0.0044	0.0126667	-0.0295	-0.0473333	-0.02	-0.00283333												-0.37		0.143167	-0.0218333	-0.088	-0.0426667	0.02	0.087	0.03				-0.37		-0.0173333	-0.0158333	0.11025	-0.081	-0.011
-0.36		0.0116667	-0.0045	0.0283333	0.0341667	-0.0455	0.0365	-0.00383333			-0.36		-0.0395	0.0156	-0.0206667	-0.0295	0.119333	-0.0533333	-0.00283333												-0.36		-0.0235	0.0448333	-0.038	-0.076	-0.0133333	-0.013	0.03				-0.36		0.116	-0.0158333	0.26025	-0.0476667	0.0223333
-0.35		-0.0216667	-0.0045	-0.005	-0.0325	-0.0455	-0.0301667	-0.00383333			-0.35		0.0271667	0.0356	-0.0206667	0.00383333	0.0193333	0.0466667	0.0305												-0.35		-0.0235	-0.0218333	0.012	0.024	-0.0133333	-0.013	-0.0134783				-0.35		0.0493333	0.0841667	-0.28975	-0.0143333	0.0223333
-0.34		-0.0216667	0.0355	-0.0383333	-0.0325	0.0211667	-0.0301667	-0.00383333			-0.34		-0.0395	-0.0044	-0.0206667	-0.0295	0.0193333	0.0133333	-0.00283333												-0.34		0.1765	0.0115	0.062	-0.00933333	-0.0133333	0.0203333	-0.0134783				-0.34		-0.0173333	-0.0158333	0.16025	0.0856667	0.0223333
-0.33		0.0116667	0.0155	-0.005	-0.0325	-0.0121667	0.0698333	-0.00383333			-0.33		-0.00616667	-0.0044	-0.0206667	0.00383333	-0.0473333	-0.0533333	-0.00283333												-0.33		-0.0235	-0.0218333	0.112	0.024	-0.0133333	-0.013	-0.0134783				-0.33		0.016	-0.0158333	-0.18975	0.0523333	-0.011
-0.32		-0.0216667	-0.0045	-0.0383333	-0.0325	0.121167	0.00316667	-0.00383333			-0.32		0.0271667	-0.0044	0.0126667	0.0371667	-0.0473333	-0.0533333	-0.00283333												-0.32		0.00983333	-0.0218333	-0.238	0.024	0.02	-0.013	-0.0134783				-0.32		-0.0173333	0.0175	0.06025	-0.081	-0.011
-0.31		0.0116667	-0.0045	-0.005	-0.0325	0.0545	-0.0301667	-0.00383333			-0.31		-0.0395	-0.0244	-0.0206667	0.0371667	-0.0473333	-0.02	-0.00283333												-0.31		0.0765	-0.0218333	0.012	-0.00933333	0.02	-0.013	-0.0134783				-0.31		0.016	-0.0158333	-0.13975	-0.0476667	-0.011
-0.3		0.0116667	-0.0045	0.0283333	-0.0325	-0.0121667	-0.0301667	-0.00383333			-0.3		-0.0395	0.0156	-0.0206667	0.00383333	-0.0473333	-0.02	-0.00283333												-0.3		-0.0235	-0.0218333	0.012	-0.00933333	-0.0133333	-0.013	-0.0134783				-0.3		0.016	0.0175	-0.08975	-0.0143333	-0.011
-0.29		-0.0216667	0.0155	-0.005	-0.0325	-0.0455	-0.0301667	0.0295			-0.29		-0.00616667	-0.0044	-0.0206667	0.0371667	-0.0473333	-0.0533333	-0.00283333												-0.29		-0.0235	0.0115	-0.088	0.024	-0.0133333	-0.013	-0.0134783				-0.29		0.0493333	-0.0158333	0.11025	-0.0143333	-0.011
-0.28		-0.0216667	-0.0045	0.0283333	-0.0325	-0.0455	-0.0301667	-0.00383333			-0.28		0.0271667	-0.0244	0.0126667	0.0371667	-0.0473333	0.0466667	-0.00283333												-0.28		0.0765	0.0115	0.212	-0.00933333	-0.0133333	-0.013	-0.0134783				-0.28		-0.0173333	-0.0158333	-0.18975	-0.0143333	-0.011
-0.27		-0.0216667	-0.0045	-0.005	-0.0325	-0.0455	-0.0301667	-0.00383333			-0.27		0.0271667	0.0356	-0.0206667	-0.0295	-0.0473333	0.0466667	-0.00283333												-0.27		-0.0568333	-0.0218333	-0.188	0.124	0.02	-0.013	0.03				-0.27		0.0493333	-0.0158333	0.06025	-0.081	-0.011
-0.26		0.0116667	-0.0045	0.0283333	-0.0325	-0.0455	0.1365	-0.00383333			-0.26		0.0271667	-0.0044	-0.0206667	-0.0295	-0.014	0.0133333	-0.00283333												-0.26		0.0431667	-0.0218333	-0.038	-0.0426667	0.02	0.0203333	-0.0134783				-0.26		-0.0173333	0.0175	0.16025	0.019	-0.011
-0.25		-0.0216667	-0.0045	0.0283333	-0.0325	-0.0455	0.00316667	-0.00383333			-0.25		-0.00616667	0.0156	0.0126667	-0.0295	-0.014	-0.0533333	-0.00283333												-0.25		-0.0568333	0.0115	-0.138	0.0573333	-0.0133333	-0.013	0.03				-0.25		0.0826667	0.0175	-0.18975	0.119	-0.011
-0.24		0.045	-0.0045	-0.005	-0.0325	0.0211667	-0.0301667	-0.00383333			-0.24		-0.00616667	-0.0244	0.046	-0.0295	-0.014	-0.0533333	-0.00283333												-0.24		-0.0235	-0.0218333	-0.088	-0.076	0.02	-0.013	-0.0134783				-0.24		-0.0506667	0.0175	-0.08975	-0.081	-0.011
-0.23		0.0116667	-0.0045	-0.005	0.00083333	0.0545	-0.0301667	-0.00383333			-0.23		-0.0395	0.0156	0.0126667	0.0371667	-0.0473333	-0.0533333	-0.00283333												-0.23		0.00983333	0.0115	0.012	0.0906667	0.0533333	-0.013	0.03				-0.23		0.0493333	-0.0158333	-0.03975	0.019	-0.011
-0.22		0.111667	-0.0045	0.0283333	-0.0325	0.0211667	-0.0301667	-0.00383333			-0.22		-0.00616667	0.0356	0.046	0.00383333	-0.0473333	0.0133333	-0.00283333												-0.22		-0.0235	-0.0218333	0.062	-0.109333	0.0533333	0.0203333	-0.0134783				-0.22		-0.0173333	-0.0158333	0.11025	0.019	-0.011
-0.21		0.0116667	-0.0045	-0.005	-0.0325	-0.0121667	0.00316667	-0.00383333			-0.21		0.0271667	-0.0244	-0.0206667	0.00383333	-0.0473333	0.0466667	-0.00283333												-0.21		0.00983333	0.0115	0.062	-0.00933333	0.0866667	-0.013	0.03				-0.21		-0.0506667	-0.0158333	-0.08975	0.0856667	-0.011
-0.2		-0.0216667	0.0355	-0.005	-0.0325	-0.0121667	0.00316667	-0.00383333			-0.2		-0.0395	-0.0244	-0.0206667	-0.0295	-0.0473333	-0.0533333	-0.00283333												-0.2		-0.0235	0.0115	-0.088	-0.0426667	-0.0133333	-0.013	0.03				-0.2		0.0826667	-0.0158333	-0.03975	-0.114333	-0.011
-0.19		0.0116667	-0.0045	-0.0383333	-0.0325	-0.0455	-0.0301667	-0.00383333			-0.19		-0.0395	-0.0044	0.0126667	-0.0295	-0.0473333	-0.0533333	-0.00283333												-0.19		0.0431667	0.0115	0.062	-0.00933333	-0.0133333	0.0203333	0.03				-0.19		0.016	-0.0158333	0.06025	-0.0476667	-0.011
-0.18		-0.0216667	-0.0045	-0.005	-0.0325	0.0545	-0.0301667	-0.00383333			-0.18		0.0271667	0.0156	-0.0206667	0.0705	-0.014	0.08	-0.00283333												-0.18		-0.0235	-0.0218333	0.112	-0.0426667	-0.0133333	-0.013	-0.0134783				-0.18		0.0826667	-0.0158333	0.06025	-0.081	-0.011
-0.17		0.0116667	-0.0045	-0.005	-0.0325	0.0545	0.00316667	-0.00383333			-0.17		-0.00616667	-0.0044	-0.0206667	0.137167	0.086	0.0133333	-0.00283333												-0.17		0.00983333	0.0115	-0.038	-0.0426667	-0.0133333	-0.013	0.03				-0.17		-0.0173333	0.0175	0.16025	0.0523333	-0.011
-0.16		-0.0216667	-0.0045	-0.0383333	0.0341667	0.0878333	0.0365	-0.00383333			-0.16		0.0271667	-0.0044	-0.0206667	-0.0295	0.086	-0.0533333	-0.00283333												-0.16		-0.0235	-0.0218333	-0.088	-0.076	-0.0133333	-0.013	0.0734783				-0.16		-0.0506667	0.0175	-0.28975	0.019	-0.011
-0.15		0.0116667	-0.0045	0.095	0.0341667	0.0545	0.00316667	-0.00383333			-0.15		-0.00616667	-0.0044	0.0793333	-0.0295	0.0193333	-0.0533333	-0.00283333												-0.15		0.0431667	-0.0218333	0.012	-0.00933333	-0.0133333	0.0536667	-0.0134783				-0.15		0.016	-0.0158333	0.06025	-0.081	0.0223333
-0.14		0.045	-0.0045	0.0283333	0.00083333	-0.0455	0.0365	-0.00383333			-0.14		-0.0395	0.0356	0.046	0.00383333	0.0526667	0.0133333	-0.00283333												-0.14		-0.0568333	-0.0218333	0.012	0.024	-0.0133333	-0.013	-0.0134783				-0.14		0.016	0.0175	0.06025	-0.0143333	0.0223333
-0.13		-0.0216667	-0.0045	-0.005	0.00083333	-0.0455	-0.0301667	-0.00383333			-0.13		-0.0395	0.0356	0.0126667	-0.0295	0.0526667	-0.02	-0.00283333												-0.13		-0.0235	0.0115	0.062	0.024	-0.0133333	-0.013	-0.0134783				-0.13		0.016	-0.0158333	0.26025	0.019	-0.011
-0.12		0.045	-0.0045	0.0283333	0.00083333	-0.0121667	-0.0301667	-0.00383333			-0.12		-0.0395	-0.0244	0.0126667	-0.0295	-0.0473333	0.0133333	-0.00283333												-0.12		-0.0568333	0.0115	-0.038	0.0573333	0.02	-0.013	-0.0134783				-0.12		-0.0173333	-0.0158333	-0.13975	0.0523333	-0.011
-0.11		-0.0216667	0.0355	-0.005	0.100833	-0.0121667	0.103167	-0.00383333			-0.11		-0.00616667	-0.0044	-0.0206667	-0.0295	-0.0473333	0.0466667	-0.00283333												-0.11		0.00983333	-0.0218333	-0.138	0.0573333	-0.0133333	-0.013	-0.0134783				-0.11		0.016	-0.0158333	0.11025	0.0856667	-0.011
-0.1		0.0116667	-0.0045	-0.0383333	0.0675	0.0211667	0.00316667	-0.00383333			-0.1		0.0271667	0.0156	-0.0206667	-0.0295	0.0193333	-0.0533333	-0.00283333												-0.1		-0.0568333	0.0448333	0.012	-0.0426667	-0.0133333	-0.013	-0.0134783				-0.1		-0.0173333	-0.0158333	0.26025	-0.0143333	-0.011
-0.09		0.0116667	0.0155	-0.0383333	0.0341667	-0.0455	0.103167	-0.00383333			-0.09		-0.0395	-0.0044	0.0126667	-0.0295	0.0193333	-0.0533333	-0.00283333												-0.09		-0.0235	0.0448333	0.012	0.0573333	-0.0133333	-0.013	-0.0134783				-0.09		0.0493333	-0.0158333	-0.28975	-0.114333	-0.011
-0.08		0.0116667	-0.0045	-0.005	0.0341667	-0.0121667	0.0365	-0.00383333			-0.08		-0.0395	0.0156	-0.0206667	-0.0295	0.119333	-0.0533333	-0.00283333												-0.08		-0.0235	-0.0218333	0.162	-0.0426667	0.02	-0.013	0.03				-0.08		0.016	-0.0158333	0.06025	-0.0143333	-0.011
-0.07		-0.0216667	-0.0045	0.0283333	0.100833	-0.0455	0.0698333	-0.00383333			-0.07		-0.00616667	0.0156	-0.0206667	0.0371667	0.119333	-0.0533333	-0.00283333												-0.07		0.109833	0.0448333	0.112	0.124	0.02	0.0203333	-0.0134783				-0.07		0.016	0.0175	-0.28975	-0.0143333	-0.011
-0.06		-0.0216667	-0.0045	-0.005	-0.0325	0.0545	0.00316667	-0.00383333			-0.06		-0.00616667	-0.0044	0.0126667	0.0371667	-0.0473333	0.08	-0.00283333												-0.06		-0.0235	-0.0218333	-0.188	-0.142667	-0.0133333	0.0536667	-0.0134783				-0.06		-0.0173333	0.0175	0.16025	0.019	-0.011
-0.05		0.0116667	-0.0045	-0.0383333	0.00083333	-0.0121667	-0.0301667	-0.00383333			-0.05		-0.00616667	-0.0044	0.046	-0.0295	-0.0473333	0.08	-0.00283333												-0.05		0.109833	-0.0218333	-0.038	0.0906667	-0.0133333	-0.013	0.03				-0.05		-0.0506667	-0.0158333	-0.13975	0.019	-0.011
-0.04		-0.0216667	-0.0045	0.095	0.00083333	-0.0455	-0.0301667	-0.00383333			-0.04		-0.0395	-0.0244	-0.0206667	-0.0295	0.0193333	0.113333	0.0305												-0.04		-0.0235	-0.0218333	-0.088	-0.00933333	0.02	-0.013	-0.0134783				-0.04		-0.0173333	-0.0158333	0.11025	-0.0143333	-0.011
-0.03		0.0116667	-0.0045	-0.005	0.100833	-0.0455	-0.0301667	-0.00383333			-0.03		-0.0395	-0.0044	0.0126667	0.0371667	-0.0473333	0.0133333	-0.00283333												-0.03		0.0431667	0.0448333	-0.088	-0.00933333	-0.0133333	-0.013	-0.0134783				-0.03		-0.0173333	-0.0158333	0.01025	0.0856667	-0.011
-0.02		0.045	-0.0045	-0.0383333	0.0341667	-0.0455	-0.0301667	0.0295			-0.02		-0.00616667	-0.0044	0.0126667	0.0371667	-0.0473333	0.0133333	-0.00283333												-0.02		0.0765	-0.0218333	-0.038	0.024	-0.0133333	-0.013	-0.0134783				-0.02		0.016	-0.0158333	0.11025	-0.0476667	-0.011
-0.01		-0.0216667	-0.0045	-0.0383333	0.00083333	-0.0121667	-0.0301667	-0.00383333			-0.01		-0.00616667	0.0556	-0.0206667	-0.0295	-0.014	-0.0533333	-0.00283333												-0.01		0.0431667	-0.0218333	-0.088	-0.0426667	0.02	-0.013	-0.0134783				-0.01		-0.0173333	-0.0158333	-0.13975	-0.0476667	-0.011
0		0.0116667	-0.0045	0.095	0.00083333	-0.0121667	-0.0301667	-0.00383333			0		-0.0395	-0.0244	0.0126667	-0.0295	-0.0473333	0.0133333	-0.00283333												0		0.0765	-0.0218333	-0.088	-0.076	-0.0133333	-0.013	-0.0134783				0		0.816	0.0175	0.11025	-0.081	-0.011
0.01		-0.0216667	-0.0045	-0.0383333	-0.0325	0.1545	-0.0301667	-0.00383333			0.01		-0.00616667	-0.0244	0.0126667	0.00383333	0.086	0.146667	-0.00283333												0.01		1.0765	-0.0218333	0.212	0.0906667	-0.0133333	0.0536667	0.116957				0.01		0.582667	0.0175	0.11025	0.019	-0.011
0.02		0.0116667	-0.0045	0.0283333	0.0675	0.0211667	-0.0301667	-0.00383333			0.02		-0.0395	0.0356	0.046	0.203833	0.0526667	-0.02	-0.00283333												0.02		0.7765	-0.0218333	0.512	0.190667	-0.0133333	0.0203333	0.0734783				0.02		0.549333	0.0175	0.11025	0.019	-0.011
0.03		0.0116667	0.0355	0.128333	-0.0325	-0.0121667	-0.0301667	0.0295			0.03		-0.0395	-0.0044	0.0126667	0.503833	0.0193333	-0.0533333	-0.00283333												0.03		0.6765	0.0448333	0.812	0.257333	-0.0133333	0.0536667	-0.0134783				0.03		0.216	-0.0158333	0.31025	0.119	-0.011
0.04		0.045	0.0755	0.328333	0.0675	-0.0121667	0.00316667	-0.00383333			0.04		-0.0395	0.0556	0.346	0.1705	0.0193333	-0.0533333	-0.00283333												0.04		0.1765	-0.0218333	0.862	0.324	0.02	0.0536667	-0.0134783				0.04		0.116	-0.0158333	0.66025	-0.0143333	-0.011
0.05		-0.0216667	0.0755	0.161667	0.1675	0.121167	0.0698333	-0.00383333			0.05		0.0271667	0.0356	0.146	0.203833	-0.0473333	-0.0533333	-0.00283333												0.05		0.209833	-0.0218333	1.062	0.424	0.0533333	-0.013	-0.0134783				0.05		-0.0173333	-0.0158333	0.31025	0.0856667	0.0556667
0.06		0.0783333	0.0755	0.0283333	0.134167	0.0211667	-0.0301667	-0.00383333			0.06		0.1605	0.0556	0.046	0.137167	-0.0473333	-0.02	-0.00283333												0.06		0.243167	0.0781667	1.162	0.357333	0.02	-0.013	0.160435				0.06		-0.0173333	-0.0158333	-0.08975	0.019	0.0223333
0.07		0.0116667	0.0755	0.0616667	0.200833	-0.0455	-0.0301667	-0.00383333			0.07		0.427167	0.0356	0.112667	0.203833	0.0193333	-0.02	-0.00283333												0.07		0.0765	-0.0218333	0.712	0.357333	0.12	-0.013	0.0734783				0.07		0.116	0.0175	0.11025	-0.081	0.0223333
0.08		0.045	0.0155	0.095	0.00083333	-0.0121667	0.00316667	-0.00383333			0.08		0.1605	0.0356	0.046	0.0371667	-0.014	0.0466667	0.0305												0.08		0.0431667	0.0448333	0.912	0.390667	0.253333	-0.013	0.160435				0.08		-0.0506667	0.0175	0.06025	-0.0143333	0.089
0.09		0.045	0.0555	0.0616667	0.0675	0.0211667	0.103167	0.0628333			0.09		0.327167	0.0556	0.146	0.203833	0.0526667	0.0466667	0.0305												0.09		0.0431667	0.0448333	0.762	0.390667	0.22	0.087	0.203913				0.09		-0.0173333	0.0508333	-0.18975	0.0523333	0.122333
0.1		0.111667	0.0555	0.195	0.100833	0.0545	0.3365	0.1295			0.1		0.327167	0.0556	0.0793333	0.1705	0.119333	0.113333	0.0638333												0.1		0.0765	0.0115	0.862	0.157333	0.12	0.087	0.0734783				0.1		0.0826667	-0.0158333	-0.03975	0.0523333	0.222333
0.11		0.045	0.0555	-0.0383333	0.134167	-0.0121667	0.203167	0.0961667			0.11		0.327167	0.0356	0.0793333	0.0705	0.219333	0.08	0.0638333												0.11		0.00983333	0.0781667	0.612	0.390667	0.0533333	0.0203333	0.03				0.11		0.016	0.0175	-0.13975	0.019	0.155667
0.12		0.145	0.0955	0.095	0.00083333	-0.0121667	0.269833	0.0628333			0.12		0.4605	-0.0044	0.046	0.0371667	0.319333	0.313333	0.0638333												0.12		0.00983333	-0.0218333	0.462	0.257333	0.0866667	0.0536667	0.160435				0.12		0.0493333	0.0175	-0.13975	-0.081	0.0223333
0.13		0.0116667	0.0555	0.0616667	0.00083333	0.0878333	0.169833	0.0961667			0.13		0.293833	0.0556	0.112667	0.0705	0.152667	0.18	0.1305												0.13		0.109833	0.0781667	0.612	0.157333	0.153333	0.0203333	0.116957				0.13		0.0826667	-0.0158333	-0.23975	-0.0143333	0.0223333
0.14		0.145	0.0555	0.0283333	0.00083333	0.387833	0.203167	0.0628333			0.14		0.3605	0.0756	0.0793333	0.0705	0.219333	0.113333	0.0305												0.14		0.0765	0.0781667	0.462	0.124	0.0533333	0.0203333	0.03				0.14		0.0493333	0.0508333	-0.28975	0.0856667	-0.011
0.15		0.0783333	0.0155	0.0283333	-0.0325	0.387833	0.303167	0.0961667			0.15		0.193833	0.0356	0.112667	0.0705	0.219333	0.113333	0.163833												0.15		0.109833	0.0448333	0.462	0.290667	0.0866667	0.0536667	0.03				0.15		0.116	-0.0158333	-0.28975	-0.147667	-0.011
0.16		0.145	-0.0045	0.095	0.0341667	0.0878333	0.269833	0.0628333			0.16		0.2605	0.0156	0.112667	0.137167	0.352667	0.18	0.0971667												0.16		0.1765	0.0781667	0.362	0.157333	0.02	0.0536667	-0.0134783				0.16		0.0826667	0.0508333	-0.23975	0.119	-0.011
0.17		0.178333	0.0155	0.161667	0.0341667	0.387833	0.1365	0.162833			0.17		0.2605	0.0356	0.0793333	0.0705	0.152667	0.0133333	0.0305												0.17		0.1765	0.0781667	0.462	0.124	0.12	-0.013	0.03				0.17		0.0493333	0.0175	-0.13975	-0.0476667	-0.011
0.18		0.111667	0.0155	0.095	0.0675	0.121167	0.169833	0.196167			0.18		0.293833	0.0556	0.212667	0.0371667	0.0526667	0.146667	0.0305												0.18		0.2765	0.0115	0.062	0.157333	0.0533333	0.0536667	-0.0134783				0.18		0.116	0.0175	-0.28975	0.019	-0.011
0.19		0.178333	-0.0045	-0.005	0.00083333	0.0545	0.169833	0.0961667			0.19		0.3605	0.0156	0.0793333	0.0371667	0.219333	0.0466667	-0.00283333												0.19		0.243167	0.0448333	0.362	0.157333	0.02	0.0203333	-0.0134783				0.19		0.116	0.0508333	-0.13975	-0.0476667	-0.011
0.2		0.178333	-0.0045	-0.005	0.0675	0.0878333	0.00316667	-0.00383333			0.2		0.393833	0.0556	0.0126667	0.137167	0.152667	0.246667	-0.00283333												0.2		0.309833	0.0448333	0.212	0.024	0.02	0.0203333	0.03				0.2		0.249333	0.0508333	-0.28975	0.019	0.0223333
0.21		0.111667	0.0155	-0.005	0.00083333	0.1545	0.0698333	0.0295			0.21		0.327167	-0.0044	0.046	0.137167	0.219333	0.08	0.0305												0.21		0.1765	0.0448333	0.412	0.157333	-0.0133333	0.153667	-0.0134783				0.21		0.149333	0.0508333	-0.03975	-0.0476667	0.0223333
0.22		0.178333	-0.0045	0.095	0.0341667	0.0545	0.3365	-0.00383333			0.22		0.327167	0.0756	0.112667	0.203833	0.0526667	0.0466667	-0.00283333												0.22		0.243167	0.0781667	0.362	0.190667	0.02	0.0203333	-0.0134783				0.22		0.149333	0.0508333	-0.13975	0.019	-0.011
0.23		0.0116667	-0.0045	0.0616667	-0.0325	0.0878333	0.103167	-0.00383333			0.23		0.227167	-0.0044	0.046	0.0705	0.119333	0.0133333	0.0305												0.23		0.209833	0.144833	0.112	0.224	0.12	0.153667	-0.0134783				0.23		0.0826667	-0.0158333	-0.08975	-0.0143333	-0.011
0.24		0.145	0.0155	-0.005	0.00083333	0.0545	0.0698333	0.0295			0.24		0.3605	-0.0044	0.0793333	0.00383333	0.0526667	0.0466667	-0.00283333												0.24		0.2765	0.1115	0.412	0.190667	0.02	0.0203333	0.0734783				0.24		0.182667	0.0175	-0.28975	-0.114333	0.0556667
0.25		0.0783333	-0.0045	0.0616667	0.00083333	-0.0455	0.0698333	0.0295			0.25		0.327167	-0.0044	0.046	0.0371667	0.0193333	0.0133333	0.0638333												0.25		0.409833	-0.0218333	0.362	0.157333	0.0533333	0.0203333	-0.0134783				0.25		0.182667	-0.0158333	-0.23975	0.019	0.0223333
0.26		0.211667	0.0155	-0.005	0.0341667	-0.0121667	0.203167	0.0295			0.26		0.2605	0.0156	0.0126667	0.0371667	-0.0473333	0.146667	0.0305												0.26		0.143167	0.0781667	0.312	0.324	-0.0133333	0.087	0.116957				0.26		0.216	-0.0158333	-0.13975	-0.0143333	0.0223333
0.27		-0.0216667	-0.0045	-0.005	0.00083333	-0.0455	0.103167	-0.00383333			0.27		0.3605	0.0356	0.0126667	0.0371667	-0.0473333	0.18	0.0638333												0.27		0.2765	0.0448333	0.412	0.124	0.02	-0.013	0.0734783				0.27		0.149333	0.0508333	0.06025	-0.0476667	-0.011
0.28		0.0783333	-0.0045	0.0283333	0.00083333	-0.0121667	-0.0301667	0.0628333			0.28		0.227167	-0.0044	-0.0206667	0.0371667	-0.014	-0.02	0.0305												0.28		0.143167	0.0781667	0.212	0.0906667	-0.0133333	-0.013	0.116957				0.28		0.216	0.0508333	0.06025	-0.0476667	-0.011
0.29		0.0783333	0.0155	-0.005	-0.0325	-0.0121667	0.00316667	-0.00383333			0.29		0.1605	-0.0044	-0.0206667	0.0705	-0.0473333	0.0133333	-0.00283333												0.29		0.143167	0.0448333	0.412	0.157333	-0.0133333	-0.013	0.03				0.29		0.0826667	0.0508333	-0.08975	-0.0476667	-0.011
0.3		0.0116667	0.0155	0.0283333	-0.0325	0.0211667	0.103167	0.0295			0.3		0.2605	0.0356	0.046	0.103833	-0.0473333	0.0466667	0.0305												0.3		0.2765	0.0115	0.312	0.0573333	-0.0133333	0.0536667	0.0734783				0.3		0.282667	0.0175	-0.03975	0.0856667	-0.011
0.31		0.145	-0.0045	-0.0383333	-0.0325	-0.0455	-0.0301667	0.0295			0.31		0.193833	-0.0044	0.046	0.0705	-0.0473333	0.08	-0.00283333												0.31		0.1765	0.0115	0.212	0.0906667	0.0533333	-0.013	0.203913				0.31		0.149333	-0.0158333	0.21025	-0.0143333	0.0223333
0.32		0.111667	-0.0045	0.0616667	-0.0325	-0.0121667	-0.0301667	0.0295			0.32		0.393833	-0.0244	-0.0206667	0.0705	-0.0473333	0.0133333	0.0305												0.32		0.243167	0.0115	0.062	0.157333	-0.0133333	0.0203333	0.116957				0.32		0.149333	-0.0158333	0.01025	-0.114333	-0.011
0.33		0.0116667	-0.0045	-0.0383333	-0.0325	-0.0455	-0.0301667	0.0295			0.33		0.127167	0.0156	0.0126667	0.00383333	-0.0473333	-0.02	0.0305												0.33		0.309833	0.0448333	0.512	0.190667	0.0866667	-0.013	-0.0134783				0.33		0.0826667	-0.0158333	-0.08975	-0.081	-0.011
0.34		0.0116667	-0.0045	-0.0383333	0.0341667	-0.0455	-0.0301667	0.0295			0.34		0.227167	-0.0044	-0.0206667	-0.0295	-0.0473333	-0.02	0.0305												0.34		0.209833	0.0448333	0.162	0.0906667	0.0533333	0.0203333	-0.0134783				0.34		0.282667	0.0175	-0.03975	-0.181	0.0556667
0.35		0.111667	-0.0045	-0.005	0.00083333	-0.0455	-0.0301667	0.0628333			0.35		0.227167	-0.0044	-0.0206667	-0.0295	-0.0473333	-0.02	-0.00283333												0.35		0.343167	0.0781667	0.462	0.157333	-0.0133333	-0.013	-0.0134783				0.35		0.149333	-0.0158333	0.11025	0.0856667	0.0223333
0.36		0.111667	-0.0045	-0.005	0.00083333	-0.0121667	-0.0301667	-0.00383333			0.36		0.2605	0.0556	-0.0206667	-0.0295	-0.0473333	0.0133333	-0.00283333												0.36		0.209833	0.0448333	0.212	0.190667	0.0533333	0.0536667	-0.0134783				0.36		0.282667	-0.0158333	-0.18975	0.0523333	0.0223333
0.37		-0.0216667	-0.0045	-0.0383333	-0.0325	-0.0455	0.00316667	-0.00383333			0.37		0.327167	-0.0044	-0.0206667	0.00383333	-0.0473333	-0.0533333	-0.00283333												0.37		0.209833	0.0781667	0.412	0.157333	0.0533333	0.0203333	0.0734783				0.37		0.216	0.0508333	0.21025	-0.0143333	0.0223333
0.38		0.111667	-0.0045	-0.005	0.00083333	-0.0455	0.00316667	-0.00383333			0.38		0.2605	-0.0044	-0.0206667	-0.0295	-0.0473333	-0.02	0.0305												0.38		0.2765	0.0115	0.362	0.124	0.0533333	0.0203333	0.03				0.38		0.182667	0.0841667	-0.08975	-0.114333	-0.011
0.39		0.045	0.0155	-0.005	-0.0325	-0.0121667	-0.0301667	-0.00383333			0.39		0.1605	0.0156	0.0126667	0.103833	-0.014	-0.02	-0.00283333												0.39		0.1765	0.0115	0.362	-0.00933333	0.02	-0.013	0.03				0.39		0.116	-0.0158333	-0.23975	-0.081	0.0556667
0.4		0.0116667	-0.0045	0.0283333	-0.0325	-0.0455	-0.0301667	-0.00383333			0.4		0.1605	0.0356	0.112667	0.0705	-0.0473333	-0.0533333	0.0305												0.4		0.143167	-0.0218333	0.412	0.157333	-0.0133333	-0.013	0.03				0.4		0.116	-0.0158333	0.26025	-0.181	-0.011
0.41		0.0116667	-0.0045	-0.0383333	-0.0325	-0.0455	-0.0301667	0.0628333			0.41		0.1605	0.0356	0.046	0.00383333	-0.014	0.0133333	0.0305												0.41		0.3765	0.144833	0.212	0.190667	0.02	0.0203333	0.116957				0.41		0.216	-0.0158333	-0.03975	-0.081	0.0556667
0.42		-0.0216667	-0.0045	-0.0383333	0.00083333	-0.0121667	-0.0301667	0.0961667			0.42		0.227167	0.0356	-0.0206667	-0.0295	-0.0473333	0.0133333	0.0638333												0.42		0.209833	0.0448333	0.462	0.0906667	0.0533333	0.0536667	-0.0134783				0.42		0.116	-0.0158333	0.06025	-0.0143333	-0.011
0.43		0.0116667	-0.0045	-0.0383333	-0.0325	-0.0121667	-0.0301667	0.0295			0.43		0.2605	-0.0244	-0.0206667	0.103833	-0.0473333	0.0133333	-0.00283333												0.43		0.143167	0.0781667	0.362	0.157333	0.0533333	0.0536667	0.0734783				0.43		0.249333	-0.0158333	-0.03975	0.152333	0.0223333
0.44		-0.0216667	-0.0045	-0.005	-0.0325	-0.0455	-0.0301667	0.0295			0.44		0.227167	0.0156	-0.0206667	0.0705	-0.0473333	-0.02	-0.00283333												0.44		0.109833	0.0115	0.262	0.157333	0.0866667	-0.013	0.116957				0.44		0.182667	0.0841667	0.01025	-0.0476667	-0.011
0.45		-0.0216667	-0.0045	-0.005	0.00083333	-0.0455	-0.0301667	-0.00383333			0.45		0.1605	0.0356	0.046	0.00383333	-0.0473333	-0.0533333	0.0305												0.45		0.209833	0.0448333	0.362	0.124	0.02	-0.013	0.03				0.45		0.116	0.0508333	-0.03975	-0.0476667	0.0556667
0.46		0.045	-0.0045	-0.0383333	0.00083333	-0.0455	-0.0301667	-0.00383333			0.46		0.193833	-0.0044	0.0126667	-0.0295	-0.0473333	-0.0533333	-0.00283333												0.46		0.2765	0.0781667	0.212	0.124	-0.0133333	0.0203333	0.160435				0.46		0.0493333	0.0508333	-0.03975	-0.114333	-0.011
0.47		0.0116667	-0.0045	0.0283333	-0.0325	-0.0455	-0.0301667	0.0628333			0.47		0.2605	0.0156	0.0126667	0.00383333	-0.0473333	0.113333	0.0638333												0.47		0.109833	0.0781667	0.412	0.0906667	0.0533333	0.0536667	0.03				0.47		0.216	0.0508333	0.01025	0.0523333	-0.011
0.48		0.111667	-0.0045	-0.005	-0.0325	-0.0455	0.0365	0.0295			0.48		0.127167	0.0556	-0.0206667	-0.0295	-0.0473333	-0.02	-0.00283333												0.48		0.109833	0.0448333	0.312	0.124	-0.0133333	-0.013	0.160435				0.48		0.149333	-0.0158333	0.06025	-0.0476667	0.0223333
0.49		0.0116667	-0.0045	-0.005	0.00083333	-0.0455	0.00316667	-0.00383333			0.49		0.0271667	0.0356	-0.0206667	-0.0295	-0.0473333	-0.02	0.0305												0.49		0.143167	0.0448333	0.112	0.024	0.02	-0.013	-0.0134783				0.49		0.116	0.0841667	-0.23975	-0.081	0.0556667
0.5		0.0116667	-0.0045	-0.005	-0.0325	-0.0455	-0.0301667	0.0295			0.5		0.127167	-0.0244	0.0126667	-0.0295	-0.0473333	-0.02	-0.00283333												0.5		0.243167	-0.0218333	0.212	0.024	0.02	0.0203333	-0.0134783				0.5		0.182667	-0.0158333	0.21025	0.019	-0.011
0.51		0.045	-0.0045	0.0616667	0.00083333	-0.0455	-0.0301667	0.0628333			0.51		0.1605	-0.0044	0.0793333	-0.0295	-0.0473333	-0.02	0.0638333												0.51		0.309833	-0.0218333	0.412	0.157333	0.0533333	-0.013	0.0734783				0.51		0.216	0.0841667	0.01025	-0.0143333	0.0556667
0.52		0.0116667	-0.0045	0.0616667	-0.0325	-0.0455	-0.0301667	-0.00383333			0.52		0.0605	-0.0044	0.0793333	-0.0295	-0.0473333	-0.02	0.0305												0.52		0.1765	0.0448333	0.762	-0.00933333	-0.0133333	-0.013	-0.0134783				0.52		0.116	-0.0158333	0.21025	-0.114333	-0.011
0.53		0.0116667	0.0155	-0.005	-0.0325	-0.0455	-0.0301667	0.0628333			0.53		0.0938333	-0.0244	0.0126667	0.0371667	-0.0473333	-0.0533333	-0.00283333												0.53		0.243167	0.0448333	0.362	0.024	-0.0133333	-0.013	-0.0134783				0.53		0.0826667	0.0175	0.11025	-0.114333	-0.011
0.54		0.0116667	-0.0045	0.128333	-0.0325	-0.0455	-0.0301667	0.0295			0.54		0.1605	-0.0044	0.0126667	0.0705	-0.0473333	0.0133333	-0.00283333												0.54		0.209833	0.0781667	0.612	0.0573333	0.02	0.0203333	0.03				0.54		0.016	0.0175	0.31025	-0.0476667	0.0223333
0.55		0.0783333	-0.0045	-0.005	-0.0325	-0.0455	-0.0301667	0.0961667			0.55		0.0605	-0.0044	0.0126667	0.00383333	-0.0473333	-0.02	0.0305												0.55		0.0765	0.0781667	0.612	0.124	0.0533333	-0.013	-0.0134783				0.55		0.0826667	0.0175	0.21025	-0.0476667	-0.011
0.56		-0.0216667	-0.0045	-0.0383333	-0.0325	-0.0455	-0.0301667	0.0295			0.56		0.0938333	0.0156	-0.0206667	0.00383333	-0.0473333	0.0133333	-0.00283333												0.56		0.0765	0.0448333	0.762	0.190667	-0.0133333	-0.013	-0.0134783				0.56		0.182667	-0.0158333	0.16025	-0.0476667	-0.011
0.57		0.0116667	-0.0045	0.0616667	-0.0325	-0.0455	-0.0301667	0.0295			0.57		-0.00616667	-0.0244	0.146	0.00383333	-0.0473333	0.0133333	-0.00283333												0.57		0.0431667	0.0781667	0.562	0.257333	0.02	0.0536667	-0.0134783				0.57		0.149333	-0.0158333	0.01025	-0.081	-0.011
0.58		-0.0216667	-0.0045	0.095	0.00083333	-0.0455	-0.0301667	0.0295			0.58		0.0938333	0.0556	0.046	-0.0295	-0.0473333	-0.02	-0.00283333												0.58		0.1765	0.0781667	0.562	0.157333	0.0533333	-0.013	0.03				0.58		0.149333	-0.0158333	0.11025	-0.0143333	-0.011
0.59		0.0116667	-0.0045	0.0616667	-0.0325	-0.0121667	-0.0301667	0.0628333			0.59		0.0271667	0.0356	-0.0206667	0.00383333	-0.0473333	-0.02	0.0305												0.59		0.0765	0.0448333	0.362	0.257333	0.0533333	-0.013	0.03				0.59		0.0826667	0.0175	0.26025	-0.0143333	-0.011
0.6		0.0116667	-0.0045	-0.005	-0.0325	-0.0121667	-0.0301667	0.0628333			0.6		0.0938333	0.0356	0.0793333	-0.0295	-0.0473333	-0.0533333	0.0305												0.6		0.143167	0.0448333	0.562	0.157333	0.0533333	-0.013	0.116957				0.6		0.0493333	0.0508333	0.01025	-0.147667	-0.011
0.61		0.045	-0.0045	0.0283333	-0.0325	-0.0455	-0.0301667	0.0628333			0.61		0.1605	0.0156	0.0793333	-0.0295	-0.0473333	-0.0533333	0.0305												0.61		0.109833	0.0448333	0.362	0.124	0.02	0.0536667	0.0734783				0.61		0.0826667	0.0175	0.01025	-0.0143333	0.089
0.62		0.045	-0.0045	-0.005	0.00083333	-0.0455	-0.0301667	0.0961667			0.62		0.0271667	0.0556	0.046	-0.0295	-0.0473333	-0.02	0.197167												0.62		0.109833	0.0115	0.312	0.157333	-0.0133333	0.0536667	0.03				0.62		-0.0173333	0.0841667	0.01025	-0.081	0.0223333
0.63		0.0116667	0.0155	0.0283333	-0.0325	-0.0455	-0.0301667	0.1295			0.63		0.0605	0.0356	0.0793333	-0.0295	-0.0473333	-0.0533333	0.0638333												0.63		0.143167	0.0781667	0.512	0.224	-0.0133333	0.0203333	0.03				0.63		0.149333	0.0508333	-0.08975	0.0523333	-0.011
0.64		0.0116667	0.0155	-0.005	-0.0325	-0.0455	0.0365	0.0295			0.64		0.1605	0.0156	-0.0206667	0.00383333	-0.0473333	-0.0533333	0.0305												0.64		0.0431667	0.0448333	0.262	0.0906667	0.02	-0.013	-0.0134783				0.64		0.149333	-0.0158333	0.06025	-0.147667	0.0556667
0.65		0.045	-0.0045	-0.005	-0.0325	-0.0455	0.0365	0.0961667			0.65		0.0271667	0.0556	0.146	0.00383333	-0.0473333	-0.0533333	0.0305												0.65		0.143167	0.0448333	0.312	0.257333	-0.0133333	-0.013	-0.0134783				0.65		0.149333	0.0175	0.21025	-0.0143333	0.0556667
0.66		0.0116667	0.0155	0.0283333	-0.0325	-0.0455	-0.0301667	0.0628333			0.66		0.0605	0.0356	0.046	0.00383333	-0.014	-0.02	-0.00283333												0.66		-0.0235	0.0115	0.262	0.224	0.0533333	-0.013	0.0734783				0.66		-0.0173333	0.0175	-0.13975	-0.081	0.0223333
0.67		0.045	-0.0045	-0.005	-0.0325	-0.0455	-0.0301667	0.1295			0.67		0.127167	-0.0244	0.046	-0.0295	-0.0473333	0.0466667	0.0305												0.67		0.0765	0.0781667	-0.088	0.124	0.02	-0.013	0.03				0.67		0.0493333	0.0175	0.26025	-0.114333	0.0223333
0.68		0.0116667	-0.0045	-0.005	-0.0325	-0.0455	-0.0301667	0.0295			0.68		0.0605	-0.0244	0.0126667	0.103833	-0.014	-0.02	-0.00283333												0.68		0.00983333	0.0781667	0.362	0.024	0.02	-0.013	0.0734783				0.68		0.182667	0.0508333	0.01025	0.019	-0.011
0.69		-0.0216667	-0.0045	0.0283333	-0.0325	-0.0455	-0.0301667	-0.00383333			0.69		0.0271667	-0.0044	0.046	0.00383333	-0.0473333	-0.0533333	0.0971667												0.69		0.00983333	-0.0218333	0.112	0.024	-0.0133333	0.087	0.03				0.69		0.182667	0.0508333	0.01025	0.019	0.089
0.7		-0.0216667	-0.0045	-0.005	0.00083333	-0.0455	-0.0301667	-0.00383333			0.7		0.0938333	-0.0244	0.0126667	0.00383333	-0.0473333	-0.0533333	0.0305												0.7		0.109833	-0.0218333	0.062	0.0906667	-0.0133333	-0.013	0.03				0.7		0.0493333	0.0175	0.01025	-0.081	-0.011
0.71		0.0116667	-0.0045	0.0616667	-0.0325	-0.0455	-0.0301667	0.0295			0.71		-0.0395	0.0156	0.0793333	-0.0295	-0.0473333	-0.0533333	-0.00283333												0.71		0.0765	0.0448333	0.362	0.190667	0.12	0.0203333	-0.0134783				0.71		0.182667	-0.0158333	-0.03975	0.0856667	-0.011
0.72		-0.0216667	-0.0045	-0.0383333	-0.0325	-0.0455	-0.0301667	-0.00383333			0.72		0.0605	-0.0044	0.0126667	-0.0295	-0.0473333	-0.02	0.0638333												0.72		0.0765	0.0781667	0.112	0.0573333	0.02	0.0203333	0.116957				0.72		0.116	0.0175	0.16025	0.0523333	-0.011
0.73		-0.0216667	0.0155	0.0616667	-0.0325	-0.0455	-0.0301667	-0.00383333			0.73		0.1605	-0.0244	0.0793333	0.00383333	-0.0473333	-0.02	0.0971667												0.73		0.109833	0.0448333	0.162	0.0906667	0.0866667	0.0536667	0.0734783				0.73		0.149333	0.0175	-0.23975	0.0856667	0.0223333
0.74		-0.0216667	-0.0045	0.0283333	-0.0325	-0.0455	-0.0301667	-0.00383333			0.74		0.0271667	0.0556	0.0793333	-0.0295	-0.0473333	-0.0533333	-0.00283333												0.74		0.0431667	0.0448333	0.162	0.0573333	0.0533333	0.0203333	0.03				0.74		0.016	-0.0158333	0.16025	-0.081	-0.011
0.75		-0.0216667	-0.0045	-0.005	-0.0325	-0.0455	-0.0301667	-0.00383333			0.75		0.0938333	0.0356	-0.0206667	0.00383333	-0.0473333	-0.02	0.0305												0.75		0.0431667	0.0448333	0.212	0.124	0.02	0.0536667	-0.0134783				0.75		0.0826667	-0.0158333	0.01025	-0.0476667	-0.011
0.76		-0.0216667	-0.0045	-0.005	0.00083333	-0.0455	-0.0301667	0.0628333			0.76		0.0271667	0.0556	-0.0206667	0.00383333	-0.0473333	-0.0533333	-0.00283333												0.76		0.109833	0.0115	0.162	0.0906667	-0.0133333	-0.013	0.116957				0.76		0.249333	0.0175	-0.03975	0.0523333	-0.011
0.77		-0.0216667	-0.0045	-0.0383333	-0.0325	-0.0455	-0.0301667	-0.00383333			0.77		0.0605	0.0156	0.0126667	0.00383333	-0.0473333	0.0133333	0.0305												0.77		0.00983333	0.0115	0.012	0.0573333	0.0533333	-0.013	0.0734783				0.77		0.182667	0.0175	-0.03975	-0.081	0.0556667
0.78		-0.0216667	-0.0045	0.0283333	-0.0325	-0.0121667	-0.0301667	0.0628333			0.78		0.0938333	-0.0044	0.046	0.00383333	-0.0473333	-0.0533333	0.0305												0.78		0.1765	0.0115	-0.038	0.024	0.0533333	-0.013	0.03				0.78		0.116	0.0508333	0.06025	-0.0476667	-0.011
0.79		-0.0216667	-0.0045	-0.005	-0.0325	-0.0455	-0.0301667	0.0295			0.79		0.127167	-0.0044	0.0793333	0.0371667	-0.0473333	-0.0533333	0.0305												0.79		-0.0235	-0.0218333	0.162	0.124	-0.0133333	-0.013	-0.0134783				0.79		0.116	-0.0158333	0.21025	0.019	-0.011
0.8		0.0116667	-0.0045	0.0616667	-0.0325	-0.0455	-0.0301667	0.0295			0.8		0.0271667	0.0556	-0.0206667	0.0371667	-0.0473333	-0.0533333	-0.00283333												0.8		0.109833	0.0448333	0.112	0.124	0.02	-0.013	-0.0134783				0.8		0.0493333	-0.0158333	0.11025	-0.0476667	0.0223333
0.81		-0.0216667	-0.0045	0.0283333	-0.0325	-0.0455	-0.0301667	0.0295			0.81		0.0271667	0.0156	0.046	-0.0295	-0.0473333	-0.02	-0.00283333												0.81		0.00983333	-0.0218333	-0.088	0.124	0.0533333	0.0203333	0.116957				0.81		0.149333	-0.0158333	-0.23975	0.019	-0.011
0.82		0.0116667	0.0155	0.0616667	-0.0325	-0.0121667	-0.0301667	0.0628333			0.82		0.127167	0.0156	-0.0206667	-0.0295	-0.0473333	-0.02	0.0305												0.82		0.109833	0.144833	0.162	0.0573333	-0.0133333	0.0203333	-0.0134783				0.82		0.0493333	-0.0158333	0.01025	0.0523333	-0.011
0.83		0.0116667	-0.0045	0.0616667	0.00083333	-0.0455	-0.0301667	0.0295			0.83		-0.0395	0.0156	0.0126667	-0.0295	-0.0473333	-0.0533333	0.0305												0.83		0.143167	0.0781667	0.062	0.0906667	-0.0133333	-0.013	0.03				0.83		0.182667	0.0175	0.11025	-0.081	-0.011
0.84		-0.0216667	-0.0045	-0.0383333	-0.0325	-0.0455	-0.0301667	-0.00383333			0.84		0.0271667	-0.0044	0.0126667	-0.0295	-0.0473333	-0.02	-0.00283333												0.84		0.109833	0.0448333	-0.038	0.024	-0.0133333	-0.013	-0.0134783				0.84		0.0493333	0.0175	-0.08975	-0.081	-0.011
0.85		-0.0216667	-0.0045	0.0283333	-0.0325	-0.0455	-0.0301667	-0.00383333			0.85		0.0605	0.0156	0.046	-0.0295	-0.0473333	-0.0533333	-0.00283333												0.85		0.1765	-0.0218333	0.162	0.157333	0.0866667	-0.013	-0.0134783				0.85		0.249333	0.0175	-0.03975	-0.081	-0.011
0.86		-0.0216667	-0.0045	-0.005	-0.0325	-0.0455	-0.0301667	-0.00383333			0.86		0.0271667	-0.0044	-0.0206667	-0.0295	-0.0473333	-0.02	0.0638333												0.86		0.143167	0.0781667	-0.038	0.0906667	0.02	-0.013	0.0734783				0.86		0.0493333	-0.0158333	0.06025	-0.114333	0.0556667
0.87		-0.0216667	0.0155	0.0616667	-0.0325	-0.0455	-0.0301667	0.0628333			0.87		0.0605	0.0156	0.0793333	-0.0295	-0.0473333	-0.0533333	-0.00283333												0.87		0.1765	0.0448333	0.162	0.024	-0.0133333	-0.013	-0.0134783				0.87		0.116	-0.0158333	0.11025	-0.0476667	0.0556667
0.88		0.0116667	-0.0045	0.0616667	-0.0325	-0.0121667	-0.0301667	-0.00383333			0.88		-0.0395	-0.0244	-0.0206667	0.00383333	-0.0473333	-0.0533333	0.1305												0.88		0.109833	0.0115	0.062	0.224	-0.0133333	0.0536667	-0.0134783				0.88		0.0826667	-0.0158333	-0.18975	-0.081	0.0556667
0.89		0.0116667	-0.0045	0.0283333	-0.0325	-0.0455	-0.0301667	-0.00383333			0.89		0.0271667	-0.0244	-0.0206667	-0.0295	-0.0473333	-0.0533333	0.0305												0.89		0.0765	-0.0218333	0.112	0.024	0.02	-0.013	0.03				0.89		0.0493333	0.0175	0.26025	-0.0143333	0.089
0.9		-0.0216667	-0.0045	-0.005	-0.0325	-0.0455	-0.0301667	-0.00383333			0.9		-0.00616667	-0.0044	0.046	-0.0295	-0.014	-0.0533333	-0.00283333												0.9		0.109833	-0.0218333	0.162	0.0573333	0.02	-0.013	0.03				0.9		0.0493333	-0.0158333	0.11025	-0.147667	-0.011
0.91		0.0783333	-0.0045	0.0283333	-0.0325	-0.0121667	0.00316667	0.0295			0.91		-0.00616667	-0.0244	0.0126667	0.00383333	-0.0473333	-0.02	0.0638333												0.91		0.209833	-0.0218333	-0.038	0.257333	-0.0133333	0.0203333	0.03				0.91		0.116	0.0175	-0.08975	-0.081	0.0223333
0.92		-0.0216667	-0.0045	-0.005	-0.0325	-0.0455	0.00316667	0.0295			0.92		0.0271667	-0.0044	0.0126667	-0.0295	-0.0473333	-0.0533333	0.0305												0.92		0.143167	0.0115	0.162	0.024	0.02	-0.013	0.116957				0.92		0.0493333	0.0508333	0.06025	0.152333	-0.011
0.93		-0.0216667	-0.0045	-0.005	-0.0325	-0.0455	-0.0301667	-0.00383333			0.93		-0.00616667	-0.0244	0.046	-0.0295	-0.0473333	-0.0533333	0.0305												0.93		0.0765	0.0448333	0.012	0.290667	-0.0133333	-0.013	0.03				0.93		0.0826667	0.0175	0.11025	-0.081	-0.011
0.94		-0.0216667	-0.0045	-0.0383333	-0.0325	-0.0455	-0.0301667	0.0628333			0.94		0.0605	0.0356	0.0126667	0.00383333	-0.0473333	-0.0533333	-0.00283333												0.94		0.209833	-0.0218333	0.262	-0.0426667	-0.0133333	0.0203333	0.0734783				0.94		0.016	-0.0158333	-0.03975	-0.0476667	0.0223333
0.95		-0.0216667	-0.0045	-0.005	-0.0325	-0.0455	-0.0301667	0.0295			0.95		0.0605	-0.0244	0.046	-0.0295	-0.0473333	-0.0533333	-0.00283333												0.95		0.109833	-0.0218333	-0.038	0.0906667	0.02	-0.013	-0.0134783				0.95		0.016	0.0508333	0.11025	-0.0476667	-0.011
0.96		-0.0216667	-0.0045	-0.005	0.0341667	-0.0455	-0.0301667	0.0295			0.96		0.0271667	0.0356	0.0126667	-0.0295	-0.0473333	-0.0533333	-0.00283333												0.96		0.0765	0.0115	0.012	0.157333	-0.0133333	-0.013	0.03				0.96		0.016	0.0175	0.21025	-0.081	0.0556667
0.97		0.0116667	-0.0045	-0.0383333	-0.0325	-0.0455	-0.0301667	-0.00383333			0.97		-0.00616667	0.0356	0.046	-0.0295	-0.0473333	-0.02	-0.00283333												0.97		0.143167	0.0115	0.112	-0.0426667	-0.0133333	0.0536667	0.03				0.97		0.116	0.0508333	-0.13975	-0.081	-0.011
0.98		-0.0216667	-0.0045	0.0283333	-0.0325	-0.0455	-0.0301667	-0.00383333			0.98		0.0271667	-0.0044	0.0126667	-0.0295	-0.0473333	-0.02	-0.00283333												0.98		0.0431667	0.0115	0.012	0.024	0.0533333	-0.013	-0.0134783				0.98		0.016	-0.0158333	0.21025	0.019	-0.011
0.99		-0.0216667	-0.0045	-0.005	-0.0325	-0.0455	-0.0301667	-0.00383333			0.99		-0.0395	-0.0044	0.046	-0.0295	-0.0473333	-0.0533333	-0.00283333												0.99		0.0431667	0.0115	0.062	0.0573333	0.02	0.0203333	-0.0134783				0.99		0.116	0.0841667	0.01025	-0.114333	0.0556667
1		-0.0216667	-0.0045	-0.005	-0.0325	-0.0121667	-0.0301667	-0.00383333			1		-0.00616667	0.0156	0.046	-0.0295	-0.0473333	-0.02	0.0305												1		0.1765	-0.0218333	0.162	-0.00933333	0.0533333	-0.013	0.0734783				1		-0.0506667	0.0175	0.06025	0.019	-0.011
1.01		-0.0216667	-0.0045	-0.0383333	-0.0325	-0.0455	-0.0301667	-0.00383333			1.01		0.0271667	-0.0044	0.046	0.00383333	-0.0473333	-0.0533333	0.0305												1.01		0.143167	-0.0218333	-0.088	0.0573333	0.02	-0.013	-0.0134783				1.01		0.0826667	-0.0158333	0.11025	-0.0143333	-0.011
1.02		0.045	0.0155	0.0616667	-0.0325	-0.0455	-0.0301667	-0.00383333			1.02		-0.0395	0.0156	-0.0206667	-0.0295	-0.0473333	-0.0533333	-0.00283333												1.02		0.1765	0.0115	0.212	-0.0426667	-0.0133333	-0.013	-0.0134783				1.02		-0.0506667	-0.0158333	-0.03975	-0.0476667	0.0223333
1.03		-0.0216667	-0.0045	-0.005	-0.0325	-0.0455	-0.0301667	0.0295			1.03		0.0271667	-0.0244	0.0126667	-0.0295	-0.0473333	-0.0533333	0.0305												1.03		0.00983333	-0.0218333	0.012	0.157333	-0.0133333	-0.013	0.03				1.03		0.0493333	0.0175	0.06025	-0.081	-0.011
1.04		-0.0216667	-0.0045	0.0283333	-0.0325	-0.0455	-0.0301667	-0.00383333			1.04		0.0271667	0.0356	-0.0206667	0.00383333	-0.0473333	-0.0533333	-0.00283333												1.04		0.0765	-0.0218333	-0.188	-0.00933333	0.02	-0.013	-0.0134783				1.04		-0.0173333	-0.0158333	-0.08975	-0.081	0.0223333
1.05		-0.0216667	-0.0045	-0.005	-0.0325	-0.0455	-0.0301667	-0.00383333			1.05		-0.00616667	0.0556	0.0793333	-0.0295	-0.0473333	-0.0533333	0.0638333												1.05		0.109833	0.0448333	0.262	0.0906667	-0.0133333	-0.013	0.03				1.05		-0.0506667	-0.0158333	0.11025	0.0856667	-0.011
1.06		0.0116667	-0.0045	0.0283333	-0.0325	-0.0455	-0.0301667	0.0295			1.06		0.0271667	-0.0244	0.0126667	0.00383333	-0.0473333	-0.0533333	0.0638333												1.06		0.109833	-0.0218333	-0.188	-0.00933333	-0.0133333	0.0203333	-0.0134783				1.06		-0.0173333	-0.0158333	-0.08975	0.0523333	-0.011
1.07		-0.0216667	-0.0045	-0.005	-0.0325	-0.0455	-0.0301667	0.0628333			1.07		-0.00616667	-0.0244	0.0126667	-0.0295	-0.0473333	-0.0533333	-0.00283333												1.07		0.0765	0.0448333	0.062	0.024	-0.0133333	0.0536667	-0.0134783				1.07		0.0493333	0.0175	-0.08975	-0.081	-0.011
1.08		-0.0216667	0.0155	0.0283333	-0.0325	-0.0121667	-0.0301667	0.0295			1.08		-0.0395	-0.0244	-0.0206667	-0.0295	-0.0473333	-0.0533333	-0.00283333												1.08		0.0765	0.0115	-0.138	-0.00933333	-0.0133333	-0.013	0.116957				1.08		0.0493333	0.0508333	0.21025	-0.0143333	0.0556667
1.09		0.0116667	0.0155	-0.005	-0.0325	-0.0455	-0.0301667	-0.00383333			1.09		0.0605	0.0556	0.0126667	0.00383333	-0.0473333	-0.0533333	-0.00283333												1.09		0.0765	-0.0218333	0.062	0.0573333	0.02	-0.013	0.03				1.09		-0.0173333	-0.0158333	-0.03975	-0.081	-0.011
1.1		0.0116667	-0.0045	-0.005	-0.0325	-0.0455	-0.0301667	0.0295			1.1		0.0938333	0.0356	0.0793333	-0.0295	-0.0473333	-0.0533333	0.0638333												1.1		0.109833	0.0448333	0.012	-0.0426667	0.02	0.0203333	0.03				1.1		0.0493333	-0.0158333	0.06025	-0.0143333	-0.011
1.11		0.0116667	-0.0045	-0.005	-0.0325	-0.0455	-0.0301667	-0.00383333			1.11		-0.0395	-0.0044	0.046	-0.0295	-0.0473333	-0.0533333	0.0305												1.11		0.00983333	0.0448333	-0.038	0.024	-0.0133333	-0.013	-0.0134783				1.11		0.016	0.0508333	0.06025	-0.0476667	-0.011
1.12		0.0116667	0.0155	-0.0383333	-0.0325	-0.0455	-0.0301667	-0.00383333			1.12		-0.0395	0.0156	0.0126667	-0.0295	-0.0473333	-0.02	-0.00283333												1.12		0.0431667	-0.0218333	0.162	0.190667	-0.0133333	-0.013	0.03				1.12		0.0493333	-0.0158333	-0.08975	-0.181	-0.011
1.13		0.045	-0.0045	0.0616667	-0.0325	-0.0455	-0.0301667	-0.00383333			1.13		0.0605	-0.0244	0.046	-0.0295	-0.0473333	-0.0533333	-0.00283333												1.13		0.00983333	0.0448333	0.062	-0.00933333	-0.0133333	-0.013	0.03				1.13		-0.0506667	-0.0158333	-0.03975	-0.0476667	0.0223333
1.14		0.0116667	0.0155	0.0283333	-0.0325	-0.0455	-0.0301667	-0.00383333			1.14		-0.0395	0.0156	0.0126667	-0.0295	-0.0473333	-0.0533333	-0.00283333												1.14		0.0431667	0.0115	-0.038	0.0906667	-0.0133333	0.0203333	0.03				1.14		0.016	-0.0158333	-0.03975	-0.0143333	0.0223333
1.15		-0.0216667	-0.0045	-0.0383333	-0.0325	-0.0455	0.00316667	0.0295			1.15		0.0271667	0.0156	-0.0206667	0.00383333	-0.0473333	-0.0533333	-0.00283333												1.15		0.00983333	-0.0218333	0.012	0.0573333	-0.0133333	-0.013	0.03				1.15		0.0826667	0.0508333	0.01025	-0.0143333	0.0223333
1.16		-0.0216667	-0.0045	-0.005	-0.0325	-0.0455	0.0365	-0.00383333			1.16		-0.00616667	-0.0044	-0.0206667	0.0371667	-0.0473333	-0.0533333	-0.00283333												1.16		0.109833	0.0781667	-0.088	0.0573333	-0.0133333	-0.013	0.03				1.16		-0.0506667	-0.0158333	0.06025	0.019	0.0223333
1.17		-0.0216667	-0.0045	-0.005	-0.0325	-0.0455	-0.0301667	-0.00383333			1.17		0.0271667	-0.0244	0.0126667	-0.0295	-0.0473333	-0.0533333	0.0305												1.17		-0.0235	0.0115	-0.038	0.0573333	0.0533333	0.0536667	-0.0134783				1.17		-0.0173333	-0.0158333	0.06025	-0.081	0.0223333
1.18		0.0116667	-0.0045	0.0283333	-0.0325	-0.0121667	-0.0301667	-0.00383333			1.18		0.0605	0.0356	0.0126667	0.00383333	-0.0473333	-0.0533333	-0.00283333												1.18		0.0765	-0.0218333	0.012	0.124	-0.0133333	-0.013	-0.0134783				1.18		0.0826667	-0.0158333	-0.08975	-0.0143333	-0.011
1.19		0.0116667	-0.0045	0.0283333	-0.0325	-0.0455	-0.0301667	-0.00383333			1.19		0.0271667	0.0156	-0.0206667	-0.0295	-0.0473333	-0.0533333	-0.00283333												1.19		0.0431667	0.0115	-0.088	0.224	0.02	-0.013	0.03				1.19		0.0826667	0.0508333	-0.03975	-0.0143333	0.0556667
1.2		0.0116667	-0.0045	-0.005	-0.0325	-0.0455	-0.0301667	0.0295			1.2		0.0271667	0.0156	-0.0206667	-0.0295	-0.0473333	-0.0533333	-0.00283333												1.2		0.00983333	-0.0218333	-0.088	-0.00933333	-0.0133333	-0.013	0.116957				1.2		0.0493333	-0.0158333	0.16025	-0.0476667	0.0223333
1.21		-0.0216667	-0.0045	-0.005	-0.0325	-0.0455	-0.0301667	-0.00383333			1.21		-0.0395	-0.0244	-0.0206667	-0.0295	-0.0473333	-0.02	-0.00283333												1.21		0.109833	0.0115	0.062	-0.0426667	-0.0133333	0.153667	0.03				1.21		0.0493333	-0.0158333	-0.18975	0.0523333	0.0223333
1.22		0.0116667	-0.0045	-0.005	-0.0325	-0.0455	-0.0301667	0.0295			1.22		-0.0395	-0.0244	0.0126667	-0.0295	-0.0473333	0.0133333	-0.00283333												1.22		0.0431667	-0.0218333	0.062	-0.0426667	-0.0133333	-0.013	-0.0134783				1.22		0.0826667	0.0175	0.06025	-0.0143333	0.0223333
1.23		0.0116667	-0.0045	0.0283333	-0.0325	-0.0455	-0.0301667	0.0295			1.23		0.0271667	0.0356	0.0126667	-0.0295	-0.0473333	-0.02	-0.00283333												1.23		0.0431667	-0.0218333	-0.088	-0.00933333	-0.0133333	-0.013	0.03				1.23		0.149333	-0.0158333	0.01025	-0.0476667	-0.011
1.24		-0.0216667	0.0155	-0.005	-0.0325	-0.0121667	-0.0301667	-0.00383333			1.24		-0.0395	-0.0044	0.0126667	-0.0295	-0.0473333	-0.02	-0.00283333												1.24		0.0765	0.0115	-0.038	0.0573333	-0.0133333	-0.013	0.03				1.24		0.116	-0.0158333	-0.08975	-0.114333	0.0223333
1.25		0.0116667	-0.0045	0.0283333	-0.0325	-0.0455	-0.0301667	-0.00383333			1.25		0.0271667	0.0356	-0.0206667	-0.0295	-0.0473333	-0.0533333	-0.00283333												1.25		0.109833	0.0115	-0.088	0.024	-0.0133333	-0.013	-0.0134783				1.25		0.116	0.0508333	-0.08975	0.019	-0.011
1.26		0.0116667	-0.0045	0.0616667	-0.0325	-0.0455	-0.0301667	0.0295			1.26		-0.00616667	0.0156	0.0126667	-0.0295	-0.0473333	-0.0533333	0.0971667												1.26		0.0765	0.0781667	0.012	-0.00933333	0.02	-0.013	-0.0134783				1.26		0.0493333	-0.0158333	0.31025	0.0856667	0.0556667
1.27		0.0116667	-0.0045	0.095	-0.0325	-0.0121667	-0.0301667	0.0295			1.27		-0.00616667	-0.0244	-0.0206667	-0.0295	-0.0473333	-0.0533333	-0.00283333												1.27		0.143167	0.0115	0.012	0.0573333	0.0533333	-0.013	0.0734783				1.27		0.016	-0.0158333	-0.18975	-0.147667	-0.011
1.28		0.045	-0.0045	-0.005	-0.0325	-0.0455	-0.0301667	-0.00383333			1.28		-0.0395	-0.0044	-0.0206667	-0.0295	-0.0473333	-0.0533333	-0.00283333												1.28		0.0765	-0.0218333	0.012	0.024	-0.0133333	-0.013	-0.0134783				1.28		0.0493333	-0.0158333	0.16025	-0.114333	0.0223333
1.29		-0.0216667	0.0155	-0.005	-0.0325	-0.0455	-0.0301667	0.0295			1.29		0.0271667	0.0156	0.0126667	-0.0295	-0.0473333	-0.0533333	0.0638333												1.29		-0.0235	-0.0218333	0.112	-0.0426667	-0.0133333	-0.013	0.0734783				1.29		0.0493333	-0.0158333	0.21025	-0.081	-0.011
1.3		0.045	-0.0045	-0.005	-0.0325	-0.0455	-0.0301667	-0.00383333			1.3		-0.0395	-0.0244	0.046	-0.0295	-0.0473333	-0.0533333	-0.00283333												1.3		0.0765	-0.0218333	0.112	0.224	0.02	-0.013	0.03				1.3		0.0493333	0.0175	0.01025	0.019	-0.011
1.31		0.045	-0.0045	0.0283333	-0.0325	-0.0121667	-0.0301667	0.0295			1.31		0.0605	-0.0244	-0.0206667	-0.0295	-0.0473333	-0.0533333	-0.00283333												1.31		0.143167	-0.0218333	0.012	-0.00933333	-0.0133333	-0.013	-0.0134783				1.31		-0.0506667	-0.0158333	0.16025	0.019	-0.011
1.32		0.0783333	-0.0045	-0.005	-0.0325	-0.0455	-0.0301667	-0.00383333			1.32		0.0271667	0.0156	-0.0206667	-0.0295	-0.0473333	-0.0533333	-0.00283333												1.32		0.0431667	0.144833	0.162	0.024	-0.0133333	0.0203333	-0.0134783				1.32		0.0493333	0.0175	-0.03975	-0.0143333	-0.011
1.33		0.0116667	0.0155	-0.0383333	-0.0325	-0.0455	-0.0301667	-0.00383333			1.33		-0.00616667	-0.0044	-0.0206667	0.00383333	-0.0473333	-0.0533333	-0.00283333												1.33		0.0765	-0.0218333	0.062	0.0573333	0.02	-0.013	0.03				1.33		0.0493333	0.0175	-0.13975	0.019	0.0223333
1.34		-0.0216667	-0.0045	-0.005	-0.0325	-0.0455	-0.0301667	-0.00383333			1.34		0.0605	0.0156	0.046	0.00383333	-0.0473333	-0.02	0.0305												1.34		-0.0235	-0.0218333	-0.338	-0.0426667	-0.0133333	-0.013	-0.0134783				1.34		0.116	-0.0158333	0.01025	-0.0143333	-0.011
1.35		-0.0216667	-0.0045	-0.005	-0.0325	-0.0455	-0.0301667	0.0295			1.35		0.0271667	0.0156	0.046	-0.0295	-0.0473333	-0.0533333	-0.00283333												1.35		0.00983333	0.0448333	0.062	-0.00933333	-0.0133333	-0.013	0.0734783				1.35		0.0826667	-0.0158333	0.11025	0.0523333	-0.011
1.36		-0.0216667	0.0155	-0.005	-0.0325	-0.0455	0.00316667	0.0295			1.36		-0.00616667	0.0156	0.0126667	-0.0295	-0.0473333	-0.0533333	0.0305												1.36		0.0765	0.0115	-0.138	0.157333	0.02	0.0536667	-0.0134783				1.36		-0.0173333	-0.0158333	0.01025	-0.0476667	-0.011
1.37		-0.0216667	-0.0045	0.0616667	-0.0325	-0.0455	-0.0301667	-0.00383333			1.37		-0.00616667	-0.0244	0.0126667	-0.0295	-0.0473333	-0.0533333	0.0305												1.37		0.00983333	-0.0218333	0.062	0.0906667	-0.0133333	0.087	-0.0134783				1.37		0.0493333	-0.0158333	0.16025	0.0523333	-0.011
1.38		-0.0216667	-0.0045	0.0616667	-0.0325	-0.0455	-0.0301667	-0.00383333			1.38		0.0271667	-0.0244	-0.0206667	-0.0295	-0.0473333	-0.0533333	-0.00283333												1.38		0.0431667	-0.0218333	-0.138	-0.00933333	-0.0133333	0.0536667	0.03				1.38		0.116	0.0175	-0.13975	-0.114333	-0.011
1.39		-0.0216667	-0.0045	-0.005	-0.0325	-0.0455	0.0365	-0.00383333			1.39		-0.00616667	-0.0044	0.0126667	0.00383333	-0.0473333	0.0466667	-0.00283333												1.39		0.00983333	-0.0218333	0.062	0.024	0.0533333	-0.013	0.03				1.39		0.0493333	0.0175	-0.03975	0.0856667	0.0556667
1.4		-0.0216667	0.0155	0.0283333	-0.0325	-0.0455	0.0365	-0.00383333			1.4		-0.0395	-0.0044	-0.0206667	-0.0295	-0.0473333	-0.0533333	0.0305												1.4		-0.0235	0.0448333	-0.138	0.0573333	-0.0133333	-0.013	0.03				1.4		0.0493333	-0.0158333	0.26025	-0.0143333	0.0223333
1.41		0.0116667	-0.0045	-0.0383333	-0.0325	-0.0455	0.0365	-0.00383333			1.41		-0.00616667	0.0556	0.0126667	-0.0295	-0.0473333	-0.0533333	0.0305												1.41		0.109833	-0.0218333	0.012	-0.00933333	0.02	0.0203333	-0.0134783				1.41		-0.0506667	0.0175	-0.03975	-0.081	0.0223333
1.42		0.045	-0.0045	0.0283333	-0.0325	-0.0455	-0.0301667	-0.00383333			1.42		-0.00616667	0.0556	0.0126667	-0.0295	-0.0473333	-0.0533333	-0.00283333												1.42		0.00983333	0.1115	0.062	0.024	-0.0133333	-0.013	-0.0134783				1.42		-0.0173333	-0.0158333	0.06025	-0.0476667	0.0223333
1.43		-0.0216667	-0.0045	-0.005	-0.0325	-0.0455	-0.0301667	0.0295			1.43		0.0271667	-0.0244	0.0126667	-0.0295	-0.0473333	-0.0533333	-0.00283333												1.43		-0.0235	-0.0218333	-0.088	-0.0426667	-0.0133333	-0.013	-0.0134783				1.43		-0.0173333	-0.0158333	-0.23975	0.019	0.0223333
1.44		0.0116667	0.0155	-0.0383333	-0.0325	-0.0455	-0.0301667	-0.00383333			1.44		0.0271667	0.0156	0.046	-0.0295	-0.0473333	-0.02	-0.00283333												1.44		0.0431667	0.0115	-0.038	-0.076	0.0533333	0.0536667	0.03				1.44		0.0493333	-0.0158333	0.11025	0.019	-0.011
1.45		-0.0216667	-0.0045	-0.005	-0.0325	-0.0121667	-0.0301667	0.0295			1.45		-0.00616667	-0.0044	-0.0206667	0.00383333	-0.0473333	0.0466667	-0.00283333												1.45		0.0431667	0.0115	-0.138	0.0906667	0.0533333	-0.013	-0.0134783				1.45		-0.0506667	-0.0158333	0.01025	-0.0476667	0.0556667
1.46		-0.0216667	-0.0045	-0.005	-0.0325	-0.0455	-0.0301667	-0.00383333			1.46		-0.00616667	0.0156	0.046	-0.0295	-0.0473333	-0.02	0.0305												1.46		0.00983333	-0.0218333	0.112	-0.076	-0.0133333	-0.013	0.03				1.46		0.0826667	0.0175	0.06025	0.019	-0.011
1.47		0.0116667	-0.0045	-0.005	-0.0325	-0.0455	-0.0301667	-0.00383333			1.47		-0.00616667	-0.0244	-0.0206667	-0.0295	-0.0473333	0.0133333	-0.00283333												1.47		0.00983333	0.0781667	0.012	0.024	0.02	-0.013	-0.0134783				1.47		0.0493333	-0.0158333	-0.03975	0.0523333	0.0223333
1.48		0.0116667	0.0155	0.0616667	-0.0325	-0.0455	-0.0301667	-0.00383333			1.48		0.0938333	-0.0044	0.046	-0.0295	-0.0473333	-0.02	0.0305												1.48		0.00983333	-0.0218333	-0.138	0.0573333	0.02	-0.013	0.03				1.48		0.016	0.0175	0.06025	0.019	-0.011
1.49		-0.0216667	-0.0045	-0.005	-0.0325	-0.0455	-0.0301667	0.0295			1.49		-0.00616667	-0.0244	-0.0206667	0.00383333	-0.0473333	-0.02	0.0305												1.49		0.00983333	0.0115	-0.038	-0.00933333	-0.0133333	-0.013	0.03				1.49		0.0493333	0.0175	0.06025	-0.0476667	-0.011
1.5		0.0116667	-0.0045	-0.0383333	0.00083333	-0.0455	-0.0301667	-0.00383333			1.5		-0.00616667	0.0156	-0.0206667	-0.0295	-0.0473333	0.0133333	0.0305												1.5		0.143167	0.0115	0.012	0.0573333	-0.0133333	-0.013	0.03				1.5		0.016	-0.0158333	-0.18975	0.0856667	-0.011
1.51		0.045	-0.0045	0.0616667	0.0341667	-0.0455	-0.0301667	-0.00383333			1.51		-0.00616667	0.0556	0.0126667	0.00383333	-0.0473333	-0.0533333	-0.00283333												1.51		0.00983333	-0.0218333	-0.188	-0.00933333	-0.0133333	-0.013	0.03				1.51		0.149333	-0.0158333	0.01025	-0.0476667	-0.011
1.52		-0.0216667	-0.0045	-0.0383333	-0.0325	0.0545	-0.0301667	-0.00383333			1.52		0.0271667	-0.0244	0.0126667	-0.0295	-0.0473333	-0.02	0.0305												1.52		0.00983333	-0.0218333	0.012	0.024	-0.0133333	0.0203333	-0.0134783				1.52		-0.0506667	0.0175	-0.23975	-0.0476667	0.0223333
1.53		-0.0216667	-0.0045	-0.005	-0.0325	-0.0455	-0.0301667	-0.00383333			1.53		-0.0395	0.0156	0.0126667	-0.0295	-0.0473333	-0.02	-0.00283333												1.53		0.0431667	-0.0218333	0.062	0.0906667	-0.0133333	0.0203333	-0.0134783				1.53		0.016	0.0841667	0.16025	-0.114333	-0.011
1.54		0.0116667	0.0155	-0.005	-0.0325	-0.0455	-0.0301667	0.0295			1.54		-0.00616667	-0.0044	0.0126667	-0.0295	-0.0473333	-0.0533333	-0.00283333												1.54		0.00983333	-0.0218333	-0.038	-0.109333	-0.0133333	-0.013	-0.0134783				1.54		0.116	-0.0158333	0.06025	-0.0143333	0.0223333
1.55		0.0116667	0.0155	-0.0383333	-0.0325	-0.0455	-0.0301667	0.0295			1.55		0.0271667	0.0356	0.0126667	-0.0295	0.0193333	-0.02	-0.00283333												1.55		-0.0235	-0.0218333	-0.088	-0.00933333	-0.0133333	-0.013	0.03				1.55		0.016	-0.0158333	0.06025	0.0856667	-0.011
1.56		0.0116667	-0.0045	-0.005	-0.0325	-0.0121667	-0.0301667	0.0295			1.56		-0.00616667	-0.0244	0.0126667	-0.0295	-0.014	-0.0533333	-0.00283333												1.56		0.0765	0.0115	-0.038	0.0573333	-0.0133333	0.0203333	-0.0134783				1.56		-0.0173333	0.0175	0.06025	-0.0143333	-0.011
1.57		-0.0216667	-0.0045	0.0283333	-0.0325	-0.0455	-0.0301667	-0.00383333			1.57		0.0605	-0.0244	-0.0206667	-0.0295	-0.0473333	-0.02	-0.00283333												1.57		0.00983333	0.0115	-0.088	-0.00933333	-0.0133333	-0.013	0.03				1.57		0.0493333	0.0175	0.16025	0.0856667	-0.011
1.58		-0.0216667	-0.0045	0.0283333	-0.0325	0.0211667	-0.0301667	-0.00383333			1.58		-0.00616667	-0.0244	0.046	-0.0295	-0.0473333	-0.0533333	-0.00283333												1.58		0.0431667	0.0448333	-0.038	0.0906667	-0.0133333	-0.013	0.0734783				1.58		0.016	-0.0158333	-0.08975	-0.0143333	-0.011
1.59		-0.0216667	-0.0045	0.0283333	-0.0325	-0.0121667	-0.0301667	0.0295			1.59		-0.0395	0.0156	0.046	-0.0295	-0.0473333	-0.0533333	-0.00283333												1.59		0.0765	-0.0218333	0.212	-0.00933333	-0.0133333	-0.013	-0.0134783				1.59		0.0826667	-0.0158333	-0.08975	-0.0143333	-0.011
1.6		-0.0216667	-0.0045	0.0283333	-0.0325	0.0211667	-0.0301667	-0.00383333			1.6		0.0271667	-0.0044	0.0126667	-0.0295	0.0193333	-0.02	-0.00283333												1.6		0.0431667	0.0115	0.012	0.024	0.02	-0.013	0.116957				1.6		0.016	-0.0158333	-0.03975	0.0523333	-0.011
1.61		-0.0216667	-0.0045	0.0283333	0.00083333	0.0211667	-0.0301667	-0.00383333			1.61		-0.00616667	0.0156	0.112667	-0.0295	-0.014	0.0133333	0.0638333												1.61		0.0431667	-0.0218333	0.162	-0.00933333	-0.0133333	0.0203333	-0.0134783				1.61		-0.0173333	0.0508333	0.06025	-0.0143333	-0.011
1.62		0.045	-0.0045	-0.0383333	0.00083333	-0.0455	-0.0301667	-0.00383333			1.62		0.0605	-0.0044	-0.0206667	-0.0295	-0.0473333	0.0133333	-0.00283333												1.62		0.0765	0.0115	-0.188	0.024	0.02	-0.013	0.0734783				1.62		0.149333	0.0175	-0.03975	0.019	-0.011
1.63		-0.0216667	0.0155	-0.005	-0.0325	-0.0455	-0.0301667	-0.00383333			1.63		-0.0395	-0.0044	-0.0206667	-0.0295	-0.0473333	0.0133333	-0.00283333												1.63		0.0765	0.0448333	-0.038	0.024	-0.0133333	-0.013	-0.0134783				1.63		0.0826667	0.0175	-0.18975	-0.0476667	0.0223333
1.64		0.0116667	-0.0045	-0.005	-0.0325	-0.0455	0.00316667	-0.00383333			1.64		-0.0395	-0.0244	-0.0206667	-0.0295	-0.0473333	-0.0533333	-0.00283333												1.64		0.0431667	0.0115	-0.138	-0.142667	-0.0133333	-0.013	-0.0134783				1.64		-0.0506667	-0.0158333	0.01025	0.0856667	0.0556667
1.65		-0.0216667	0.0155	-0.0383333	-0.0325	-0.0455	-0.0301667	-0.00383333			1.65		-0.00616667	-0.0044	0.0126667	-0.0295	-0.0473333	-0.0533333	0.0305												1.65		0.0431667	-0.0218333	0.012	-0.00933333	-0.0133333	0.0536667	-0.0134783				1.65		0.016	-0.0158333	-0.13975	0.0856667	-0.011
1.66		0.0116667	-0.0045	-0.0383333	-0.0325	-0.0455	-0.0301667	-0.00383333			1.66		-0.0395	0.0156	0.0126667	0.00383333	-0.0473333	-0.02	-0.00283333												1.66		0.0765	0.0781667	-0.138	0.0906667	-0.0133333	-0.013	-0.0134783				1.66		0.0826667	-0.0158333	-0.13975	-0.081	0.0556667
1.67		0.0116667	-0.0045	-0.005	-0.0325	0.0211667	0.0365	-0.00383333			1.67		0.0271667	-0.0244	-0.0206667	-0.0295	-0.0473333	0.0133333	-0.00283333												1.67		0.0431667	-0.0218333	-0.138	-0.076	-0.0133333	-0.013	-0.0134783				1.67		-0.0173333	0.0175	0.21025	-0.0476667	-0.011
1.68		0.0116667	0.0155	0.0616667	-0.0325	-0.0121667	0.0365	0.0295			1.68		-0.00616667	-0.0244	0.046	-0.0295	-0.0473333	0.0466667	-0.00283333												1.68		0.109833	0.0115	0.112	0.0906667	0.02	-0.013	-0.0134783				1.68		-0.0173333	-0.0158333	0.01025	-0.0143333	0.0223333
1.69		0.0116667	-0.0045	-0.005	-0.0325	-0.0455	-0.0301667	-0.00383333			1.69		-0.0395	-0.0044	0.0126667	-0.0295	0.0193333	-0.02	0.0305												1.69		0.109833	-0.0218333	-0.038	-0.00933333	0.02	-0.013	0.03				1.69		-0.0173333	-0.0158333	-0.08975	0.0856667	0.0223333
1.7		-0.0216667	-0.0045	-0.0383333	-0.0325	-0.0455	-0.0301667	-0.00383333			1.7		0.0271667	-0.0044	-0.0206667	-0.0295	-0.014	0.0133333	-0.00283333												1.7		0.0431667	0.0115	0.012	0.0573333	-0.0133333	-0.013	-0.0134783				1.7		-0.0506667	-0.0158333	0.01025	-0.081	-0.011
1.71		0.0116667	-0.0045	-0.005	-0.0325	-0.0455	-0.0301667	-0.00383333			1.71		-0.00616667	-0.0244	-0.0206667	-0.0295	-0.0473333	-0.0533333	-0.00283333												1.71		0.109833	-0.0218333	0.012	-0.00933333	0.02	-0.013	0.03				1.71		0.116	0.0175	-0.13975	0.119	-0.011
1.72		0.0116667	-0.0045	0.0283333	-0.0325	0.0211667	-0.0301667	-0.00383333			1.72		0.0605	0.0556	0.046	-0.0295	-0.0473333	0.0133333	0.0305												1.72		0.00983333	-0.0218333	-0.138	-0.076	0.0533333	-0.013	-0.0134783				1.72		-0.0506667	-0.0158333	0.01025	-0.0476667	-0.011
1.73		-0.0216667	-0.0045	-0.005	-0.0325	-0.0121667	-0.0301667	-0.00383333			1.73		0.0605	-0.0244	0.0126667	-0.0295	-0.014	-0.02	0.0305												1.73		-0.0235	0.0448333	0.062	-0.0426667	-0.0133333	-0.013	0.03				1.73		0.0493333	0.0175	-0.13975	-0.114333	-0.011
1.74		-0.0216667	-0.0045	-0.005	0.0341667	-0.0455	-0.0301667	-0.00383333			1.74		0.0605	-0.0044	-0.0206667	-0.0295	0.0526667	0.0133333	-0.00283333												1.74		0.00983333	-0.0218333	-0.188	-0.109333	-0.0133333	0.087	0.03				1.74		-0.0173333	-0.0158333	0.31025	-0.0476667	0.0556667
1.75		0.0116667	-0.0045	0.0283333	0.0675	-0.0455	-0.0301667	-0.00383333			1.75		-0.0395	-0.0044	0.0126667	-0.0295	-0.0473333	-0.02	-0.00283333												1.75		-0.0235	-0.0218333	0.012	-0.00933333	-0.0133333	0.0203333	-0.0134783				1.75		-0.0173333	0.0175	-0.13975	0.019	-0.011
1.76		0.045	-0.0045	-0.005	0.00083333	-0.0455	-0.0301667	-0.00383333			1.76		-0.00616667	0.0556	-0.0206667	0.00383333	-0.0473333	-0.0533333	0.0305												1.76		0.00983333	0.0115	0.012	0.124	-0.0133333	-0.013	0.03				1.76		-0.0173333	0.0175	-0.03975	0.019	-0.011
1.77		-0.0216667	-0.0045	-0.0383333	0.00083333	-0.0455	-0.0301667	-0.00383333			1.77		0.0271667	-0.0244	0.046	0.00383333	-0.0473333	-0.0533333	-0.00283333												1.77		0.0431667	0.0448333	-0.138	-0.00933333	0.02	-0.013	0.03				1.77		0.0493333	0.0175	0.21025	-0.0143333	0.0223333
1.78		0.0116667	-0.0045	-0.005	-0.0325	-0.0455	-0.0301667	0.0295			1.78		-0.00616667	0.0156	0.0126667	-0.0295	-0.0473333	-0.0533333	0.0305												1.78		0.0431667	0.0115	0.012	0.024	0.0533333	-0.013	-0.0134783				1.78		0.016	0.0508333	0.06025	0.0523333	-0.011
1.79		0.0783333	-0.0045	0.095	-0.0325	-0.0455	0.00316667	-0.00383333			1.79		-0.00616667	0.0156	0.046	-0.0295	-0.0473333	0.0466667	0.0305												1.79		0.109833	-0.0218333	0.112	-0.00933333	0.02	0.0203333	-0.0134783				1.79		0.016	-0.0158333	-0.08975	0.019	-0.011
1.8		0.045	-0.0045	-0.005	-0.0325	-0.0455	0.0698333	-0.00383333			1.8		-0.00616667	0.0156	-0.0206667	-0.0295	-0.014	0.0466667	0.0305												1.8		0.0431667	0.0115	-0.138	0.190667	0.02	-0.013	-0.0134783				1.8		0.0826667	-0.0158333	-0.13975	0.0856667	-0.011
1.81		0.0116667	-0.0045	-0.005	-0.0325	-0.0455	0.00316667	0.0295			1.81		-0.0395	-0.0044	0.0126667	0.00383333	-0.0473333	-0.0533333	0.0305												1.81		0.00983333	0.0115	-0.038	-0.109333	-0.0133333	-0.013	-0.0134783				1.81		-0.0173333	-0.0158333	0.11025	0.0856667	0.0223333
1.82		0.045	-0.0045	0.0283333	-0.0325	-0.0455	-0.0301667	-0.00383333			1.82		0.0271667	-0.0044	0.0126667	-0.0295	-0.0473333	-0.0533333	-0.00283333												1.82		0.0431667	0.0115	0.062	0.0906667	0.02	-0.013	0.03				1.82		0.0493333	0.0175	0.11025	-0.114333	-0.011
1.83		0.0116667	-0.0045	-0.005	-0.0325	-0.0121667	-0.0301667	-0.00383333			1.83		-0.0395	-0.0244	0.0793333	-0.0295	-0.0473333	-0.0533333	0.0305												1.83		0.0765	0.0115	0.012	-0.0426667	0.02	-0.013	0.03				1.83		0.0493333	0.0841667	0.06025	0.152333	-0.011
1.84		0.0116667	0.0155	-0.0383333	-0.0325	-0.0121667	-0.0301667	-0.00383333			1.84		-0.00616667	-0.0244	0.046	-0.0295	-0.0473333	-0.02	0.0305												1.84		0.0431667	0.0115	-0.138	0.0573333	0.02	-0.013	-0.0134783				1.84		0.0826667	-0.0158333	0.01025	-0.114333	-0.011
1.85		0.0116667	-0.0045	-0.005	-0.0325	-0.0121667	0.00316667	-0.00383333			1.85		-0.00616667	-0.0244	-0.0206667	-0.0295	-0.0473333	-0.02	-0.00283333												1.85		0.00983333	-0.0218333	0.012	-0.0426667	0.02	-0.013	-0.0134783				1.85		0.016	-0.0158333	-0.03975	-0.0143333	-0.011
1.86		-0.0216667	-0.0045	0.0283333	-0.0325	-0.0121667	-0.0301667	-0.00383333			1.86		0.0271667	-0.0044	0.0126667	-0.0295	-0.0473333	-0.0533333	-0.00283333												1.86		0.0431667	0.0115	-0.138	-0.076	-0.0133333	-0.013	-0.0134783				1.86		-0.0506667	0.0175	0.16025	0.152333	-0.011
1.87		0.0116667	-0.0045	0.0283333	0.00083333	-0.0455	-0.0301667	-0.00383333			1.87		-0.00616667	-0.0244	0.0126667	-0.0295	0.0193333	-0.0533333	-0.00283333												1.87		0.143167	0.0115	-0.188	0.024	-0.0133333	-0.013	0.0734783				1.87		0.0493333	0.0175	0.01025	0.019	-0.011
1.88		0.0116667	0.0355	0.0616667	0.0341667	-0.0455	-0.0301667	0.0295			1.88		-0.0395	-0.0044	-0.0206667	0.0371667	-0.014	-0.0533333	-0.00283333												1.88		0.0431667	0.0115	0.112	-0.0426667	-0.0133333	0.0203333	-0.0134783				1.88		-0.0173333	-0.0158333	-0.03975	-0.081	-0.011
1.89		0.0116667	-0.0045	-0.0383333	0.0341667	0.0545	-0.0301667	0.0628333			1.89		-0.00616667	0.0356	0.0126667	0.00383333	-0.014	-0.0533333	-0.00283333												1.89		0.0431667	0.0115	0.062	-0.076	-0.0133333	-0.013	-0.0134783				1.89		0.016	-0.0158333	0.06025	0.019	-0.011
1.9		-0.0216667	-0.0045	-0.0383333	-0.0325	-0.0121667	-0.0301667	-0.00383333			1.9		-0.00616667	-0.0044	0.046	0.00383333	-0.014	-0.0533333	0.0305												1.9		0.0765	0.0448333	-0.088	0.157333	-0.0133333	-0.013	0.03				1.9		0.016	-0.0158333	0.06025	-0.0143333	-0.011
1.91		-0.0216667	0.0155	0.0283333	-0.0325	0.0211667	-0.0301667	0.0295			1.91		-0.0395	-0.0244	-0.0206667	-0.0295	-0.0473333	-0.0533333	0.0305												1.91		0.0431667	-0.0218333	0.112	-0.076	-0.0133333	-0.013	0.0734783				1.91		0.0826667	-0.0158333	-0.18975	0.019	-0.011
1.92		0.0116667	-0.0045	0.0283333	-0.0325	-0.0455	-0.0301667	-0.00383333			1.92		-0.00616667	-0.0044	-0.0206667	-0.0295	-0.014	-0.0533333	-0.00283333												1.92		0.0765	-0.0218333	0.012	-0.00933333	-0.0133333	-0.013	0.03				1.92		-0.0173333	0.0175	0.06025	-0.0476667	-0.011
1.93		-0.0216667	-0.0045	-0.0383333	0.0675	-0.0455	-0.0301667	-0.00383333			1.93		-0.0395	-0.0244	-0.0206667	0.00383333	-0.0473333	-0.0533333	0.0305												1.93		0.0431667	-0.0218333	0.062	-0.00933333	-0.0133333	-0.013	0.03				1.93		-0.0173333	-0.0158333	0.16025	0.119	-0.011
1.94		-0.0216667	-0.0045	-0.005	0.00083333	-0.0455	-0.0301667	0.0295			1.94		-0.00616667	-0.0244	-0.0206667	-0.0295	-0.0473333	-0.0533333	0.0305												1.94		0.0765	-0.0218333	0.012	-0.076	-0.0133333	0.0203333	0.03				1.94		0.0493333	-0.0158333	0.11025	-0.081	-0.011
1.95		-0.0216667	-0.0045	-0.005	0.00083333	-0.0455	-0.0301667	-0.00383333			1.95		-0.00616667	-0.0244	0.0126667	0.0371667	-0.0473333	0.0466667	-0.00283333												1.95		-0.0568333	-0.0218333	-0.088	0.0906667	-0.0133333	0.0203333	0.03				1.95		0.0493333	-0.0158333	-0.13975	0.0523333	0.0556667
1.96		0.111667	-0.0045	-0.005	-0.0325	-0.0121667	-0.0301667	0.0295			1.96		0.0271667	-0.0244	0.0126667	0.0371667	-0.0473333	-0.0533333	-0.00283333												1.96		0.00983333	0.0448333	-0.038	-0.076	0.02	0.0203333	-0.0134783				1.96		0.0493333	0.0175	-0.13975	-0.0476667	0.089
1.97		-0.0216667	-0.0045	-0.0383333	-0.0325	-0.0455	-0.0301667	-0.00383333			1.97		0.127167	-0.0044	-0.0206667	-0.0295	-0.014	-0.0533333	0.0305												1.97		0.0431667	0.0115	-0.188	-0.076	-0.0133333	0.0203333	-0.0134783				1.97		0.016	-0.0158333	0.21025	0.0523333	0.0556667
1.98		0.0116667	-0.0045	0.0283333	-0.0325	-0.0121667	-0.0301667	-0.00383333			1.98		0.0271667	-0.0244	0.0126667	-0.0295	-0.0473333	-0.0533333	-0.00283333												1.98		0.109833	-0.0218333	-0.038	-0.00933333	-0.0133333	-0.013	0.03				1.98		0.116	-0.0158333	-0.08975	0.0523333	0.0223333
1.99		0.0116667	0.0155	-0.005	0.00083333	-0.0455	-0.0301667	-0.00383333			1.99		-0.00616667	-0.0244	-0.0206667	-0.0295	-0.0473333	-0.0533333	-0.00283333												1.99		0.0765	-0.0218333	0.062	-0.0426667	-0.0133333	-0.013	-0.0134783				1.99		0.0493333	0.0175	0.01025	-0.0143333	0.0223333
2		0.0116667	-0.0045	-0.0383333	-0.0325	-0.0455	-0.0301667	-0.00383333			2		-0.00616667	0.0156	0.0793333	-0.0295	-0.0473333	0.0466667	-0.00283333												2		-0.0235	0.0115	-0.188	0.124	-0.0133333	-0.013	-0.0134783				2		0.0493333	-0.0158333	0.21025	0.019	-0.011
2.01		0.0116667	0.0155	-0.005	-0.0325	-0.0455	-0.0301667	0.0295			2.01		0.0938333	-0.0044	-0.0206667	-0.0295	-0.0473333	0.0466667	-0.00283333												2.01		-0.0235	-0.0218333	-0.038	-0.00933333	-0.0133333	-0.013	-0.0134783				2.01		0.0493333	0.0175	0.01025	0.152333	0.0223333
2.02		0.0783333	0.0155	0.0616667	-0.0325	-0.0121667	-0.0301667	-0.00383333			2.02		-0.00616667	-0.0044	0.0126667	0.00383333	-0.0473333	-0.0533333	-0.00283333												2.02		0.1765	-0.0218333	0.112	0.024	0.02	-0.013	-0.0134783				2.02		0.016	-0.0158333	-0.03975	-0.0476667	0.0223333
2.03		-0.0216667	-0.0045	-0.005	-0.0325	-0.0455	0.00316667	-0.00383333			2.03		-0.00616667	-0.0244	-0.0206667	-0.0295	0.0193333	-0.0533333	-0.00283333												2.03		0.00983333	0.0448333	-0.088	0.0906667	0.02	0.0203333	-0.0134783				2.03		0.016	0.0508333	-0.03975	-0.0476667	-0.011
2.04		-0.0216667	-0.0045	0.0283333	-0.0325	-0.0455	0.0365	0.0295			2.04		0.0271667	-0.0244	-0.0206667	-0.0295	-0.0473333	-0.02	-0.00283333												2.04		0.0431667	0.0115	0.112	-0.0426667	0.02	-0.013	-0.0134783				2.04		0.0493333	-0.0158333	-0.08975	0.0856667	0.0223333
2.05		0.0116667	-0.0045	0.128333	0.00083333	-0.0455	-0.0301667	-0.00383333			2.05		-0.0395	0.0756	0.0126667	0.00383333	-0.0473333	0.113333	0.0305												2.05		-0.0235	0.0115	-0.238	0.157333	-0.0133333	-0.013	0.0734783				2.05		0.016	0.0175	0.01025	-0.0476667	-0.011
2.06		-0.0216667	0.0355	-0.005	-0.0325	-0.0455	-0.0301667	0.0295			2.06		-0.00616667	0.0156	0.0126667	-0.0295	-0.0473333	-0.02	0.0305												2.06		0.00983333	-0.0218333	0.012	-0.00933333	-0.0133333	0.0203333	0.03				2.06		0.016	-0.0158333	0.01025	-0.0476667	0.0223333
2.07		-0.0216667	-0.0045	-0.005	-0.0325	-0.0455	-0.0301667	-0.00383333			2.07		0.0271667	-0.0244	-0.0206667	0.0371667	0.0193333	0.08	-0.00283333												2.07		0.109833	0.0115	-0.138	-0.00933333	-0.0133333	-0.013	0.03				2.07		0.0826667	0.0841667	-0.08975	0.0523333	-0.011
2.08		0.0116667	-0.0045	-0.005	-0.0325	-0.0121667	-0.0301667	0.0295			2.08		0.127167	0.0156	0.0126667	0.0371667	0.0526667	-0.02	-0.00283333												2.08		0.0765	0.0115	-0.038	-0.00933333	-0.0133333	-0.013	0.03				2.08		-0.0506667	0.0175	0.06025	-0.0143333	-0.011
2.09		0.0116667	0.0155	-0.0383333	-0.0325	-0.0455	-0.0301667	-0.00383333			2.09		0.0605	-0.0044	0.0126667	0.00383333	-0.0473333	-0.0533333	-0.00283333												2.09		0.0431667	0.0115	0.162	0.0573333	-0.0133333	-0.013	-0.0134783				2.09		-0.0506667	0.0175	0.01025	0.019	-0.011
2.1		0.0116667	-0.0045	-0.0383333	-0.0325	-0.0121667	0.0365	-0.00383333			2.1		0.0605	-0.0044	0.0126667	-0.0295	-0.0473333	-0.0533333	-0.00283333												2.1		-0.0235	-0.0218333	-0.138	0.024	-0.0133333	-0.013	0.0734783				2.1		0.016	-0.0158333	-0.08975	-0.081	-0.011
2.11		-0.0216667	-0.0045	-0.0383333	-0.0325	0.0211667	0.00316667	0.0295			2.11		0.0271667	-0.0244	0.0126667	-0.0295	-0.0473333	-0.0533333	0.0305												2.11		0.00983333	-0.0218333	0.212	-0.00933333	-0.0133333	0.0203333	0.03				2.11		-0.0506667	-0.0158333	0.06025	0.019	-0.011
2.12		0.0116667	-0.0045	0.0283333	-0.0325	-0.0455	0.00316667	-0.00383333			2.12		0.0271667	-0.0244	0.0126667	0.00383333	0.0526667	-0.02	0.0638333												2.12		-0.0235	-0.0218333	-0.088	-0.00933333	-0.0133333	-0.013	-0.0134783				2.12		-0.0506667	0.0508333	0.11025	0.0856667	-0.011
2.13		-0.0216667	0.0355	-0.0383333	-0.0325	-0.0121667	0.00316667	0.0295			2.13		-0.00616667	0.0156	-0.0206667	-0.0295	-0.0473333	0.0133333	-0.00283333												2.13		0.0431667	0.0115	0.012	0.024	-0.0133333	-0.013	-0.0134783				2.13		-0.0506667	0.0175	-0.08975	-0.0143333	-0.011
2.14		0.0116667	-0.0045	-0.005	-0.0325	-0.0455	0.0698333	-0.00383333			2.14		-0.00616667	-0.0244	0.046	-0.0295	-0.0473333	0.0133333	-0.00283333												2.14		-0.0235	-0.0218333	-0.138	0.024	0.02	-0.013	0.03				2.14		0.016	-0.0158333	0.16025	0.0523333	0.0223333
2.15		-0.0216667	-0.0045	0.095	0.00083333	-0.0455	-0.0301667	-0.00383333			2.15		-0.00616667	-0.0244	0.0126667	-0.0295	-0.0473333	0.0133333	-0.00283333												2.15		0.00983333	0.0115	-0.088	0.124	-0.0133333	0.0203333	-0.0134783				2.15		-0.0506667	-0.0158333	-0.08975	-0.0143333	-0.011
2.16		-0.0216667	-0.0045	-0.005	0.00083333	-0.0121667	-0.0301667	-0.00383333			2.16		0.0271667	0.0156	-0.0206667	0.00383333	-0.0473333	0.0466667	-0.00283333												2.16		0.00983333	-0.0218333	-0.088	-0.109333	-0.0133333	0.0203333	0.0734783				2.16		-0.0506667	-0.0158333	0.16025	0.0523333	-0.011
2.17		-0.0216667	0.0155	-0.0383333	-0.0325	0.0211667	-0.0301667	-0.00383333			2.17		0.0605	-0.0244	0.046	-0.0295	-0.0473333	0.0466667	0.0305												2.17		-0.0235	-0.0218333	0.012	-0.0426667	-0.0133333	-0.013	-0.0134783				2.17		0.016	-0.0158333	-0.03975	0.019	0.0223333
2.18		0.0116667	-0.0045	-0.005	-0.0325	0.0878333	-0.0301667	-0.00383333			2.18		0.0271667	-0.0244	0.0126667	0.00383333	0.0526667	-0.0533333	-0.00283333												2.18		-0.0235	-0.0218333	-0.138	0.024	-0.0133333	-0.013	-0.0134783				2.18		-0.0173333	-0.0158333	-0.03975	0.019	-0.011
2.19		0.0116667	0.0155	0.0283333	-0.0325	0.0211667	-0.0301667	-0.00383333			2.19		-0.00616667	-0.0244	0.0126667	0.00383333	-0.014	0.0133333	-0.00283333												2.19		-0.0568333	0.0448333	0.112	-0.00933333	0.02	0.0203333	-0.0134783				2.19		-0.0506667	-0.0158333	0.11025	-0.0476667	-0.011
2.2		0.0116667	-0.0045	0.0283333	-0.0325	-0.0455	-0.0301667	0.0628333			2.2		-0.0395	-0.0044	0.0126667	0.00383333	-0.014	-0.0533333	-0.00283333												2.2		-0.0235	0.0115	-0.088	-0.076	-0.0133333	-0.013	-0.0134783				2.2		-0.0506667	0.0175	-0.13975	0.0856667	-0.011
2.21		-0.0216667	-0.0045	0.0283333	-0.0325	-0.0455	-0.0301667	-0.00383333			2.21		-0.00616667	-0.0044	0.0126667	-0.0295	-0.0473333	0.113333	-0.00283333												2.21		0.0431667	-0.0218333	0.012	0.024	-0.0133333	0.0203333	-0.0134783				2.21		0.016	-0.0158333	0.01025	-0.0476667	-0.011
2.22		0.045	-0.0045	0.0283333	0.00083333	-0.0455	0.0698333	-0.00383333			2.22		0.0271667	-0.0044	-0.0206667	0.00383333	-0.0473333	0.0466667	0.0305												2.22		-0.0235	0.0115	-0.038	-0.109333	-0.0133333	-0.013	-0.0134783				2.22		0.0493333	-0.0158333	0.21025	0.0856667	0.089
2.23		0.0783333	-0.0045	0.095	0.0341667	-0.0455	0.00316667	-0.00383333			2.23		0.0271667	-0.0044	0.0126667	-0.0295	-0.0473333	-0.0533333	-0.00283333												2.23		-0.0235	0.0115	0.012	-0.0426667	0.02	-0.013	-0.0134783				2.23		0.016	-0.0158333	0.16025	-0.081	-0.011
2.24		0.0116667	-0.0045	-0.005	-0.0325	-0.0455	-0.0301667	-0.00383333			2.24		0.0271667	0.0156	-0.0206667	-0.0295	0.0193333	0.08	-0.00283333												2.24		-0.0568333	-0.0218333	0.212	0.0573333	-0.0133333	-0.013	-0.0134783				2.24		-0.0506667	-0.0158333	-0.03975	0.0523333	-0.011
2.25		0.0116667	-0.0045	-0.0383333	0.0341667	-0.0455	-0.0301667	-0.00383333			2.25		0.0605	0.0356	0.0126667	-0.0295	0.0193333	-0.0533333	-0.00283333												2.25		-0.0568333	-0.0218333	-0.088	-0.076	-0.0133333	-0.013	-0.0134783				2.25		-0.0173333	-0.0158333	0.01025	-0.081	-0.011
2.26		-0.0216667	-0.0045	-0.0383333	0.00083333	-0.0121667	0.00316667	-0.00383333			2.26		-0.0395	-0.0244	0.0126667	-0.0295	-0.0473333	0.08	-0.00283333												2.26		0.00983333	0.0115	-0.088	0.0573333	-0.0133333	-0.013	0.03				2.26		-0.0506667	-0.0158333	0.06025	0.152333	0.0223333
2.27		0.0116667	0.0155	0.0283333	0.00083333	0.0211667	0.0698333	-0.00383333			2.27		0.0938333	-0.0044	-0.0206667	-0.0295	-0.014	0.0466667	-0.00283333												2.27		-0.0235	0.0115	0.162	-0.00933333	-0.0133333	0.0203333	0.03				2.27		-0.0506667	0.0175	0.21025	-0.0476667	-0.011
2.28		-0.0216667	-0.0045	-0.005	-0.0325	-0.0455	-0.0301667	0.0295			2.28		-0.00616667	-0.0244	0.0126667	0.00383333	0.0193333	-0.02	-0.00283333												2.28		0.00983333	-0.0218333	0.112	0.024	-0.0133333	-0.013	0.03				2.28		0.0493333	-0.0158333	0.01025	-0.081	-0.011
2.29		0.0783333	-0.0045	0.0283333	-0.0325	0.0545	-0.0301667	-0.00383333			2.29		-0.0395	-0.0244	0.046	0.00383333	0.0193333	-0.0533333	-0.00283333												2.29		-0.0568333	-0.0218333	-0.038	0.0906667	-0.0133333	0.087	-0.0134783				2.29		0.0493333	-0.0158333	0.06025	0.019	0.0223333
2.3		-0.0216667	-0.0045	-0.005	0.0341667	-0.0455	0.00316667	-0.00383333			2.3		-0.00616667	0.0156	0.0126667	0.0371667	-0.014	-0.0533333	-0.00283333												2.3		0.00983333	0.0448333	-0.088	0.124	-0.0133333	-0.013	-0.0134783				2.3		0.016	-0.0158333	0.01025	0.119	-0.011
2.31		-0.0216667	0.0155	-0.005	0.00083333	-0.0455	0.0698333	0.0295			2.31		0.127167	0.0156	0.046	0.00383333	-0.0473333	-0.0533333	-0.00283333												2.31		-0.0235	-0.0218333	-0.038	-0.076	0.02	0.0203333	0.03				2.31		-0.0173333	-0.0158333	-0.03975	-0.0143333	-0.011
2.32		-0.0216667	-0.0045	-0.0383333	-0.0325	-0.0121667	0.00316667	-0.00383333			2.32		-0.0395	-0.0244	0.0126667	0.00383333	-0.0473333	-0.0533333	-0.00283333												2.32		0.0431667	-0.0218333	0.162	-0.00933333	0.0866667	0.0536667	-0.0134783				2.32		-0.0506667	-0.0158333	0.06025	0.019	-0.011
2.33		-0.0216667	-0.0045	-0.005	-0.0325	-0.0121667	-0.0301667	-0.00383333			2.33		-0.00616667	-0.0044	0.046	-0.0295	0.0193333	-0.0533333	-0.00283333												2.33		-0.0568333	0.0448333	-0.038	-0.00933333	0.0866667	-0.013	0.03				2.33		0.016	-0.0158333	-0.18975	0.0523333	0.0556667
2.34		0.0116667	-0.0045	-0.005	-0.0325	-0.0121667	-0.0301667	-0.00383333			2.34		0.0605	0.0156	-0.0206667	-0.0295	0.0526667	0.0133333	-0.00283333												2.34		-0.0235	0.0115	-0.088	0.024	0.0533333	0.0203333	0.03				2.34		0.016	-0.0158333	0.21025	0.0856667	-0.011
2.35		-0.0216667	-0.0045	-0.005	-0.0325	-0.0121667	-0.0301667	-0.00383333			2.35		0.0938333	-0.0244	0.0126667	-0.0295	-0.014	0.0466667	-0.00283333												2.35		-0.0568333	-0.0218333	0.012	-0.076	0.02	0.0536667	-0.0134783				2.35		-0.0506667	-0.0158333	-0.08975	-0.0476667	-0.011
2.36		-0.0216667	-0.0045	0.0616667	-0.0325	0.0211667	-0.0301667	-0.00383333			2.36		0.0605	-0.0244	0.046	-0.0295	-0.0473333	0.0466667	-0.00283333												2.36		-0.0235	0.0115	-0.088	-0.109333	-0.0133333	-0.013	-0.0134783				2.36		0.0493333	-0.0158333	0.01025	0.0856667	-0.011
2.37		0.045	-0.0045	0.0283333	-0.0325	0.0545	-0.0301667	0.0295			2.37		-0.00616667	0.0356	0.0126667	-0.0295	-0.0473333	-0.02	-0.00283333												2.37		-0.0235	-0.0218333	0.212	0.0573333	-0.0133333	-0.013	0.0734783				2.37		-0.0173333	-0.0158333	-0.03975	0.0856667	0.0223333
2.38		0.0116667	0.0155	0.0283333	-0.0325	-0.0121667	-0.0301667	-0.00383333			2.38		0.127167	-0.0044	0.0126667	0.00383333	-0.0473333	-0.0533333	-0.00283333												2.38		0.00983333	-0.0218333	-0.088	0.0573333	-0.0133333	-0.013	0.03				2.38		-0.0173333	0.0175	0.11025	-0.0143333	-0.011
2.39		0.0116667	0.0355	-0.005	0.0675	0.0545	-0.0301667	-0.00383333			2.39		0.0605	-0.0044	-0.0206667	0.0371667	-0.0473333	-0.0533333	-0.00283333												2.39		-0.0568333	-0.0218333	-0.038	-0.109333	-0.0133333	0.0203333	0.116957				2.39		-0.0173333	-0.0158333	0.01025	0.119	-0.011
2.4		-0.0216667	-0.0045	-0.005	0.00083333	0.121167	-0.0301667	0.0628333			2.4		-0.0395	-0.0244	-0.0206667	0.00383333	-0.014	-0.0533333	-0.00283333												2.4		-0.0235	0.0115	0.212	-0.0426667	0.02	-0.013	0.03				2.4		0.016	-0.0158333	0.31025	0.0856667	-0.011
2.41		-0.0216667	-0.0045	-0.0383333	-0.0325	-0.0121667	0.00316667	0.0295			2.41		-0.00616667	-0.0044	-0.0206667	-0.0295	0.0193333	0.0133333	-0.00283333												2.41		-0.0235	0.0448333	0.012	-0.00933333	-0.0133333	-0.013	-0.0134783				2.41		-0.0173333	0.0508333	-0.03975	-0.081	-0.011
2.42		0.0116667	0.0155	-0.005	-0.0325	0.0211667	0.0365	-0.00383333			2.42		-0.0395	-0.0044	-0.0206667	0.0705	-0.0473333	-0.02	-0.00283333												2.42		-0.0235	-0.0218333	-0.238	0.024	-0.0133333	-0.013	0.0734783				2.42		-0.0506667	-0.0158333	-0.03975	-0.0476667	0.0556667
2.43		0.0116667	-0.0045	-0.005	0.1675	0.0545	-0.0301667	-0.00383333			2.43		-0.0395	-0.0244	-0.0206667	-0.0295	-0.0473333	-0.0533333	-0.00283333												2.43		0.00983333	-0.0218333	0.112	0.024	-0.0133333	-0.013	0.03				2.43		-0.0173333	-0.0158333	-0.03975	-0.0476667	-0.011
2.44		0.0116667	-0.0045	-0.0383333	0.100833	0.0211667	-0.0301667	-0.00383333			2.44		0.0605	0.0156	-0.0206667	0.00383333	-0.0473333	-0.0533333	0.0305												2.44		-0.0235	0.0115	0.012	-0.076	-0.0133333	0.0203333	0.03				2.44		-0.0173333	-0.0158333	-0.03975	-0.0143333	0.0223333
2.45		-0.0216667	0.0155	-0.005	0.100833	-0.0121667	-0.0301667	-0.00383333			2.45		-0.00616667	-0.0044	0.046	0.00383333	0.0193333	-0.0533333	-0.00283333												2.45		-0.0235	-0.0218333	-0.038	0.0906667	-0.0133333	-0.013	0.03				2.45		0.016	0.0508333	-0.08975	0.285667	0.0223333
2.46		-0.0216667	-0.0045	-0.005	0.0341667	0.0878333	0.0698333	-0.00383333			2.46		-0.0395	-0.0044	-0.0206667	-0.0295	0.0193333	-0.0533333	-0.00283333												2.46		-0.0568333	0.0115	0.012	-0.0426667	0.02	-0.013	0.03				2.46		-0.0173333	0.0175	0.16025	-0.114333	-0.011
2.47		0.0116667	-0.0045	0.0283333	-0.0325	0.0878333	0.00316667	-0.00383333			2.47		0.0271667	0.0356	-0.0206667	-0.0295	-0.014	0.146667	-0.00283333												2.47		-0.0235	0.0115	0.012	0.0573333	-0.0133333	-0.013	0.0734783				2.47		-0.0506667	0.0175	0.01025	-0.0476667	-0.011
2.48		0.0116667	-0.0045	0.0616667	-0.0325	0.0878333	-0.0301667	-0.00383333			2.48		0.0271667	-0.0244	0.0126667	-0.0295	-0.0473333	0.08	-0.00283333												2.48		-0.0568333	0.0115	-0.138	0.0573333	-0.0133333	0.0203333	-0.0134783				2.48		-0.0173333	-0.0158333	0.11025	0.019	-0.011
2.49		-0.0216667	0.0155	-0.0383333	0.00083333	-0.0121667	-0.0301667	-0.00383333			2.49		0.0271667	-0.0044	0.0126667	-0.0295	-0.0473333	0.08	-0.00283333												2.49		0.0765	0.0115	0.062	-0.0426667	0.02	-0.013	-0.0134783				2.49		-0.0506667	0.0175	0.01025	0.019	-0.011
2.5		0.0116667	0.0155	0.0616667	-0.0325	-0.0455	-0.0301667	-0.00383333			2.5		-0.0395	0.0156	0.0793333	-0.0295	-0.0473333	-0.02	-0.00283333												2.5		-0.0568333	0.0115	0.212	0.024	0.02	0.0203333	0.03				2.5		-0.0173333	0.0175	-0.03975	0.019	0.0223333
2.51		-0.0216667	-0.0045	0.0616667	-0.0325	-0.0455	-0.0301667	-0.00383333			2.51		0.0271667	-0.0244	-0.0206667	-0.0295	-0.0473333	-0.0533333	0.0305												2.51		-0.0235	0.0115	0.012	0.024	-0.0133333	-0.013	0.03				2.51		-0.0173333	-0.0158333	-0.18975	0.019	-0.011
2.52		0.0116667	-0.0045	-0.0383333	-0.0325	0.0211667	-0.0301667	-0.00383333			2.52		-0.0395	0.0156	-0.0206667	0.0371667	0.0193333	-0.0533333	-0.00283333												2.52		-0.0235	-0.0218333	0.212	0.024	-0.0133333	-0.013	-0.0134783				2.52		-0.0506667	0.0175	0.11025	-0.081	-0.011
2.53		-0.0216667	-0.0045	-0.0383333	-0.0325	-0.0121667	-0.0301667	-0.00383333			2.53		-0.00616667	-0.0244	-0.0206667	0.0371667	-0.0473333	-0.02	-0.00283333												2.53		0.00983333	-0.0218333	0.212	-0.00933333	-0.0133333	-0.013	0.03				2.53		-0.0173333	-0.0158333	-0.08975	0.0523333	-0.011
2.54		0.0116667	0.0155	-0.005	-0.0325	-0.0121667	-0.0301667	-0.00383333			2.54		0.0605	-0.0044	-0.0206667	0.00383333	-0.0473333	0.0466667	-0.00283333												2.54		-0.0568333	-0.0218333	-0.188	0.024	-0.0133333	-0.013	0.03				2.54		-0.0506667	0.0508333	0.36025	-0.0143333	-0.011
2.55		-0.0216667	0.0155	0.0283333	0.0341667	-0.0455	-0.0301667	-0.00383333			2.55		-0.0395	-0.0044	0.0126667	0.137167	-0.0473333	0.08	-0.00283333												2.55		-0.0235	-0.0218333	0.062	-0.00933333	-0.0133333	0.0203333	0.03				2.55		0.016	-0.0158333	0.01025	0.019	-0.011
2.56		-0.0216667	-0.0045	-0.005	0.0675	-0.0121667	-0.0301667	-0.00383333			2.56		-0.0395	0.0156	0.0126667	0.0705	-0.0473333	0.0133333	-0.00283333												2.56		0.00983333	-0.0218333	-0.038	0.024	-0.0133333	-0.013	-0.0134783				2.56		0.016	0.0175	-0.03975	-0.0143333	-0.011
2.57		0.0116667	-0.0045	-0.005	-0.0325	0.0211667	-0.0301667	-0.00383333			2.57		0.0271667	-0.0244	-0.0206667	-0.0295	-0.0473333	-0.0533333	-0.00283333												2.57		-0.0235	0.0115	0.162	0.024	-0.0133333	-0.013	-0.0134783				2.57		-0.0173333	0.0175	-0.08975	-0.147667	-0.011
2.58		0.045	-0.0045	0.0616667	-0.0325	-0.0455	-0.0301667	-0.00383333			2.58		0.0938333	-0.0044	-0.0206667	0.00383333	-0.0473333	-0.02	-0.00283333												2.58		-0.0568333	0.0115	0.012	0.157333	0.02	-0.013	-0.0134783				2.58		0.016	-0.0158333	0.26025	0.152333	-0.011
2.59		-0.0216667	0.0355	-0.005	-0.0325	-0.0455	-0.0301667	-0.00383333			2.59		0.0271667	-0.0044	-0.0206667	0.0705	-0.0473333	0.0466667	-0.00283333												2.59		-0.0235	-0.0218333	0.062	-0.00933333	0.02	-0.013	0.03				2.59		-0.0173333	0.0175	-0.28975	-0.0143333	-0.011
2.6		0.0783333	-0.0045	0.0283333	-0.0325	-0.0455	0.0365	-0.00383333			2.6		-0.0395	-0.0244	-0.0206667	0.00383333	-0.0473333	-0.02	0.0305												2.6		0.00983333	-0.0218333	-0.038	-0.109333	0.02	0.0203333	-0.0134783				2.6		0.116	-0.0158333	0.01025	-0.0476667	-0.011
2.61		-0.0216667	0.0555	-0.0383333	0.00083333	-0.0455	0.1365	-0.00383333			2.61		-0.0395	-0.0044	0.0126667	0.00383333	-0.0473333	0.0466667	-0.00283333												2.61		0.0431667	-0.0218333	-0.038	-0.109333	-0.0133333	0.0203333	-0.0134783				2.61		-0.0506667	-0.0158333	-0.08975	0.252333	-0.011
2.62		-0.0216667	-0.0045	-0.0383333	0.0675	0.0878333	0.0365	-0.00383333			2.62		0.0271667	0.0356	0.046	-0.0295	-0.0473333	0.08	-0.00283333												2.62		0.00983333	-0.0218333	-0.088	0.024	-0.0133333	-0.013	-0.0134783				2.62		-0.0173333	0.0175	0.11025	-0.114333	-0.011
2.63		-0.0216667	0.0155	-0.0383333	-0.0325	0.0211667	-0.0301667	-0.00383333			2.63		0.0605	-0.0244	-0.0206667	0.00383333	-0.0473333	0.0466667	-0.00283333												2.63		-0.0568333	-0.0218333	-0.188	0.0573333	-0.0133333	-0.013	0.03				2.63		0.016	-0.0158333	-0.03975	0.019	-0.011
2.64		-0.0216667	0.0155	0.0283333	-0.0325	0.0211667	0.00316667	-0.00383333			2.64		-0.00616667	-0.0244	0.046	-0.0295	0.0193333	-0.02	-0.00283333												2.64		-0.0235	0.0448333	-0.038	0.0573333	-0.0133333	-0.013	0.03				2.64		-0.0173333	0.0175	0.06025	0.119	-0.011
2.65		0.0116667	-0.0045	0.0283333	0.100833	-0.0121667	0.0365	-0.00383333			2.65		0.0271667	-0.0244	-0.0206667	0.00383333	0.0193333	0.18	-0.00283333												2.65		0.00983333	-0.0218333	0.112	-0.076	-0.0133333	-0.013	-0.0134783				2.65		0.016	0.0175	0.06025	0.0523333	-0.011
2.66		-0.0216667	-0.0045	-0.0383333	0.00083333	0.187833	0.0365	-0.00383333			2.66		0.0605	-0.0244	0.046	0.0371667	-0.0473333	0.0133333	-0.00283333												2.66		-0.0568333	-0.0218333	0.112	-0.0426667	0.0533333	-0.013	-0.0134783				2.66		-0.0173333	-0.0158333	0.06025	-0.0143333	-0.011
2.67		0.0116667	-0.0045	-0.0383333	-0.0325	0.187833	0.00316667	-0.00383333			2.67		-0.00616667	-0.0044	0.112667	0.0371667	-0.0473333	0.0133333	-0.00283333												2.67		-0.0235	-0.0218333	-0.088	0.024	-0.0133333	-0.013	-0.0134783				2.67		-0.0173333	0.0175	-0.13975	-0.0143333	-0.011
2.68		0.045	-0.0045	-0.005	-0.0325	-0.0455	-0.0301667	-0.00383333			2.68		-0.00616667	0.0356	0.046	0.00383333	-0.0473333	-0.0533333	0.0305												2.68		0.0431667	0.0115	0.012	-0.109333	-0.0133333	-0.013	0.03				2.68		-0.0506667	0.0841667	0.11025	0.119	-0.011
2.69		0.0116667	-0.0045	-0.0383333	0.0675	-0.0455	-0.0301667	-0.00383333			2.69		-0.0395	-0.0244	0.0126667	0.00383333	-0.0473333	-0.0533333	-0.00283333												2.69		-0.0568333	0.0448333	0.012	0.0906667	-0.0133333	0.0203333	0.0734783				2.69		-0.0506667	0.0175	-0.08975	-0.114333	0.0223333
2.7		-0.0216667	-0.0045	0.0283333	0.0341667	-0.0455	-0.0301667	-0.00383333			2.7		0.0605	-0.0244	-0.0206667	0.00383333	-0.0473333	-0.02	-0.00283333												2.7		-0.0235	0.0115	0.162	-0.109333	-0.0133333	-0.013	0.03				2.7		-0.0506667	0.0175	-0.03975	0.0523333	0.0223333
2.71		-0.0216667	-0.0045	-0.0383333	-0.0325	0.0211667	-0.0301667	-0.00383333			2.71		0.0938333	0.0756	-0.0206667	-0.0295	-0.0473333	0.113333	-0.00283333												2.71		-0.0235	-0.0218333	0.162	0.0573333	0.02	-0.013	-0.0134783				2.71		0.0493333	-0.0158333	0.21025	0.0856667	-0.011
2.72		-0.0216667	-0.0045	-0.0383333	-0.0325	-0.0455	-0.0301667	-0.00383333			2.72		-0.0395	-0.0244	-0.0206667	0.00383333	-0.0473333	0.0133333	-0.00283333												2.72		-0.0568333	-0.0218333	-0.038	0.0573333	0.0533333	0.0536667	0.03				2.72		-0.0173333	0.0175	0.16025	-0.0476667	0.0223333
2.73		0.0116667	-0.0045	-0.0383333	0.00083333	0.0211667	-0.0301667	-0.00383333			2.73		0.0605	-0.0044	0.046	0.00383333	-0.014	-0.0533333	0.0305												2.73		-0.0568333	0.0115	0.212	0.0906667	0.02	-0.013	-0.0134783				2.73		-0.0506667	-0.0158333	0.06025	0.0523333	0.0223333
2.74		-0.0216667	-0.0045	0.0616667	0.00083333	-0.0455	-0.0301667	-0.00383333			2.74		0.0271667	-0.0044	-0.0206667	0.00383333	-0.0473333	-0.0533333	-0.00283333												2.74		-0.0235	-0.0218333	-0.088	0.0573333	-0.0133333	-0.013	-0.0134783				2.74		-0.0173333	-0.0158333	0.16025	-0.0143333	0.0223333
2.75		0.0116667	-0.0045	0.0283333	-0.0325	-0.0455	-0.0301667	-0.00383333			2.75		-0.0395	-0.0244	0.046	0.0371667	-0.0473333	0.0133333	-0.00283333												2.75		0.0431667	-0.0218333	0.212	0.0573333	0.0533333	0.0203333	-0.0134783				2.75		0.016	-0.0158333	-0.08975	0.0523333	-0.011
2.76		-0.0216667	-0.0045	-0.005	-0.0325	-0.0455	-0.0301667	-0.00383333			2.76		-0.0395	-0.0044	-0.0206667	0.103833	-0.0473333	0.113333	-0.00283333												2.76		-0.0235	0.0448333	0.062	-0.0426667	-0.0133333	0.0203333	-0.0134783				2.76		0.0493333	0.0175	-0.03975	-0.0143333	0.0556667
2.77		0.0116667	-0.0045	-0.0383333	0.0341667	-0.0455	-0.0301667	-0.00383333			2.77		0.0271667	-0.0044	0.046	0.103833	-0.0473333	0.0466667	-0.00283333												2.77		-0.0235	0.0448333	0.012	0.0573333	-0.0133333	-0.013	0.03				2.77		-0.0506667	-0.0158333	0.06025	0.0523333	-0.011
2.78		-0.0216667	-0.0045	-0.0383333	0.0341667	-0.0455	-0.0301667	-0.00383333			2.78		-0.0395	0.0156	0.046	-0.0295	-0.0473333	-0.02	-0.00283333												2.78		-0.0568333	-0.0218333	-0.038	-0.0426667	-0.0133333	0.0203333	-0.0134783				2.78		-0.0173333	0.0175	0.01025	-0.081	-0.011
2.79		-0.0216667	0.0155	-0.0383333	0.00083333	-0.0121667	0.00316667	0.0295			2.79		-0.0395	0.0156	-0.0206667	-0.0295	-0.0473333	-0.02	-0.00283333												2.79		-0.0568333	-0.0218333	-0.038	0.0573333	-0.0133333	0.0203333	-0.0134783				2.79		-0.0506667	0.0508333	-0.08975	0.019	-0.011
2.8		0.0116667	-0.0045	-0.005	-0.0325	0.121167	0.0365	-0.00383333			2.8		-0.00616667	-0.0244	0.046	-0.0295	-0.0473333	-0.0533333	-0.00283333												2.8		-0.0568333	0.0115	0.062	0.024	-0.0133333	-0.013	-0.0134783				2.8		-0.0506667	-0.0158333	0.01025	0.152333	-0.011
2.81		-0.0216667	-0.0045	0.0283333	-0.0325	-0.0121667	0.0698333	0.0295			2.81		0.0271667	0.0156	0.046	-0.0295	-0.0473333	-0.0533333	0.0305												2.81		0.00983333	0.0448333	-0.038	-0.00933333	-0.0133333	0.0203333	-0.0134783				2.81		0.0493333	0.0175	0.11025	-0.081	-0.011
2.82		-0.0216667	-0.0045	-0.005	0.200833	-0.0455	0.00316667	-0.00383333			2.82		-0.00616667	0.0356	-0.0206667	-0.0295	-0.0473333	-0.02	0.0305												2.82		0.0431667	-0.0218333	-0.238	0.124	0.02	-0.013	-0.0134783				2.82		0.016	-0.0158333	0.06025	-0.0143333	0.0223333
2.83		0.045	-0.0045	0.0283333	0.0675	-0.0455	0.103167	-0.00383333			2.83		-0.00616667	0.0156	0.0126667	0.0371667	-0.0473333	-0.0533333	-0.00283333												2.83		0.00983333	0.0781667	0.212	-0.00933333	-0.0133333	0.0203333	0.03				2.83		-0.0506667	-0.0158333	-0.08975	-0.081	-0.011
2.84		-0.0216667	-0.0045	0.0283333	0.134167	-0.0121667	-0.0301667	-0.00383333			2.84		-0.00616667	-0.0044	-0.0206667	0.0705	-0.0473333	-0.0533333	-0.00283333												2.84		0.00983333	-0.0218333	-0.038	0.024	0.0533333	-0.013	-0.0134783				2.84		0.0493333	-0.0158333	0.26025	0.119	-0.011
2.85		-0.0216667	-0.0045	-0.005	0.00083333	0.0545	-0.0301667	0.0295			2.85		0.0271667	-0.0244	0.0126667	0.0371667	0.0526667	-0.0533333	-0.00283333												2.85		-0.0568333	0.0781667	-0.038	-0.00933333	-0.0133333	-0.013	-0.0134783				2.85		-0.0506667	0.0175	-0.13975	-0.0476667	-0.011
2.86		0.0116667	-0.0045	-0.005	0.0675	0.0545	-0.0301667	-0.00383333			2.86		-0.00616667	-0.0044	0.046	0.103833	-0.014	-0.0533333	-0.00283333												2.86		0.00983333	-0.0218333	0.012	-0.00933333	-0.0133333	-0.013	-0.0134783				2.86		0.0493333	-0.0158333	0.06025	0.152333	-0.011
2.87		-0.0216667	-0.0045	-0.0383333	0.00083333	-0.0455	0.0698333	-0.00383333			2.87		-0.0395	-0.0244	-0.0206667	0.0371667	0.0193333	-0.0533333	-0.00283333												2.87		-0.0235	-0.0218333	-0.038	-0.00933333	-0.0133333	-0.013	-0.0134783				2.87		-0.0506667	0.0175	0.01025	-0.0476667	0.0223333
2.88		-0.0216667	0.0155	-0.005	0.0341667	-0.0455	0.00316667	-0.00383333			2.88		-0.00616667	-0.0244	0.0126667	-0.0295	-0.014	-0.0533333	-0.00283333												2.88		-0.0568333	-0.0218333	0.112	0.157333	0.0533333	0.0203333	0.03				2.88		-0.0173333	-0.0158333	0.16025	-0.0476667	-0.011
2.89		-0.0216667	0.0155	0.0283333	-0.0325	0.0878333	0.0698333	-0.00383333			2.89		-0.00616667	0.0156	-0.0206667	-0.0295	-0.0473333	-0.0533333	-0.00283333												2.89		-0.0235	-0.0218333	-0.188	-0.00933333	-0.0133333	-0.013	-0.0134783				2.89		-0.0173333	0.0175	0.06025	-0.0476667	-0.011
2.9		0.0116667	-0.0045	-0.005	-0.0325	-0.0121667	0.0365	-0.00383333			2.9		-0.00616667	-0.0044	-0.0206667	0.00383333	-0.014	0.08	-0.00283333												2.9		0.00983333	-0.0218333	0.062	0.0573333	-0.0133333	-0.013	-0.0134783				2.9		0.016	-0.0158333	0.16025	0.0523333	0.0223333
2.91		0.0116667	-0.0045	-0.0383333	0.0341667	-0.0455	-0.0301667	-0.00383333			2.91		-0.00616667	-0.0244	0.0126667	0.0705	-0.014	0.0133333	-0.00283333												2.91		-0.0235	-0.0218333	0.062	-0.00933333	-0.0133333	0.0203333	0.0734783				2.91		-0.0173333	-0.0158333	-0.23975	-0.0143333	0.0223333
2.92		0.0116667	0.0155	-0.005	0.0341667	-0.0121667	-0.0301667	-0.00383333			2.92		-0.0395	-0.0044	0.046	0.0705	0.0193333	0.0466667	0.0305												2.92		-0.0568333	-0.0218333	-0.188	-0.0426667	0.02	-0.013	-0.0134783				2.92		-0.0173333	-0.0158333	0.06025	-0.0143333	-0.011
2.93		0.0116667	-0.0045	-0.0383333	-0.0325	-0.0121667	-0.0301667	-0.00383333			2.93		-0.00616667	-0.0044	0.0126667	0.0705	-0.0473333	0.113333	-0.00283333												2.93		-0.0235	0.0115	-0.088	-0.00933333	-0.0133333	-0.013	-0.0134783				2.93		-0.0506667	-0.0158333	0.11025	0.119	0.0223333
2.94		-0.0216667	-0.0045	-0.0383333	0.0341667	0.0545	-0.0301667	-0.00383333			2.94		-0.0395	-0.0044	-0.0206667	0.0705	-0.0473333	-0.02	-0.00283333												2.94		-0.0235	0.0448333	0.062	0.0573333	-0.0133333	0.0536667	-0.0134783				2.94		-0.0173333	0.0175	0.06025	-0.081	-0.011
2.95		-0.0216667	-0.0045	0.0283333	0.0341667	-0.0455	-0.0301667	-0.00383333			2.95		0.1605	0.0356	-0.0206667	0.00383333	-0.0473333	0.0133333	-0.00283333												2.95		-0.0235	-0.0218333	-0.088	0.024	0.02	-0.013	0.03				2.95		-0.0173333	-0.0158333	-0.08975	-0.081	-0.011
2.96		-0.0216667	0.0155	0.0283333	-0.0325	-0.0455	-0.0301667	-0.00383333			2.96		0.0271667	-0.0044	-0.0206667	-0.0295	-0.0473333	0.213333	0.0305												2.96		-0.0568333	-0.0218333	0.312	-0.0426667	-0.0133333	0.0203333	0.03				2.96		0.016	-0.0158333	-0.03975	-0.081	-0.011
2.97		-0.0216667	-0.0045	-0.005	0.00083333	-0.0121667	0.00316667	-0.00383333			2.97		0.0271667	-0.0244	-0.0206667	0.0705	-0.0473333	0.18	-0.00283333												2.97		0.00983333	0.0115	0.012	-0.076	0.02	-0.013	-0.0134783				2.97		0.016	-0.0158333	-0.08975	0.019	-0.011
2.98		0.045	-0.0045	0.0283333	-0.0325	-0.0455	0.0365	-0.00383333			2.98		-0.00616667	0.0156	0.046	0.00383333	-0.0473333	-0.0533333	-0.00283333												2.98		-0.0235	-0.0218333	-0.088	-0.00933333	-0.0133333	-0.013	-0.0134783				2.98		-0.0506667	-0.0158333	0.06025	0.019	-0.011
2.99		-0.0216667	0.0155	-0.0383333	0.00083333	-0.0455	0.00316667	-0.00383333			2.99		-0.00616667	-0.0044	0.0126667	-0.0295	-0.0473333	-0.02	-0.00283333												2.99		-0.0235	-0.0218333	0.112	-0.076	-0.0133333	0.0203333	0.0734783				2.99
[truncated: 5 more columns]
