# Supplementary material for: Aversive stimuli drive hypothalamus-to-habenula excitation to promote escape behavior
Source: eLife. 2017 Sep 5;6:e30697. doi: 10.7554/eLife.30697 (PMC5606847; doi:10.7554/eLife.30697)
Supplement: Figure 2—supplement figure 1—source data 1. [file elife-30697-fig3.xlsx]

## Sheet: Figure2-figure supplement1
Panel B
Real time place preference experiments in mice implanted with optic fiber in LHb
	Time in laser-paired compartment, %
Group	AAV-CTRL		AAV-CoChR in mVTA		AAV-CoChR in LH
	50.1396		8.8		6.96667
	42.6222		28.0111		30.8889
	53.8222		21.7778		8.66667
	41.6362		20.2071		15.9228
	57.2347				11.6679
	52.9301				9.47496
	Total distance, m
Group	AAV-CTRL		AAV-CoChR in mVTA		AAV-CoChR in LH
	31.305		11.937		16.896
	26.958		37.291		24.066
	28.255		38.032		27.581
	18.015		34.393		17.851
	22.143				24.205
	22.633				17.634
