# Supplementary material for: Aversive stimuli drive hypothalamus-to-habenula excitation to promote escape behavior
Source: eLife. 2017 Sep 5;6:e30697. doi: 10.7554/eLife.30697 (PMC5606847; doi:10.7554/eLife.30697)
Supplement: Figure 2—supplement figure 2—source data 1. [file elife-30697-fig4.xlsx]

## Sheet: Figure2-figure supplement2
Panel B												Panel C
Single cell example, raw values					Amplitude reduction after CNO, first pulse, normalized							Normalized, Optically-evoked post synaptic currents, train 5 pulses
time, s	Current amplitude, pA				cell n		Current amplitude, normalized								BEFORE CNO								AFTER CNO
0					1		0.572616						Cell n	1	2	3	4	5	6		1	2	3	4	5	6
10	71.9953				2		0.263759					Pulse n
20	64.3514				3		0.854046					1		1	1	1	1	1	1		1	1	1	1	1	1
30	59.4831				4		0.816162					2		0.319938	0.318793	0.0963623	0.548737	0.550489	0.466347		0.786772	0.898593	0.0438108	0.923267	1.09725	0.709038
40	46.4943				5		0.118621					3		0.201868	0.218037	0.0694878	0.337879	0.384772	0.442154		0.633698	0.758959	0.0299026	0.624072	1.20595	0.946834
50	52.1502				6		0.139816					4		0.179505	0.233861	0.0550854	0.19697	0.318675	0.130558		0.506509	0.556676	0.0582406	0.337871	1.42792	0.927984
60	49.5896											5		0.237597	0.239672	0.0515219	0.151515	0.390065	0.0791999		0.494838	0.500929	0.0111266	0.418936	0.91762	0.78202
70	50.883
80	45.5787
90	78.622
100	60.9596
110	64.5984
120	52.3565
130	57.033
140	74.6576								Panel D
150	54.1236
160	55.5711								Firing rate: local infusion of CNO: time-course effect, change from the baseline %
170	58.5734
180	60.7213												DREADDi in mVTA
190	53.8156									cell n	1	2	3	4	5	6	7
200	69.2226								time, min
210	71.8326								1		97.6744	100	105.556	100	91.2281	78.8732	111.392
220	64.0288								2		102.326	100	94.4444	100	108.772	121.127	88.6076
230	66.6853								3 CNO		118.605	90	111.111	100	105.263	91.5493	227.848
240	69.612								4		123.256	110	116.667	90	122.807	92.3944	265.823
250	54.7282								5		100	160	94.4444	40	157.895	118.31	215.19
260	45.2038								6		95.3488	192	94.4444	50	140.351	104.225	227.848
CNO 270	77.4013								7		153.488	260	80.5556	10	133.333	95.7746	122.3
280	42.1637								8		144.186	320	61.1111	40	98.2456	143.662	134.1
290	36.6356
300	40.2454
310	44.1255
320	57.6172												DREADDi in LH
330	62.1861									cell n	1	2	3	4	5	6	7
340	38.4725								time, min
350	58.6693								1		112.5	100	99.0991	100	100	107.407	100
360	27.3815								2		87.5	100	100.901	100	100	92.5926	100
370	29.044								3 CNO		112.5	88.8889	99.6139	133.333	107.692	96.2963	50
380	49.1711								4		137.5	88.8889	99.6139	125	76.9231	103.704	0
390	40.7075								5		100	77.7778	104.505	116.667	76.9231	100	100
400	46.2094								6		87.5	66.6667	102.445	116.667	76.9231	100	200
410	45.0178								7		100	100	100.644	133.333	69.2308	53.7037	100
420	35.9642								8		100	111.111	97.8121	125	53.8462	96.2963	100
430	25.3848
440	46.8111
450	28.4162
460	13.6341
470	14.6862
480	11.6984
490	4.5602
500	16.3516
510	8.16127
520	27.0822
530	7.45791
540	5.8274
550	11.5327
560	26.3062
570	21.3536
580	13.7009
590	13.7852
600	15.189
610	25.472
620	18.6099
630	13.4597
640	17.3253
650	7.54511
660	7.53639
670	3.70861
680	20.7055
690	4.07773
700	20.9961
710	10.7335
720	8.8966
730	7.92294
740	10.0475
750	2.61289
760	3.53713
770	0.412714
780	17.4909
790	7.3591
800	7.10914
810	0.110445
820	5.97563
830	5.87391
840	12.8406
850	19.9701
860	14.7531
870	27.2159
880	8.51876
890	18.546
900	4.15039
910	0.537691
920	12.5907
930	1.78165
940	10.1522
950	21.7721
960	9.43429
970	18.979
980	6.16164
990	8.67862
1000	0.133696
1010	4.45557
1020	2.64776
1030	9.10296
1040	0.837054
1050	10.9049
1060	13.6486
1070	13.9335
1080	13.9335
1090	12
1100	10
1110	5
