# Supplementary material for: Aversive stimuli drive hypothalamus-to-habenula excitation to promote escape behavior
Source: eLife. 2017 Sep 5;6:e30697. doi: 10.7554/eLife.30697 (PMC5606847; doi:10.7554/eLife.30697)
Supplement: Figure 2—supplement figure 3—source data 1. [file elife-30697-fig5.xlsx]

## Sheet: Figure2-figure supplement3
Panel C								Panel D																				Panel E
Opto-idelntified LHb-projecting LH neurons								Normalized PSTHs, Fs excited cells																				Characteristics of the Fs responses
																								Responses to Fs
								mouse n	1	2	3	4	5	6	7	8	9	10	11									cell n		Latency, ms	Duration, ms	Firing rate, shock-baseline, Hz
Firing activity in LH: main parameters								time, bin 10 ms															Fs excited		Fs not responsive
	Firing rate, Hz		Coefficient of variation, %					-2	-0.0241667	0.106667	0.0604167	-0.00878788	-0.0135	0.0203333	-0.0201667	-0.0046	-0.004	-0.001	-0.00516667		n of cells		11		3			1		20	190	27
	17.01		63.2					-1.99	-0.1075	-0.06	-0.0229167	-0.0390909	-0.0135	0.087	0.0465	-0.0046	-0.004	-0.001	-0.00516667									2		20	190	33
	15.1		65.3					-1.98	-0.0241667	0.0233333	0.0604167	-0.00878788	-0.0135	0.0203333	0.0465	-0.0046	0.0293333	-0.001	-0.00516667		percentage		78		22			3		10	190	26.9
	18.7		71.1					-1.97	-0.1075	0.106667	0.14375	0.0215152	0.0531667	0.0203333	-0.0535	-0.0046	-0.004	-0.001	-0.00516667									4		20	120	20.58
	14.4		41.02					-1.96	0.0591667	0.106667	-0.0229167	0.0215152	0.0198333	-0.0463333	0.113167	-0.0046	0.0293333	-0.001	-0.00516667									5		10	50	11.3
	2.8		71.35					-1.95	-0.1075	0.19	0.310417	-0.0390909	-0.0135	-0.013	0.0131667	-0.0046	-0.004	-0.001	-0.00516667									6		10	40	15.4
	5.1		53.98					-1.94	0.0591667	0.19	0.0604167	-0.0390909	-0.0135	0.0203333	0.0465	-0.0046	-0.004	-0.001	-0.00516667									7		10	600	7.2
	15.1		75.37					-1.93	-0.1075	0.19	0.14375	0.0215152	-0.0135	-0.0463333	0.1465	-0.0046	-0.004	-0.001	-0.00516667									8		110	110	2.24
	7.2		63.8					-1.92	0.0591667	0.0233333	0.14375	0.112424	-0.0135	0.0536667	-0.0201667	-0.0046	-0.004	-0.001	-0.00516667									9		100	70	4.8
	8		63.1					-1.91	-0.1075	0.356667	0.0604167	0.0215152	-0.0135	-0.0463333	0.0131667	0.0354	-0.004	-0.001	-0.00516667									10		10	120	10.7
	5.9		205.9					-1.9	-0.0241667	-0.06	0.14375	-0.0390909	0.0198333	0.0203333	0.0131667	-0.0046	-0.004	-0.001	-0.00516667									11		20	120	11.39
	0		95.4					-1.89	-0.0241667	0.19	0.14375	-0.0693939	-0.0135	-0.013	-0.0535	-0.0046	-0.004	-0.001	-0.00516667
	0.4		156.8					-1.88	-0.1075	0.273333	0.14375	0.0215152	0.0198333	0.0203333	-0.0535	-0.0046	-0.004	-0.001	-0.00516667
	0.4		171.6					-1.87	-0.0241667	0.19	0.14375	0.0215152	-0.0135	-0.0463333	-0.0201667	-0.0046	-0.004	-0.001	-0.00516667
	1.4		137.9					-1.86	-0.1075	0.19	0.0604167	-0.0390909	0.0531667	-0.013	0.113167	0.0354	-0.004	-0.001	-0.00516667
								-1.85	-0.0241667	0.106667	0.227083	-0.0390909	-0.0135	-0.013	-0.0201667	-0.0046	-0.004	-0.001	-0.00516667
								-1.84	0.0591667	-0.143333	0.14375	-0.0693939	-0.0135	0.0203333	-0.0201667	-0.0046	0.0626667	-0.001	0.0615
								-1.83	0.1425	-0.06	0.0604167	0.0518182	-0.0135	0.0203333	0.0465	0.0154	-0.004	-0.001	0.0615
								-1.82	0.0591667	-0.06	0.14375	0.142727	0.0531667	-0.0463333	0.0131667	-0.0046	-0.004	-0.001	-0.00516667
								-1.81	0.0591667	-0.143333	0.14375	-0.0390909	0.0198333	-0.0463333	0.0465	0.0154	-0.004	-0.001	-0.00516667
								-1.8	0.0591667	-0.143333	0.227083	-0.00878788	-0.0135	0.0203333	-0.0201667	-0.0046	-0.004	-0.001	-0.00516667
								-1.79	-0.1075	-0.143333	-0.0229167	0.0215152	-0.0135	0.0203333	-0.0535	-0.0046	-0.004	-0.001	0.0281667
								-1.78	0.1425	-0.06	0.14375	0.0518182	0.0198333	-0.0463333	0.0798333	0.0154	-0.004	-0.001	-0.00516667
								-1.77	-0.0241667	-0.06	0.14375	0.0518182	-0.0135	-0.0463333	-0.0201667	-0.0046	-0.004	-0.001	-0.00516667
								-1.76	0.0591667	-0.06	0.14375	-0.099697	0.0198333	0.0203333	0.0131667	0.0154	-0.004	-0.001	-0.00516667
								-1.75	-0.1075	0.19	0.14375	0.0821212	0.0531667	0.0203333	-0.0201667	-0.0046	0.0293333	-0.001	-0.00516667
								-1.74	-0.1075	-0.06	0.0604167	-0.0693939	-0.0135	-0.013	-0.0201667	0.0154	-0.004	-0.001	-0.00516667
								-1.73	-0.0241667	-0.06	-0.0229167	-0.00878788	-0.0135	0.0203333	0.0131667	-0.0046	-0.004	-0.001	-0.00516667
								-1.72	-0.0241667	0.106667	0.310417	-0.099697	-0.0135	-0.013	0.0465	-0.0046	-0.004	-0.001	0.0281667
								-1.71	0.0591667	0.106667	0.0604167	0.0518182	0.0531667	-0.013	-0.0201667	0.0154	-0.004	-0.001	0.0281667
								-1.7	0.0591667	0.273333	0.14375	0.0518182	0.0198333	-0.0463333	-0.0201667	-0.0046	0.0293333	-0.001	-0.00516667
								-1.69	0.1425	0.106667	-0.0229167	-0.0390909	0.0198333	0.0203333	0.0131667	-0.0046	-0.004	-0.001	-0.00516667
								-1.68	-0.0241667	0.273333	-0.10625	-0.0693939	-0.0135	-0.013	0.0798333	0.0154	-0.004	-0.001	-0.00516667
								-1.67	0.225833	0.106667	-0.10625	0.0215152	0.0198333	-0.013	-0.0201667	0.0154	-0.004	-0.001	-0.00516667
								-1.66	0.0591667	-0.143333	0.0604167	0.0518182	-0.0135	0.0536667	-0.0201667	-0.0046	-0.004	-0.001	-0.00516667
								-1.65	-0.1075	0.19	-0.10625	0.0518182	-0.0135	-0.013	0.113167	-0.0046	-0.004	-0.001	-0.00516667
								-1.64	0.0591667	-0.06	-0.0229167	-0.00878788	-0.0135	0.0536667	-0.0201667	0.0154	-0.004	-0.001	-0.00516667
								-1.63	-0.0241667	-0.143333	0.0604167	-0.00878788	0.0198333	0.0203333	0.0131667	-0.0046	-0.004	-0.001	-0.00516667
								-1.62	-0.1075	-0.06	-0.0229167	-0.0693939	0.0198333	-0.0463333	0.0131667	-0.0046	-0.004	-0.001	-0.00516667
								-1.61	-0.0241667	-0.143333	-0.10625	0.0821212	0.0198333	-0.0463333	-0.0535	-0.0046	-0.004	-0.001	-0.00516667
								-1.6	0.0591667	-0.143333	-0.10625	-0.0693939	-0.0135	-0.013	0.0131667	-0.0046	-0.004	-0.001	-0.00516667
								-1.59	0.1425	0.0233333	-0.10625	-0.0390909	-0.0135	-0.0463333	0.0465	0.0554	-0.004	-0.001	-0.00516667
								-1.58	-0.0241667	-0.143333	-0.0229167	-0.00878788	0.0198333	0.0203333	0.1465	-0.0046	-0.004	-0.001	-0.00516667
								-1.57	-0.1075	-0.06	-0.10625	0.0215152	-0.0135	-0.013	-0.0535	-0.0046	-0.004	-0.001	-0.00516667
								-1.56	-0.0241667	-0.06	-0.0229167	0.142727	-0.0135	0.0203333	-0.0201667	-0.0046	-0.004	-0.001	-0.00516667
								-1.55	0.0591667	0.0233333	-0.0229167	-0.099697	-0.0135	-0.013	-0.0201667	-0.0046	-0.004	-0.001	-0.00516667
								-1.54	-0.0241667	0.0233333	0.0604167	0.0215152	-0.0135	0.087	0.0465	-0.0046	-0.004	-0.001	-0.00516667
								-1.53	-0.1075	-0.06	-0.10625	-0.0390909	0.0531667	-0.0463333	0.0465	-0.0046	-0.004	-0.001	-0.00516667
								-1.52	-0.0241667	-0.06	-0.10625	0.0821212	-0.0135	-0.013	-0.0868333	-0.0046	-0.004	-0.001	-0.00516667
								-1.51	-0.0241667	0.0233333	-0.0229167	-0.0693939	-0.0135	-0.0463333	-0.0201667	0.0154	-0.004	-0.001	-0.00516667
								-1.5	-0.1075	-0.143333	-0.0229167	-0.0390909	-0.0135	0.0203333	0.0465	-0.0046	-0.004	-0.001	-0.00516667
								-1.49	0.1425	0.0233333	-0.10625	0.203333	0.0198333	0.0203333	-0.0868333	-0.0046	-0.004	-0.001	0.0281667
								-1.48	0.0591667	-0.06	-0.10625	-0.0693939	-0.0135	0.0536667	-0.0535	-0.0046	-0.004	-0.001	-0.00516667
								-1.47	-0.1075	-0.143333	-0.10625	-0.099697	0.0198333	0.0536667	-0.0201667	-0.0046	-0.004	-0.001	-0.00516667
								-1.46	-0.1075	-0.143333	-0.10625	0.142727	-0.0135	-0.0463333	0.0465	0.0154	-0.004	-0.001	-0.00516667
								-1.45	-0.1075	-0.06	-0.0229167	-0.00878788	-0.0135	-0.013	0.1465	-0.0046	-0.004	-0.001	-0.00516667
								-1.44	0.0591667	0.0233333	-0.10625	-0.00878788	-0.0135	-0.013	-0.0535	-0.0046	-0.004	-0.001	-0.00516667
								-1.43	-0.0241667	0.0233333	-0.10625	0.0215152	-0.0135	0.087	-0.0201667	0.0154	-0.004	-0.001	-0.00516667
								-1.42	-0.0241667	0.0233333	-0.0229167	-0.0390909	-0.0135	-0.013	0.0798333	-0.0046	-0.004	-0.001	-0.00516667
								-1.41	-0.0241667	-0.06	0.0604167	-0.0390909	-0.0135	-0.0463333	-0.0201667	-0.0046	-0.004	-0.001	-0.00516667
								-1.4	-0.0241667	0.19	-0.0229167	-0.0390909	0.0531667	0.087	-0.0201667	-0.0046	-0.004	-0.001	-0.00516667
								-1.39	-0.1075	0.19	-0.10625	0.0215152	0.0198333	0.0203333	-0.0201667	-0.0046	-0.004	-0.001	-0.00516667
								-1.38	0.1425	0.273333	-0.10625	-0.00878788	-0.0135	-0.013	-0.0201667	-0.0046	-0.004	-0.001	-0.00516667
								-1.37	-0.1075	0.106667	-0.0229167	0.0518182	-0.0135	0.0203333	0.0798333	-0.0046	-0.004	-0.001	-0.00516667
								-1.36	-0.0241667	0.0233333	0.14375	0.0215152	0.0198333	0.0203333	-0.0201667	-0.0046	-0.004	-0.001	0.0281667
								-1.35	-0.0241667	-0.06	0.0604167	0.0215152	0.0198333	0.0203333	-0.0201667	0.0154	-0.004	-0.001	-0.00516667
								-1.34	0.0591667	0.106667	-0.10625	-0.0693939	-0.0135	-0.0463333	0.0798333	-0.0046	-0.004	-0.001	0.0281667
								-1.33	-0.0241667	-0.143333	-0.10625	-0.0693939	-0.0135	-0.0463333	-0.0535	-0.0046	-0.004	-0.001	0.0281667
								-1.32	0.225833	-0.06	0.0604167	0.0821212	-0.0135	0.0203333	0.0131667	-0.0046	-0.004	-0.001	0.0615
								-1.31	0.0591667	-0.143333	-0.0229167	-0.00878788	0.0198333	0.0536667	0.0798333	-0.0046	-0.004	-0.001	-0.00516667
								-1.3	0.225833	-0.143333	-0.10625	-0.00878788	-0.0135	-0.013	-0.0201667	-0.0046	-0.004	-0.001	-0.00516667
								-1.29	0.1425	0.0233333	-0.10625	-0.0390909	-0.0135	-0.013	0.0131667	0.0154	0.0293333	-0.001	-0.00516667
								-1.28	0.225833	0.0233333	-0.0229167	0.0215152	0.0198333	-0.0463333	-0.0201667	-0.0046	-0.004	-0.001	-0.00516667
								-1.27	0.0591667	-0.143333	-0.0229167	0.0821212	-0.0135	-0.0463333	-0.0201667	-0.0046	-0.004	-0.001	0.0281667
								-1.26	0.225833	0.0233333	-0.0229167	-0.00878788	-0.0135	0.0536667	-0.0201667	-0.0046	-0.004	-0.001	-0.00516667
								-1.25	0.1425	0.106667	-0.0229167	-0.099697	-0.0135	0.0536667	0.0131667	-0.0046	-0.004	-0.001	-0.00516667
								-1.24	-0.0241667	-0.143333	-0.10625	-0.00878788	0.0198333	-0.013	0.0465	-0.0046	-0.004	-0.001	-0.00516667
								-1.23	-0.1075	0.106667	-0.10625	-0.0390909	-0.0135	-0.0463333	-0.0535	-0.0046	-0.004	-0.001	-0.00516667
								-1.22	-0.0241667	-0.06	-0.10625	0.0518182	-0.0135	-0.013	-0.0535	-0.0046	-0.004	-0.001	-0.00516667
								-1.21	-0.0241667	-0.143333	0.0604167	0.0518182	0.0198333	-0.013	0.0465	-0.0046	-0.004	-0.001	0.0281667
								-1.2	0.0591667	-0.143333	-0.10625	-0.0693939	-0.0135	-0.013	0.0131667	-0.0046	0.0293333	-0.001	-0.00516667
								-1.19	-0.1075	-0.06	-0.0229167	-0.0693939	0.0198333	-0.0463333	0.0465	-0.0046	-0.004	-0.001	-0.00516667
								-1.18	-0.0241667	-0.06	-0.0229167	0.0821212	-0.0135	0.0203333	-0.0201667	-0.0046	0.0293333	-0.001	-0.00516667
								-1.17	-0.0241667	-0.06	-0.10625	0.0518182	0.0198333	0.0536667	-0.0201667	-0.0046	-0.004	-0.001	-0.00516667
								-1.16	-0.1075	-0.143333	-0.0229167	-0.0390909	-0.0135	0.0203333	0.0131667	-0.0046	-0.004	-0.001	-0.00516667
								-1.15	-0.1075	-0.143333	-0.10625	0.0518182	-0.0135	0.0536667	0.0131667	-0.0046	-0.004	-0.001	-0.00516667
								-1.14	-0.0241667	0.106667	-0.10625	-0.0693939	0.0198333	-0.0463333	-0.0201667	-0.0046	-0.004	-0.001	-0.00516667
								-1.13	0.0591667	-0.06	-0.0229167	0.0518182	-0.0135	-0.013	-0.0201667	-0.0046	0.0293333	-0.001	-0.00516667
								-1.12	-0.1075	0.0233333	-0.10625	-0.00878788	-0.0135	0.0203333	0.0798333	-0.0046	-0.004	-0.001	-0.00516667
								-1.11	0.0591667	-0.06	-0.0229167	-0.0390909	-0.0135	-0.013	-0.0535	-0.0046	-0.004	-0.001	0.0281667
								-1.1	0.0591667	-0.06	-0.10625	-0.00878788	-0.0135	0.0203333	0.0465	0.0154	-0.004	-0.001	-0.00516667
								-1.09	0.225833	-0.143333	-0.0229167	0.0215152	-0.0135	-0.013	-0.0201667	-0.0046	-0.004	-0.001	-0.00516667
								-1.08	0.1425	-0.143333	0.0604167	-0.0390909	0.0198333	-0.013	-0.0535	-0.0046	-0.004	-0.001	0.0281667
								-1.07	-0.0241667	-0.143333	0.310417	-0.0390909	0.0531667	-0.013	0.0798333	-0.0046	0.0626667	-0.001	-0.00516667
								-1.06	0.1425	0.0233333	0.227083	0.112424	-0.0135	0.0203333	-0.0201667	-0.0046	0.0293333	-0.001	-0.00516667
								-1.05	0.0591667	-0.06	0.0604167	-0.0390909	-0.0135	-0.0463333	0.0131667	-0.0046	-0.004	-0.001	0.0615
								-1.04	-0.1075	-0.06	0.477083	-0.00878788	-0.0135	-0.013	-0.0868333	0.0154	0.0293333	-0.001	-0.00516667
								-1.03	0.0591667	-0.06	0.310417	0.0518182	0.0198333	0.0203333	0.0131667	-0.0046	-0.004	-0.001	0.0281667
								-1.02	-0.0241667	0.106667	0.64375	0.0821212	0.0198333	-0.013	-0.0201667	-0.0046	-0.004	-0.001	-0.00516667
								-1.01	-0.0241667	-0.06	0.39375	-0.099697	0.0198333	0.0203333	0.0131667	-0.0046	0.0293333	-0.001	-0.00516667
								-1	-0.1075	0.0233333	0.477083	-0.00878788	-0.0135	-0.0463333	-0.0201667	0.0154	-0.004	-0.001	0.0281667
								-0.99	-0.1075	0.0233333	0.310417	0.0518182	0.0198333	0.0203333	0.0798333	-0.0046	-0.004	-0.001	-0.00516667
								-0.98	-0.0241667	0.0233333	0.477083	0.0821212	-0.0135	-0.013	-0.0201667	-0.0046	-0.004	-0.001	-0.00516667
								-0.97	-0.1075	0.19	0.14375	-0.0390909	-0.0135	0.0203333	-0.0201667	-0.0046	-0.004	-0.001	-0.00516667
								-0.96	-0.0241667	0.0233333	0.310417	-0.0693939	0.0198333	-0.0463333	0.0465	0.0154	-0.004	-0.001	-0.00516667
								-0.95	-0.1075	0.0233333	-0.0229167	0.0518182	-0.0135	-0.013	-0.0535	-0.0046	-0.004	-0.001	-0.00516667
								-0.94	0.225833	0.106667	-0.0229167	-0.00878788	0.0198333	0.087	-0.0535	-0.0046	-0.004	-0.001	-0.00516667
								-0.93	-0.0241667	0.106667	-0.10625	0.0215152	0.0198333	0.0203333	-0.0535	-0.0046	-0.004	-0.001	-0.00516667
								-0.92	-0.1075	0.19	-0.10625	0.0215152	-0.0135	-0.0463333	-0.0535	0.0154	-0.004	-0.001	-0.00516667
								-0.91	0.0591667	0.0233333	-0.0229167	0.112424	-0.0135	0.0203333	0.0131667	-0.0046	-0.004	-0.001	-0.00516667
								-0.9	0.1425	0.106667	-0.10625	-0.0693939	-0.0135	-0.0463333	-0.0201667	-0.0046	-0.004	-0.001	0.0281667
								-0.89	0.1425	0.19	-0.0229167	-0.0693939	0.0531667	-0.013	-0.0535	-0.0046	-0.004	-0.001	-0.00516667
								-0.88	-0.0241667	0.19	-0.0229167	-0.0390909	-0.0135	-0.0463333	0.0131667	0.0354	-0.004	-0.001	-0.00516667
								-0.87	0.0591667	-0.06	-0.10625	-0.00878788	-0.0135	0.087	-0.0201667	0.0154	-0.004	-0.001	-0.00516667
								-0.86	0.225833	0.0233333	0.0604167	0.0518182	-0.0135	-0.0463333	0.0131667	-0.0046	-0.004	-0.001	-0.00516667
								-0.85	0.1425	0.0233333	-0.0229167	-0.00878788	0.0198333	-0.013	-0.0535	0.0154	-0.004	-0.001	-0.00516667
								-0.84	0.225833	-0.143333	-0.0229167	-0.0390909	-0.0135	0.087	-0.0535	0.0154	-0.004	-0.001	-0.00516667
								-0.83	-0.0241667	0.106667	-0.0229167	-0.0390909	-0.0135	-0.0463333	0.0131667	-0.0046	-0.004	0.0656667	-0.00516667
								-0.82	0.1425	-0.06	-0.0229167	0.112424	0.0198333	0.0203333	0.0798333	-0.0046	-0.004	-0.001	-0.00516667
								-0.81	-0.1075	-0.143333	-0.0229167	-0.0390909	-0.0135	-0.013	-0.0201667	-0.0046	-0.004	-0.001	-0.00516667
								-0.8	-0.1075	-0.143333	-0.10625	-0.0390909	-0.0135	0.0536667	-0.0868333	-0.0046	-0.004	-0.001	-0.00516667
								-0.79	0.1425	-0.143333	-0.0229167	0.0518182	-0.0135	0.0203333	-0.0201667	-0.0046	-0.004	0.0323333	-0.00516667
								-0.78	0.0591667	-0.06	-0.10625	-0.0693939	-0.0135	0.0203333	0.0465	-0.0046	-0.004	0.0323333	-0.00516667
								-0.77	0.1425	-0.143333	-0.10625	0.0821212	0.0198333	0.0203333	-0.0201667	-0.0046	-0.004	-0.001	-0.00516667
								-0.76	-0.1075	0.0233333	-0.10625	0.0215152	0.0198333	0.0536667	0.0465	-0.0046	-0.004	-0.001	-0.00516667
								-0.75	0.0591667	-0.143333	-0.0229167	0.0518182	0.0198333	-0.013	-0.0535	-0.0046	-0.004	-0.001	0.0615
								-0.74	-0.1075	0.0233333	-0.10625	0.0215152	-0.0135	-0.0463333	-0.0868333	0.0154	-0.004	-0.001	-0.00516667
								-0.73	0.0591667	-0.06	-0.0229167	-0.099697	-0.0135	0.0203333	0.0131667	-0.0046	-0.004	-0.001	0.0281667
								-0.72	-0.0241667	-0.06	-0.10625	-0.00878788	-0.0135	-0.013	0.0798333	-0.0046	-0.004	-0.001	-0.00516667
								-0.71	-0.0241667	0.19	-0.0229167	-0.00878788	-0.0135	-0.0463333	0.0465	-0.0046	-0.004	-0.001	-0.00516667
								-0.7	-0.1075	-0.143333	-0.0229167	0.112424	-0.0135	-0.013	-0.0535	-0.0046	-0.004	-0.001	-0.00516667
								-0.69	-0.1075	-0.143333	-0.10625	-0.00878788	-0.0135	0.0536667	-0.0535	-0.0046	-0.004	-0.001	0.0281667
								-0.68	-0.0241667	-0.06	-0.0229167	-0.0693939	0.0198333	-0.0463333	-0.0535	-0.0046	-0.004	-0.001	-0.00516667
								-0.67	-0.1075	-0.06	-0.10625	0.0215152	0.0198333	0.0203333	-0.0201667	-0.0046	-0.004	-0.001	-0.00516667
								-0.66	-0.0241667	-0.143333	-0.0229167	-0.0390909	-0.0135	0.087	-0.0201667	-0.0046	-0.004	-0.001	-0.00516667
								-0.65	-0.0241667	-0.06	-0.10625	-0.0390909	-0.0135	0.0536667	-0.0535	-0.0046	-0.004	-0.001	0.0281667
								-0.64	-0.0241667	-0.06	-0.10625	-0.00878788	-0.0135	-0.013	0.0131667	0.0154	-0.004	-0.001	-0.00516667
								-0.63	-0.1075	0.0233333	-0.10625	-0.00878788	-0.0135	-0.013	-0.0535	-0.0046	-0.004	-0.001	0.0281667
								-0.62	0.0591667	0.0233333	-0.0229167	0.0518182	-0.0135	0.0203333	-0.0201667	-0.0046	-0.004	-0.001	-0.00516667
								-0.61	0.0591667	0.273333	-0.10625	-0.00878788	-0.0135	0.0536667	0.0131667	-0.0046	-0.004	-0.001	-0.00516667
								-0.6	-0.1075	0.0233333	-0.0229167	0.0215152	-0.0135	-0.013	-0.0535	-0.0046	-0.004	-0.001	-0.00516667
								-0.59	0.0591667	0.106667	-0.10625	-0.00878788	0.0198333	-0.0463333	0.0131667	-0.0046	-0.004	-0.001	-0.00516667
								-0.58	-0.0241667	0.106667	-0.10625	-0.0390909	-0.0135	-0.0463333	0.0465	-0.0046	-0.004	-0.001	-0.00516667
								-0.57	-0.1075	0.0233333	0.0604167	-0.00878788	-0.0135	-0.013	-0.0201667	-0.0046	-0.004	-0.001	-0.00516667
								-0.56	-0.1075	0.19	-0.0229167	-0.0693939	-0.0135	-0.0463333	-0.0201667	-0.0046	-0.004	-0.001	-0.00516667
								-0.55	-0.0241667	0.106667	-0.10625	0.0518182	0.0198333	-0.013	-0.0868333	-0.0046	-0.004	-0.001	-0.00516667
								-0.54	0.0591667	0.106667	-0.10625	-0.00878788	-0.0135	-0.013	-0.0201667	-0.0046	-0.004	-0.001	-0.00516667
								-0.53	-0.0241667	-0.143333	-0.10625	-0.0390909	-0.0135	-0.0463333	-0.0868333	-0.0046	-0.004	-0.001	-0.00516667
								-0.52	-0.0241667	0.106667	-0.0229167	0.0518182	0.0531667	0.0203333	-0.0201667	-0.0046	-0.004	-0.001	-0.00516667
								-0.51	-0.0241667	-0.06	0.0604167	-0.00878788	-0.0135	-0.0463333	-0.0201667	-0.0046	-0.004	-0.001	-0.00516667
								-0.5	-0.1075	0.0233333	-0.0229167	0.0518182	-0.0135	-0.0463333	-0.0201667	-0.0046	-0.004	-0.001	-0.00516667
								-0.49	0.0591667	0.106667	-0.10625	0.0518182	-0.0135	-0.013	0.0131667	-0.0046	-0.004	-0.001	-0.00516667
								-0.48	-0.0241667	-0.06	-0.0229167	-0.099697	0.0198333	-0.013	-0.0535	-0.0046	-0.004	-0.001	-0.00516667
								-0.47	0.1425	0.0233333	-0.10625	0.0518182	-0.0135	0.0203333	-0.0201667	-0.0046	-0.004	-0.001	-0.00516667
								-0.46	-0.0241667	0.0233333	-0.10625	-0.00878788	0.0198333	-0.013	-0.0201667	-0.0046	-0.004	-0.001	-0.00516667
								-0.45	0.0591667	-0.06	-0.10625	0.112424	0.0198333	0.0203333	-0.0201667	-0.0046	0.0293333	-0.001	-0.00516667
								-0.44	0.0591667	-0.06	-0.10625	-0.0390909	-0.0135	-0.013	0.0131667	-0.0046	-0.004	-0.001	-0.00516667
								-0.43	-0.0241667	0.0233333	-0.0229167	0.0821212	-0.0135	0.0536667	0.0798333	-0.0046	-0.004	-0.001	-0.00516667
								-0.42	-0.0241667	-0.143333	-0.0229167	-0.00878788	0.0198333	-0.013	-0.0201667	0.0154	-0.004	-0.001	-0.00516667
								-0.41	0.0591667	0.0233333	-0.0229167	0.0518182	0.0198333	-0.0463333	-0.0201667	-0.0046	-0.004	-0.001	-0.00516667
								-0.4	-0.0241667	-0.06	-0.10625	-0.00878788	-0.0135	0.0203333	0.0131667	0.0154	-0.004	-0.001	-0.00516667
								-0.39	0.0591667	-0.143333	-0.0229167	-0.0693939	-0.0135	-0.013	0.0465	-0.0046	-0.004	-0.001	-0.00516667
								-0.38	-0.0241667	-0.06	-0.0229167	0.0215152	-0.0135	0.0203333	0.0798333	0.0154	-0.004	-0.001	-0.00516667
								-0.37	0.0591667	0.106667	-0.10625	-0.00878788	-0.0135	-0.013	0.0798333	-0.0046	-0.004	-0.001	-0.00516667
								-0.36	-0.0241667	-0.143333	-0.10625	-0.00878788	-0.0135	-0.013	-0.0535	-0.0046	-0.004	-0.001	-0.00516667
								-0.35	-0.0241667	-0.143333	-0.0229167	-0.0390909	-0.0135	0.0203333	-0.0535	-0.0046	-0.004	-0.001	-0.00516667
								-0.34	-0.0241667	0.0233333	-0.0229167	-0.00878788	-0.0135	-0.013	0.0131667	0.0154	-0.004	-0.001	0.0281667
								-0.33	0.0591667	0.106667	-0.10625	-0.00878788	-0.0135	0.0203333	0.0131667	-0.0046	-0.004	-0.001	-0.00516667
								-0.32	0.0591667	-0.06	0.14375	0.0215152	0.0531667	-0.013	-0.0201667	0.0154	0.0293333	-0.001	-0.00516667
								-0.31	-0.0241667	0.106667	-0.10625	0.0518182	-0.0135	0.0203333	0.0131667	-0.0046	0.0293333	-0.001	-0.00516667
								-0.3	-0.1075	-0.143333	-0.0229167	-0.0693939	-0.0135	0.0536667	0.0798333	-0.0046	-0.004	-0.001	-0.00516667
								-0.29	-0.1075	-0.06	-0.10625	0.0215152	-0.0135	-0.013	0.0465	-0.0046	-0.004	-0.001	-0.00516667
								-0.28	-0.0241667	0.0233333	-0.0229167	0.0215152	-0.0135	-0.0463333	0.0131667	-0.0046	0.0293333	-0.001	-0.00516667
								-0.27	-0.0241667	-0.143333	-0.10625	-0.00878788	0.0198333	-0.013	-0.0868333	0.0154	-0.004	-0.001	-0.00516667
								-0.26	-0.0241667	-0.06	0.0604167	-0.00878788	0.0198333	0.120333	0.113167	-0.0046	-0.004	-0.001	-0.00516667
								-0.25	-0.0241667	0.106667	-0.0229167	-0.0693939	-0.0135	-0.013	0.0465	-0.0046	-0.004	-0.001	-0.00516667
								-0.24	-0.1075	-0.143333	-0.0229167	0.0215152	0.0198333	-0.0463333	0.0798333	-0.0046	-0.004	-0.001	-0.00516667
								-0.23	0.0591667	0.0233333	0.14375	-0.099697	0.0198333	-0.013	-0.0201667	-0.0046	-0.004	-0.001	-0.00516667
								-0.22	-0.1075	-0.06	-0.10625	-0.00878788	0.0198333	-0.0463333	0.0131667	-0.0046	-0.004	-0.001	-0.00516667
								-0.21	0.0591667	-0.143333	0.0604167	0.0518182	-0.0135	0.0203333	0.0131667	-0.0046	-0.004	-0.001	-0.00516667
								-0.2	0.0591667	-0.143333	-0.0229167	0.0518182	-0.0135	0.0536667	0.0465	-0.0046	0.0293333	0.0323333	-0.00516667
								-0.19	-0.1075	-0.06	-0.10625	-0.0390909	0.0198333	0.0536667	-0.0201667	0.0154	0.0293333	0.0323333	-0.00516667
								-0.18	-0.0241667	-0.06	-0.0229167	0.0518182	-0.0135	-0.013	0.0131667	-0.0046	-0.004	-0.001	-0.00516667
								-0.17	-0.1075	-0.143333	-0.0229167	-0.099697	-0.0135	-0.013	0.0131667	-0.0046	-0.004	-0.001	-0.00516667
								-0.16	-0.1075	0.273333	0.0604167	-0.00878788	-0.0135	-0.013	0.0131667	-0.0046	-0.004	-0.001	-0.00516667
								-0.15	-0.0241667	-0.06	-0.10625	0.0215152	0.0198333	-0.0463333	0.0465	0.0354	-0.004	-0.001	-0.00516667
								-0.14	-0.1075	0.0233333	-0.10625	-0.099697	-0.0135	-0.013	-0.0868333	-0.0046	-0.004	-0.001	-0.00516667
								-0.13	-0.0241667	0.0233333	-0.10625	0.0518182	0.0198333	-0.013	-0.0201667	-0.0046	-0.004	-0.001	-0.00516667
								-0.12	0.0591667	0.0233333	0.0604167	0.0821212	0.0198333	-0.013	0.0465	-0.0046	-0.004	-0.001	-0.00516667
								-0.11	-0.0241667	0.106667	-0.10625	-0.0390909	-0.0135	-0.013	-0.0535	-0.0046	-0.004	-0.001	-0.00516667
								-0.1	-0.0241667	-0.06	-0.0229167	-0.099697	-0.0135	0.0536667	-0.0201667	0.0154	-0.004	-0.001	-0.00516667
								-0.09	-0.1075	0.0233333	-0.0229167	0.0518182	0.0198333	0.0203333	-0.0201667	-0.0046	-0.004	-0.001	-0.00516667
								-0.08	-0.0241667	0.19	-0.0229167	0.0215152	-0.0135	0.0203333	0.0131667	-0.0046	0.0293333	-0.001	-0.00516667
								-0.07	0.1425	0.0233333	-0.10625	-0.00878788	0.0198333	0.0203333	0.0131667	0.0154	-0.004	-0.001	-0.00516667
								-0.06	-0.0241667	0.106667	-0.0229167	-0.0390909	-0.0135	-0.013	-0.0868333	-0.0046	-0.004	-0.001	-0.00516667
								-0.05	0.0591667	0.106667	-0.0229167	-0.00878788	-0.0135	0.0203333	0.0131667	0.0154	0.0293333	-0.001	-0.00516667
								-0.04	-0.0241667	0.0233333	-0.10625	-0.00878788	0.0198333	-0.0463333	-0.0535	-0.0046	0.0293333	-0.001	-0.00516667
								-0.03	-0.0241667	0.0233333	-0.0229167	-0.0390909	-0.0135	0.0536667	-0.0535	0.0154	-0.004	-0.001	-0.00516667
								-0.02	-0.0241667	0.0233333	0.0604167	-0.00878788	-0.0135	-0.0463333	-0.0201667	-0.0046	-0.004	-0.001	0.0281667
								-0.01	-0.0241667	-0.06	-0.10625	0.0821212	-0.0135	-0.013	0.0131667	-0.0046	-0.004	-0.001	0.0281667
								0	0.0591667	-0.143333	-0.0229167	-0.00878788	0.0198333	-0.0463333	-0.0535	-0.0046	-0.004	-0.001	-0.00516667
								0.01	-0.0241667	0.0233333	0.14375	-0.00878788	0.0198333	0.0203333	0.2465	-0.0046	-0.004	-0.001	-0.00516667
								0.02	0.0591667	-0.06		-0.099697	0.219833	0.420333	0.0798333	-0.0046	-0.004	-0.001	-0.00516667
								0.03				0.809394	0.0865	0.087	0.0131667	-0.0046	-0.004	0.299	0.0948333
								0.04				0.263939	0.119833	0.0536667	0.213167	-0.0046	-0.004	0.532333	0.0615
								0.05				0.112424	0.0531667	0.0536667	0.0465	-0.0046	-0.004	0.132333	-0.00516667
								0.06				-0.00878788	0.0865	0.0203333	0.0465	0.0154	-0.004	0.099	-0.00516667
								0.07				0.354849	0.0198333	0.0203333	0.179833	-0.0046	0.0293333	0.0323333	0.0281667
								0.08				0.17303	0.0198333	0.087	0.0465	-0.0046	-0.004	0.0323333	0.0948333
								0.09				0.142727	0.0198333	0.0203333	-0.0535	0.0154	-0.004	0.0323333	0.0615
								0.1				0.142727	-0.0135	0.087	0.0131667	-0.0046	-0.004	-0.001	0.0948333
								0.11				0.17303	0.0531667	0.0536667	0.0131667	-0.0046	0.0293333	0.0656667	0.2615
								0.12	0.309167			0.0518182	-0.0135	0.0536667	-0.0201667	0.0354	0.0293333	-0.001	0.394833
								0.13	0.1425			0.0821212	-0.0135	0.0536667	-0.0201667	0.0554	0.0293333	0.0323333	0.128167
								0.14	0.0591667		0.227083	0.17303	0.0531667	0.0536667	0.0798333	0.0554	0.0293333	0.0323333	0.1615
								0.15	-0.1075		0.14375	0.0215152	-0.0135	0.0203333	0.0465	0.0354	0.096	-0.001	-0.00516667
								0.16	0.225833		0.310417	-0.00878788	-0.0135	-0.013	0.113167	0.0354	0.096	-0.001	-0.00516667
								0.17	0.1425		0.14375	-0.0390909	0.0198333	-0.013	0.0131667	-0.0046	0.0293333	-0.001	0.0615
								0.18	0.309167		0.310417	0.112424	-0.0135	0.0203333	0.0798333	-0.0046	-0.004	-0.001	-0.00516667
								0.19	0.225833		0.310417	-0.00878788	-0.0135	-0.013	0.0798333	0.0154	-0.004	-0.001	0.0281667
								0.2	0.475833	0.273333	0.310417	-0.0390909	0.0198333	0.0203333	0.0465	-0.0046	-0.004	-0.001	0.128167
								0.21	0.309167	0.44	0.477083	0.112424	0.0531667	-0.0463333	-0.0201667	0.0154	-0.004	-0.001	0.0615
								0.22	0.309167	0.19	0.477083	0.0215152	0.0531667	-0.013	0.0465	0.0354	-0.004	-0.001	0.0615
								0.23	0.559167	0.106667	0.39375	-0.00878788	-0.0135	-0.013	0.0798333	0.0154	-0.004	-0.001	0.0281667
								0.24	0.475833	0.44	0.227083	-0.00878788	-0.0135	-0.013	0.0798333	0.0554	-0.004	-0.001	0.1615
								0.25	0.6425	0.523333	0.310417	-0.0390909	-0.0135	0.0203333	0.0798333	0.0154	-0.004	-0.001	0.0281667
								0.26	0.1425	0.69	0.39375	-0.0390909	-0.0135	-0.013	0.0465	0.0154	-0.004	-0.001	-0.00516667
								0.27	0.309167	0.69	0.39375	0.0518182	0.0198333	0.087	0.213167	0.0354	-0.004	-0.001	0.0281667
								0.28	0.1425	0.356667	0.14375	-0.0390909	0.0198333	-0.0463333	0.0131667	0.0154	-0.004	-0.001	0.0281667
								0.29	0.309167	0.273333	0.310417	-0.099697	0.0198333	0.0536667	-0.0201667	0.0154	-0.004	-0.001	0.0615
								0.3	0.1425	0.19	0.0604167	-0.0693939	0.0198333	-0.013	0.213167	-0.0046	-0.004	-0.001	0.0615
								0.31	0.0591667	0.44	0.227083	0.0215152	-0.0135	0.0203333	0.1465	-0.0046	0.096	-0.001	0.0615
								0.32	-0.0241667	0.44	0.0604167	-0.0390909	0.0198333	-0.013	0.0798333	0.0154	0.0293333	-0.001	0.0281667
								0.33	-0.0241667	0.19	0.0604167	-0.00878788	0.0198333	-0.013	0.1465	0.0154	-0.004	-0.001	0.0281667
								0.34	-0.1075	0.0233333	-0.10625	0.0215152	-0.0135	0.0203333	0.1465	0.0154	-0.004	-0.001	-0.00516667
								0.35	0.1425	0.44	-0.10625	0.0518182	0.0531667	-0.013	0.1465	0.0154	-0.004	-0.001	-0.00516667
								0.36	-0.1075	0.19	-0.10625	0.0215152	0.0198333	0.0203333	0.0465	0.0154	-0.004	-0.001	-0.00516667
								0.37	0.1425	0.19	-0.10625	0.0821212	-0.0135	-0.0463333	0.0465	0.0154	-0.004	-0.001	-0.00516667
								0.38	-0.1075	0.19	-0.0229167	-0.0390909	-0.0135	-0.0463333	0.1465	0.0154	0.0293333	-0.001	0.0615
								0.39	0.1425	0.0233333	0.0604167	-0.0693939	0.0531667	0.0203333	0.0131667	-0.0046	-0.004	0.0323333	-0.00516667
								0.4	-0.1075	-0.06	-0.10625	-0.0390909	-0.0135	-0.0463333	0.1465	0.0154	-0.004	-0.001	-0.00516667
								0.41	0.0591667	-0.143333	-0.0229167	0.0518182	0.0198333	0.0536667	0.0131667	0.0554	-0.004	-0.001	-0.00516667
								0.42	-0.0241667	0.106667	-0.10625	0.0215152	0.0198333	-0.013	-0.0201667	0.0554	-0.004	-0.001	-0.00516667
								0.43	-0.0241667	-0.143333	0.0604167	-0.0693939	0.0198333	-0.0463333	0.213167	0.0154	0.0293333	-0.001	-0.00516667
								0.44	-0.0241667	-0.143333	-0.0229167	-0.00878788	0.0198333	0.0203333	0.113167	0.0154	-0.004	-0.001	-0.00516667
								0.45	-0.1075	0.0233333	-0.0229167	0.0215152	-0.0135	-0.013	0.0465	0.0354	0.0293333	-0.001	-0.00516667
								0.46	0.1425	0.19	0.0604167	0.0215152	0.0531667	0.0536667	0.0131667	0.0354	-0.004	-0.001	-0.00516667
								0.47	-0.1075	-0.143333	-0.10625	-0.00878788	-0.0135	-0.013	0.0131667	0.0154	-0.004	-0.001	0.0281667
								0.48	-0.0241667	0.0233333	0.0604167	0.0215152	-0.0135	-0.0463333	0.0465	-0.0046	-0.004	0.0323333	-0.00516667
								0.49	0.0591667	-0.06	0.0604167	0.0215152	0.0198333	-0.013	0.0798333	0.0154	0.0626667	-0.001	0.0281667
								0.5	0.309167	0.106667	-0.0229167	-0.0693939	-0.0135	0.0203333	0.1465	-0.0046	0.0293333	-0.001	0.0948333
								0.51	0.1425	-0.06	0.0604167	-0.0390909	0.0198333	-0.013	0.0798333	0.0154	0.096	-0.001	-0.00516667
								0.52	-0.0241667	-0.143333	0.0604167	-0.099697	0.0198333	-0.0463333	0.0131667	-0.0046	-0.004	-0.001	0.0281667
								0.53	0.1425	0.44	0.310417	0.839697	-0.0135	0.0536667	-0.0201667	0.0554	0.0293333	-0.001	0.0948333
								0.54	-0.0241667	0.106667	0.0604167	0.294242	0.0198333	-0.013	0.113167	-0.0046	0.0293333	-0.001	0.0281667
								0.55	-0.0241667	-0.143333	0.14375	0.0215152	-0.0135	-0.0463333	0.0798333	0.0354	-0.004	-0.001	-0.00516667
								0.56	-0.0241667	0.0233333	0.0604167	0.0518182	0.0198333	-0.013	-0.0201667	0.0154	0.0626667	-0.001	0.0615
								0.57	0.0591667	0.19	0.477083	0.0215152	-0.0135	-0.013	0.0798333	0.0354	0.0626667	-0.001	0.0281667
								0.58	-0.1075	0.0233333	0.14375	0.112424	0.0531667	0.0203333	0.113167	0.0154	0.0293333	-0.001	-0.00516667
								0.59	-0.0241667	-0.06	0.14375	0.203333	0.0198333	0.087	0.0798333	0.0154	0.0626667	-0.001	0.0615
								0.6	-0.0241667	-0.143333	0.0604167	0.112424	-0.0135	0.0203333	0.0131667	0.0354	0.0293333	-0.001	-0.00516667
								0.61	0.0591667	0.0233333	-0.0229167	0.0215152	-0.0135	0.0536667	0.0465	0.0354	0.0293333	-0.001	0.0281667
								0.62	-0.0241667	-0.143333	-0.0229167	-0.0693939	-0.0135	-0.0463333	0.0465	-0.0046	0.0293333	-0.001	-0.00516667
								0.63	-0.1075	0.0233333	0.477083	0.0821212	0.0198333	0.087	0.0465	-0.0046	0.0626667	-0.001	0.0615
								0.64	0.0591667	-0.143333	0.14375	0.0821212	-0.0135	-0.0463333	0.0465	0.0754	-0.004	-0.001	-0.00516667
								0.65	-0.0241667	-0.06	0.14375	0.0215152	-0.0135	-0.013	-0.0201667	0.0354	0.0293333	-0.001	0.0281667
								0.66	-0.0241667	0.106667	-0.10625	-0.0390909	0.0865	-0.013	0.0465	0.0154	0.0626667	-0.001	0.0615
								0.67	0.3925	0.106667	-0.0229167	-0.0693939	0.0198333	0.0203333	0.0131667	0.0154	-0.004	-0.001	-0.00516667
								0.68	0.0591667	0.19	-0.10625	0.17303	-0.0135	-0.013	-0.0535	0.0354	-0.004	-0.001	0.0281667
								0.69	0.0591667	-0.06	0.0604167	0.0215152	-0.0135	-0.013	0.0465	-0.0046	0.0293333	-0.001	-0.00516667
								0.7	0.0591667	0.0233333	-0.0229167	-0.00878788	0.0531667	-0.0463333	0.0131667	0.0554	0.096	-0.001	-0.00516667
								0.71	-0.1075	0.106667	-0.10625	0.0518182	0.0531667	-0.013	0.113167	0.0354	0.0626667	-0.001	-0.00516667
								0.72	0.225833	0.106667	0.14375	0.0518182	-0.0135	0.0203333	0.0131667	0.0754	0.096	-0.001	-0.00516667
								0.73	-0.0241667	0.0233333	-0.10625	-0.0390909	0.0198333	-0.0463333	0.0465	-0.0046	0.0293333	-0.001	0.0281667
								0.74	0.1425	-0.06	-0.0229167	0.0215152	0.0198333	-0.013	0.0131667	0.0154	-0.004	-0.001	0.0615
								0.75	-0.1075	-0.06	-0.10625	0.0518182	0.0198333	0.0203333	0.0131667	0.0354	-0.004	-0.001	-0.00516667
								0.76	-0.0241667	-0.06	-0.10625	0.0215152	-0.0135	0.0536667	0.0131667	0.0554	-0.004	-0.001	0.0615
								0.77	0.0591667	0.0233333	-0.0229167	0.0215152	0.0198333	0.0203333	0.0798333	0.0154	0.0626667	-0.001	0.0281667
								0.78	-0.0241667	-0.06	-0.0229167	-0.0390909	-0.0135	-0.0463333	0.213167	0.0354	-0.004	-0.001	0.0281667
								0.79	-0.1075	-0.06	-0.0229167	0.0821212	0.0198333	-0.013	-0.0535	-0.0046	-0.004	-0.001	0.0281667
								0.8	-0.1075	-0.143333	-0.10625	0.0215152	-0.0135	0.0203333	-0.0201667	-0.0046	0.0626667	-0.001	0.0281667
								0.81	-0.1075	-0.143333	-0.0229167	-0.0390909	-0.0135	0.0203333	0.0798333	0.0354	0.0293333	-0.001	0.0615
								0.82	-0.1075	-0.143333	-0.0229167	-0.099697	-0.0135	-0.0463333	0.113167	0.0154	0.0293333	-0.001	-0.00516667
								0.83	0.1425	-0.06	-0.0229167	0.0821212	-0.0135	0.0203333	0.0465	0.0154	0.0626667	-0.001	-0.00516667
								0.84	0.1425	-0.06	-0.10625	-0.0390909	-0.0135	0.087	-0.0201667	-0.0046	0.0293333	-0.001	-0.00516667
								0.85	0.0591667	-0.143333	-0.10625	0.0215152	0.0198333	-0.013	0.1465	-0.0046	0.0293333	0.0323333	0.0281667
								0.86	-0.0241667	-0.06	-0.0229167	-0.00878788	0.0198333	0.0203333	-0.0201667	0.0554	0.0293333	0.0323333	-0.00516667
								0.87	-0.0241667	-0.06	-0.10625	-0.0390909	-0.0135	-0.0463333	0.0131667	-0.0046	0.0293333	-0.001	-0.00516667
								0.88	-0.0241667	0.0233333	0.0604167	0.0821212	-0.0135	-0.0463333	0.0798333	0.0154	0.0293333	-0.001	0.0281667
								0.89	-0.0241667	-0.06	-0.0229167	-0.00878788	-0.0135	-0.0463333	0.0798333	0.0954	0.0293333	-0.001	0.0281667
								0.9	-0.1075	-0.06	0.14375	0.0821212	-0.0135	-0.0463333	0.0465	0.0154	0.0293333	-0.001	0.0281667
								0.91	0.0591667	0.0233333	-0.10625	-0.0390909	-0.0135	-0.013	0.0465	0.0154	0.0626667	-0.001	0.0281667
								0.92	-0.0241667	0.106667	-0.10625	-0.13	-0.0135	-0.0463333	0.0131667	0.0154	0.096	-0.001	-0.00516667
								0.93	-0.0241667	-0.06	-0.10625	-0.00878788	0.0198333	-0.0463333	-0.0535	0.0154	-0.004	-0.001	-0.00516667
								0.94	0.0591667	-0.143333	0.0604167	0.0518182	0.0198333	0.0536667	0.0465	0.0154	0.0293333	-0.001	-0.00516667
								0.95	0.1425	0.106667	-0.10625	0.0215152	0.0531667	0.0203333	0.179833	0.0354	0.0293333	-0.001	-0.00516667
								0.96	-0.1075	0.0233333	-0.10625	0.0821212	-0.0135	-0.0463333	-0.0201667	0.0554	-0.004	-0.001	-0.00516667
								0.97	0.0591667	-0.06	-0.10625	0.0518182	-0.0135	-0.0463333	0.0131667	-0.0046	0.0626667	-0.001	-0.00516667
								0.98	-0.0241667	0.0233333	0.14375	-0.00878788	0.0198333	0.120333	0.0131667	-0.0046	0.0293333	-0.001	-0.00516667
								0.99	-0.0241667	-0.143333	0.0604167	-0.099697	-0.0135	0.120333	0.0465	0.0554	0.162667	-0.001	-0.00516667
								1	-0.1075	-0.06	-0.0229167	-0.00878788	0.0198333	-0.0463333	0.0465	0.0354	0.0293333	-0.001	0.0281667
								1.01	0.0591667	0.0233333	-0.10625	-0.0693939	0.0198333	0.0203333	0.0798333	0.0354	0.096	-0.001	-0.00516667
								1.02	-0.1075	-0.06	-0.10625	0.0215152	-0.0135	-0.013	-0.0201667	0.0354	-0.004	-0.001	-0.00516667
								1.03	-0.0241667	-0.143333	-0.10625	-0.0390909	0.0198333	0.0203333	0.0465	0.0154	0.0626667	-0.001	-0.00516667
								1.04	-0.0241667	-0.06	-0.10625	-0.00878788	0.0198333	0.0536667	-0.0201667	-0.0046	0.0293333	-0.001	-0.00516667
								1.05	-0.0241667	-0.06	-0.10625	0.0215152	-0.0135	0.0203333	0.0798333	0.0354	0.0293333	-0.001	-0.00516667
								1.06	-0.1075	-0.143333	-0.10625	-0.0390909	0.0198333	-0.013	0.0465	0.0354	0.0293333	-0.001	-0.00516667
								1.07	-0.0241667	-0.06	-0.0229167	-0.0693939	-0.0135	-0.013	0.0465	0.0954	0.0626667	-0.001	-0.00516667
								1.08	-0.1075	-0.143333	-0.0229167	-0.0390909	-0.0135	0.0203333	0.0465	0.0154	0.0626667	-0.001	0.0281667
								1.09	0.0591667	-0.06	-0.0229167	0.0518182	-0.0135	-0.013	0.0465	0.0354	0.0293333	-0.001	0.0281667
								1.1	0.0591667	-0.06	-0.10625	0.0518182	0.0531667	0.0203333	0.0465	0.0154	0.0626667	-0.001	-0.00516667
								1.11	-0.0241667	-0.143333	-0.10625	-0.099697	-0.0135	0.0203333	-0.0201667	0.0154	0.0626667	-0.001	-0.00516667
								1.12	0.0591667	-0.06	-0.0229167	-0.0390909	0.0531667	-0.013	0.0465	0.0154	0.0293333	-0.001	-0.00516667
								1.13	-0.1075	0.0233333	-0.0229167	-0.00878788	-0.0135	-0.0463333	-0.0535	0.0554	0.0293333	-0.001	-0.00516667
								1.14	-0.0241667	0.0233333	-0.0229167	0.0215152	-0.0135	0.0203333	0.1465	0.0354	0.0293333	-0.001	-0.00516667
								1.15	-0.1075	-0.143333	0.0604167	-0.099697	0.0531667	-0.013	-0.0535	0.0354	0.096	-0.001	0.0281667
								1.16	0.0591667	-0.06	-0.0229167	-0.00878788	-0.0135	-0.013	0.0131667	0.0354	0.0626667	-0.001	-0.00516667
								1.17	-0.0241667	0.0233333	0.0604167	0.0215152	0.0198333	-0.013	0.0131667	0.0554	0.0293333	-0.001	-0.00516667
								1.18	0.1425	0.0233333	-0.10625	-0.00878788	-0.0135	-0.0463333	0.213167	0.0354	0.0293333	-0.001	-0.00516667
								1.19	0.0591667	-0.06	-0.10625	-0.00878788	-0.0135	-0.013	-0.0201667	0.0554	-0.004	-0.001	0.0281667
								1.2	-0.1075	-0.06	-0.10625	-0.00878788	-0.0135	0.0203333	0.0131667	0.0154	0.0293333	-0.001	-0.00516667
								1.21	-0.0241667	-0.06	-0.0229167	0.0215152	0.0198333	0.087	0.0798333	0.0554	-0.004	-0.001	-0.00516667
								1.22	0.1425	-0.143333	-0.0229167	0.0215152	-0.0135	-0.013	0.113167	0.0154	0.0626667	-0.001	-0.00516667
								1.23	0.0591667	-0.06	0.0604167	-0.099697	-0.0135	-0.0463333	-0.0201667	0.0554	0.0626667	-0.001	-0.00516667
								1.24	-0.0241667	-0.06	-0.10625	-0.0390909	-0.0135	-0.013	-0.0535	0.0554	-0.004	-0.001	0.0281667
								1.25	-0.1075	0.0233333	0.0604167	-0.0390909	-0.0135	-0.013	0.0465	0.0554	0.0626667	-0.001	-0.00516667
								1.26	-0.0241667	-0.143333	-0.10625	0.0518182	0.0198333	-0.013	0.0798333	0.0154	0.0293333	-0.001	-0.00516667
								1.27	-0.0241667	0.0233333	-0.10625	-0.0390909	0.0198333	0.0536667	0.113167	0.0354	0.0293333	-0.001	-0.00516667
								1.28	0.225833	-0.06	0.0604167	-0.00878788	0.0198333	0.0203333	-0.0535	0.0354	0.096	-0.001	-0.00516667
								1.29	0.0591667	-0.143333	-0.0229167	-0.0390909	0.0198333	-0.0463333	-0.0201667	0.0354	0.0293333	-0.001	-0.00516667
								1.3	-0.1075	-0.06	-0.0229167	-0.00878788	0.0198333	-0.0463333	0.0465	-0.0046	-0.004	-0.001	-0.00516667
								1.31	-0.1075	0.0233333	-0.10625	-0.0390909	0.0198333	-0.013	0.0798333	0.0154	0.0293333	-0.001	-0.00516667
								1.32	0.1425	-0.06	-0.10625	-0.00878788	-0.0135	0.0203333	0.0131667	0.0554	-0.004	-0.001	-0.00516667
								1.33	-0.1075	-0.06	-0.0229167	-0.00878788	-0.0135	0.0536667	0.113167	0.0154	0.096	-0.001	-0.00516667
								1.34	-0.0241667	-0.06	-0.10625	0.0215152	0.0198333	0.0203333	0.0131667	0.0154	0.0293333	-0.001	-0.00516667
								1.35	0.0591667	-0.06	-0.10625	-0.099697	-0.0135	0.0203333	0.0798333	0.0154	0.0293333	-0.001	-0.00516667
								1.36	-0.0241667	0.0233333	-0.10625	0.0215152	0.0198333	0.0203333	-0.0535	0.0154	-0.004	-0.001	-0.00516667
								1.37	-0.0241667	-0.06	-0.0229167	0.0518182	-0.0135	-0.013	-0.0201667	0.0354	-0.004	-0.001	-0.00516667
								1.38	-0.1075	-0.06	-0.10625	-0.00878788	0.0531667	0.0203333	0.0131667	0.0154	-0.004	-0.001	-0.00516667
								1.39	-0.0241667	-0.143333	-0.0229167	-0.00878788	0.0198333	0.087	0.113167	0.0754	0.0626667	-0.001	-0.00516667
								1.4	0.225833	-0.143333	-0.10625	-0.00878788	-0.0135	-0.013	-0.0201667	-0.0046	-0.004	-0.001	-0.00516667
								1.41	-0.1075	-0.06	-0.10625	-0.099697	0.0198333	-0.0463333	0.0131667	0.0154	0.0293333	-0.001	-0.00516667
								1.42	-0.1075	-0.06	0.14375	-0.0390909	-0.0135	-0.0463333	0.0465	0.0154	0.0293333	-0.001	-0.00516667
								1.43	0.225833	-0.06	-0.10625	0.0215152	-0.0135	0.0203333	0.113167	0.0154	-0.004	-0.001	-0.00516667
								1.44	-0.1075	-0.06	0.14375	0.0215152	-0.0135	-0.0463333	0.0465	0.0154	0.096	-0.001	-0.00516667
								1.45	-0.0241667	-0.143333	-0.10625	-0.00878788	-0.0135	-0.013	0.0131667	0.0154	-0.004	-0.001	0.0281667
								1.46	-0.1075	-0.143333	-0.10625	-0.0390909	-0.0135	-0.013	0.0131667	0.0354	-0.004	-0.001	-0.00516667
								1.47	-0.0241667	0.0233333	-0.10625	-0.099697	-0.0135	0.0203333	0.0465	-0.0046	0.0626667	-0.001	-0.00516667
								1.48	-0.1075	-0.143333	0.0604167	-0.0693939	-0.0135	-0.013	0.0131667	-0.0046	-0.004	-0.001	-0.00516667
								1.49	-0.0241667	-0.06	-0.10625	0.0518182	0.0198333	-0.013	0.0465	0.0554	0.0293333	-0.001	-0.00516667
								1.5	-0.1075	-0.143333	-0.10625	-0.099697	-0.0135	-0.013	0.0798333	-0.0046	0.0293333	-0.001	-0.00516667
								1.51	0.0591667	0.106667	-0.0229167	0.112424	-0.0135	-0.013	0.113167	0.0154	-0.004	-0.001	-0.00516667
								1.52	-0.0241667	-0.143333	-0.0229167	-0.00878788	0.0531667	0.0203333	0.0131667	0.0554	-0.004	-0.001	-0.00516667
								1.53	0.0591667	-0.06	0.0604167	-0.0693939	-0.0135	-0.0463333	-0.0201667	0.0554	0.0293333	-0.001	-0.00516667
								1.54	-0.1075	-0.143333	-0.0229167	-0.0390909	-0.0135	0.120333	-0.0535	-0.0046	0.0293333	-0.001	-0.00516667
								1.55	-0.0241667	0.0233333	-0.10625	-0.00878788	0.0531667	-0.013	0.113167	0.0754	-0.004	-0.001	-0.00516667
								1.56	-0.0241667	-0.06	-0.10625	-0.0390909	0.0198333	-0.0463333	0.1465	-0.0046	0.0626667	-0.001	-0.00516667
								1.57	-0.0241667	-0.143333	-0.0229167	0.0518182	0.0531667	-0.013	0.0131667	0.0554	-0.004	-0.001	-0.00516667
								1.58	-0.1075	-0.143333	-0.10625	-0.00878788	-0.0135	0.0203333	0.0798333	0.0154	0.0293333	-0.001	-0.00516667
								1.59	0.1425	-0.06	-0.10625	-0.0693939	-0.0135	0.0203333	0.113167	0.0354	0.0293333	-0.001	-0.00516667
								1.6	-0.0241667	0.106667	-0.10625	-0.0390909	-0.0135	0.087	-0.0535	0.0154	-0.004	-0.001	-0.00516667
								1.61	-0.0241667	0.0233333	0.0604167	-0.0693939	0.0198333	0.0536667	0.0798333	0.0554	0.0293333	-0.001	-0.00516667
								1.62	-0.0241667	0.106667	-0.10625	0.0518182	-0.0135	-0.0463333	0.113167	0.0154	0.0293333	-0.001	-0.00516667
								1.63	-0.0241667	-0.06	-0.10625	-0.00878788	-0.0135	-0.013	0.0798333	0.0354	-0.004	-0.001	0.0281667
								1.64	0.0591667	-0.143333	-0.0229167	-0.0693939	0.0531667	0.0203333	0.0131667	0.0754	0.0293333	-0.001	-0.00516667
								1.65	-0.0241667	-0.06	-0.10625	-0.0693939	-0.0135	0.0203333	-0.0868333	0.0154	0.0626667	-0.001	-0.00516667
								1.66	0.0591667	-0.143333	0.0604167	-0.00878788	0.0198333	-0.013	-0.0535	-0.0046	0.0293333	-0.001	-0.00516667
								1.67	-0.1075	-0.06	-0.10625	-0.0390909	-0.0135	-0.013	0.0131667	0.0354	0.0293333	-0.001	-0.00516667
								1.68	0.1425	-0.143333	-0.10625	0.0821212	0.0198333	-0.013	-0.0535	0.0354	0.0626667	-0.001	-0.00516667
								1.69	-0.0241667	0.0233333	-0.0229167	-0.0693939	0.0198333	-0.013	0.0131667	-0.0046	-0.004	-0.001	-0.00516667
								1.7	-0.1075	-0.143333	-0.0229167	-0.099697	-0.0135	0.0203333	0.0465	0.0154	-0.004	-0.001	-0.00516667
								1.71	-0.1075	-0.143333	-0.10625	-0.0693939	-0.0135	0.087	0.113167	0.0354	0.0293333	-0.001	-0.00516667
								1.72	-0.0241667	-0.06	-0.10625	-0.0693939	-0.0135	-0.0463333	-0.0201667	0.0154	-0.004	-0.001	-0.00516667
								1.73	0.0591667	0.106667	-0.0229167	0.0821212	0.0198333	0.0536667	-0.0201667	0.0154	-0.004	-0.001	0.0281667
								1.74	-0.1075	-0.06	-0.10625	0.0215152	0.0198333	-0.0463333	0.0798333	0.0154	0.0626667	-0.001	-0.00516667
								1.75	0.0591667	-0.143333	0.0604167	-0.0693939	-0.0135	0.0536667	0.0131667	0.0154	-0.004	-0.001	-0.00516667
								1.76	-0.0241667	-0.06	0.0604167	-0.0390909	0.0198333	-0.013	0.0465	0.0554	0.0626667	-0.001	-0.00516667
								1.77	-0.1075	0.0233333	-0.10625	-0.0390909	0.0198333	0.0203333	0.0465	0.0154	0.0293333	-0.001	-0.00516667
								1.78	-0.1075	0.0233333	-0.10625	0.0518182	0.0531667	0.0203333	0.0465	0.0154	0.0293333	-0.001	-0.00516667
								1.79	-0.1075	0.106667	-0.0229167	-0.0390909	-0.0135	-0.0463333	-0.0535	-0.0046	-0.004	-0.001	-0.00516667
								1.8	0.0591667	-0.06	-0.0229167	-0.0693939	0.0198333	-0.0463333	-0.0201667	-0.0046	0.0293333	-0.001	-0.00516667
								1.81	-0.0241667	-0.143333	-0.10625	-0.0390909	-0.0135	0.0203333	0.0131667	-0.0046	-0.004	-0.001	-0.00516667
								1.82	-0.0241667	0.106667	-0.0229167	-0.00878788	-0.0135	-0.0463333	0.0465	0.0154	-0.004	-0.001	-0.00516667
								1.83	0.0591667	-0.06	-0.0229167	0.0215152	0.0198333	-0.0463333	0.0131667	0.0154	0.0293333	-0.001	0.0281667
								1.84	0.1425	-0.143333	-0.10625	-0.00878788	-0.0135	-0.013	-0.0535	-0.0046	0.0626667	-0.001	-0.00516667
								1.85	-0.1075	-0.143333	-0.0229167	-0.00878788	-0.0135	-0.0463333	0.113167	0.0354	0.0293333	-0.001	-0.00516667
								1.86	0.0591667	-0.143333	-0.10625	-0.00878788	0.0198333	0.0203333	0.0798333	-0.0046	-0.004	-0.001	-0.00516667
								1.87	-0.1075	-0.143333	-0.10625	-0.00878788	-0.0135	0.120333	-0.0535	0.0554	-0.004	-0.001	0.0281667
								1.88	-0.0241667	-0.06	-0.10625	-0.0693939	0.0198333	0.0536667	0.0465	0.0154	-0.004	-0.001	-0.00516667
								1.89	0.0591667	0.0233333	-0.0229167	-0.0693939	-0.0135	-0.013	0.0465	0.0354	-0.004	-0.001	-0.00516667
								1.9	0.0591667	-0.06	-0.0229167	0.0821212	-0.0135	0.087	0.113167	-0.0046	0.0293333	-0.001	-0.00516667
								1.91	0.1425	-0.06	0.0604167	-0.0693939	0.0198333	-0.013	-0.0201667	-0.0046	-0.004	-0.001	0.0281667
								1.92	-0.0241667	-0.06	-0.0229167	-0.0390909	-0.0135	-0.013	0.0465	-0.0046	0.0626667	-0.001	-0.00516667
								1.93	-0.1075	0.106667	-0.10625	0.0518182	0.0198333	0.0203333	0.0798333	0.0554	-0.004	-0.001	-0.00516667
								1.94	0.0591667	-0.06	-0.0229167	-0.0693939	-0.0135	0.0203333	0.0465	0.0154	-0.004	-0.001	-0.00516667
								1.95	0.0591667	0.0233333	-0.0229167	-0.099697	0.0198333	-0.013	0.0798333	0.0354	-0.004	-0.001	-0.00516667
								1.96	-0.0241667	-0.06	-0.10625	-0.099697	-0.0135	0.0203333	-0.0201667	0.0154	-0.004	-0.001	-0.00516667
								1.97	-0.1075	-0.143333	-0.10625	0.0215152	-0.0135	0.0203333	0.0131667	0.0954	-0.004	-0.001	-0.00516667
								1.98	-0.0241667	0.0233333	-0.10625	0.0215152	-0.0135	0.0203333	0.0465	0.0154	0.0293333	-0.001	-0.00516667
								1.99	0.0591667	-0.06	-0.10625	-0.0693939	-0.0135	0.0203333	-0.0868333	0.0154	0.0626667	-0.001	-0.00516667
								2	-0.0241667	0.0233333	-0.0229167	-0.0693939	-0.0135	-0.0463333	-0.0201667	-0.0046	-0.004	-0.001	-0.00516667
								2.01	0.1425	-0.06	0.227083	-0.0390909	-0.0135	0.0203333	0.0131667	0.0154	0.0293333	-0.001	-0.00516667
								2.02	-0.1075	0.0233333	-0.10625	0.0215152	0.0198333	0.0203333	0.0798333	0.0154	0.0293333	-0.001	-0.00516667
								2.03	0.1425	-0.06	-0.10625	0.0215152	0.0198333	0.0203333	0.0131667	0.0354	-0.004	-0.001	-0.00516667
								2.04	-0.0241667	0.19	0.0604167	0.0821212	-0.0135	0.0536667	0.0131667	0.0154	0.0293333	-0.001	-0.00516667
								2.05	0.1425	0.19	-0.10625	-0.0693939	-0.0135	-0.0463333	0.0465	-0.0046	-0.004	-0.001	-0.00516667
								2.06	0.1425	0.106667	-0.0229167	-0.0390909	0.0198333	-0.013	0.0465	-0.0046	0.0293333	-0.001	-0.00516667
								2.07	0.0591667	0.106667	-0.0229167	-0.00878788	-0.0135	-0.013	0.0465	0.0554	0.0293333	-0.001	-0.00516667
								2.08	0.1425	0.19	-0.10625	0.0215152	-0.0135	0.0203333	-0.0201667	-0.0046	-0.004	-0.001	-0.00516667
								2.09	0.0591667	-0.06	-0.10625	-0.00878788	-0.0135	0.0203333	0.0131667	0.0154	-0.004	-0.001	0.0281667
								2.1	0.309167	0.106667	-0.10625	0.0518182	-0.0135	0.0203333	0.113167	0.0554	-0.004	-0.001	-0.00516667
								2.11	-0.0241667	-0.06	-0.10625	-0.0693939	0.0531667	-0.013	0.0465	0.0154	0.0293333	-0.001	-0.00516667
								2.12	-0.1075	-0.06	-0.0229167	-0.0390909	0.0198333	0.0203333	0.0131667	0.0154	-0.004	-0.001	-0.00516667
								2.13	-0.0241667	0.0233333	-0.0229167	-0.0390909	0.0198333	0.0536667	0.0131667	0.0354	-0.004	-0.001	-0.00516667
								2.14	-0.0241667	-0.143333	-0.10625	0.0215152	-0.0135	0.0536667	-0.0868333	0.0154	-0.004	-0.001	-0.00516667
								2.15	0.0591667	-0.143333	-0.10625	0.0215152	0.0198333	-0.013	0.0465	0.0154	-0.004	-0.001	-0.00516667
								2.16	-0.0241667	0.0233333	-0.0229167	-0.0390909	-0.0135	0.0536667	0.0798333	-0.0046	-0.004	-0.001	-0.00516667
								2.17	-0.1075	0.44	-0.0229167	-0.00878788	-0.0135	-0.013	0.0131667	-0.0046	0.0293333	-0.001	-0.00516667
								2.18	0.0591667	-0.06	-0.0229167	0.0518182	-0.0135	0.0203333	0.0131667	-0.0046	-0.004	-0.001	-0.00516667
								2.19	0.1425	0.0233333	-0.10625	-0.0390909	0.0198333	-0.013	0.0131667	0.0354	-0.004	-0.001	-0.00516667
								2.2	-0.1075	0.0233333	-0.10625	-0.00878788	-0.0135	0.0203333	0.0131667	0.0154	-0.004	-0.001	0.0281667
								2.21	-0.0241667	-0.06	0.14375	-0.00878788	-0.0135	-0.013	-0.0535	0.0154	0.0626667	-0.001	-0.00516667
								2.22	-0.0241667	0.19	-0.0229167	0.0821212	-0.0135	0.087	0.113167	0.0354	0.0293333	-0.001	-0.00516667
								2.23	0.0591667	0.0233333	0.0604167	-0.0390909	0.0198333	-0.0463333	0.0131667	-0.0046	0.0293333	-0.001	-0.00516667
								2.24	-0.1075	0.106667	0.0604167	-0.13	-0.0135	-0.013	0.0131667	-0.0046	0.0293333	-0.001	0.0281667
								2.25	0.1425	0.0233333	0.227083	-0.0693939	0.0198333	0.0203333	-0.0535	0.0154	-0.004	-0.001	-0.00516667
								2.26	-0.0241667	-0.06	-0.0229167	-0.0693939	0.0198333	0.0203333	-0.0535	-0.0046	0.0293333	-0.001	-0.00516667
								2.27	0.0591667	-0.143333	0.39375	-0.099697	0.0531667	0.0536667	0.113167	0.0154	-0.004	-0.001	-0.00516667
								2.28	0.309167	-0.06	0.14375	0.17303	-0.0135	0.087	-0.0201667	0.0354	0.0293333	-0.001	-0.00516667
								2.29	0.0591667	-0.06	0.14375	0.0821212	0.0531667	0.0203333	-0.0201667	0.0154	-0.004	-0.001	-0.00516667
								2.3	0.1425	-0.06	0.39375	0.0215152	0.0198333	-0.013	-0.0201667	-0.0046	-0.004	-0.001	-0.00516667
								2.31	-0.0241667	-0.143333	-0.0229167	-0.0693939	-0.0135	-0.0463333	-0.0201667	-0.0046	-0.004	0.0323333	-0.00516667
								2.32	0.309167	0.106667	0.14375	-0.0390909	-0.0135	-0.013	0.0131667	0.0554	-0.004	0.0323333	-0.00516667
								2.33	0.1425	-0.06	0.39375	-0.0390909	-0.0135	0.0203333	-0.0201667	0.0154	0.0293333	-0.001	-0.00516667
								2.34	0.225833	-0.143333	0.310417	0.0215152	-0.0135	-0.0463333	0.0465	0.0154	-0.004	-0.001	-0.00516667
								2.35	0.1425	-0.06	0.14375	0.0215152	-0.0135	-0.0463333	-0.0201667	0.0154	-0.004	-0.001	-0.00516667
								2.36	0.1425	-0.06	0.227083	0.0215152	-0.0135	-0.0463333	0.0131667	0.0354	-0.004	-0.001	-0.00516667
								2.37	0.0591667	0.0233333	0.14375	-0.099697	-0.0135	0.0203333	0.0798333	0.0154	-0.004	-0.001	-0.00516667
								2.38	-0.0241667	-0.06	0.14375	-0.00878788	0.0198333	-0.013	0.0798333	-0.0046	-0.004	-0.001	-0.00516667
								2.39	0.1425	-0.06	0.227083	0.0518182	-0.0135	-0.013	0.0131667	-0.0046	0.0293333	-0.001	-0.00516667
								2.4	-0.0241667	-0.06	0.14375	0.0518182	0.0198333	-0.013	0.0131667	-0.0046	-0.004	-0.001	-0.00516667
								2.41	-0.0241667	-0.143333	0.0604167	-0.099697	-0.0135	-0.0463333	0.0465	-0.0046	0.0293333	-0.001	-0.00516667
								2.42	0.1425	-0.06	0.14375	0.0215152	-0.0135	-0.0463333	-0.0201667	0.0154	-0.004	-0.001	-0.00516667
								2.43	-0.0241667	-0.143333	-0.0229167	-0.0693939	-0.0135	0.0536667	-0.0201667	-0.0046	-0.004	-0.001	-0.00516667
								2.44	-0.1075	-0.143333	-0.0229167	0.0215152	0.0198333	-0.0463333	0.113167	-0.0046	-0.004	-0.001	-0.00516667
								2.45	0.225833	0.106667	-0.10625	0.112424	0.0198333	-0.0463333	-0.0201667	-0.0046	0.0293333	-0.001	0.0281667
								2.46	0.0591667	-0.143333	0.0604167	-0.099697	-0.0135	0.120333	0.0465	0.0354	-0.004	-0.001	0.0281667
								2.47	0.0591667	0.0233333	-0.10625	-0.0390909	0.0198333	-0.0463333	0.0798333	0.0154	-0.004	-0.001	-0.00516667
								2.48	0.0591667	0.106667	-0.0229167	-0.00878788	-0.0135	-0.013	-0.0535	-0.0046	-0.004	-0.001	-0.00516667
								2.49	0.1425	0.0233333	-0.0229167	-0.0390909	-0.0135	0.0203333	0.0131667	0.0354	-0.004	-0.001	-0.00516667
								2.5	0.309167	0.356667	0.14375	-0.0390909	-0.0135	0.0203333	-0.0535	-0.0046	-0.004	-0.001	-0.00516667
								2.51	0.309167	0.0233333	-0.0229167	0.0821212	0.0198333	-0.0463333	-0.0535	-0.0046	0.0626667	-0.001	0.0281667
								2.52	0.225833	0.523333	0.14375	-0.0390909	-0.0135	0.0536667	0.179833	0.0154	0.0293333	-0.001	-0.00516667
								2.53	0.309167	0.19	0.14375	-0.0693939	0.0198333	-0.013	0.0131667	-0.0046	-0.004	-0.001	-0.00516667
								2.54	0.0591667	0.523333	0.14375	0.0821212	-0.0135	-0.013	-0.0535	0.0154	0.0293333	-0.001	0.0281667
								2.55	0.3925	0.523333	0.227083	-0.0693939	0.0198333	-0.0463333	0.0131667	-0.0046	-0.004	-0.001	0.0281667
								2.56	-0.0241667	0.273333	0.0604167	-0.0390909	-0.0135	-0.013	-0.0201667	0.0354	-0.004	0.0323333	-0.00516667
								2.57	0.1425	0.19	0.14375	-0.0390909	0.0198333	0.0203333	-0.0868333	-0.0046	-0.004	-0.001	-0.00516667
								2.58	0.1425	0.106667	0.14375	0.0215152	-0.0135	0.0203333	0.113167	0.0154	-0.004	-0.001	-0.00516667
								2.59	-0.0241667	0.0233333	0.0604167	0.0518182	0.0198333	0.087	0.0131667	-0.0046	-0.004	-0.001	-0.00516667
								2.6	0.1425	-0.06	0.227083	0.0821212	0.0198333	0.0203333	0.0131667	-0.0046	0.0293333	-0.001	-0.00516667
								2.61	-0.1075	0.19	0.227083	-0.0390909	-0.0135	0.0203333	-0.0535	-0.0046	-0.004	-0.001	-0.00516667
								2.62	0.3925	-0.06	0.0604167	-0.00878788	-0.0135	-0.013	0.0465	0.0154	-0.004	0.0323333	-0.00516667
								2.63	0.0591667	0.0233333	0.0604167	-0.0693939	0.0198333	-0.013	-0.0535	0.0154	0.0293333	0.0323333	0.0281667
								2.64	0.0591667	0.0233333	0.14375	-0.0390909	-0.0135	0.0203333	-0.0535	-0.0046	0.0293333	-0.001	-0.00516667
								2.65	-0.1075	0.0233333	0.310417	-0.00878788	0.0198333	-0.013	-0.0201667	-0.0046	0.0626667	-0.001	-0.00516667
								2.66	-0.1075	0.0233333	0.310417	0.112424	-0.0135	-0.0463333	-0.0535	0.0154	0.0293333	-0.001	-0.00516667
								2.67	0.309167	0.0233333	0.0604167	-0.0390909	-0.0135	0.0203333	0.0798333	-0.0046	0.0293333	-0.001	-0.00516667
								2.68	-0.1075	-0.143333	-0.10625	-0.0390909	-0.0135	-0.013	0.0131667	-0.0046	0.0293333	-0.001	-0.00516667
								2.69	-0.0241667	-0.143333	-0.10625	-0.00878788	-0.0135	-0.013	-0.0868333	0.0154	0.0293333	-0.001	-0.00516667
								2.7	-0.0241667	-0.06	0.0604167	-0.00878788	0.0198333	-0.013	0.0131667	-0.0046	0.0293333	-0.001	-0.00516667
								2.71	-0.0241667	-0.06	-0.0229167	0.0821212	-0.0135	0.0536667	0.0465	-0.0046	-0.004	-0.001	-0.00516667
								2.72	0.0591667	-0.143333	-0.0229167	0.0215152	-0.0135	0.0203333	-0.0535	0.0154	0.0293333	-0.001	-0.00516667
								2.73	-0.1075	-0.06	-0.0229167	-0.00878788	-0.0135	0.0203333	0.1465	0.0154	-0.004	-0.001	-0.00516667
								2.74	0.1425	-0.143333	-0.0229167	-0.0693939	0.0198333	-0.0463333	0.0465	-0.0046	-0.004	-0.001	-0.00516667
								2.75	-0.0241667	-0.06	0.14375	0.0518182	0.0198333	0.0203333	0.0131667	-0.0046	0.0626667	-0.001	-0.00516667
								2.76	0.0591667	-0.06	-0.10625	0.0215152	-0.0135	-0.013	-0.0201667	-0.0046	-0.004	-0.001	-0.00516667
								2.77	-0.1075	0.0233333	0.0604167	-0.00878788	0.0198333	-0.0463333	0.0131667	0.0154	0.0293333	-0.001	-0.00516667
								2.78	-0.0241667	-0.143333	-0.0229167	0.0215152	-0.0135	-0.013	-0.0201667	-0.0046	0.0293333	-0.001	-0.00516667
								2.79	-0.1075	0.0233333	0.227083	-0.0390909	0.0198333	-0.013	-0.0201667	-0.0046	-0.004	-0.001	-0.00516667
								2.8	-0.0241667	-0.06	0.0604167	-0.00878788	-0.0135	-0.013	0.0465	-0.0046	0.096	-0.001	-0.00516667
								2.81	-0.1075	-0.143333	0.227083	-0.0390909	-0.0135	-0.0463333	-0.0201667	-0.0046	-0.004	-0.001	-0.00516667
								2.82	0.225833	-0.143333	0.227083	0.0518182	-0.0135	-0.0463333	-0.0535	0.0354	0.0293333	-0.001	-0.00516667
								2.83	-0.0241667	-0.06	0.310417	-0.0390909	0.0531667	0.0203333	0.0131667	-0.0046	0.0293333	-0.001	-0.00516667
								2.84	0.1425	-0.06	-0.10625	-0.00878788	-0.0135	0.0536667	-0.0535	0.0154	0.0293333	-0.001	-0.00516667
								2.85	-0.0241667	-0.06	0.227083	0.0518182	0.0531667	-0.013	0.0465	-0.0046	-0.004	-0.001	-0.00516667
								2.86	-0.1075	-0.143333	-0.0229167	-0.00878788	0.0531667	-0.0463333	0.0131667	-0.0046	-0.004	-0.001	-0.00516667
								2.87	0.0591667	-0.143333	0.227083	-0.0390909	0.0198333	-0.013	0.0131667	-0.0046	-0.004	-0.001	-0.00516667
								2.88	-0.0241667	-0.06	0.14375	-0.00878788	-0.0135	-0.013	-0.0201667	-0.0046	-0.004	-0.001	-0.00516667
								2.89	-0.0241667	-0.06	-0.0229167	0.0215152	0.0198333	-0.013	0.0131667	-0.0046	0.0293333	0.0323333	-0.00516667
								2.9	-0.1075	0.0233333	0.227083	0.0215152	-0.0135	-0.0463333	0.0131667	-0.0046	-0.004	-0.001	-0.00516667
								2.91	-0.0241667	-0.143333	0.0604167	-0.13	-0.0135	-0.0463333	0.0465	-0.0046	-0.004	-0.001	-0.00516667
								2.92	-0.1075	-0.143333	-0.0229167	0.0215152	-0.0135	-0.013	0.0798333	0.0154	-0.004	-0.001	-0.00516667
								2.93	-0.0241667	-0.06	0.14375	0.0215152	0.0198333	-0.0463333	-0.0868333	-0.0046	-0.004	-0.001	-0.00516667
								2.94	0.0591667	0.19	-0.0229167	-0.00878788	-0.0135	0.0536667	0.0465	-0.0046	-0.004	-0.001	-0.00516667
								2.95	-0.1075	-0.143333	0.0604167	0.0215152	-0.0135	0.087	0.0131667	-0.0046	-0.004	-0.001	-0.00516667
								2.96	0.0591667	0.0233333	-0.10625	0.0215152	0.0198333	-0.0463333	0.113167	-0.0046	-0.004	-0.001	0.0281667
								2.97	-0.0241667	0.106667	-0.0229167	0.0518182	-0.0135	0.0203333	-0.0201667	-0.0046	-0.004	-0.001	-0.00516667
								2.98	-0.1075	0.106667	-0.10625	0.142727	-0.0135	-0.0463333	-0.0868333	-0.0046	-0.004	-0.001	-0.00516667
								2.99	-0.1075	0.106667	0.0604167	-0.099697	-0.0135	-0.0463333	0.0131667	-0.0046	-0.004	-0.001	-0.00516667
