# Supplementary material for: Aversive stimuli drive hypothalamus-to-habenula excitation to promote escape behavior
Source: eLife. 2017 Sep 5;6:e30697. doi: 10.7554/eLife.30697 (PMC5606847; doi:10.7554/eLife.30697)
Supplement: Figure 3—source data 1. [file elife-30697-fig3-data1.xlsx]

## Sheet: Figure 3
Figure 3 b
LH-LHb connectivity (-60mV and +10mV): Disrtibution of responses
		CRE-Lines	Vgat-CRE	Pitx3-CRE	SERT-CRE
	opto-responses
	None		3	6	12
	I-AMPA		0	3	2
	I-AMPA + I-GABA		25	20	13
Raw data:I-GABA/I-AMPA												Raw data:I-GABA/I-AMPA	Maximal I-AMPA
Vgat-CRE	Pitx3-CRE	SERT-CRE										Vgat-CRE	Pitx3-CRE	SERT-CRE
0.0390071	0	0.856061										247	79	13.2
0.232365												274	106
	0.63	0.417476												10.3
0.0647773	0.608108	0.325581										474	33.7	43
1.08759													14.7
	0.151899	1.2766										269	132	23.5
0.0759494	0.0226415	0												5
0.1		0										277		43
0.680297	0.611276											701
													376.5
0.277978	1.09848	0.805263										369	527	19
0.133381		0.171429										218	124	28
												238	122
0.289973												211	510
	1.54582	0.760736										211	878	32.6
0		1.19205										14		60.4
0.127962		0.0655738											83.4	61
0.127962												107	72
1	0.152941	1.16667										153	275	4.8
	0.0410023											143
		10.9524										281	20	8.4
0.0941176	0.522782											133	58	35
2.62238	1.73611											247	130
0.024911	0.196364	0.3										105.5	747	18
0.24812
0.101215	4	1.35841											231	22.6
0.028436	0	0.779412										1424	95	13.6
	0.2
	0.0803213												89
0.198736												145	88
0.0384615	1.11255											216	62
	0.368421											251
0.158621
0.101852	0.337079
0.0398406	0
	0.790323
Cumulative probability:I-GABA/I-AMPA										Cumulative probability: maximal I-AMPA
Vgat-CRE			Pitx3-CRE			SERT-CRE				Vgat-CRE			Pitx3-CRE			SERT-CRE
X	Y		X	Y		X	Y			X	Y		X	Y		X	Y
0	4		0	13.6364		0	12.5			14	4.34783		14.7	4.34783		4.8	5.88235
0.024911	8		0.0226415	18.1818		0.0655738	18.75			105.5	8.69565		20	8.69565		5	11.7647
0.028436	12		0.0410023	22.7273		0.171429	25			107	13.0435		33.7	13.0435		8.4	17.6471
0.0384615	16		0.0803213	27.2727		0.3	31.25			133	17.3913		58	17.3913		10.3	23.5294
0.0390071	20		0.151899	31.8182		0.325581	37.5			143	21.7391		62	21.7391		13.2	29.4118
0.0398406	24		0.152941	36.3636		0.417476	43.75			145	26.087		72	26.087		13.6	35.2941
0.0647773	28		0.196364	40.9091		0.760736	50			153	30.4348		79	30.4348		18	41.1765
0.0759494	32		0.2	45.4545		0.779412	56.25			211	39.1304		83.4	34.7826		19	47.0588
0.0941176	36		0.337079	50		0.805263	62.5			216	43.4783		88	39.1304		22.6	52.9412
0.1	40		0.368421	54.5455		0.856061	68.75			218	47.8261		89	43.4783		23.5	58.8235
0.101215	44		0.522782	59.0909		1.16667	75			238	52.1739		95	47.8261		28	64.7059
0.101852	48		0.608108	63.6364		1.19205	81.25			247	60.8696		106	52.1739		32.6	70.5882
0.127962	56		0.611276	68.1818		1.2766	87.5			251	65.2174		122	56.5217		35	76.4706
0.133381	60		0.63	72.7273		1.35841	93.75			269	69.5652		124	60.8696		43	88.2353
0.158621	64		0.790323	77.2727		10.9524	100			274	73.913		130	65.2174		60.4	94.1176
0.198736	68		1.09848	81.8182						277	78.2609		132	69.5652		61	100
0.232365	72		1.11255	86.3636						281	82.6087		231	73.913
0.24812	76		1.54582	90.9091						369	86.9565		275	78.2609
0.277978	80		1.73611	95.4545						474	91.3043		376.5	82.6087
0.289973	84		4	100						701	95.6522		510	86.9565
0.680297	88									1424	100		527	91.3043
1	92												747	95.6522
1.08759	96												878	100
2.62238	100
