# Supplementary material for: Aversive stimuli drive hypothalamus-to-habenula excitation to promote escape behavior
Source: eLife. 2017 Sep 5;6:e30697. doi: 10.7554/eLife.30697 (PMC5606847; doi:10.7554/eLife.30697)
Supplement: Figure 3—supplement figure 1—source data 1. [file elife-30697-fig6.xlsx]

## Sheet: Figure3-figure supplement1
Panel B
LH to LHb connectivity: not LHb output specificity
AMPA and GABAA mediated currents, amplitude pA
	-60mV	+NBQX		+10mV	+PTX
	269	16		183	16
	701	0		93.5	0
	238	7.7
	132	0.2		145	6
				24.8	1
				72	1.4
				4	0.5
	747	25		60	5
	62	18		49	0
		Raw data:	Maximal I-GABAA					Cumulative probability: maximal I-GABAA
		Vgat-CRE	Pitx3-CRE	SERT-CRE				Vgat-CRE			Pitx3-CRE			SERT-CRE
		16	12	11.3				X	Y		X	Y		X	Y
		298	2.4					3	5		0	10.5263		4	7.14286
				4.3				7	10		2.4	15.7895		4.3	14.2857
		36	20.6	14				10	15		12	21.0526		4.8	21.4286
								14	20		20.6	26.3158		5.4	28.5714
		183	145	30				14.4	25		26	31.5789		5.6	35.7143
								16	30		30	36.8421		10.6	42.8571
		77						22	35		35	42.1053		11.3	50
		93.5						23	40		36	47.3684		14	57.1429
			582					25	45		43.6	52.6316		15.3	64.2857
		107		15.3				27	55		49	57.8947		24.8	71.4286
				4.8				33	60		54	63.1579		30	78.5714
								36	65		60	68.4211		30.7	85.7143
		27	78					77	70		78	73.6842		72	92.8571
		27	36	24.8				93.5	75		80	78.9474		92	100
		14		72				107	80		125	84.2105
			43.6	4				183	85		145	89.4737
			125					283	90		257	94.7368
		14.4	54	5.6				298	95		582	100
		375						375	100
		7	80	92
		33	0
		25	26
		3	60	5.4
			257	30.7
		283	35	10.6
			30
		23	0
		22	49
		10
