# Supplementary material for: Aversive stimuli drive hypothalamus-to-habenula excitation to promote escape behavior
Source: eLife. 2017 Sep 5;6:e30697. doi: 10.7554/eLife.30697 (PMC5606847; doi:10.7554/eLife.30697)
Supplement: Figure 4—source data 1. [file elife-30697-fig4-data1.xlsx]

## Sheet: Figure 4
Figure 4 b																	Figure 4 c
Shuttle box test: Examples histogram latency to escape during trials							Shuttle box performance										Looming light test: Examples histogram speed m/s											Looming light test: latency to escape, ms
		CTRL		DREADDi LH-LHb							CTRL									CTRL			DREADDi LH-LHb						CTRL			DREADDi LH-LHb
Trial		Latency, ms		Latency, ms				mouse n		Failures, n		Latency, ms						trials	1	2	3		1	2	3			mouse n			mouse n
1		5008		8336				1		3		4922					time, s											1	1.43		1	0.78
2		4880		5436				2		7		6357					-10		0	0.094	0		0	0	0			2	1.44		2	0.34
3		3037		10000				3		1		2358					-9		0	0.091	0		0.048	0.048	0			3	0.6		3	6.33
4		1379		10000				4		8		5965					-8		0	0	0		0	0	0			4	1.07		4	3.77
5		9027		10000				5		3		5298					-7		0.045	0	0		0	0	0			5	0.25		5	3.51
6		2848		10000				6		1		4044					-6		0.137	0	0.093		0	0	0			6	0.21		6	6.03
7		1526		10000				7		9		6539					-5		0.051	0	0.055		0	0	0			7	1.67		7	4.18
8		4828		5497				8		3		5030					-4		0	0	0		0.052	0	0			8	1.99		8	2.74
9		2553		10000				9		18		7992					-3		0	0	0		0	0	0			9	3.17		9	2.94
10		1207		10000				10		2		3599					-2		0.044	0	0.046		0	0.101	0			10	1.9		10	2.4
11		7720		10000				11		1		2452.07					-1		0	0	0.052		0.077	0.048	0			11	1.61		11	5.97
12		4472		3651				12		0		3763.57					0		0.21	0.149	0.103		0	0.048	0			12	0.8		12	6.33
13		4255		3524				13		1		3207.93					1		0	0.26	0.189		0	0.101	0						13	5.12
14		4735		10000				14		1		3387.63					2		0	0.047	0		0	0	0						14	6.62
15		5669		7057				15		1		5220.3					3		0	0	0		0.131	0	0						15	2.27
16		1832		10000				16		1		3264.13					4		0	0	0		0.051	0	0
17		1790		10000				17		2		4125.9					5		0	0	0		0	0	0.199
18		1665		6936													6		0.098	0	0		0	0	0
19		5443		10000													7		0.098	0	0		0	0	0
20		1366		10000							DREADDi LH-LHb						8		0.044	0	0		0	0	0			Looming light test: strategy adopted, distribution, mice
21		6861		10000				mouse n		Failures, n		Latency, ms					9		0	0	0		0	0	0
22		1639		10000				1		6		4908					10		0	0	0		0	0	0					Freezing	Escaping
23		4124		4397				2		7		5348					11		0.142	0	0		0	0	0			CTRL		1	11
24		7606		10000				3		2		5016					12		0.047	0	0		0	0	0			DREADDi LH-LHb		0	15
25		2884		1280				4		4		4780					13		0	0	0		0	0	0
26		3312		10000				5		8		6172					14		0	0	0		0	0	0
27		3842		4869				6		24		9173					15		0	0	0		0	0.102	0
28		3420		8736				7		17		7762					16		0	0	0		0	0.107	0
29		2402		10000				8		19		8324					17		0	0	0		0	0.054	0
30		10000		10000				9		7		7317					18		0.051	0	0		0	0	0
								10		19		8315					19		0.094	0	0		0	0	0
								11		8		6335.53
								12		8		5699.33
								13		22		8836.77
								14		2		3899.47
								15		19		7859.23
								16		1		3422.1
								17		1		2998.57
