# Supplementary material for: Aversive stimuli drive hypothalamus-to-habenula excitation to promote escape behavior
Source: eLife. 2017 Sep 5;6:e30697. doi: 10.7554/eLife.30697 (PMC5606847; doi:10.7554/eLife.30697)
Supplement: Figure 4—supplement figure 1—source data 1. [file elife-30697-fig7.xlsx]

## Sheet: Figure4-figure supplement1
Panel A																			Panel B
Shuttle box test: Examples histogram latency to escape during trials									Shuttle box performance										Open field test, total distance travelled, m
		CTRL		DREADDi mVTA-LHb									CTRL					mouse n	CTRL		mouse n	DREADDi LH-LHb
Trial		Latency, ms		Latency, ms						mouse n		Failures, n		Latency, ms				1	40.285		1	27.847
1		5199		2253						1		2		3125.7				2	45.608		2	53.068
2		3998		2820						2		1		2600.5				3	44.491		3	35.497
3		1856		10000						3		0		2034				4	49.035		4	46.309
4		4206		3192						4		0		2277.07				5	39.478		5	39.963
5		1795		1319						5		0		2817.8				6	51.509		6	46.4
6		2448		10000						6		1		3588.47
7		1239		2522						7		0		2428.5
8		4297		5371
9		3508		981
10		1758		1812									DREADDi mVTA-LHb						Hot plate test, latency, s
11		1771		4416						mouse n		Failures, n		Latency, ms
12		1378		2965						1		2		4656.47				mouse n	CTRL		mouse n	DREADDi LH-LHb
13		8322		2807						2		5		3874.17				1	17.8		1	18.28
14		6880		3021						3		1		3261.23				2	15.19		2	12.94
15		4461		1193						4		0		2829				3	19.7		3	12.04
16		10000		2148						5		1		2083.53				4	14.87		4	12.51
17		1038		2449						6		1		2181				5	16.5		5	16.03
18		4365		3820						7		0		2541.67				6	7.05		6	16.65
19		5342		3662						8		1		3457.13				7	15.86		7	16.52
20		8713		2026						9		2		3354.43
21		1173		2750						10		0		3031.17
22		5001		5552
23		2614		1862
24		4904		2004
25		3323		2387
26		1753		2004
27		1589		3320
28		2206		2513
29		1084		1982
30		1433		7482
